# Supplementary material for: The INRAE Centre for Vegetable Germplasm: Geographically and Phenotypically Diverse Collections and Their Use in Genetics and Plant Breeding
Source: MDPI journal article supplement (doi:10.3390/plants11030347), 2022-01-27
Supplement: s1 [file s1]

**Supplementary Table S1:** Non-exhaustive list of Vegetable Genebanks worldwide.

| <b>Genebank</b>                                                        | <b>Location</b>                                | <b>Website</b>                                                                                  | <b>Accessions and species</b>                                                                                                                                                                                                                                  |
|------------------------------------------------------------------------|------------------------------------------------|-------------------------------------------------------------------------------------------------|----------------------------------------------------------------------------------------------------------------------------------------------------------------------------------------------------------------------------------------------------------------|
| Scientific Center of Vegetable & Industrial Crops                      | Darakert, Armenia                              |                                                                                                 | Includes melon                                                                                                                                                                                                                                                 |
| AGES, Pflanzengenetische Ressourcen                                    | Linz, Austria                                  | <a href="https://www.genebank.at/en.html">https://www.genebank.at/en.html</a>                   |                                                                                                                                                                                                                                                                |
| Azerbaijan National Academy of Science, Institute of Genetic Resources | Baku, Azerbaijan                               | <a href="https://science.gov.az/en/institutes/338">https://science.gov.az/en/institutes/338</a> | 7355 samples of seeds; 871 species.                                                                                                                                                                                                                            |
| BGH, Vegetable Germplasm Bank                                          | Universidade Federal de Viçosa, Viçosa, Brazil |                                                                                                 | 8,000 vegetables accessions. Priorities: ancient varieties, selections made by farmers, variant forms of cultivated species and wild species of the interest genera to the national horticulture. Solanaceae (44%), Leguminosae (17%) and Cucurbitaceae (16%). |
| Brazilian Agricultural Research Corporation (Embrapa)                  | Brasilia, Brazil                               |                                                                                                 | [1]                                                                                                                                                                                                                                                            |
| Institute for Plant Genetic Resources                                  | Sadovo, Bulgaria                               |                                                                                                 | 60,000 seeds of 2,670 different plant species.                                                                                                                                                                                                                 |
| Plant Gene Resources of Canada                                         | Saskatoon, Canada                              |                                                                                                 | Includes cereals, pulses, oilseeds, tomato, forages and covers many species.                                                                                                                                                                                   |
| Vegetable Genetic Resources in China                                   | Beijing, China                                 |                                                                                                 | [2]                                                                                                                                                                                                                                                            |
| CRI, Department of Vegetables and Special Crops                        | Olomouc, Czech Republic                        |                                                                                                 | Vegetables, spicy, aromatic and medicinal plants                                                                                                                                                                                                               |
| EBI, Ethiopian Biodiversity Institute                                  | Addis Ababa, Ethiopia                          |                                                                                                 | 87,000 accessions of crop and forest germplasm. There are about 78 crop species in the genebank.                                                                                                                                                               |

|                                                                                            |                    |                                                                   |                                                                                                                                                                                                                                                                                                        |
|--------------------------------------------------------------------------------------------|--------------------|-------------------------------------------------------------------|--------------------------------------------------------------------------------------------------------------------------------------------------------------------------------------------------------------------------------------------------------------------------------------------------------|
| INRAE Centre for Vegetable Germplasm (CRB-Légumes)                                         | Avignon, France    |                                                                   | 10,000 accessions of Solanaceae, melon and lettuce                                                                                                                                                                                                                                                     |
| Carrot and other vegetable Apiaceae                                                        | Angers, France     |                                                                   | Carrot and other vegetable Apiaceae                                                                                                                                                                                                                                                                    |
| BrACySol                                                                                   | Ploudaniel, France |                                                                   | Brassicaceae, Alliaceae, Asteraceae, Solanaceae                                                                                                                                                                                                                                                        |
| IPK, Leibniz Institut für Pflanzengenetik und kulturpflanzenforschung                      | Leibniz, Germany   |                                                                   | Totaling 151,002 accessions from 2933 species and 776 genera, the IPK Genebank holds one of the largest collections of crop plants and their wild relatives in the world.                                                                                                                              |
| Plant Genetic Resources Research Institute                                                 | Bunso, Ghana       | <a href="http://pgrri.csir.org.gh/">http://pgrri.csir.org.gh/</a> |                                                                                                                                                                                                                                                                                                        |
| National Agricultural Research and Innovation Centre, Vegetable Crop Research Department   | Gödöllő, Hungary   |                                                                   | Breeding of resistant, spicy pepper, tomato, onion and garlic varieties.                                                                                                                                                                                                                               |
| National Bureau of Plant Genetic Resources, Indian Council of Agricultural Research (ICAR) | New Delhi, India   |                                                                   | Solanaceae: aubergine, tomato, pepper; Cucurbitaceae: pumpkin, melons, gourds and cucumber; Legumes: cowpea, pea, lablab bean, winged bean, faba bean, French bean; Bulb crops: garlic, onion; Root vegetables: radish, carrot, turnip; Also Okra, cole crops, Chinese cabbage, spinach beet, spinach. |
| IBBR, Institute of Biosciences and BioResources, National Research Council of Italy        | Bari, Italy        | <a href="https://ibbr.cnr.it/ibbr/">https://ibbr.cnr.it/ibbr/</a> | At least 3,844 accessions of vegetables (CNR Institutes) [3].                                                                                                                                                                                                                                          |
| National Agricultural Research Centre                                                      | Baq'a, Jordan      | <a href="http://www.ncare.gov.jo/">http://www.ncare.gov.jo/</a>   |                                                                                                                                                                                                                                                                                                        |
| GeRRI, National Genebank of Kenya                                                          | Kikuyu, Kenya      |                                                                   | 50,000 accessions representing over 2,000 plant species.                                                                                                                                                                                                                                               |
| HHRC, Haddokeo Horticulture Research Center                                                | Haddokeo, Laos     |                                                                   | Chili pepper, mustard, loofah, aubergine, cucumber, corn, pumpkin, coriander, dill, tomato, lettuce, amaranth.                                                                                                                                                                                         |
| Department of Agricultural Research                                                        | Yezin, Myanmar     |                                                                   |                                                                                                                                                                                                                                                                                                        |

|                                                                                   |                                                     |                                                                                                                                                                                                     |                                                                                                                                                                                     |
|-----------------------------------------------------------------------------------|-----------------------------------------------------|-----------------------------------------------------------------------------------------------------------------------------------------------------------------------------------------------------|-------------------------------------------------------------------------------------------------------------------------------------------------------------------------------------|
| BANGEV, UACH, National Vegetable Germplasm Bank                                   | Chapingo, Mexico                                    |                                                                                                                                                                                                     | The wild and cultivated species found in Mexico for nutritional, medicinal and comestible use are represented.                                                                      |
| CGN, Centre for Genetic Resources                                                 | Wageningen University and Research, The Netherlands |                                                                                                                                                                                                     | 13,000 accessions of vegetable crops including lettuce, cabbage and fruit vegetables such as pepper, tomato, cucumber and aubergine.                                                |
| Faculty of Agriculture, Sciences and Food                                         | Skopje, North Macedonia                             | <a href="http://www.fznh.ukim.edu.mk/en/">http://www.fznh.ukim.edu.mk/en/</a>                                                                                                                       |                                                                                                                                                                                     |
| National Institute of Horticultural Research                                      | Skierniewic, Poland                                 | <a href="http://www.inhort.pl/en">http://www.inhort.pl/en</a>                                                                                                                                       |                                                                                                                                                                                     |
| Vavilov Institute                                                                 | St. Petersburg, Russian Federation                  |                                                                                                                                                                                                     | [4]                                                                                                                                                                                 |
| RC-Vegetable & Ornamental Plants                                                  | Pretoria, South Africa                              |                                                                                                                                                                                                     | Sweet potatoes, indigenous/traditional African vegetables, potatoes, commercial vegetables                                                                                          |
| CRF, National Plant Genetic Resources Centre                                      | Madrid, Spain                                       |                                                                                                                                                                                                     | 75,000 accessions conserved in the Collections Network of the Spanish Program for the Conservation and Sustainable Use of Plant Genetic Resources for Food and Agriculture (NPPGR). |
| COMAV, Institute for the Preservation and Improvement of Valencian Agro-diversity | Polytechnic University of Valencia, Spain           | <a href="http://www.comav.upv.es/">http://www.comav.upv.es/</a>                                                                                                                                     |                                                                                                                                                                                     |
| Plant Genetic Resources for Food and Agriculture                                  | Khartoum, Sudan                                     | <a href="http://arcsudan.sud/agricultural-plant-genetic-resources-conservation-and-research-center/">http://arcsudan.sud/agricultural-plant-genetic-resources-conservation-and-research-center/</a> | Includes okra, sorghum and banana.                                                                                                                                                  |

|                                                                                       |                                      |                                                                                                                                                       |                                                                                                                                                                                                                        |
|---------------------------------------------------------------------------------------|--------------------------------------|-------------------------------------------------------------------------------------------------------------------------------------------------------|------------------------------------------------------------------------------------------------------------------------------------------------------------------------------------------------------------------------|
| Plant Genetic Resources for Food and Agriculture, Agroscope                           | Switzerland                          |                                                                                                                                                       | 759 accessions; includes varieties or accessions which originated or were bred in Switzerland, or were of national, regional or local importance and are not (or no longer) protected by intellectual property rights. |
| World Vegetable genebank (formerly AVRDC)                                             | Tainan, Taiwan                       |                                                                                                                                                       | 61,000 accessions from 155 countries, including about 12,000 accessions of indigenous vegetables.                                                                                                                      |
| DOA Genebank                                                                          | Pathum Thani, Thailand               | <a href="https://www.doa.go.th/genebankthailand/">https://www.doa.go.th/genebankthailand/</a>                                                         |                                                                                                                                                                                                                        |
| Banque Nationale de Gènes de Tunisie                                                  | Tunis, Tunisia                       | <a href="http://www.bng.nat.tn/">http://www.bng.nat.tn/</a>                                                                                           | 100 vegetable species of which 37 are cultivated in Tunisia.                                                                                                                                                           |
| Aegean Agricultural Research Institute, Biodiversity and Genetic Resources Department | Izmir, Turkey                        |                                                                                                                                                       | Over 2400 Cucurbitaceae                                                                                                                                                                                                |
| National Center for Plant Genetic Resources of Ukraine                                | Kharkiv, Ukraine                     |                                                                                                                                                       | 74,400 specimens belonging to 342 crops and 739 botanical plant species.                                                                                                                                               |
| UK Vegetable Genebank                                                                 | University of Warwick, UK            | <a href="https://warwick.ac.uk/fac/sci/lifesci/wcc/gru/genebank/collections/">https://warwick.ac.uk/fac/sci/lifesci/wcc/gru/genebank/collections/</a> | 14,000 samples of vegetable crops such as cauliflower, carrot, kale, lettuce and onions                                                                                                                                |
| TGRC, Tomato Genetics Resource Centre                                                 | University of California, Davis, USA |                                                                                                                                                       | Mainly wild tomato accessions collected first by C Rick.<br><a href="https://tgrc.ucdavis.edu/">https://tgrc.ucdavis.edu/</a>                                                                                          |
| USDA-ARS, Vegetable Germplasm Collection                                              | USA                                  | <a href="https://data.nal.usda.gov/dataset/national-plant-germplasm-system">https://data.nal.usda.gov/dataset/national-plant-germplasm-system</a>     | Potato, carrot, onion, cucumber, cranberry and 3000 lettuce accessions (Pullman, WA site)                                                                                                                              |

|                                                |        |  |                                                                                                                                                                                                                                                                            |
|------------------------------------------------|--------|--|----------------------------------------------------------------------------------------------------------------------------------------------------------------------------------------------------------------------------------------------------------------------------|
| NPGRC, National Plant Genetic Resources Centre | Zambia |  | Over 2000 germplasm accessions of different crops including Maize, Sorghum, Millets, Rice, Finger millet, Pearl millet, Cowpea, Bean and Groundnut. Major root and tuber crops (cassava and sweet potato) and indigenous/local vegetable species have also been collected. |
|------------------------------------------------|--------|--|----------------------------------------------------------------------------------------------------------------------------------------------------------------------------------------------------------------------------------------------------------------------------|

Note: A list of European genebanks can be found in Daunay *et al*, 2003 [5].

## References

1. Ribeiro, C.; Reifschneider, F.; Carvalho, S.; Bianchetti, L.; Buso, G. Embrapa's Capsicum Breeding Program—Looking Back ... into the Future. *Crop Breeding, Genetics and Genomics* **2019**, *2*, doi:10.20900/cbagg20200001.
2. Wang, H.; Li, X.; Song, J. Vegetable Genetic Resources in China. *Horticultural Plant Journal* **2018**, *4*, 83–88, doi:10.1016/j.hpj.2018.03.003.
3. Hammer, K.; Montesano, V.; Direnzo, P.; Laghetti, G. Conservation of Crop Genetic Resources in Italy with a Focus on Vegetables and a Case Study of a Neglected Race of Brassica Oleracea. *Agriculture* **2018**, *8*, 105, doi:10.3390/agriculture8070105.
4. Dzyubenko, N.I. Vavilov's Collection of Worldwide Crop Genetic Resources in the 21st Century. *Biopreserv Biobank* **2018**, *16*, 377–383, doi:10.1089/bio.2018.0045.
5. Daunay, M.-C.; Maggioni, L.; Lipman, E. *Solanaceae Genetic Resources in Europe: Report of Two Meetings, 21 September 2001, Nijmegen, The Netherlands ; 22 May 2003, Skierniewice, Poland; ECP/GR [European Cooperative Programme for Crop Genetic Resources Networks]; IPGRI: Rom, 2003; ISBN 978-92-9043-579-2.*
