# Supplementary material for: The INRAE Centre for Vegetable Germplasm: Geographically and Phenotypically Diverse Collections and Their Use in Genetics and Plant Breeding
Source: Plants (Basel). 2022 Jan 27;11(3):347. doi: 10.3390/plants11030347 (PMC8838894; doi:10.3390/plants11030347)
Supplement: Supplementary file 1 [file plants-11-00347-s001.zip › SuppTable2_SalinierEtAl.xlsx]

## Sheet: AUBERGINE
Accession code	Name	Introduction year	Origin country	Donor	Taxon	Genus	Subgenus	Species	Biological status	National collection	Network collection
MM 00002	PUSA PURPLE LONG	1962	India	IND. AGRIC. RES. INST.	Aubergine	Solanum		melongena		NO	NO
MM 00006	DESL	1962	India	INST. VAVILOV	Aubergine	Solanum		melongena		NO	YES
MM 00007	KALIMPONG	1962	India	INST. VAVILOV	Aubergine	Solanum		melongena		NO	YES
MM 00008	Type demi-long régulier 1	1962	United States of America	LOCKWOOD	Aubergine	Solanum		melongena	Traditional cultivar	YES	YES
MM 00009	PI 164941	1962	United States of America	LOCKWOOD	Aubergine	Solanum		melongena		NO	NO
MM 00011	LONGUE DE BARDATES (M 183)	1962	Greece	Private individual	Aubergine	Solanum		melongena		NO	YES
MM 00013	LONGUE D'ARGOS (II 3886)	1962	Greece	Private individual	Aubergine	Solanum		melongena		NO	YES
MM 00014	Ronde 3	1962	Greece	Private individual	Aubergine	Solanum		melongena		NO	YES
MM 00015	RONDE (II 3985)	1962	Greece	Private individual	Aubergine	Solanum		melongena		NO	NO
MM 00016 BIS	NEW LONG YAMATO	1962	Japan	YAMATO NOEN	Aubergine	Solanum		melongena		NO	YES
MM 00021	LUNGHISSIMA PRECOCE VIOLETTA	1962	Italy	GHISLENI	Aubergine	Solanum		melongena		NO	NO
MM 00021 BIS	LUNGHISSIMA PRECOCE VIOLETTA	1962	Italy	GHISLENI	Aubergine	Solanum		melongena		NO	NO
MM 00022	VIOLETTA LUNGA 3	1962	Italy	GHISLENI	Aubergine	Solanum		melongena		NO	YES
MM 00023	MEZZA LUNGA VIOLETTA 1	1962	Italy	GHISLENI	Aubergine	Solanum		melongena		NO	YES
MM 00023 BIS	MEZZA LUNGA VIOLETTA 2	1962	Italy	GHISLENI	Aubergine	Solanum		melongena		NO	YES
MM 00026	VIOLETTA ROTUNDA	1962	Italy	GHISLENI	Aubergine	Solanum		melongena		NO	NO
MM 00027	GROSSISSIMA DI FIRENZE	1962	Italy	GHISLENI	Aubergine	Solanum		melongena		NO	YES
MM 00035	VIOLETTE DE BARBENTANE	1962	France	ROUMANILLE SEMENCES	Aubergine	Solanum		melongena		NO	NO
MM 00035 BIS	VIOLETTE DE BARBENTANE	1962	France	ROUMANILLE SEMENCES	Aubergine	Solanum		melongena		YES	YES
MM 00039	NOIRE DE CHATEAURENARD	1962	France	INRAE	Aubergine	Solanum		melongena	Traditional cultivar	YES	YES
MM 00042	VIOLETTE LONGUE HATIVE	1962	France	CAYEUX SEMENCES	Aubergine	Solanum		melongena	Traditional cultivar	YES	YES
MM 00048	VIOLETTE LONGUE	1962	France	ROUMANILLE SEMENCES	Aubergine	Solanum		melongena	Traditional cultivar	YES	YES
MM 00054	VIOLETTE LONGUE D'AVIGNON	1962	France	BLAIN SEMENCES	Aubergine	Solanum		melongena	Traditional cultivar	YES	YES
MM 00055	VIOLETTE LONGUE DE ST REMY	1962	France	GARCIN-MISTRAL SEMENCES	Aubergine	Solanum		melongena	Traditional cultivar	YES	YES
MM 00056	VIOLETTE DE TOULOUSE 2	1962	France	CLAUSE SEMENCES	Aubergine	Solanum		melongena	Traditional cultivar	YES	YES
MM 00058	VIOLETTE NAINE TRES HATIVE	1962	France	BLAIN SEMENCES	Aubergine	Solanum		melongena	Traditional cultivar	YES	YES
MM 00061	ZEBRINA	1962	Spain	VILMORIN SEMENCES	Aubergine	Solanum		melongena		YES	YES
MM 00064	RONDE DE VALENCE	1962	France	TEZIER SEMENCES	Aubergine	Solanum		melongena	Traditional cultivar	YES	YES
MM 00067	RONDE DE CHINE	1962	France	BLAIN SEMENCES	Aubergine	Solanum		melongena		YES	YES
MM 00069	MONSTRUEUSE DE NEW YORK 1	1962	United States of America	CLAUSE SEMENCES	Aubergine	Solanum		melongena		YES	YES
MM 00073	MONSTRUEUSE DE NEW YORK 2	1962	United States of America	VILMORIN SEMENCES	Aubergine	Solanum		melongena		NO	YES
MM 00085	MONSTRUOSA SICILIA	1962	Italy	UNKNOWN	Aubergine	Solanum		melongena		NO	YES
MM 00086	TCHESKY RANY	1962	Czechia	RES. INST. OF VEG.	Aubergine	Solanum		melongena		NO	NO
MM 00087	DLINNYJ FIOLETOVIJ	1962	Czechia	RES. INST. OF VEG.	Aubergine	Solanum		melongena		NO	NO
MM 00088	TCHERNA KRASAVICE	1962	Czechia	RES. INST. OF VEG.	Aubergine	Solanum		melongena		NO	YES
MM 00091	BLACK BEAUTY 1	1962	United States of America	U.S.D.A.	Aubergine	Solanum		melongena	Advanced or improved cultivar	NO	YES
MM 00092	FLORIDA HIGHBUSH	1962	United States of America	U.S.D.A.	Aubergine	Solanum		melongena	Advanced or improved cultivar	NO	YES
MM 00093	FLORIDA MARKET 4	1962	United States of America	U.S.D.A.	Aubergine	Solanum		melongena		NO	YES
MM 00096	BRINJAL LONG 2	1962	India	AMBASSADE DE FRANCE-NEW DELI	Aubergine	Solanum		melongena		NO	NO
MM 00097	BRINJAL ROUND 3	1962	India	AMBASSADE DE FRANCE-NEW DELI	Aubergine	Solanum		melongena		NO	NO
MM 00098	BRINJAL ROUND 4	1962	India	AMBASSADE DE FRANCE-NEW DELI	Aubergine	Solanum		melongena		NO	YES
MM 00099	KITTA	1962	Japan	INRAE	Aubergine	Solanum		melongena		NO	NO
MM 00100	KANTO AO	1962	Japan	INRAE	Aubergine	Solanum		melongena		NO	YES
MM 00100 BIS	KANTO AO	1962	Japan	INRAE	Aubergine	Solanum		melongena		NO	NO
MM 00100 QUATER	KANTO AO	1962	Japan	INRAE	Aubergine	Solanum		melongena		NO	NO
MM 00100 TER	KANTO AO	1962	Japan	INRAE	Aubergine	Solanum		melongena		NO	NO
MM 00101	AOMARU	1962	Japan	INRAE	Aubergine	Solanum		melongena		NO	YES
MM 00102	WASE SHINKURO	1962	Japan	INRAE	Aubergine	Solanum		melongena		NO	NO
MM 00103	SHINKURO	1962	Japan	INRAE	Aubergine	Solanum		melongena		NO	YES
MM 00106	GANDIA RONDE 1	1962	Spain	INRAE	Aubergine	Solanum		melongena	Traditional cultivar	NO	YES
MM 00106 BIS	GANDIA RONDE 2	1962	Spain	INRAE	Aubergine	Solanum		melongena		NO	YES
MM 00107	GANDIA LONGUE 1	1962	Spain	INRAE	Aubergine	Solanum		melongena		NO	YES
MM 00107 BIS	GANDIA LONGUE 2	1962	Spain	INRAE	Aubergine	Solanum		melongena		NO	YES
MM 00107 QUATER	GANDIA LONGUE 3	1962	Spain	INRAE	Aubergine	Solanum		melongena		NO	YES
MM 00108	TYPE DEMI-LONG REGULIER	1962	France	INRAE	Aubergine	Solanum		melongena		NO	NO
MM 00108 BIS	TYPE DEMI-LONG REGULIER = LF3	1962	France	INRAE	Aubergine	Solanum		melongena	Traditional cultivar	YES	YES
MM 00108 TER	TYPE DEMI-LONG REGULIER 2	1962	France	INRAE	Aubergine	Solanum		melongena		YES	YES
MM 00110	MELANZANA TONDA	1963	Italy	MATTA-INST. DE PATHOL. VEG.	Aubergine	Solanum		melongena		NO	YES
MM 00111	PETRONCIANA (VIOLETTE LONGUE)	1964	Italy	ALBENGA	Aubergine	Solanum		melongena		NO	NO
MM 00113	BERENGENA LARGA MARADA	1965	Spain	CARRAVEDO-SERV. DI INVESTIG. AGRARIA	Aubergine	Solanum		melongena		NO	YES
MM 00114	BERENGENA LARGA NEGRA 1	1965	Spain	CARRAVEDO-SERV. DI INVESTIG. AGRARIA	Aubergine	Solanum		melongena		NO	YES
MM 00116	BERENGENA LARGA 2	1965	Spain	INRAE	Aubergine	Solanum		melongena		NO	YES
MM 00118	HARBIN	1965	China	INST. FUR KULTURPFL. FORSCH.	Aubergine	Solanum		melongena		NO	NO
MM 00120	NAN TAN	1965	China	INST. FUR KULTURPFL. FORSCH.	Aubergine	Solanum		melongena		NO	YES
MM 00122	CHINE 1	1965	China	INST. FUR KULTURPFL. FORSCH.	Aubergine	Solanum		melongena		NO	YES
MM 00123	CHINE 2	1965	China	INST. FUR KULTURPFL. FORSCH.	Aubergine	Solanum		melongena		NO	YES
MM 00124	CHINE	1965	China	INST. FUR KULTURPFL. FORSCH.	Aubergine	Solanum		melongena		NO	NO
MM 00125	KRUGLYI PEKIN	1965	Russian Federation	INST. FUR KULTURPFL. FORSCH.	Aubergine	Solanum		melongena		NO	YES
MM 00126	TURQUIE	1965	Turkey	INST. FUR KULTURPFL. FORSCH.	Aubergine	Solanum		melongena		NO	YES
MM 00127	TURQUIE	1965	Turkey	INST. FUR KULTURPFL. FORSCH.	Aubergine	Solanum		melongena		NO	NO
MM 00128	BUKURESTI	1965	Romania	INST. FUR KULTURPFL. FORSCH.	Aubergine	Solanum		melongena		NO	NO
MM 00129	FRUHVIOLETTE	1965	Czechia	INST. FUR KULTURPFL. FORSCH.	Aubergine	Solanum		melongena		NO	YES
MM 00130	DELIKATESS	1965	Czechia	INST. FUR KULTURPFL. FORSCH.	Aubergine	Solanum		melongena		NO	NO
MM 00131	BOLGARSKIJ 014	1965	Czechia	INST. FUR KULTURPFL. FORSCH.	Aubergine	Solanum		melongena		NO	NO
MM 00132	REUNIONITA	1965	Réunion	CHAMBRE D'AGRICULTURE	Aubergine	Solanum	LEPTOSTEMONUM	MACROCARPON L.		NO	NO
MM 00133	DE BUKAREST = BUCA	1965	Romania	INRAE	Aubergine	Solanum		melongena		NO	YES
MM 00134	Nameless	1965	Martinique	LONGUETEAU-I.R.A.T.	Aubergine	Solanum	LEPTOSTEMONUM	AETHIOPICUM L. GR. ACULEATUM		NO	NO
MM 00136	FLORIDA MARKET 10	1965	United States of America	ASGROW SEED	Aubergine	Solanum		melongena		NO	NO
MM 00137 BIS	ROUND	1965	India	TOMASSINI	Aubergine	Solanum		melongena		NO	YES
MM 00140	JB 200	1967	Japan	JAPAN VEG. BREEDERS ASSOC.	Aubergine	Solanum		melongena		NO	YES
MM 00141	VIOLETTE D'AVIGNON	1967	France	Private individual	Aubergine	Solanum		melongena	Traditional cultivar	YES	YES
MM 00142	NOIRE PRECOCE	1967	France	Private individual	Aubergine	Solanum		melongena	Traditional cultivar	YES	YES
MM 00143	AUB. DE JORDANIE	1967	State of Palestine	CLAUSE SEMENCES	Aubergine	Solanum		melongena		NO	YES
MM 00144	PURPLE LONG	1967	United States of America	MOTEMPS-C.T.C.P.A.	Aubergine	Solanum		melongena		NO	NO
MM 00145	LONG PURPLE 77113	1967	United States of America	ASGROW SEED	Aubergine	Solanum		melongena		NO	YES
MM 00146	FLORIDA MARKET 1077114	1967	United States of America	ASGROW SEED	Aubergine	Solanum		melongena		NO	NO
MM 00147	BLACK BEAUTY 91028	1967	United States of America	ASGROW SEED	Aubergine	Solanum		melongena		NO	YES
MM 00149	GNANGNAN/BOT3	1967	Côte d'Ivoire	ROLLIN-F.A.O.	Aubergine	Solanum	LEPTOSTEMONUM	AETHIOPICUM L. GR. GILO		NO	NO
MM 00150	GROSSE VIOLETTE DE GAGNOA	1967	Côte d'Ivoire	ROLLIN-F.A.O.	Aubergine	Solanum	LEPTOSTEMONUM	MACROCARPON L.		NO	NO
MM 00152	CEYLAN SM 164	1968	Sri Lanka	SOITOUT-I.R.A.T.	Aubergine	Solanum		melongena		YES	YES
MM 00153	11P12 YALOVA 59	1968	Turkey	UNKNOWN	Aubergine	Solanum		melongena		NO	YES
MM 00154	AUB. D'ALEXINAT	1968	Serbia	INRAE	Aubergine	Solanum		melongena		NO	YES
MM 00158	IAN TZIAO TSE	1970	China	MURTAZOV	Aubergine	Solanum		melongena		NO	NO
MM 00159	SIAN TZI	1970	China	MURTAZOV	Aubergine	Solanum		melongena		NO	NO
MM 00160	KONZERVNI 10	1970	Russian Federation	MURTAZOV	Aubergine	Solanum		melongena		NO	NO
MM 00161	TRACHIETZ N°11	1970	Bulgaria	MURTAZOV	Aubergine	Solanum		melongena		NO	YES
MM 00162	TRACHIETZ N°12	1970	Bulgaria	MURTAZOV	Aubergine	Solanum		melongena		NO	YES
MM 00163	EREVAN DLINIJ	1970	Armenia	MURTAZOV	Aubergine	Solanum		melongena		NO	NO
MM 00164	N°43 X ISRAELSKI	1970	Bulgaria	MURTAZOV	Aubergine	Solanum		melongena		NO	YES
MM 00164 bis	N°43 x ISRAELSKI	1970	Bulgaria	MURTAZOV	Aubergine	Solanum		melongena		NO	NO
MM 00165	SINAMPIRO	1970	Philippines	VILLAREAL-UNITS. COLL.-LAGURA	Aubergine	Solanum		melongena		NO	YES
MM 00166	DUMAGNETE	1970	Philippines	VILLAREAL-UNITS. COLL.-LAGURA	Aubergine	Solanum		melongena		NO	YES
MM 00167	BLANCHE DE BOLOGNE	1970	Italy	INRAE	Aubergine	Solanum		melongena		NO	YES
MM 00168	N°12	1970	Bulgaria	KOLEV-INST. GENET.-SOFIA	Aubergine	Solanum		melongena		NO	NO
MM 00169	LIGNEE JAPONAISE	1970	Japan	INRAE	Aubergine	Solanum		melongena		NO	NO
MM 00170	SM 164 CEYLAN	1971	Sri Lanka	I.R.A.T.	Aubergine	Solanum		melongena		YES	YES
MM 00171	CEYLAN X FLORIDA MARKET N° 4	1971	UNKNOWN	INRAE	Aubergine	Solanum		melongena		NO	NO
MM 00172	CEYLAN X FLORIDA MARKET N°10	1971	UNKNOWN	INRAE	Aubergine	Solanum		melongena	Breeder's material	NO	YES
MM 00173	CEYLAN X FLORIDA MARKET N°15	1971	UNKNOWN	INRAE	Aubergine	Solanum		melongena		NO	NO
MM 00174	CEYLAN X FLORIDA MARKET N°17	1971	UNKNOWN	INRAE	Aubergine	Solanum		melongena		NO	NO
MM 00175	CEYLAN X FLORIDA MARKET N°20 X DD	1971	UNKNOWN	INRAE	Aubergine	Solanum		melongena		NO	YES
MM 00177	MONEYMAKER N°2 (SM 70537)	1971	Japan	TAKII SEED	Aubergine	Solanum		melongena		NO	NO
MM 00178	PUERTO RICON BEAUTY	1971	United States of America	INRAE	Aubergine	Solanum		melongena		NO	NO
MM 00179	ZEBREE A CHAIR VERTE (SM 70002)	1971	Guadeloupe	INRAE	Aubergine	Solanum		melongena		NO	NO
MM 00180	CAYENNE (SM 70517)	1971	French Guiana	I.R.A.T.	Aubergine	Solanum		melongena		YES	YES
MM 00181	CHAIR VERTE PEAU INCOLORE 10-70 (SM 70003)	1971	Guadeloupe	INRAE	Aubergine	Solanum		melongena		YES	YES
MM 00182	LAMENTIN 1	1971	Martinique	INRAE	Aubergine	Solanum		melongena		YES	YES
MM 00183	ARANGUEZ 1	1971	Trinidad and Tobago	INRAE	Aubergine	Solanum		melongena		NO	NO
MM 00183 BIS	ARANGUEZ 2	1971	Trinidad and Tobago	INRAE	Aubergine	Solanum		melongena		YES	YES
MM 00183 QUATER	ARANGUEZ (SM 70538)	1971	Trinidad and Tobago	INRAE	Aubergine	Solanum		melongena		NO	NO
MM 00183 TER	ARANGUEZ (SM 70538)	1971	Trinidad and Tobago	INRAE	Aubergine	Solanum		melongena		YES	YES
MM 00184	ARANGUEZ (SM 70540)	1971	Trinidad and Tobago	INRAE	Aubergine	Solanum		melongena		NO	NO
MM 00185	ARANGUEZ 3	1971	Trinidad and Tobago	INRAE	Aubergine	Solanum		melongena		NO	YES
MM 00186	RONDE D'AVIGNON	1971	France	Private individual	Aubergine	Solanum		melongena		YES	YES
MM 00187	POMPANO PRIDE	1972	United States of America	NIAGARA SEEDS	Aubergine	Solanum		melongena	Advanced or improved cultivar	NO	YES
MM 00188	N°446-3	1972	Israel	SHIFFRISS-VOLCANI INST.	Aubergine	Solanum		melongena		NO	YES
MM 00189	AUB. A PETITES GRAINES	1972	France	CAILLARD SEMENCE	Aubergine	Solanum		melongena		YES	YES
MM 00190	ANNAMALAI	1972	India	CHOUDHURY-IND. AGRIC. RES. INST.-NEW DELHI	Aubergine	Solanum		melongena		NO	NO
MM 00191	UNIVERSAL 6 (1)	1973	Russian Federation	BUJDOSO-INST. DE KELSKEMET	Aubergine	Solanum		melongena		NO	YES
MM 00192	KONZERVNIJ 10	1973	Russian Federation	BUJDOSO-INST. DE KELSKEMET	Aubergine	Solanum		melongena		NO	YES
MM 00193	L78 X BB	1973	Romania	BUJDOSO-INST. DE KELSKEMET	Aubergine	Solanum		melongena		NO	YES
MM 00194	LONGUE DE GOULT	1974	France	INRAE	Aubergine	Solanum		melongena	Traditional cultivar	YES	YES
MM 00195	Nameless	1973	Tunisia	INRAE	Aubergine	Solanum	LEPTOSTEMONUM	LINNAEANUM HEPPER & JAEGER	Wild	NO	YES
MM 00196	TYPE FERKE 1 OLIVE	1974	Burkina Faso	INRAE	Aubergine	Solanum	LEPTOSTEMONUM	AETHIOPICUM L. GR. GILO		NO	NO
MM 00196 BIS	TYPE FERKE 2 APLATI	1974	Burkina Faso	INRAE	Aubergine	Solanum	LEPTOSTEMONUM	AETHIOPICUM L. GR. KUMBA		NO	NO
MM 00196 TER	HYBRIDE NATUREL MM 196 x MM 196 BIS	1974	Burkina Faso	INRAE	Aubergine	Solanum	LEPTOSTEMONUM	AETHIOPICUM L. GR. GILO		NO	NO
MM 00197	LIU YE QIE (A 6 FEUILLES)	1975	China	CAUDERON	Aubergine	Solanum		melongena		NO	YES
MM 00198	RADJA	1975	Netherlands	RIJK ZWAAN	Aubergine	Solanum		melongena	Advanced or improved cultivar	NO	YES
MM 00203	PI 286103	1963	United States of America	BRAVERMANN-U.S.D.A.	Aubergine	Solanum		melongena		NO	YES
MM 00206	PI 286106	1963	United States of America	BRAVERMANN-U.S.D.A.	Aubergine	Solanum		melongena		NO	YES
MM 00207	PI 286107	1963	United States of America	BRAVERMANN-U.S.D.A.	Aubergine	Solanum		melongena		NO	YES
MM 00209	METLINE 1975	1975	Tunisia	HAMZA-I.N.R.A.T.	Aubergine	Solanum	LEPTOSTEMONUM	LINNAEANUM HEPPER & JAEGER	Wild	NO	NO
MM 00210	(I)	1975	Ethiopia	INRAE	Aubergine	Solanum	LEPTOSTEMONUM	INCANUM L. (GROUPE A)	Wild	NO	YES
MM 00211	(II)	1976	Ethiopia	INRAE	Aubergine	Solanum	LEPTOSTEMONUM	INCANUM L. (GROUPE A)	Wild	NO	NO
MM 00212	7613 (PI 286102)	1977	United States of America	HONMA-UNIV. OF MICHIGAN	Aubergine	Solanum		melongena		NO	YES
MM 00214	7616 (SM 286105) (ou 7615 (PI 286105))	1977	United States of America	HONMA-UNIV. OF MICHIGAN	Aubergine	Solanum		melongena		NO	YES
MM 00215	76173 M	1977	United States of America	HONMA-UNIV. OF MICHIGAN	Aubergine	Solanum		melongena		NO	NO
MM 00216	76L4	1977	United States of America	HONMA-UNIV. OF MICHIGAN	Aubergine	Solanum		melongena		NO	NO
MM 00217	G 23329	1977	United States of America	HONMA-UNIV. OF MICHIGAN	Aubergine	Solanum		melongena		NO	YES
MM 00218	G 23330	1977	United States of America	HONMA-UNIV. OF MICHIGAN	Aubergine	Solanum		melongena		NO	NO
MM 00220	Nameless	1978	Côte d'Ivoire	GEVES	Aubergine	Solanum	LEPTOSTEMONUM	MACROCARPON L.		NO	NO
MM 00221	AUB. NON AMERE	1978	Côte d'Ivoire	GEVES	Aubergine	Solanum		melongena		NO	NO
MM 00223	Nameless	1978	Côte d'Ivoire	GEVES	Aubergine	Solanum	LEPTOSTEMONUM	AETHIOPICUM L. GR. GILO		NO	NO
MM 00223 BIS	Nameless	1978	Côte d'Ivoire	GEVES	Aubergine	Solanum	LEPTOSTEMONUM	AETHIOPICUM L. GR. GILO		NO	NO
MM 00229	AUBERGINE DE FERKE	1978	Côte d'Ivoire	GEVES	Aubergine	Solanum	LEPTOSTEMONUM	AETHIOPICUM L. GR. GILO		NO	YES
MM 00232	Nameless	1978	Côte d'Ivoire	INRAE	Aubergine	Solanum	LEPTOSTEMONUM	AETHIOPICUM L. GR. GILO		NO	NO
MM 00232 BIS	COTE DE RUBIS	1978	Côte d'Ivoire	INRAE	Aubergine	Solanum	LEPTOSTEMONUM	AETHIOPICUM L. GR. GILO		NO	YES
MM 00233	Nameless	1978	Côte d'Ivoire	INRAE	Aubergine	Solanum	LEPTOSTEMONUM	AETHIOPICUM L. GR. GILO		NO	NO
MM 00233 TER	Nameless	1978	Côte d'Ivoire	INRAE	Aubergine	Solanum	LEPTOSTEMONUM	AETHIOPICUM L. GR. GILO		NO	NO
MM 00234 BIS	AUBERGINE DE FERKE	1978	Côte d'Ivoire	INRAE	Aubergine	Solanum	LEPTOSTEMONUM	AETHIOPICUM L. GR. GILO-ANGUIVI		NO	NO
MM 00236	BOT10g	1978	Côte d'Ivoire	INRAE	Aubergine	Solanum	LEPTOSTEMONUM	AETHIOPICUM L. GR. GILO-ANGUIVI		NO	NO
MM 00236 BIS	Nameless	1978	Côte d'Ivoire	INRAE	Aubergine	Solanum	LEPTOSTEMONUM	AETHIOPICUM L. GR. GILO-ANGUIVI		NO	NO
MM 00236 TER	Nameless	1978	Côte d'Ivoire	INRAE	Aubergine	Solanum	LEPTOSTEMONUM	AETHIOPICUM L. GR. GILO		NO	NO
MM 00237	Nameless	1978	Côte d'Ivoire	INRAE	Aubergine	Solanum	LEPTOSTEMONUM	AETHIOPICUM L. GR. GILO		NO	NO
MM 00241	Nameless	1978	Côte d'Ivoire	INRAE	Aubergine	Solanum	LEPTOSTEMONUM	AETHIOPICUM L. GR. GILO-ANGUIVI		NO	NO
MM 00243 BIS	Nameless	1978	Côte d'Ivoire	INRAE	Aubergine	Solanum	LEPTOSTEMONUM	AETHIOPICUM L. GR. GILO-ANGUIVI		NO	NO
MM 00245	Nameless	1978	Côte d'Ivoire	INRAE	Aubergine	Solanum	LEPTOSTEMONUM	AETHIOPICUM L. GR. GILO-ANGUIVI		NO	NO
MM 00258	LOCALE DI MILAZZO	1978	Italy	INRAE	Aubergine	Solanum		melongena		NO	YES
MM 00261	VEDETTE	1978	Netherlands	ZWAAN KLEEVE PANNEVIS	Aubergine	Solanum		melongena	Advanced or improved cultivar	NO	YES
MM 00262	X1	1978	China	INRAE	Aubergine	Solanum		melongena		NO	YES
MM 00263	X2	1978	China	INRAE	Aubergine	Solanum		melongena		NO	YES
MM 00264	Nameless	1978	Nepal	Private individual	Aubergine	Solanum	SOLANUM	NIGRUM AGG.	Wild	NO	NO
MM 00265	Nameless	1978	Nepal	Private individual	Aubergine	Solanum	LEPTOSTEMONUM	VIRGINIANUM L.	Wild	NO	NO
MM 00266	Nameless	1978	Nepal	Private individual	Aubergine	Solanum	LEPTOSTEMONUM	VIARUM DUNAL	Wild	NO	NO
MM 00267	DJACKATTOUS, KHOLINIE	1978	Mauritania	DE BON-I.R.A.T.	Aubergine	Solanum	LEPTOSTEMONUM	AETHIOPICUM L. GR. KUMBA		NO	NO
MM 00268	DJACKATTOUS	1978	Mauritania	DE BON-I.R.A.T.	Aubergine	Solanum	LEPTOSTEMONUM	MACROCARPON L.		NO	YES
MM 00270	ARANGUEZ 4	1979	Trinidad and Tobago	INRAE	Aubergine	Solanum		melongena		NO	YES
MM 00271	MADININA (L17)	1979	Martinique	DALY-I.R.A.T.	Aubergine	Solanum		melongena		NO	NO
MM 00272	KALENDA	1979	Guadeloupe	INRAE	Aubergine	Solanum		melongena		NO	NO
MM 00276	PUSA PURPLE CLUSTER (SM 77524)	1979	UNKNOWN	INRAE	Aubergine	Solanum		melongena		NO	NO
MM 00277	LAMENTIN 2	1979	Martinique	INRAE	Aubergine	Solanum		melongena		YES	YES
MM 00278	LAMENTIN 3	1979	Martinique	INRAE	Aubergine	Solanum		melongena		YES	YES
MM 00280	(SM 75522) / 72-4-W-404	1979	Guadeloupe	INRAE	Aubergine	Solanum		melongena		NO	YES
MM 00281	(SM 77523) / 74-11-4-64-438	1979	Guadeloupe	INRAE	Aubergine	Solanum		melongena		YES	YES
MM 00282	SANGALCAM	1979	China	INRAE	Aubergine	Solanum		melongena		NO	YES
MM 00283	K 2350/BOT16	1979	Uganda	DIKII-INST. VAVILOV	Aubergine	Solanum	LEPTOSTEMONUM	AETHIOPICUM L. GR. GILO		NO	YES
MM 00284	K 2390	1979	Hungary	DIKII-INST. VAVILOV	Aubergine	Solanum	LEPTOSTEMONUM	SISYMBRIFOLIUM LAM.	Wild	NO	YES
MM 00285	Nameless	1979	Togo	INRAE	Aubergine	Solanum	LEPTOSTEMONUM	AETHIOPICUM L. GR. GILO		NO	YES
MM 00287	Nameless	1979	Togo	INRAE	Aubergine	Solanum	LEPTOSTEMONUM	AETHIOPICUM L. GR. GILO		NO	NO
MM 00288	Nameless	1979	Togo	INRAE	Aubergine	Solanum	LEPTOSTEMONUM	AETHIOPICUM L. GR. GILO		NO	NO
MM 00288 BIS	Nameless	1979	Togo	INRAE	Aubergine	Solanum	LEPTOSTEMONUM	AETHIOPICUM L. GR. GILO		NO	YES
MM 00290	PLANTE AUX OEUFS	1980	UNKNOWN	S.E.D.A.O.	Aubergine	Solanum	LEPTOSTEMONUM	OVIGERUM DUNAL		NO	YES
MM 00299	VIOLETTE NOIRE D'ORIENT	1980	France	RIVOIRE SEMENCES	Aubergine	Solanum		melongena		NO	YES
MM 00300	NOIRE LONGUE DE BARBENTANE	1980	France	Private individual	Aubergine	Solanum		melongena	Advanced or improved cultivar	NO	YES
MM 00301	LUNGA VIOLETTA DI RIMINI	1980	Italy	CLAUSE SEMENCES	Aubergine	Solanum		melongena		NO	YES
MM 00302	BERENGENA LARGA NEGRA 2	1980	Spain	FITO	Aubergine	Solanum		melongena	Advanced or improved cultivar	NO	YES
MM 00303	BERENJENA SEMI REDONDA NEGRA	1980	Spain	FITO	Aubergine	Solanum		melongena	Advanced or improved cultivar	NO	YES
MM 00304	MAMMOUTH	1980	Netherlands	VAN DEN BERG	Aubergine	Solanum		melongena		NO	YES
MM 00305	BARI	1980	Netherlands	SLUIS & GROOT	Aubergine	Solanum		melongena	Advanced or improved cultivar	NO	YES
MM 00306	LONG PURPLE 2	1980	United Kingdom of Great Britain and Northern Ireland	ASMER SEEDS	Aubergine	Solanum		melongena		NO	YES
MM 00307	BLACK BEAUTY 2	1980	United States of America	PETOSEED	Aubergine	Solanum		melongena	Advanced or improved cultivar	NO	YES
MM 00308	BLACK BEAUTY	1980	France	IPB	Aubergine	Solanum		melongena		NO	NO
MM 00309	IMPERIAL BLACK BEAUTY	1980	Canada	STOKES SEEDS	Aubergine	Solanum		melongena		NO	NO
MM 00310	FLORIDA MARKET	1980	United States of America	PETOSEED	Aubergine	Solanum		melongena	Advanced or improved cultivar	YES	YES
MM 00319	MONEYMAKER	1980	UNKNOWN	KARL HILD	Aubergine	Solanum		melongena		NO	YES
MM 00325	ICHIBAN	1980	United States of America	PETOSEED	Aubergine	Solanum		melongena		NO	YES
MM 00329	LONG BLACK NAGAOKA (F1) (1)	1980	Japan	TAKII SEED	Aubergine	Solanum		melongena	Breeder's material	NO	YES
MM 00329 BIS	LONG BLACK NAGAOKA (F1) (2)	UNKNOWN	Japan	TAKII SEED	Aubergine	Solanum		melongena		NO	YES
MM 00330	MILLIONNAIRE [F1] 2	1980	Netherlands	BAKKER POUR LE JARDIN	Aubergine	Solanum		melongena		YES	YES
MM 00342	ESTELLE	1978	France	CAILLARD SEMENCE	Aubergine	Solanum		melongena		NO	NO
MM 00344	ROYAL KNIGHT	1979	Australia	YATES	Aubergine	Solanum		melongena	Advanced or improved cultivar	NO	YES
MM 00345	Berengena larga 1	1980	Spain	BATTLE SEMILLAS	Aubergine	Solanum		melongena		NO	YES
MM 00346	BERENGENA REDONDA	1980	Spain	BATTLE SEMILLAS	Aubergine	Solanum		melongena		NO	YES
MM 00347	S. DU CONGO	1980	Congo	INRAE	Aubergine	Solanum	LEPTOSTEMONUM	AETHIOPICUM L. GR. SHUM		NO	NO
MM 00347 BIS	S. DU CONGO	1980	Congo	INRAE	Aubergine	Solanum	LEPTOSTEMONUM	AETHIOPICUM L. GR. SHUM		NO	NO
MM 00348	N'DROWA 1	1980	Côte d'Ivoire	INRAE	Aubergine	Solanum	LEPTOSTEMONUM	AETHIOPICUM L. GR. GILO		NO	YES
MM 00349	DONSKOY 14	1980	Russian Federation	INST. VAVILOV	Aubergine	Solanum		melongena		NO	NO
MM 00350	DLINNYJ FIOLETOVIJ	1980	Ukraine	INST. VAVILOV	Aubergine	Solanum		melongena		NO	NO
MM 00350 BIS	DLINNYJ FIOLETOVIJ	1980	Ukraine	INST. VAVILOV	Aubergine	Solanum		melongena		NO	NO
MM 00351	EREVANSKIJ 3	1980	Armenia	INST. VAVILOV	Aubergine	Solanum		melongena		NO	YES
MM 00352	UNIVERSAL 6 (2)	1980	Russian Federation	INST. VAVILOV	Aubergine	Solanum		melongena		NO	YES
MM 00352 BIS	UNIVERSAL 6	1980	Russian Federation	INST. VAVILOV	Aubergine	Solanum		melongena		NO	NO
MM 00353	S. TORVUM GUADELOUPE	1980	Guadeloupe	INRAE	Aubergine	Solanum	LEPTOSTEMONUM	TORVUM SW.	Wild	NO	NO
MM 00355	LIU YE CHIE (A 6 FEUILLES)	1980	China	INRAE	Aubergine	Solanum		melongena		NO	YES
MM 00356	JIO YE CHIE (A 9 FEUILLES)	1980	China	INRAE	Aubergine	Solanum		melongena		NO	YES
MM 00357	AN TA [F1] (1)	1980	China	INRAE	Aubergine	Solanum		melongena	Advanced or improved cultivar	NO	YES
MM 00357 BIS	AN TA [F1] (2)	1980	China	INRAE	Aubergine	Solanum		melongena	Advanced or improved cultivar	NO	YES
MM 00357 TER	AN TA	1980	China	INRAE	Aubergine	Solanum		melongena	Advanced or improved cultivar	NO	YES
MM 00359	XUZHOUCHANG (LONGUE DE XUZHOU) 2	1980	China	INRAE	Aubergine	Solanum		melongena		NO	YES
MM 00359 BIS	XUZHOUCHANG (LONGUE DE XUZHOU) 1	1980	China	INRAE	Aubergine	Solanum		melongena		NO	YES
MM 00360	KEXUAN N°1	1980	China	INRAE	Aubergine	Solanum		melongena		NO	YES
MM 00361	LONG ZHA N°1	1980	China	INRAE	Aubergine	Solanum		melongena		NO	NO
MM 00361 BIS	LONG ZHA N°1	1980	China	INRAE	Aubergine	Solanum		melongena		NO	NO
MM 00361 TER	LONG ZHA N°1	1980	China	INRAE	Aubergine	Solanum		melongena		NO	NO
MM 00362	Nameless	1980	UNKNOWN	CAILLARD SEMENCE	Aubergine	Solanum	LEPTOSTEMONUM	AETHIOPICUM L. GR. GILO		NO	NO
MM 00363	DONTZKII UROJAINII	1980	Russian Federation	INRAE	Aubergine	Solanum		melongena		NO	YES
MM 00364	NEJII	1980	Republic of Moldova	INRAE	Aubergine	Solanum		melongena		NO	YES
MM 00365	DNESTROVEC	1980	Republic of Moldova	INRAE	Aubergine	Solanum		melongena		NO	YES
MM 00366	SKOROSPELYI	1980	Uzbekistan	INRAE	Aubergine	Solanum		melongena		NO	YES
MM 00367	JUBILEYI	1980	Russian Federation	INRAE	Aubergine	Solanum		melongena		NO	YES
MM 00368	43	1980	Armenia	INRAE	Aubergine	Solanum		melongena		NO	YES
MM 00369	Nameless	1980	UNKNOWN	JARDIN BOTANIQUE-ANTIBES	Aubergine	Solanum	LEPTOSTEMONUM	ACULEATISSIMUM JACQ.	Wild	NO	YES
MM 00370	Nameless	1980	UNKNOWN	JARDIN BOTANIQUE-ANTIBES	Aubergine	Solanum	ARCHAESOLANUM	LACINIATUM AIT.	Wild	NO	NO
MM 00372	REINE DE SABBAT	1980	France	ONILLON-INRAE	Aubergine	Solanum		melongena	Advanced or improved cultivar	YES	YES
MM 00373	Nameless	1980	Sierra Leone	INRAE	Aubergine	Solanum	SOLANUM	SCABRUM MILL.	Wild	NO	NO
MM 00374	Nameless	1981	Nepal	INRAE	Aubergine	Solanum	LEPTOSTEMONUM	VIARUM DUNAL	Wild	NO	YES
MM 00376	S. THEKHADY	1981	India	INRAE	Aubergine	Solanum	LEPTOSTEMONUM	CAPSICOIDES ALL.	Wild	NO	NO
MM 00377	AUB. TRIVANDRUM	1981	India	INRAE	Aubergine	Solanum		melongena		NO	YES
MM 00378	AUB. KANYAKUMARI	1981	India	INRAE	Aubergine	Solanum		melongena		NO	YES
MM 00379	BRINJAL CLUSTER LONG	1981	India	INRAE	Aubergine	Solanum		melongena		NO	YES
MM 00380 A	ROUND WHITE CLUSTER	1981	India	INRAE	Aubergine	Solanum		melongena		NO	YES
MM 00380 B	ROUND PURPLE	1981	India	INRAE	Aubergine	Solanum		melongena		NO	YES
MM 00380 C	WHITE EGG CLUSTER 1	1981	India	INRAE	Aubergine	Solanum		melongena		NO	YES
MM 00380 D	WHITE EGG CLUSTER 2	1981	India	INRAE	Aubergine	Solanum		melongena		NO	YES
MM 00380 E	ROUND GREEN CLUSTER	1981	India	INRAE	Aubergine	Solanum		melongena		NO	YES
MM 00380 F	OBLONG MAUVE	1981	India	INRAE	Aubergine	Solanum		melongena		NO	YES
MM 00381	SUPHAL	1981	India	INRAE	Aubergine	Solanum		melongena		NO	YES
MM 00382	PUSA KRANTA	1981	India	INRAE	Aubergine	Solanum		melongena		NO	YES
MM 00383	PURPLE ROUND	1981	India	INRAE	Aubergine	Solanum		melongena		NO	YES
MM 00384	MAL NOMMEE "ROUND BEAUTY BLACK"	1981	India	INRAE	Aubergine	Solanum		melongena		NO	NO
MM 00384 BIS	MAL NOMMEE " ROUND BEAUTY BLACK"	1981	India	INRAE	Aubergine	Solanum		melongena		NO	NO
MM 00385	LARGE ROUND	1981	India	INRAE	Aubergine	Solanum		melongena		NO	YES
MM 00386	MISNAMED "LONG WHITE CLUSTER"	1981	India	INRAE	Aubergine	Solanum		melongena		NO	YES
MM 00387	PUSA PURPLE LONG 1	1981	India	INRAE	Aubergine	Solanum		melongena		NO	YES
MM 00388	PUSA PURPLE ROUND	1981	India	INRAE	Aubergine	Solanum		melongena		NO	YES
MM 00389	BRINJAL MUKTAKESHI	1981	India	INRAE	Aubergine	Solanum		melongena		NO	YES
MM 00390	M'RAISSA	1981	Tunisia	INRAE	Aubergine	Solanum	LEPTOSTEMONUM	LINNAEANUM HEPPER & JAEGER	Wild	NO	NO
MM 00392	S. TORVUM AFRIQUE 2 A 3 ANS D'AGE	1981	Unknown	INRAE	Aubergine	Solanum	LEPTOSTEMONUM	TORVUM SW.	Wild	NO	YES
MM 00393	EPINES COURTES	1981	Togo	INRAE	Aubergine	Solanum	LEPTOSTEMONUM	ANGUIVI AGG.	Wild	NO	NO
MM 00393 BIS	EPINES COURTES	1981	Togo	INRAE	Aubergine	Solanum	LEPTOSTEMONUM	ANGUIVI AGG.	Wild	NO	NO
MM 00394	PAS D'EPINES	1981	Togo	INRAE	Aubergine	Solanum	LEPTOSTEMONUM	ANGUIVI AGG.	Wild	NO	NO
MM 00395	Nameless	1981	Togo	INRAE	Aubergine	Solanum	LEPTOSTEMONUM	AETHIOPICUM L. GR. GILO		NO	NO
MM 00395 BIS	Nameless	1981	Togo	INRAE	Aubergine	Solanum	LEPTOSTEMONUM	AETHIOPICUM L. GR. GILO-ANGUIVI		NO	NO
MM 00396	AUB. INDIENNE TON THAT TRINH	1981	India	TON THAT TRINH-I.R.A.T.	Aubergine	Solanum		melongena		NO	YES
MM 00398	THAILAD	1981	Thailand	INRAE	Aubergine	Solanum		melongena		NO	YES
MM 00400	LONG GREEN	1981	Thailand	INRAE	Aubergine	Solanum		melongena		NO	NO
MM 00401	AUB. A CONFITURE	1982	France	Private individual	Aubergine	Solanum		melongena		YES	YES
MM 00402	S. ALLIOT	1982	France	INRAE	Aubergine	Solanum	ARCHAESOLANUM	LACINIATUM AIT.	Wild	NO	NO
MM 00403	LONG PURPLE 3	1982	France	IPB	Aubergine	Solanum		melongena	Advanced or improved cultivar	NO	YES
MM 00405	TONDA BIANCA SFUMATA DI ROSA	1982	Italy	SGARAVATTI	Aubergine	Solanum		melongena		NO	YES
MM 00406	LUNGA VIOLETTA	1982	Italy	SGARAVATTI	Aubergine	Solanum		melongena		NO	YES
MM 00407	TONDA VIOLETTA DI FIRENZE	1982	Italy	SGARAVATTI	Aubergine	Solanum		melongena		NO	YES
MM 00409	TONDA VIOLETTA DI NEW YORK	1982	Italy	ZORZI SEMENTI	Aubergine	Solanum		melongena		NO	YES
MM 00410	LUNGA VIOLETTA SCURA CANNELLINA	1982	Italy	ZORZI SEMENTI	Aubergine	Solanum		melongena		NO	YES
MM 00411	LUNGA VIOLETTA DI NAPOLI	1982	Italy	ZORZI PADOVA	Aubergine	Solanum		melongena		NO	YES
MM 00412	TAIWAN NAGA 1	1982	Japan	YAMAKAWA-VEG. AND ORNAMENT. CROPS RES. ST.	Aubergine	Solanum		melongena		NO	YES
MM 00413	N°1	1982	Malaysia	YAMAKAWA-VEG. AND ORNAMENT. CROPS RES. ST.	Aubergine	Solanum		melongena		NO	YES
MM 00414	MAKILING	1982	Philippines	YAMAKAWA-VEG. AND ORNAMENT. CROPS RES. ST.	Aubergine	Solanum		melongena		NO	YES
MM 00415	MAYON	1982	Philippines	YAMAKAWA-VEG. AND ORNAMENT. CROPS RES. ST.	Aubergine	Solanum		melongena		NO	NO
MM 00416	Nameless	1982	Japan	YAMAKAWA-VEG. AND ORNAMENT. CROPS RES. ST.	Aubergine	Solanum	LEPTOSTEMONUM	STRAMONIFOLIUM JACQ.	Wild	NO	NO
MM 00417	VIOLETTA SCURA LUNGA PRECOCISSIMA	1982	Italy	TEZIER SEMENCES	Aubergine	Solanum		melongena		NO	YES
MM 00419	LUNGA MARINA	1982	Italy	TEZIER SEMENCES	Aubergine	Solanum		melongena	Advanced or improved cultivar	NO	YES
MM 00420	SMALL FRUITED LONG TOM	1982	Japan	SAKATA SEEDS	Aubergine	Solanum		melongena		NO	YES
MM 00425	SMALL FRUITED SHORT TOM	1982	Japan	SAKATA SEEDS	Aubergine	Solanum		melongena		NO	YES
MM 00426	WHITE N°78193	1982	Thailand	PET-I.V.T.	Aubergine	Solanum		melongena		NO	YES
MM 00427	VEDETTE X WHITE/ (N°80335)	1982	UNKNOWN	PET-I.V.T.	Aubergine	Solanum		melongena		NO	YES
MM 00428	SUZUNAI X WHITE/ (N°80339)	1982	UNKNOWN	PET-I.V.T.	Aubergine	Solanum		melongena		NO	YES
MM 00430	BEAUTE AFRICAINE = BLACK BEAUTY	1982	Canada	LAVAL SEMENCES	Aubergine	Solanum		melongena	Advanced or improved cultivar	NO	YES
MM 00431	NEW YORK PURPLE	1982	United Kingdom of Great Britain and Northern Ireland	SHARPE	Aubergine	Solanum		melongena	Advanced or improved cultivar	NO	YES
MM 00434	EASTER EGG	1982	United States of America	BALL SEED	Aubergine	Solanum		melongena		NO	YES
MM 00436	SLIM JIM	1982	United States of America	BALL SEED	Aubergine	Solanum		melongena		NO	YES
MM 00438	468 SPECIAL HIBUSH	1982	United States of America	HARRIS SEEDS	Aubergine	Solanum		melongena		NO	YES
MM 00443	POMPANO MARKET	1982	United States of America	KEYSTONE	Aubergine	Solanum		melongena	Advanced or improved cultivar	NO	YES
MM 00444	EARLY PURPLE ITALIAN	1982	United States of America	FERRY MORSE	Aubergine	Solanum		melongena	Advanced or improved cultivar	NO	YES
MM 00445	FLORIDA MARKET 3	1982	United States of America	DESSERT	Aubergine	Solanum		melongena	Advanced or improved cultivar	YES	YES
MM 00448	Nameless	1982	France	INRAE	Aubergine	Solanum	LEPTOSTEMONUM	HISPIDUM PER	Wild	NO	NO
MM 00449	Nameless	1982	Mauritania	H. de BON Canada-CIRAD	Aubergine	Solanum		descendance interspécifique	Interspecific cross	NO	NO
MM 00450	S. TORVUM REUNION	1982	Réunion	GIRARD-I.R.A.T.	Aubergine	Solanum	LEPTOSTEMONUM	TORVUM SW.	Wild	NO	NO
MM 00451	RMP 9B P5E	1982	Tunisia	Mr HAMZA, Inst. Nat. Rech. Agron. Tunisie	Aubergine	Solanum		descendance interspécifique	Interspecific cross	NO	NO
MM 00452	RM2 P9C P2D	1982	Tunisia	Mr HAMZA, Inst. Nat. Rech. Agron. de Tunisie	Aubergine	Solanum		descendance interspécifique	Interspecific cross	NO	NO
MM 00453	RM2 P9C P2B	1982	Tunisia	Mr HAMZA, Inst. Nat. Rech. Agron. Tunisie	Aubergine	Solanum		descendance interspécifique	Interspecific cross	NO	NO
MM 00455	TAIBYO VF NASU	1982	Japan	K. Yamakawa, Veg. and Ornament. Crops Res. Inst., Ano Mie, Japon	Aubergine	Solanum		descendance interspécifique	Hybrid	NO	NO
MM 00456	S. TORVUM JAPON	1982	Japan	YAMAKAWA-VEG. AND ORNAMENT. CROPS RES. ST.	Aubergine	Solanum	LEPTOSTEMONUM	TORVUM SW.	Wild	NO	NO
MM 00457	Nameless	1982	Japan	YAMAKAWA-VEG. AND ORNAMENT. CROPS RES. ST.	Aubergine	Solanum	LEPTOSTEMONUM	AETHIOPICUM L. GR. ACULEATUM		NO	NO
MM 00458	Nameless	1982	Japan	YAMAKAWA-VEG. AND ORNAMENT. CROPS RES. ST.	Aubergine	Solanum	LEPTOSTEMONUM	AETHIOPICUM L. GR. GILO		NO	YES
MM 00459	PUSA PURPLE CLUSTER	1982	India	CHATTERJEE-IND. AGRIC. RES. INST.-NEW DELHI	Aubergine	Solanum		melongena		NO	YES
MM 00462	PRECOCE SICILIANA	1983	Italy	OLTER SEMENTI	Aubergine	Solanum		melongena		NO	YES
MM 00464	IRENE 220	1983	Italy	OLTER SEMENTI	Aubergine	Solanum		melongena		NO	NO
MM 00465	PROSPERA	1983	Italy	OLTER SEMENTI	Aubergine	Solanum		melongena		NO	YES
MM 00466	KURUME LONG	1983	Japan	SAKATA SEEDS	Aubergine	Solanum		melongena		NO	YES
MM 00467	EARLY PURPLE EGG	1983	Japan	SAKATA SEEDS	Aubergine	Solanum		melongena		NO	YES
MM 00477	LOCAL	1983	Nepal	INST. VAVILOV	Aubergine	Solanum		melongena		NO	YES
MM 00477 BIS	LOCAL	1983	Nepal	INST. VAVILOV	Aubergine	Solanum		melongena		NO	YES
MM 00478	SIMFEROPOLSKIJ 105	1983	Ukraine	INST. VAVILOV	Aubergine	Solanum		melongena		NO	YES
MM 00479	RANNIJE 1	1983	Ukraine	INST. VAVILOV	Aubergine	Solanum		melongena		NO	YES
MM 00479 BIS	RANNIJE 2	1983	Ukraine	INST. VAVILOV	Aubergine	Solanum		melongena		NO	YES
MM 00480	STOJKIJ 740	1983	Russian Federation	INST. VAVILOV	Aubergine	Solanum		melongena		NO	YES
MM 00481	SADOHARE NAGANASU	1983	Japan	INST. VAVILOV	Aubergine	Solanum		melongena		NO	YES
MM 00489	Porcelaine verte zébrée de violet	1983	Guadeloupe	INRAE	Aubergine	Solanum		melongena		YES	YES
MM 00490	Nameless	1983	France	Private individual	Aubergine	Solanum	ARCHAESOLANUM	LACINIATUM AIT.	Wild	NO	NO
MM 00491	RH2 P9B P3E P4	1983	Tunisia	UNKNOWN	Aubergine	Solanum		descendance interspécifique	Interspecific cross	NO	NO
MM 00492	RH2 P9B P5C P2	1983	Tunisia	Mr HAMZA, Inst. Nat. Rech. Agron. Tunisie	Aubergine	Solanum		descendance interspécifique	Interspecific cross	NO	NO
MM 00493	RH2 P9C P4B P4	1983	Tunisia	Mr HAMZA, Inst. Nat. Rech. Agron. Tunisie	Aubergine	Solanum		descendance interspécifique	Interspecific cross	NO	NO
MM 00494	RP6 P13A P2C P5	1983	Tunisia	Mr HAMZA, Inst. Nat. Rech. Agron. Tunisie	Aubergine	Solanum		descendance interspécifique	Interspecific cross	NO	NO
MM 00495	RP6 P13A P4B P1	1983	Tunisia	Mr HAMZA, Inst. Nat. Rech. Agron. Tunisie	Aubergine	Solanum		descendance interspécifique	Interspecific cross	NO	NO
MM 00496	RP6 P13A P4C P1	1983	Tunisia	Mr HAMZA, Inst. Nat. Rech. Agron. Tunisie	Aubergine	Solanum		descendance interspécifique	Interspecific cross	NO	NO
MM 00497	(T3J)	1983	Japan	INRAE	Aubergine	Solanum	LEPTOSTEMONUM	VIOLACEUM ORT.	Wild	NO	YES
MM 00498	(LS 174)	1983	Japan	INRAE	Aubergine	Solanum	LEPTOSTEMONUM	MELONGENA L. (GROUPE E)	Wild	NO	NO
MM 00498 BIS	(LS 174)	1983	Japan	INRAE	Aubergine	Solanum	LEPTOSTEMONUM	MELONGENA L. (GROUPE E)	Wild	NO	NO
MM 00500	ZEBRINA LONGUE	1983	Guadeloupe	Private individual	Aubergine	Solanum		melongena		YES	YES
MM 00501	ZEBRINA RONDE	1983	Guadeloupe	Private individual	Aubergine	Solanum		melongena		YES	YES
MM 00502	T3 ROUND	1983	India	IND. AGRIC. RES. INST.	Aubergine	Solanum		melongena		NO	YES
MM 00502 BIS	T3 ROUND	1983	India	IND. AGRIC. RES. INST.	Aubergine	Solanum		melongena		NO	NO
MM 00503	QIE ZI (A)	1983	China	INRAE	Aubergine	Solanum		melongena		NO	YES
MM 00508	ADONIS	1983	Bulgaria	INST. GENET.	Aubergine	Solanum		melongena		NO	YES
MM 00509	Nameless	1983	UNKNOWN	GEORGIEV-INST. DE GENETIQUE DE SOFIA	Aubergine	Solanum	ARCHAESOLANUM	LACINIATUM AIT.	Wild	NO	NO
MM 00510	Nameless	1984	India	RESTAINO-IST. SPERIM. PER L'ORTIC.	Aubergine	Solanum	LEPTOSTEMONUM	MELONGENA L. (GROUPE E)	Wild	NO	NO
MM 00511	Nameless	1984	India	RESTAINO-IST. SPERIM. PER L'ORTIC.	Aubergine	Solanum	LEPTOSTEMONUM	VIRGINIANUM L.	Wild	NO	YES
MM 00512	Nameless	1984	India	RESTAINO-IST. SPERIM. PER L'ORTIC.	Aubergine	Solanum	LEPTOSTEMONUM	VIRGINIANUM L.	Wild	NO	NO
MM 00513	PICENTIA	1984	Italy	RESTAINO-IST. SPERIM. PER L'ORTIC.	Aubergine	Solanum		melongena		NO	YES
MM 00514	FLORALBA	1984	Italy	RESTAINO-IST. SPERIM. PER L'ORTIC.	Aubergine	Solanum		melongena		NO	YES
MM 00515	L 19/75	1984	Italy	RESTAINO-IST. SPERIM. PER L'ORTIC.	Aubergine	Solanum		melongena		NO	YES
MM 00516	L 35/76	1984	Italy	RESTAINO-IST. SPERIM. PER L'ORTIC.	Aubergine	Solanum		melongena		NO	YES
MM 00517	L 15/78	1984	Italy	RESTAINO-IST. SPERIM. PER L'ORTIC.	Aubergine	Solanum		melongena		NO	YES
MM 00518	FING YUON PURPLE	1984	China	RESTAINO-IST. SPERIM. PER L'ORTIC.	Aubergine	Solanum		melongena		NO	YES
MM 00519	PINGTUNG	1984	China	RESTAINO-IST. SPERIM. PER L'ORTIC.	Aubergine	Solanum		melongena		NO	YES
MM 00522	WAIMANALO LONG B1	1984	United States of America	IST. DI AGRON. GEN. E COLTIV. ERB.	Aubergine	Solanum		melongena		NO	YES
MM 00523	TONDA PUGLIESE	1984	Italy	IST. DI AGRON. GEN. E COLTIV. ERB.	Aubergine	Solanum		melongena	Advanced or improved cultivar	NO	YES
MM 00526	GIGANTE L 38	1984	Italy	IST. DI AGRON. GEN. E COLTIV. ERB.	Aubergine	Solanum		melongena		NO	YES
MM 00533	PI 351129	1984	Japan	IST. DI AGRON. GEN. E COLTIV. ERB.	Aubergine	Solanum		melongena		NO	YES
MM 00534	PI 350320	1984	Philippines	IST. DI AGRON. GEN. E COLTIV. ERB.	Aubergine	Solanum		melongena		NO	YES
MM 00534 BIS	PI 350320	1984	Philippines	IST. DI AGRON. GEN. E COLTIV. ERB.	Aubergine	Solanum		melongena		NO	NO
MM 00536	6817 PS/V	1984	France	IST. DI AGRON. GEN. E COLTIV. ERB.	Aubergine	Solanum		melongena	Advanced or improved cultivar	NO	YES
MM 00539	MANISA SYAHI 75P/1	1984	Turkey	IST. DI AGRON. GEN. E COLTIV. ERB.	Aubergine	Solanum		melongena		NO	YES
MM 00540	VIOLETTA DI NAPOLI 1 M41	1984	Italy	IST. DI AGRON. GEN. E COLTIV. ERB.	Aubergine	Solanum		melongena	Traditional cultivar	NO	YES
MM 00540 BIS	VIOLETTA DI NAPOLI 1 M41	1984	Italy	IST. DI AGRON. GEN. E COLTIV. ERB.	Aubergine	Solanum		melongena	Traditional cultivar	NO	YES
MM 00541	LUNGA	1984	Italy	IST. DI AGRON. GEN. E COLTIV. ERB.	Aubergine	Solanum		melongena		NO	YES
MM 00542	MEL 2	1984	Italy	IST. DI AGRON. GEN. E COLTIV. ERB.	Aubergine	Solanum		melongena		NO	YES
MM 00548	5245 ITALIE C	1984	Italy	IST. DI AGRON. GEN. E COLTIV. ERB.	Aubergine	Solanum		melongena		NO	YES
MM 00551	5241 ITALIE F	1984	Italy	IST. DI AGRON. GEN. E COLTIV. ERB.	Aubergine	Solanum		melongena		NO	YES
MM 00552	5242 ITALIE G (TYPE PUSA PURPLE CLUSTER)	1984	Italy	IST. DI AGRON. GEN. E COLTIV. ERB.	Aubergine	Solanum		melongena		NO	YES
MM 00554	TONDA SFUMATA DI VIOLA LOTTO 175	1984	Italy	IST. DI AGRON. GEN. E COLTIV. ERB.	Aubergine	Solanum		melongena		NO	YES
MM 00555	TONDA SFUMATA DI VIOLA LOTTO 300	1984	Italy	IST. DI AGRON. GEN. E COLTIV. ERB.	Aubergine	Solanum		melongena		NO	NO
MM 00556	LUNGA NERA LOTTO 400	1984	Italy	IST. DI AGRON. GEN. E COLTIV. ERB.	Aubergine	Solanum		melongena		NO	YES
MM 00557	INGEGNOLI 54	1984	Italy	IST. DI AGRON. GEN. E COLTIV. ERB.	Aubergine	Solanum		melongena		NO	NO
MM 00557 BIS	INGEGNOLI 54	1984	Italy	IST. DI AGRON. GEN. E COLTIV. ERB.	Aubergine	Solanum		melongena		NO	NO
MM 00557 QUATER	INGEGNOLI 54	1984	Italy	IST. DI AGRON. GEN. E COLTIV. ERB.	Aubergine	Solanum		melongena		NO	NO
MM 00558	INGEGNOLI 53	1984	Italy	IST. DI AGRON. GEN. E COLTIV. ERB.	Aubergine	Solanum		melongena		NO	YES
MM 00559	5506 ITALIE H	1984	Italy	IST. DI AGRON. GEN. E COLTIV. ERB.	Aubergine	Solanum		melongena	Breeder's material	NO	YES
MM 00560	5248	1984	Italy	IST. DI AGRON. GEN. E COLTIV. ERB.	Aubergine	Solanum		melongena	Advanced or improved cultivar	NO	YES
MM 00563	LUNGA VIOLETTA DI ROMAGNA	1984	Italy	IST. DI AGRON. GEN. E COLTIV. ERB.	Aubergine	Solanum		melongena		NO	YES
MM 00564	(USDA PI 308 877)	1984	India	LOISELLE-CENTR. OFFICE FOR PLANT GENE RESSOUR.-OTTAWA	Aubergine	Solanum	LEPTOSTEMONUM	VIARUM DUNAL	Wild	NO	NO
MM 00566	(USDA PI 331 140)	1984	Uruguay	LOISELLE-CENTR. OFFICE FOR PLANT GENE RESSOUR.-OTTAWA	Aubergine	Solanum	LEPTOSTEMONUM	SISYMBRIFOLIUM LAM.	Wild	NO	NO
MM 00567	(USDA PI 337 597)	1984	Argentina	LOISELLE-CENTR. OFFICE FOR PLANT GENE RESSOUR.-OTTAWA	Aubergine	Solanum	LEPTOSTEMONUM	SISYMBRIFOLIUM LAM.	Wild	NO	NO
MM 00568	(USDA PI 381 291)	1984	India	LOISELLE-CENTR. OFFICE FOR PLANT GENE RESSOUR.-OTTAWA	Aubergine	Solanum	LEPTOSTEMONUM	SISYMBRIFOLIUM LAM.	Wild	NO	NO
MM 00569	(USDA PI 358 311)	1984	India	LOISELLE-CENTR. OFFICE FOR PLANT GENE RESSOUR.-OTTAWA	Aubergine	Solanum	LEPTOSTEMONUM	SISYMBRIFOLIUM LAM.	Wild	NO	NO
MM 00569 BIS	(USDA PI 358 311)	1984	India	LOISELLE-CENTR. OFFICE FOR PLANT GENE RESSOUR.-OTTAWA	Aubergine	Solanum	LEPTOSTEMONUM	SISYMBRIFOLIUM LAM.	Wild	NO	NO
MM 00570	(USDA PI 280 049)	1984	United States of America	LOISELLE-CENTR. OFFICE FOR PLANT GENE RESSOUR.-OTTAWA	Aubergine	Solanum	ARCHAESOLANUM	AVICULARE FORST.	Wild	NO	NO
MM 00571	(USDA PI 194 166)	1984	Serbia	LOISELLE-CENTR. OFFICE FOR PLANT GENE RESSOUR.-OTTAWA	Aubergine	Solanum	LEPTOSTEMONUM	AETHIOPICUM L. GR. GILO		NO	NO
MM 00572	(USDA PI 183 949)	1984	India	LOISELLE-CENTR. OFFICE FOR PLANT GENE RESSOUR.-OTTAWA	Aubergine	Solanum	LEPTOSTEMONUM	VIARUM DUNAL	Wild	NO	NO
MM 00573	Nameless	1984	Réunion	INRAE	Aubergine	Solanum	MINON	MAURITIANUM SCOP. (=AURICULATUM)	Wild	NO	NO
MM 00574	JAXATU VAR. SOXNA	1984	Senegal	C.D.H.	Aubergine	Solanum	LEPTOSTEMONUM	AETHIOPICUM L. GR. KUMBA		NO	YES
MM 00576	Nameless	1984	Italy	RESTAINO-IST. SPERIM. PER L'ORTIC.	Aubergine	Solanum	LEPTOSTEMONUM	LINNAEANUM HEPPER & JAEGER	Wild	NO	NO
MM 00577	Nameless	1984	Israel	NOTHMANN	Aubergine	Solanum	LEPTOSTEMONUM	INCANUM L. (GROUPE C)	Wild	NO	YES
MM 00578 A	(USDA PI 381 155)	1984	India	WHITE-U.S.D.A.	Aubergine	Solanum	LEPTOSTEMONUM	MELONGENA L. (GROUPE H)		NO	NO
MM 00578 B	(USDA PI 381 155)	1984	India	WHITE-U.S.D.A.	Aubergine	Solanum	LEPTOSTEMONUM	MELONGENA L. (GROUPE H)		NO	NO
MM 00578 C	(USDA PI 381 155)	1984	India	WHITE-U.S.D.A.	Aubergine	Solanum	LEPTOSTEMONUM	MELONGENA L. (GROUPE H)		NO	NO
MM 00578 D	N░ 390211	1984	India	WHITE-U.S.D.A.	Aubergine	Solanum	LEPTOSTEMONUM	MELONGENA L. (GROUPE H)		NO	NO
MM 00578 E	(PI 381 155)	1984	India	WHITE-U.S.D.A.	Aubergine	Solanum	LEPTOSTEMONUM	MELONGENA L. (GROUPE H)		NO	NO
MM 00579	N░ 390211	1984	India	WHITE-U.S.D.A.	Aubergine	Solanum	LEPTOSTEMONUM	MELONGENA L. (GROUPE H)		NO	NO
MM 00579 BIS	N 390211	1984	India	WHITE-U.S.D.A.	Aubergine	Solanum	LEPTOSTEMONUM	MELONGENA L. (GROUPE H)		NO	NO
MM 00580	(USDA PI 194 789)	1984	India	WHITE-U.S.D.A.	Aubergine	Solanum	LEPTOSTEMONUM	AETHIOPICUM L. GR. GILO		NO	NO
MM 00583	AUB. BENIN VERT	1984	Benin	SECK-C.D.H.	Aubergine	Solanum	LEPTOSTEMONUM	MACROCARPON L.	Traditional cultivar	NO	YES
MM 00585	JAXATU (TAM 88)	1984	Senegal	SECK-C.D.H.	Aubergine	Solanum	LEPTOSTEMONUM	AETHIOPICUM L. GR. KUMBA		NO	NO
MM 00588	LIDIA (H 120)	1984	Romania	I.C.P.L.F.	Aubergine	Solanum		melongena		NO	YES
MM 00590	BUCURESTENE	1984	Romania	I.C.P.L.F.	Aubergine	Solanum		melongena		NO	YES
MM 00591	NARCISA (H 117)	1984	Romania	I.C.P.L.F.	Aubergine	Solanum		melongena		NO	YES
MM 00592	GREEN LANTERN	1984	Cameroon	Private individual	Aubergine	Solanum	LEPTOSTEMONUM	AETHIOPICUM L. GR. GILO		NO	YES
MM 00594	S. MELONGENA 0 "VAR. INSANUM"	1985	India	GOPIMONY-KERALA AGRIC. UNIV.	Aubergine	Solanum		melongena		NO	YES
MM 00595	Nameless	1985	Italy	ABBATE	Aubergine	Solanum	LEPTOSTEMONUM	LINNAEANUM HEPPER & JAEGER	Wild	NO	NO
MM 00596	PALA	1985	Turkey	OZKALE	Aubergine	Solanum		melongena		NO	YES
MM 00597	KEMER 5	1985	Turkey	OZKALE	Aubergine	Solanum		melongena		NO	YES
MM 00598	VOO DOO	1985	United States of America	MORAN SEEDS	Aubergine	Solanum		melongena	Advanced or improved cultivar	NO	YES
MM 00602	Nameless	1984	France	INRAE	Aubergine	Solanum	LEPTOSTEMONUM	LINNAEANUM HEPPER & JAEGER	Wild	NO	NO
MM 00603	KIRIN	1985	Japan	KIRIN SEEDS	Aubergine	Solanum		melongena		NO	YES
MM 00604	Nameless	1985	UNKNOWN	IND. AGRIC. RES. INST.	Aubergine	Solanum	LEPTOSTEMONUM	SISYMBRIFOLIUM LAM.	Wild	NO	NO
MM 00605	Nameless	1985	UNKNOWN	IND. AGRIC. RES. INST.	Aubergine	Solanum	LEPTOSTEMONUM	VIARUM DUNAL	Wild	NO	NO
MM 00606	Nameless	1985	UNKNOWN	IND. AGRIC. RES. INST.	Aubergine	Solanum	LEPTOSTEMONUM	MELONGENA L. (GROUPE H)		NO	NO
MM 00607	PUSA PURPLE CLUSTER ATYPIQUE	1985	India	IND. AGRIC. RES. INST.	Aubergine	Solanum		melongena		NO	YES
MM 00608	BANARAS GIANT	1985	India	IND. AGRIC. RES. INST.	Aubergine	Solanum		melongena		NO	NO
MM 00609	GIANT OF RAM NAGAR	1985	India	IND. AGRIC. RES. INST.	Aubergine	Solanum		melongena	Traditional cultivar	NO	YES
MM 00612	SOLANUM X	1985	Togo	DESNOYES-I.R.A.T.	Aubergine	Solanum	LEPTOSTEMONUM	MACROCARPON L.		NO	YES
MM 00613	DUNHE EGGPLANT	1985	China	DIN LIPING-VEG. RES. INST.	Aubergine	Solanum		melongena		NO	YES
MM 00614	PUSA PURPLE LONG 2	1986	India	CHOUDHURY-IND. AGRIC. RES. INST.-NEW DELHI	Aubergine	Solanum		melongena		NO	YES
MM 00615	ANNAMALAI	1986	India	CHOUDHURY-IND. AGRIC. RES. INST.-NEW DELHI	Aubergine	Solanum		melongena		NO	YES
MM 00616	PUSA BHAIRAV	1986	India	CHOUDHURY-IND. AGRIC. RES. INST.-NEW DELHI	Aubergine	Solanum		melongena		NO	YES
MM 00617	PUSA KRANTI	1986	India	CHOUDHURY-IND. AGRIC. RES. INST.-NEW DELHI	Aubergine	Solanum		melongena		NO	YES
MM 00618	PUNJAB BAHAR	1986	India	CHOUDHURY-IND. AGRIC. RES. INST.-NEW DELHI	Aubergine	Solanum		melongena		NO	YES
MM 00619	ARKA NAVNEET	1986	India	CHOUDHURY-IND. AGRIC. RES. INST.-NEW DELHI	Aubergine	Solanum		melongena		NO	YES
MM 00619 BIS	ARKA NAVNEET	1986	India	CHOUDHURY-IND. AGRIC. RES. INST.-NEW DELHI	Aubergine	Solanum		melongena		NO	NO
MM 00620	MANJARI GOTA	1986	India	CHOUDHURY-IND. AGRIC. RES. INST.-NEW DELHI	Aubergine	Solanum		melongena		NO	YES
MM 00621	R-H-R 51	1986	India	CHOUDHURY-IND. AGRIC. RES. INST.-NEW DELHI	Aubergine	Solanum		melongena		NO	YES
MM 00622	R-H-R 58	1986	India	CHOUDHURY-IND. AGRIC. RES. INST.-NEW DELHI	Aubergine	Solanum		melongena		NO	YES
MM 00624	SENRYO N°2	1986	Japan	TAKII SEED	Aubergine	Solanum		melongena	Breeder's material	NO	YES
MM 00629	LANGE VIOLETTE	1986	Germany	WAGNER	Aubergine	Solanum		melongena		NO	YES
MM 00632	SPINELESS TYPE	1986	Ecuador	HERMANN-TECH. UNIV.-BERLIN	Aubergine	Solanum	LEPTOSTEMONUM	QUITOENSE LAM.	Wild	NO	NO
MM 00633	SPINY TYPE	1986	Colombia	HERMANN-TECH. UNIV.-BERLIN	Aubergine	Solanum	LEPTOSTEMONUM	QUITOENSE LAM.	Wild	NO	NO
MM 00636	VISERBA	1986	Italy	ASGROW SEED	Aubergine	Solanum		melongena	Advanced or improved cultivar	NO	YES
MM 00638	PL2 P6 P6	1986	UNKNOWN	DESNOYES-I.R.A.T.	Aubergine	Solanum		melongena	Breeder's material	NO	YES
MM 00639	AUB. LOCALE	1986	Martinique	DESNOYES-I.R.A.T.	Aubergine	Solanum		melongena		YES	YES
MM 00641	Nameless	1986	UNKNOWN	HERMANN-TECH. UNIV.-BERLIN	Aubergine	Solanum	POTATOE	MURICATUM AIT.	Wild	NO	NO
MM 00643	SM6	1986	UNKNOWN	INRAE	Aubergine	Solanum		melongena		NO	NO
MM 00644	G 197	1986	Japan	INRAE	Aubergine	Solanum	LEPTOSTEMONUM	MELONGENA L. (GROUPE H)		NO	NO
MM 00645	(SI 390 211)	1986	India	U.S.D.A.	Aubergine	Solanum	LEPTOSTEMONUM	MELONGENA L. (GROUPE H)		NO	NO
MM 00645 A	(SI 390211)	1986	India	USDA	Aubergine	Solanum	LEPTOSTEMONUM	MELONGENA L. (GROUPE H)		NO	NO
MM 00645 B	(SI 390211)	1986	India	USDA	Aubergine	Solanum	LEPTOSTEMONUM	MELONGENA L. (GROUPE H)		NO	NO
MM 00645 C	(SI 390211)	1986	India	USDA	Aubergine	Solanum	LEPTOSTEMONUM	MELONGENA L. (GROUPE H)		NO	NO
MM 00645 D	(SI 390211)	1986	India	USDA	Aubergine	Solanum	LEPTOSTEMONUM	MELONGENA L. (GROUPE H)		NO	NO
MM 00645 E	(SI 390211)	1986	India	USDA	Aubergine	Solanum	LEPTOSTEMONUM	MELONGENA L. (GROUPE H)		NO	NO
MM 00645 F	(SI 390211)	1986	India	USDA	Aubergine	Solanum	LEPTOSTEMONUM	MELONGENA L. (GROUPE H)		NO	NO
MM 00646	(SI 381 155)	1986	India	U.S.D.A.	Aubergine	Solanum	LEPTOSTEMONUM	MELONGENA L. (GROUPE H)		NO	NO
MM 00646 BIS	(SI 381 155)	1986	India	U.S.D.A.	Aubergine	Solanum	LEPTOSTEMONUM	MELONGENA L. (GROUPE H)		NO	NO
MM 00646 TER	(SI 381 155)	1986	India	U.S.D.A.	Aubergine	Solanum	LEPTOSTEMONUM	MELONGENA L. (GROUPE H)		NO	NO
MM 00649	COCONA, TOPIRO	1986	Ecuador	HEISER-INDIANA UNIV.	Aubergine	Solanum	LEPTOSTEMONUM	SESSILIFLORUM DUNAL	Wild	NO	NO
MM 00650	NARANJILLA, LULO	1986	Costa Rica	HEISER-INDIANA UNIV.	Aubergine	Solanum	LEPTOSTEMONUM	QUITOENSE LAM.	Wild	NO	NO
MM 00651	NARANJILLA (8850)	1986	Costa Rica	Private individual	Aubergine	Solanum	LEPTOSTEMONUM	QUITOENSE LAM.	Wild	NO	NO
MM 00652	COCONA (13094)	1986	Costa Rica	Private individual	Aubergine	Solanum	LEPTOSTEMONUM	SESSILIFLORUM DUNAL	Wild	NO	NO
MM 00653	WEST COAST GREEN ROUND 112.8	1986	India	BEJAPPA-UNIV. OF AGRIC.-BANGALORE	Aubergine	Solanum		melongena		NO	YES
MM 00653 BIS	WEST COAST GREEN ROUND 112.8	1986	India	BEJAPPA-UNIV. OF AGRIC.-BANGALORE	Aubergine	Solanum		melongena		NO	NO
MM 00654	G-K-V-K COMPOSIT 1	1986	India	BEJAPPA-UNIV. OF AGRIC.-BANGALORE	Aubergine	Solanum		melongena		NO	YES
MM 00655	PING TUNG LONG 2	1986	China	EVERGROW SEED	Aubergine	Solanum		melongena		NO	YES
MM 00656	MACHIH LONG	1986	China	EVERGROW SEED	Aubergine	Solanum		melongena		NO	YES
MM 00658	SHINNIANG	1986	China	KNOWN-YOU SEED VIA GREEN	Aubergine	Solanum		melongena		NO	YES
MM 00660	FARMERS LONG	1986	China	KNOWN-YOU SEED VIA GREEN	Aubergine	Solanum		melongena		NO	YES
MM 00661	BIRM/S.0050	1987	United Republic of Tanzania	LESTER-BIRMINGHAM UNIV.	Aubergine	Solanum	LEPTOSTEMONUM	INCANUM L. (GROUPE A)	Wild	NO	NO
MM 00662	BIRM/S.0657	1987	France	LESTER-BIRMINGHAM UNIV.	Aubergine	Solanum		melongena		NO	NO
MM 00663	BIRM/S.1064	1987	Uganda	LESTER-BIRMINGHAM UNIV.	Aubergine	Solanum	LEPTOSTEMONUM	INCANUM L. (GROUPE A)	Wild	NO	NO
MM 00664	BIRM/S.1301	1987	UNKNOWN	JARDIN BOTANIQUE-TEL AVIV	Aubergine	Solanum	LEPTOSTEMONUM	INCANUM L. (GROUPE C)	Wild	NO	YES
MM 00665	BIRM/S.1382	1987	Zambia	LESTER-BIRMINGHAM UNIV.	Aubergine	Solanum	LEPTOSTEMONUM	INCANUM L. (GROUPE B)	Wild	NO	NO
MM 00666	BIRM/S.1396	1987	Zimbabwe	LESTER-BIRMINGHAM UNIV.	Aubergine	Solanum	LEPTOSTEMONUM	INCANUM L. (GROUPE D)	Wild	NO	NO
MM 00667	BIRM/S.1397	1987	Zimbabwe	LESTER-BIRMINGHAM UNIV.	Aubergine	Solanum	LEPTOSTEMONUM	INCANUM L. (GROUPE D)	Wild	NO	NO
MM 00668	BIRM/S.1398	1987	Zimbabwe	LESTER-BIRMINGHAM UNIV.	Aubergine	Solanum	LEPTOSTEMONUM	INCANUM L. (GROUPE B)	Wild	NO	NO
MM 00668 BIS	BIRM/S.1398	1991	Zimbabwe	LESTER-BIRMINGHAM UNIV.	Aubergine	Solanum	LEPTOSTEMONUM	INCANUM L. (GROUPE B)	Wild	NO	NO
MM 00669	BIRM/S.1490	1987	India	LESTER-BIRMINGHAM UNIV.	Aubergine	Solanum	LEPTOSTEMONUM	MELONGENA L. (GROUPE E)	Wild	NO	YES
MM 00669 BIS	BIRM/S.1490	1987	India	LESTER-BIRMINGHAM UNIV.	Aubergine	Solanum	LEPTOSTEMONUM	MELONGENA L. (GROUPE F)	Wild	NO	YES
MM 00670	BIRM/S.1501	1987	Zambia	LESTER-BIRMINGHAM UNIV.	Aubergine	Solanum	LEPTOSTEMONUM	INCANUM L. (GROUPE B)	Wild	NO	NO
MM 00671	BIRM/S.1502	1987	UNKNOWN	LESTER-BIRMINGHAM UNIV.	Aubergine	Solanum	LEPTOSTEMONUM	MELONGENA L. (GROUPE G)		NO	NO
MM 00671 BIS	BIRM/S.1502	1987	UNKNOWN	LESTER-BIRMINGHAM UNIV.	Aubergine	Solanum	LEPTOSTEMONUM	MELONGENA L. (GROUPE G)		NO	NO
MM 00672	BIRM/S.1512	1987	Israel	LESTER-BIRMINGHAM UNIV.	Aubergine	Solanum	LEPTOSTEMONUM	INCANUM L. (GROUPE C)	Wild	NO	NO
MM 00673	BIRM/S.1517	1987	India	LESTER-BIRMINGHAM UNIV.	Aubergine	Solanum	LEPTOSTEMONUM	MELONGENA L. (GROUPE G)		NO	NO
MM 00674	BIRM/S.1518	1987	South Africa	LESTER-BIRMINGHAM UNIV.	Aubergine	Solanum	LEPTOSTEMONUM	INCANUM L. (GROUPE D)	Wild	NO	YES
MM 00675	BIRM/S.1554	1987	India	LESTER-BIRMINGHAM UNIV.	Aubergine	Solanum	LEPTOSTEMONUM	MELONGENA L. (GROUPE E)	Wild	NO	NO
MM 00676	BIRM/S.1692	1987	South Africa	LESTER-BIRMINGHAM UNIV.	Aubergine	Solanum	LEPTOSTEMONUM	INCANUM L. (GROUPE D)	Wild	NO	NO
MM 00677	BIRM/S.1750	1987	Iran (Islamic Republic of)	LESTER-BIRMINGHAM UNIV.	Aubergine	Solanum	LEPTOSTEMONUM	INCANUM L. (GROUPE C)	Wild	NO	YES
MM 00678	BIRM/S.1776	1987	United Republic of Tanzania	LESTER-BIRMINGHAM UNIV.	Aubergine	Solanum	LEPTOSTEMONUM	LAMPROCARPUM BITTER	Wild	NO	YES
MM 00679	BIRM/S.1778	1987	United Republic of Tanzania	LESTER-BIRMINGHAM UNIV.	Aubergine	Solanum	LEPTOSTEMONUM	INCANUM L. (GROUPE A)	Wild	NO	NO
MM 00680	BIRM/S.1780	1987	United Republic of Tanzania	LESTER-BIRMINGHAM UNIV.	Aubergine	Solanum	LEPTOSTEMONUM	INCANUM L. (GROUPE A)	Wild	NO	NO
MM 00681	BIRM/S.1781	1987	United Republic of Tanzania	LESTER-BIRMINGHAM UNIV.	Aubergine	Solanum	LEPTOSTEMONUM	INCANUM L. (GROUPE B)	Wild	NO	NO
MM 00683	BIRM/S.1786	1987	South Africa	LESTER-BIRMINGHAM UNIV.	Aubergine	Solanum	LEPTOSTEMONUM	INCANUM L. (GROUPE B)	Wild	NO	NO
MM 00684	BIRM/S.1793	1987	Ethiopia	LESTER-BIRMINGHAM UNIV.	Aubergine	Solanum	LEPTOSTEMONUM	INCANUM L. (GROUPE C)	Wild	NO	YES
MM 00685	BIRM/S.1940	1987	Indonesia	LESTER-BIRMINGHAM UNIV.	Aubergine	Solanum	LEPTOSTEMONUM	MELONGENA L. (GROUPE G)		NO	YES
MM 00686	BIRM/S.1942	1987	Indonesia	LESTER-BIRMINGHAM UNIV.	Aubergine	Solanum	LEPTOSTEMONUM	MELONGENA L. (GROUPE F)	Wild	NO	YES
MM 00687	BIRM/S.2384	1987	Malaysia	LESTER-BIRMINGHAM UNIV.	Aubergine	Solanum	LEPTOSTEMONUM	MELONGENA L. (GROUPE G)		NO	NO
MM 00688	BIRM/S.2401	1987	UNKNOWN	LESTER-BIRMINGHAM UNIV.	Aubergine	Solanum	LEPTOSTEMONUM	MELONGENA L. (GROUPE G)		NO	NO
MM 00689	BIRM/S.2402	1987	Malaysia	LESTER-BIRMINGHAM UNIV.	Aubergine	Solanum	LEPTOSTEMONUM	MELONGENA L. (GROUPE H)		NO	YES
MM 00690	BIRM/S.2421	1987	Malaysia	LESTER-BIRMINGHAM UNIV.	Aubergine	Solanum	LEPTOSTEMONUM	MELONGENA L. (GROUPE G)		NO	NO
MM 00690 BIS	BIRM/S.2421	1987	Malaysia	LESTER-BIRMINGHAM UNIV.	Aubergine	Solanum	LEPTOSTEMONUM	MELONGENA L. (GROUPE G)		NO	NO
MM 00691	BIRM/S.2442	1987	Thailand	LESTER-BIRMINGHAM UNIV.	Aubergine	Solanum		melongena		NO	YES
MM 00692	BIRM/S.1959	1987	Sri Lanka	LESTER-BIRMINGHAM UNIV.	Aubergine	Solanum	LEPTOSTEMONUM	MELONGENA L. (GROUPE G)		NO	YES
MM 00693	BIRM/S.1961	1987	Sri Lanka	LESTER-BIRMINGHAM UNIV.	Aubergine	Solanum	LEPTOSTEMONUM	MELONGENA L. (GROUPE F)	Wild	NO	NO
MM 00693 BIS	BIRM/S.1961	1987	Sri Lanka	LESTER-BIRMINGHAM UNIV.	Aubergine	Solanum	LEPTOSTEMONUM	MELONGENA L. (GROUPE F)	Wild	NO	NO
MM 00694	BIRM/S.1992	1987	India	LESTER-BIRMINGHAM UNIV.	Aubergine	Solanum	LEPTOSTEMONUM	MELONGENA L. (GROUPE F)	Wild	NO	YES
MM 00695	BIRM/S.2019	1987	Kenya	LESTER-BIRMINGHAM UNIV.	Aubergine	Solanum	LEPTOSTEMONUM	INCANUM L. (GROUPE A)	Wild	NO	NO
MM 00696	BIRM/S.2023	1987	Kenya	LESTER-BIRMINGHAM UNIV.	Aubergine	Solanum	LEPTOSTEMONUM	INCANUM L. (GROUPE A)	Wild	NO	NO
MM 00696 BIS	BIRM/S.2023	1987	Kenya	LESTER-BIRMINGHAM UNIV.	Aubergine	Solanum	LEPTOSTEMONUM	INCANUM L. (GROUPE A)	Wild	NO	NO
MM 00697	BIRM/S.2024	1987	Kenya	LESTER-BIRMINGHAM UNIV.	Aubergine	Solanum	LEPTOSTEMONUM	INCANUM L. (GROUPE A)	Wild	NO	NO
MM 00698	BIRM/S.2025	1987	Kenya	LESTER-BIRMINGHAM UNIV.	Aubergine	Solanum		INCANUM L. (GROUPE A) (DIPLACANTHUM?)	Wild	NO	NO
MM 00699	BIRM/S.2026	1987	Kenya	LESTER-BIRMINGHAM UNIV.	Aubergine	Solanum	LEPTOSTEMONUM	INCANUM L. (GROUPE A)	Wild	NO	NO
MM 00700	BIRM/S.2027	1987	Kenya	LESTER-BIRMINGHAM UNIV.	Aubergine	Solanum	LEPTOSTEMONUM	INCANUM L. (GROUPE A)	Wild	NO	NO
MM 00701	BIRM/S.2028	1987	Kenya	LESTER-BIRMINGHAM UNIV.	Aubergine	Solanum	LEPTOSTEMONUM	INCANUM L. (GROUPE A)	Wild	NO	NO
MM 00702	BIRM/S.2029	1987	Kenya	LESTER-BIRMINGHAM UNIV.	Aubergine	Solanum	LEPTOSTEMONUM	INCANUM L. (GROUPE A)	Wild	NO	NO
MM 00703	BIRM/S.2052	1987	Kenya	LESTER-BIRMINGHAM UNIV.	Aubergine	Solanum	LEPTOSTEMONUM	INCANUM L. (GROUPE A)	Wild	NO	NO
MM 00703 BIS	BIRM/S.2052	1987	Kenya	LESTER-BIRMINGHAM UNIV.	Aubergine	Solanum	LEPTOSTEMONUM	INCANUM L. (GROUPE A)	Wild	NO	NO
MM 00704	BIRM/S.2053	1987	Malawi	LESTER-BIRMINGHAM UNIV.	Aubergine	Solanum	LEPTOSTEMONUM	INCANUM L. (GROUPE B)	Wild	NO	NO
MM 00705	BIRM/S.2055	1987	Malawi	LESTER-BIRMINGHAM UNIV.	Aubergine	Solanum	LEPTOSTEMONUM	INCANUM L. (GROUPE B)	Wild	NO	NO
MM 00706	BIRM/S.2310	1987	Madagascar	LESTER-BIRMINGHAM UNIV.	Aubergine	Solanum	LEPTOSTEMONUM	MELONGENA L. (GROUPE F)	Wild	NO	YES
MM 00707	BIRM/S.2371	1987	Ethiopia	LESTER-BIRMINGHAM UNIV.	Aubergine	Solanum	LEPTOSTEMONUM	INCANUM L. (GROUPE A)	Wild	NO	NO
MM 00709	BIRM/S.2426	1987	Malaysia	LESTER-BIRMINGHAM UNIV.	Aubergine	Solanum	LEPTOSTEMONUM	MELONGENA L. (GROUPE F)	Wild	NO	NO
MM 00710	BIRM/S.2440	1987	Thailand	LESTER-BIRMINGHAM UNIV.	Aubergine	Solanum	LEPTOSTEMONUM	MELONGENA L. (GROUPE F)	Wild	NO	NO
MM 00710 [A]	BIRM/S.2440	1987	Thailand	LESTER-BIRMINGHAM UNIV.	Aubergine	Solanum	LEPTOSTEMONUM	MELONGENA L. (GROUPE F)	Wild	NO	NO
MM 00710 [B]	BIRM/S.2440	1987	Thailand	LESTER-BIRMINGHAM UNIV.	Aubergine	Solanum	LEPTOSTEMONUM	MELONGENA L. (GROUPE F)	Wild	NO	NO
MM 00710 [C]	BIRM/S.2440	1987	Thailand	LESTER-BIRMINGHAM UNIV.	Aubergine	Solanum	LEPTOSTEMONUM	MELONGENA L. (GROUPE F)	Wild	NO	NO
MM 00710 [D]	BIRM/S.2440	1987	Thailand	LESTER-BIRMINGHAM UNIV.	Aubergine	Solanum	LEPTOSTEMONUM	MELONGENA L. (GROUPE F)	Wild	NO	NO
MM 00711	BIRM/S.2459	1987	Saudi Arabia	LESTER-BIRMINGHAM UNIV.	Aubergine	Solanum	LEPTOSTEMONUM	INCANUM L. (GROUPE C)	Wild	NO	NO
MM 00712	BIRM/S.2461	1987	Kenya	LESTER-BIRMINGHAM UNIV.	Aubergine	Solanum	LEPTOSTEMONUM	INCANUM L. (GROUPE A)	Wild	NO	NO
MM 00713	BIRM/S.2465	1987	South Africa	LESTER-BIRMINGHAM UNIV.	Aubergine	Solanum	LEPTOSTEMONUM	INCANUM L. (GROUPE D)	Wild	NO	NO
MM 00714	RNL 332	1987	Zimbabwe	LESTER-BIRMINGHAM UNIV.	Aubergine	Solanum	LEPTOSTEMONUM	MACROCARPON L.		NO	NO
MM 00715	BIRM/S.0931	1987	UNKNOWN	JARDIN BOTANIQUE-TEL AVIV	Aubergine	Solanum	LEPTOSTEMONUM	INCANUM L. (GROUPE C)	Wild	NO	NO
MM 00716	BIRM/S.0859	1987	Uganda	LESTER-BIRMINGHAM UNIV.	Aubergine	Solanum	LEPTOSTEMONUM	INCANUM L. (GROUPE A/B)	Wild	NO	NO
MM 00716 BIS	BIRM/S.0859	1991	Uganda	LESTER-BIRMINGHAM UNIV.	Aubergine	Solanum	LEPTOSTEMONUM	INCANUM L. (GROUPE A)	Wild	NO	NO
MM 00717	LINCOLN GOLD 1	1987	New Zealand	FAUTRIER-LINCOLN UNIV.	Aubergine	Solanum	POTATOE	MURICATUM AIT.	Wild	NO	NO
MM 00718	LINCOLN GOLD x LINCOLN LONG 2	1987	New Zealand	FAUTRIER-LINCOLN UNIV.	Aubergine	Solanum	POTATOE	MURICATUM AIT.	Wild	NO	NO
MM 00719	LINCOLN GOLD 3	1987	New Zealand	FAUTRIER-LINCOLN UNIV.	Aubergine	Solanum	POTATOE	MURICATUM AIT.	Wild	NO	NO
MM 00721	LINCOLN LONG 5	1987	New Zealand	FAUTRIER-LINCOLN UNIV.	Aubergine	Solanum	POTATOE	MURICATUM AIT.	Wild	NO	NO
MM 00722	LINCOLN LONG 6	1987	New Zealand	FAUTRIER-LINCOLN UNIV.	Aubergine	Solanum	POTATOE	MURICATUM AIT.	Wild	NO	NO
MM 00724	Nameless	1987	Brazil	INRAE	Aubergine	Solanum	LEPTOSTEMONUM	SISYMBRIFOLIUM LAM.	Wild	NO	NO
MM 00725	LA CHINOISE	1987	French Polynesia	INRAE	Aubergine	Solanum		melongena		NO	YES
MM 00726	Nameless	1987	Italy	RESTAINO-IST. SPERIM. PER L'ORTIC.	Aubergine	Solanum	LEPTOSTEMONUM	LINNAEANUM HEPPER & JAEGER	Wild	NO	NO
MM 00730	ARKA SHIRISH	1988	India	IND. INST. OF HORTIC. RES.	Aubergine	Solanum		melongena		NO	YES
MM 00731	ARKA SHEEL	1988	India	IND. INST. OF HORTIC. RES.	Aubergine	Solanum		melongena	Traditional cultivar	NO	YES
MM 00733	ARKA KUSUMAKAR	1988	India	IND. INST. OF HORTIC. RES.	Aubergine	Solanum		melongena		NO	NO
MM 00735	SUMA	1987	New Zealand	FAUTRIER-LINCOLN UNIV.	Aubergine	Solanum	POTATOE	MURICATUM AIT.	Wild	NO	NO
MM 00738	PARENT FEMELLE DE RIMA	1987	Netherlands	SLUIS & GROOT	Aubergine	Solanum		melongena		NO	NO
MM 00756	SAM vert	1988	France	INRAE	Aubergine	Solanum			Interspecific cross	NO	NO
MM 00757	SAM 01 FL	1988	France	INRAE	Aubergine	Solanum			Interspecific cross	NO	NO
MM 00758	SAM 03 FL	1988	France	INRAE	Aubergine	Solanum			Interspecific cross	NO	NO
MM 00759	SAM 04 FL	1988	France	INRAE	Aubergine	Solanum			Interspecific cross	NO	NO
MM 00760	SAM 05 FL	1988	France	INRAE	Aubergine	Solanum			Interspecific cross	NO	NO
MM 00761	SAM 06 FL	1988	France	INRAE	Aubergine	Solanum			Interspecific cross	NO	NO
MM 00762	SAM 08 FL	1988	France	INRAE	Aubergine	Solanum			Interspecific cross	NO	NO
MM 00763	SAM 09 FL	1988	France	INRAE	Aubergine	Solanum			Interspecific cross	NO	NO
MM 00764	SAM 11 FL	1988	France	INRAE	Aubergine	Solanum			Interspecific cross	NO	NO
MM 00765	SAM 12 FL	1988	France	INRAE	Aubergine	Solanum			Interspecific cross	NO	NO
MM 00766	SAM 13 FL	1988	France	INRAE	Aubergine	Solanum			Interspecific cross	NO	NO
MM 00767	SAM 14 FL	1988	France	INRAE	Aubergine	Solanum			Interspecific cross	NO	NO
MM 00768	SAM 15 FL	1988	France	INRAE	Aubergine	Solanum			Interspecific cross	NO	NO
MM 00769	SAM 16 FL	1988	France	INRAE	Aubergine	Solanum			Interspecific cross	NO	NO
MM 00770	SAM 17 FL	1988	France	INRAE	Aubergine	Solanum			Interspecific cross	NO	NO
MM 00771	SAM 18 FL	1988	France	INRAE	Aubergine	Solanum			Interspecific cross	NO	NO
MM 00772	SAM 19 FL	1988	France	INRAE	Aubergine	Solanum			Interspecific cross	NO	NO
MM 00773	SAM 20 FL	1988	France	INRAE	Aubergine	Solanum			Interspecific cross	NO	NO
MM 00774	SAM 21 FL	1988	France	INRAE	Aubergine	Solanum			Interspecific cross	NO	NO
MM 00775	SAM 22 FL	1988	France	INRAE	Aubergine	Solanum			Interspecific cross	NO	NO
MM 00776	SAM 23 FL	1988	France	INRAE	Aubergine	Solanum			Interspecific cross	NO	NO
MM 00777	SAM 24 FL	1988	France	INRAE	Aubergine	Solanum			Interspecific cross	NO	NO
MM 00778	SAM 25 FL	1988	France	INRAE	Aubergine	Solanum			Interspecific cross	NO	NO
MM 00779	SAM 26 FL	1988	France	INRAE	Aubergine	Solanum			Interspecific cross	NO	NO
MM 00799	SM6	1988	India	IND. AGRIC. RES. INST.	Aubergine	Solanum		melongena		YES	YES
MM 00800	SM6-P1	1988	India	INRAE	Aubergine	Solanum		melongena	Breeder's material	NO	YES
MM 00801	G. 197	1988	Japan	INRAE	Aubergine	Solanum	LEPTOSTEMONUM	MELONGENA L. (GROUPE H)		NO	NO
MM 00801 BIS	G. 197	1988	Japan	INRAE	Aubergine	Solanum	LEPTOSTEMONUM	MELONGENA L. (GROUPE H)		NO	NO
MM 00801 TER	G. 197	1988	Japan	INRAE	Aubergine	Solanum	LEPTOSTEMONUM	MELONGENA L. (GROUPE H)		NO	NO
MM 00802	Nameless	1988	Martinique	INRAE	Aubergine	Solanum	LEPTOSTEMONUM	MAMMOSUM L.	Wild	NO	NO
MM 00803	Nameless	1988	Gabon	S.O.C.I.M.A.G.	Aubergine	Solanum	LEPTOSTEMONUM	AETHIOPICUM L. GR. GILO		NO	NO
MM 00803 BIS	Nameless	1988	Gabon	S.O.C.I.M.A.G.	Aubergine	Solanum	LEPTOSTEMONUM	AETHIOPICUM L. GR. GILO		NO	NO
MM 00804	Nameless	1988	Gabon	S.O.C.I.M.A.G.	Aubergine	Solanum	LEPTOSTEMONUM	AETHIOPICUM L. GR. GILO		NO	NO
MM 00805	LINCOLN GOLD	1988	New Zealand	FAUTRIER-LINCOLN UNIV.	Aubergine	Solanum	POTATOE	MURICATUM AIT.	Wild	NO	NO
MM 00807	MUTANT INRA 4	1988	UNKNOWN	INRAE	Aubergine	Solanum		melongena		YES	YES
MM 00808	ESKANDARANI	1988	Lebanon	KAMALI	Aubergine	Solanum		melongena		NO	YES
MM 00812	Nameless	1989	Congo	INRAE	Aubergine	Solanum	LEPTOSTEMONUM	MACROCARPON L.		NO	YES
MM 00813	CUBIU	1988	Brazil	CONSTANT-INST. NAC. PESQ. AMAZ.	Aubergine	Solanum	LEPTOSTEMONUM	SESSILIFLORUM DUNAL	Wild	NO	NO
MM 00824	Nameless	1989	Ecuador	Private individual	Aubergine	Solanum	LEPTOSTEMONUM	MARGINATUM L. FIL.	Wild	NO	YES
MM 00828	PORCELAINE BARON	1989	Guadeloupe	INRAE	Aubergine	Solanum		melongena		YES	YES
MM 00829	AUBERGINE LOCALE	1989	Congo	INRAE	Aubergine	Solanum	LEPTOSTEMONUM	AETHIOPICUM L. GR. GILO		NO	NO
MM 00830	MOUSSOSSO	1989	Congo	INRAE	Aubergine	Solanum	LEPTOSTEMONUM	AETHIOPICUM L. GR. SHUM		NO	YES
MM 00831	MANTSA	1989	Congo	INRAE	Aubergine	Solanum	SOLANUM	SCABRUM MILL.	Wild	NO	NO
MM 00848	QIANZI	1989	China	INRAE	Aubergine	Solanum		melongena	Traditional cultivar	NO	YES
MM 00849	Nameless	1989	China	INRAE	Aubergine	Solanum	LEPTOSTEMONUM	TORVUM SW.	Wild	NO	NO
MM 00850	Kemer 6	1989	Turkey	Private individual	Aubergine	Solanum		melongena		NO	YES
MM 00852	NANTOU NASU	1989	Japan	MONMA-N.I.V.O.T DEPART. OF VEG. BREEDING	Aubergine	Solanum		melongena		NO	YES
MM 00852 BIS	NANTOU NASU 2	1989	Japan	MONMA-N.I.V.O.T DEPART. OF VEG. BREEDING	Aubergine	Solanum		melongena		NO	NO
MM 00853	DINGRAS MULTIPLE PURPLE	1989	Philippines	MONMA-N.I.V.O.T DEPART. OF VEG. BREEDING	Aubergine	Solanum		melongena		NO	YES
MM 00854	PALIME	1989	Togo	INRAE	Aubergine	Solanum	LEPTOSTEMONUM	AETHIOPICUM L. GR. GILO		NO	NO
MM 00855	KOLOCOPE	1989	Togo	INRAE	Aubergine	Solanum	LEPTOSTEMONUM	MACROCARPON L.		NO	NO
MM 00856	KPOVE	1989	Togo	INRAE	Aubergine	Solanum	LEPTOSTEMONUM	MACROCARPON L.	Traditional cultivar	NO	YES
MM 00860	MILEDA A FRUIT VERT	1989	Netherlands	INRAE	Aubergine	Solanum		melongena		NO	YES
MM 00861	SENSHUU MIZU NASU 1	1989	Japan	MORISHITA-AGR. FORESTRY RES. CENT.-OSAKA	Aubergine	Solanum		melongena		NO	YES
MM 00861 BIS	SENSHUU MIZU NASU 2	1989	Japan	MORISHITA-AGR. FORESTRY RES. CENT.-OSAKA	Aubergine	Solanum		melongena		NO	YES
MM 00862	MIZU-NASU	1989	Japan	MORISHITA-AGR. FORESTRY RES. CENT.-OSAKA	Aubergine	Solanum		melongena		NO	YES
MM 00863	KAMO-NASU	1989	Japan	MORISHITA-AGR. FORESTRY RES. CENT.-OSAKA	Aubergine	Solanum		melongena		NO	YES
MM 00864	TORIGAI-NASU	1989	Japan	MORISHITA-AGR. FORESTRY RES. CENT.-OSAKA	Aubergine	Solanum		melongena		NO	YES
MM 00865	Nameless	1990	Chad	INRAE	Aubergine	Solanum	LEPTOSTEMONUM	AETHIOPICUM L. GR. GILO		NO	NO
MM 00866	Nameless	1990	Chad	INRAE	Aubergine	Solanum	LEPTOSTEMONUM	CERASIFERUM DUNAL	Wild	NO	YES
MM 00867	TUE LES YEUX	1990	Chad	INRAE	Aubergine	Solanum	LEPTOSTEMONUM	CERASIFERUM DUNAL	Wild	NO	NO
MM 00868	AUBERGINE BLANCHE	1990	Chad	INRAE	Aubergine	Solanum	LEPTOSTEMONUM	AETHIOPICUM L. GR. GILO		NO	YES
MM 00869	FORT-RADAMA (FOULPOINTE)	1989	Madagascar	FOURY-E.N.S.H.	Aubergine	Solanum	LEPTOSTEMONUM	RICHARDII DUNAL	Wild	NO	NO
MM 00870	VATOMANDRY	1989	Madagascar	FOURY-E.N.S.H.	Aubergine	Solanum	LEPTOSTEMONUM	AETHIOPICUM L. GR. GILO		NO	YES
MM 00870 BIS	VATOMANDRY	1989	Madagascar	FOURY-E.N.S.H.	Aubergine	Solanum	LEPTOSTEMONUM	AETHIOPICUM L. GR. GILO		NO	NO
MM 00871	TAMATAVE	1989	Madagascar	FOURY-E.N.S.H.	Aubergine	Solanum	LEPTOSTEMONUM	AETHIOPICUM L. GR. GILO		NO	NO
MM 00872	SAMBIRANO	1989	Madagascar	FOURY-E.N.S.H.	Aubergine	Solanum	LEPTOSTEMONUM	MACROCARPON L.		NO	NO
MM 00873	TOPAN	1990	Turkey	OZKALE	Aubergine	Solanum		melongena	Advanced or improved cultivar	NO	YES
MM 00874	AKHISAR	1990	Turkey	OZKALE	Aubergine	Solanum		melongena		NO	YES
MM 00876	AYDIN SIYAHI 3	1990	Turkey	OZKALE	Aubergine	Solanum		melongena		NO	YES
MM 00877	HALKAPINAR	1990	Turkey	OZKALE	Aubergine	Solanum		melongena		NO	YES
MM 00878	ADANA	1990	Turkey	OZKALE	Aubergine	Solanum		melongena		NO	YES
MM 00879	BALIKESIR/KEMER	1990	Turkey	OZKALE	Aubergine	Solanum		melongena		NO	YES
MM 00880	GAZIANTEP	1990	Turkey	OZKALE	Aubergine	Solanum		melongena		NO	YES
MM 00881	EGRIDERE	1990	Turkey	OZKALE	Aubergine	Solanum		melongena		NO	YES
MM 00883	GRANDE RIO	1990	Brazil	AGROFLORA	Aubergine	Solanum	LEPTOSTEMONUM	AETHIOPICUM L. GR. GILO		NO	NO
MM 00884	MORRO GRANDE	1990	Brazil	AGROFLORA	Aubergine	Solanum	LEPTOSTEMONUM	AETHIOPICUM L. GR. GILO		NO	YES
MM 00885	Nameless	1990	China	INST. MEDICINAL PLANT DEVELOP.	Aubergine	Solanum	LEPTOSTEMONUM	CAPSICOIDES ALL.	Wild	NO	NO
MM 00886	Nameless	1990	China	INST. MEDICINAL PLANT DEVELOP.	Aubergine	Solanum	LEPTOSTEMONUM	VIOLACEUM ORT.	Wild	NO	NO
MM 00893	TAKII'S LONG BLACK	1990	Japan	TAKII SEED	Aubergine	Solanum		melongena	Advanced or improved cultivar	NO	YES
MM 00894	BLACK DRAGON	1990	Japan	TAKII SEED	Aubergine	Solanum		melongena	Advanced or improved cultivar	NO	YES
MM 00895	BLACK SHINE	1990	Japan	TAKII SEED	Aubergine	Solanum		melongena	Advanced or improved cultivar	NO	YES
MM 00897	POMMIER D'AMOUR	1990	UNKNOWN	CAILLARD SEMENCE	Aubergine	Solanum	MINON	PSEUDOCAPSICUM L.	Wild	NO	NO
MM 00900	Nameless	1990	United Republic of Tanzania	INRAE	Aubergine	Solanum	LEPTOSTEMONUM	INCANUM L. (GROUPE A)	Wild	NO	NO
MM 00900 BIS	Nameless	1990	United Republic of Tanzania	INRAE	Aubergine	Solanum	LEPTOSTEMONUM	INCANUM L. (GROUPE A/B)	Wild	NO	NO
MM 00902	Nameless	1990	UNKNOWN	MEIJ-P.T.G.	Aubergine	Solanum	LEPTOSTEMONUM	AETHIOPICUM L. GR. GILO		NO	NO
MM 00904	Nameless	1990	Chad	INRAE	Aubergine	Solanum	LEPTOSTEMONUM	AETHIOPICUM L. GR. GILO		NO	NO
MM 00905	Nameless	1990	Chad	INRAE	Aubergine	Solanum	LEPTOSTEMONUM	MACROCARPON L.		NO	NO
MM 00906	Nameless	1990	Chad	INRAE	Aubergine	Solanum	LEPTOSTEMONUM	FORSKALII KOTSCHY EX DUNAL	Wild	NO	YES
MM 00907	MORELLE NOIRE	1990	Chad	INRAE	Aubergine	Solanum	SOLANUM	AMERICANUM MILL.	Wild	NO	NO
MM 00908	Nameless	1990	Chad	INRAE	Aubergine	Solanum	LEPTOSTEMONUM	COAGULANS FORSSK.	Wild	NO	YES
MM 00909	Nameless	1990	Chad	INRAE	Aubergine	Solanum	LEPTOSTEMONUM	COAGULANS FORSSK.	Wild	NO	NO
MM 00910	Nameless	1990	France	GIRERD GRAINES	Aubergine	Solanum	POTATOE	DULCAMARA L.	Wild	NO	NO
MM 00915	AUB. BLANCHE (MAL NOMMEE)	1990	Lebanon	SARDY-INST. RECH. AGRON. LIB.	Aubergine	Solanum		melongena		NO	YES
MM 00916	N° 8918202	1990	UNKNOWN	CHIRON-AGROSEM	Aubergine	Solanum		melongena	Mutant	NO	YES
MM 00917	N° 9011011	1990	UNKNOWN	CHIRON-AGROSEM	Aubergine	Solanum		melongena	Mutant	NO	YES
MM 00926	DODOMA	1991	United Republic of Tanzania	EVERS-SOKOINE UNIV. OF AGRIC.-MOROGORO	Aubergine	Solanum	LEPTOSTEMONUM	INCANUM L. (GROUPE A)	Wild	NO	NO
MM 00928	BOGOMORO	1990	Chad	INRAE	Aubergine	Solanum	LEPTOSTEMONUM	CERASIFERUM DUNAL	Wild	NO	NO
MM 00931	AG 91-01 (RFM 07-04)	1991	Guadeloupe	INRAE	Aubergine	Solanum		melongena		NO	NO
MM 00931 bis	AG 91-01 (RFM 07-04)	1991	Guadeloupe	INRAE	Aubergine	Solanum		melongena		NO	NO
MM 00932	AG 91-02 (A1)	1991	Guadeloupe	INRAE	Aubergine	Solanum		melongena		NO	NO
MM 00933	AG 91-03 (GM 47)	1991	Guadeloupe	INRAE	Aubergine	Solanum		melongena		NO	NO
MM 00934	AG 91-04 (A10)	1991	Guadeloupe	INRAE	Aubergine	Solanum		melongena		NO	NO
MM 00935	AG 91-05 (A)	1991	Guadeloupe	INRAE	Aubergine	Solanum		melongena		NO	NO
MM 00936	AG 91-06 (A LONG)	1991	Guadeloupe	INRAE	Aubergine	Solanum		melongena		NO	NO
MM 00937	AG 91-07 (SAF BLANC)	1991	Guadeloupe	INRAE	Aubergine	Solanum		melongena		NO	NO
MM 00938	AG 91-08	1991	Guadeloupe	INRAE	Aubergine	Solanum		melongena		NO	NO
MM 00939	AG 91-09	1991	Guadeloupe	INRAE	Aubergine	Solanum		melongena		NO	NO
MM 00940	AG 91-10	1991	Guadeloupe	INRAE	Aubergine	Solanum		melongena		NO	NO
MM 00941	AG 91-11	1991	Guadeloupe	INRAE	Aubergine	Solanum		melongena		NO	NO
MM 00942	AG 91-12 (SD15)	1991	Guadeloupe	INRAE	Aubergine	Solanum		melongena		NO	NO
MM 00943	HORTI-TENGERU	1991	United Republic of Tanzania	EVERS-SOKOINE UNIV. OF AGRIC.-MOROGORO	Aubergine	Solanum	LEPTOSTEMONUM	AETHIOPICUM L. GR. GILO		NO	NO
MM 00944	HUMBOLO (DODOMA)	1991	United Republic of Tanzania	EVERS-SOKOINE UNIV. OF AGRIC.-MOROGORO	Aubergine	Solanum	LEPTOSTEMONUM	AETHIOPICUM L. GR. GILO		NO	YES
MM 00945	MAFINGA	1991	United Republic of Tanzania	EVERS-SOKOINE UNIV. OF AGRIC.-MOROGORO	Aubergine	Solanum	LEPTOSTEMONUM	ANGUIVI AGG.	Wild	NO	NO
MM 00946	USAMBARA	1991	United Republic of Tanzania	EVERS-SOKOINE UNIV. OF AGRIC.-MOROGORO	Aubergine	Solanum	LEPTOSTEMONUM	INCANUM L. (GROUPE A)	Wild	NO	NO
MM 00946 BIS	USAMBARA	1991	United Republic of Tanzania	EVERS-SOKOINE UNIV. OF AGRIC.-MOROGORO	Aubergine	Solanum	LEPTOSTEMONUM	INCANUM L. (GROUPE A)	Wild	NO	NO
MM 00947	MOSHI	1991	United Republic of Tanzania	EVERS-SOKOINE UNIV. OF AGRIC.-MOROGORO	Aubergine	Solanum	LEPTOSTEMONUM	INCANUM L. (GROUPE A)	Wild	NO	NO
MM 00948	AG 91-13 (SD09)	1991	Guadeloupe	INRAE	Aubergine	Solanum		melongena		NO	NO
MM 00949	AG 91-14 (Z F2 AUTO)	1991	Guadeloupe	INRAE	Aubergine	Solanum		melongena		NO	NO
MM 00950	AG 91-15 (CZB X RFM 7-4) (ou AG 91-15 (ZB X RFF7-4))	1991	Guadeloupe	INRAE	Aubergine	Solanum		melongena		NO	NO
MM 00951	AG 91-16 (SD18)	1991	Guadeloupe	INRAE	Aubergine	Solanum		melongena		NO	NO
MM 00952	AG 91-17 (SD04)	1991	Guadeloupe	INRAE	Aubergine	Solanum		melongena		NO	NO
MM 00953	AG 91-18 (SAR 90-4-1)	1991	Guadeloupe	INRAE	Aubergine	Solanum		melongena		NO	NO
MM 00954	AG 91-19 (SAR 90-3-1)	1991	Guadeloupe	INRAE	Aubergine	Solanum		melongena		NO	NO
MM 00955	AG 91-20 (SAF CN 7-1)	1991	Guadeloupe	INRAE	Aubergine	Solanum		melongena		NO	NO
MM 00956	AG 91-21 (SAR 90-16)	1991	Guadeloupe	INRAE	Aubergine	Solanum		melongena		NO	NO
MM 00957	AG 91-22 (SAR 90-19-3)	1991	Guadeloupe	INRAE	Aubergine	Solanum		melongena		NO	NO
MM 00959	AG 91-24 (SD03)	1991	Guadeloupe	INRAE	Aubergine	Solanum		melongena		NO	NO
MM 00960	AG 91-25 (SD20)	1991	Guadeloupe	INRAE	Aubergine	Solanum		melongena		NO	NO
MM 00961	AG 91-26 (SD22)	1991	Guadeloupe	INRAE	Aubergine	Solanum		melongena		NO	NO
MM 00962	AG 91-27 (SD01)	1991	Guadeloupe	INRAE	Aubergine	Solanum		melongena		NO	NO
MM 00963	AG 91-28 (SD12)	1991	Guadeloupe	INRAE	Aubergine	Solanum		melongena		NO	NO
MM 00963 BIS	AG 91-28 (SD12)	1991	Guadeloupe	INRAE	Aubergine	Solanum		melongena		NO	NO
MM 00964	AG 91-29 (SAR 90-15-1)	1991	Guadeloupe	INRAE	Aubergine	Solanum		melongena		NO	NO
MM 00965	GMP 2	1991	Guadeloupe	INRAE	Aubergine	Solanum		descendance interspécifique	Interspecific cross	NO	NO
MM 00966	GMP 4	1991	Guadeloupe	INRAE	Aubergine	Solanum		descendance interspécifique	Interspecific cross	NO	NO
MM 00967	GMP 5	1991	Guadeloupe	INRAE	Aubergine	Solanum		descendance interspécifique	Interspecific cross	NO	NO
MM 00968	GMP 7	1991	Guadeloupe	INRAE	Aubergine	Solanum		descendance interspécifique	Interspecific cross	NO	NO
MM 00969	GMP 17	1991	Guadeloupe	INRAE	Aubergine	Solanum		descendance interspécifique	Interspecific cross	NO	NO
MM 00970	GMP 18	1991	Guadeloupe	INRAE	Aubergine	Solanum		descendance interspécifique	Interspecific cross	NO	NO
MM 00971	GMP 28	1991	Guadeloupe	INRAE	Aubergine	Solanum		descendance interspécifique	Interspecific cross	NO	NO
MM 00972	GMP 30	1991	Guadeloupe	INRAE	Aubergine	Solanum		descendance interspécifique	Interspecific cross	NO	NO
MM 00973	GMP 31	1991	Guadeloupe	INRAE	Aubergine	Solanum		descendance interspécifique	Interspecific cross	NO	NO
MM 00974	GMP 35	1991	Guadeloupe	INRAE	Aubergine	Solanum		descendance interspécifique	Interspecific cross	NO	NO
MM 00975	GMP 45	1991	Guadeloupe	INRAE	Aubergine	Solanum		descendance interspécifique	Interspecific cross	NO	NO
MM 00976	MELANGE TROIS PLANTES	1991	Guadeloupe	INRAE	Aubergine	Solanum		descendance interspécifique	Interspecific cross	NO	NO
MM 00977	BIRM/S.1755	1991	Swaziland	LESTER-BIRMINGHAM UNIV.	Aubergine	Solanum	LEPTOSTEMONUM	GIGANTEUM JACQ.	Wild	NO	YES
MM 00978	BIRM/S.2016	1991	United Republic of Tanzania	LESTER-BIRMINGHAM UNIV.	Aubergine	Solanum	LEPTOSTEMONUM	ACULEASTRUM DUNAL	Wild	NO	NO
MM 00979	BIRM/S.2339	1991	Burkina Faso	LESTER-BIRMINGHAM UNIV.	Aubergine	Solanum	LEPTOSTEMONUM	AETHIOPICUM L. GR. KUMBA	Traditional cultivar	NO	YES
MM 00980	BIRM/S.1339/NAKATTI	1991	Uganda	LESTER-BIRMINGHAM UNIV.	Aubergine	Solanum	LEPTOSTEMONUM	AETHIOPICUM L. GR. GILO-ANGUIVI		NO	NO
MM 00980 BIS	BIRM/S.1339	1991	Uganda	LESTER-BIRMINGHAM UNIV.	Aubergine	Solanum	LEPTOSTEMONUM	AETHIOPICUM L. GR. GILO-ANGUIVI		NO	NO
MM 00981	BIRM/S.1381/NTULA NGANDA	1991	Uganda	LESTER-BIRMINGHAM UNIV.	Aubergine	Solanum	LEPTOSTEMONUM	AETHIOPICUM L. GR. GILO		NO	NO
MM 00981 BIS	BIRM/S.1381	1991	Uganda	LESTER-BIRMINGHAM UNIV.	Aubergine	Solanum	LEPTOSTEMONUM	AETHIOPICUM L. GR. GILO		NO	NO
MM 00982	BIRM/S.0048	1991	Madagascar	LESTER-BIRMINGHAM UNIV.	Aubergine	Solanum	LEPTOSTEMONUM	ANGUIVI AGG.	Wild	NO	NO
MM 00983	BIRM/S.2011	1991	United Republic of Tanzania	LESTER-BIRMINGHAM UNIV.	Aubergine	Solanum	LEPTOSTEMONUM	ANGUIVI AGG.	Wild	NO	YES
MM 00984	BIRM/S.2317	1991	South Africa	LESTER-BIRMINGHAM UNIV.	Aubergine	Solanum	LEPTOSTEMONUM	ANGUIVI AGG.	Wild	NO	NO
MM 00985	BIRM/S.2491	1991	South Africa	LESTER-BIRMINGHAM UNIV.	Aubergine	Solanum	LEPTOSTEMONUM	ANGUIVI AGG.	Wild	NO	NO
MM 00987	BIRM/S.2483	1991	South Africa	LESTER-BIRMINGHAM UNIV.	Aubergine	Solanum	LEPTOSTEMONUM	BURCHELLII DUNAL	Wild	NO	YES
MM 00989	BIRM/S.1689	1991	South Africa	LESTER-BIRMINGHAM UNIV.	Aubergine	Solanum	LEPTOSTEMONUM	CAPENSE L.	Wild	NO	NO
MM 00990	BIRM/S.2018	1991	UNKNOWN	LESTER-BIRMINGHAM UNIV.	Aubergine	Solanum	LEPTOSTEMONUM	COAGULANS FORSSK.	Wild	NO	NO
MM 00991	BIRM/S.2505	1991	Saudi Arabia	LESTER-BIRMINGHAM UNIV.	Aubergine	Solanum	LEPTOSTEMONUM	COAGULANS FORSSK.	Wild	NO	NO
MM 00992	BIRM/S.1697	1991	South Africa	LESTER-BIRMINGHAM UNIV.	Aubergine	Solanum	LEPTOSTEMONUM	COCCINEUM JACQ. (TOMENTOSUM?)	Wild	NO	NO
MM 00993	BIRM/S.1775	1991	South Africa	LESTER-BIRMINGHAM UNIV.	Aubergine	Solanum	LEPTOSTEMONUM	COCCINEUM JACQ.	Wild	NO	NO
MM 00994	BIRM/S.2065	1991	UNKNOWN	LESTER-BIRMINGHAM UNIV.	Aubergine	Solanum	LEPTOSTEMONUM	CYANEO-PURPUREUM DE WILD	Wild	NO	YES
MM 00995	BIRM/S.2066	1991	UNKNOWN	JARDIN BOTANIQUE-LIEGE	Aubergine	Solanum	LEPTOSTEMONUM	MACROCARPON L.		NO	NO
MM 00996	BIRM/S.1791	1991	South Africa	LESTER-BIRMINGHAM UNIV.	Aubergine	Solanum	LEPTOSTEMONUM	GIFTBERGENSE DUNAL	Wild	NO	NO
MM 00997	BIRM/S.1792	1991	UNKNOWN	LESTER-BIRMINGHAM UNIV.	Aubergine	Solanum	LEPTOSTEMONUM	GIGANTEUM JACQ.	Wild	NO	NO
MM 00998	BIRM/S.1779	1991	United Republic of Tanzania	LESTER-BIRMINGHAM UNIV.	Aubergine	Solanum	LEPTOSTEMONUM	GOETZEI DAMMER	Wild	NO	YES
MM 01000	BIRM/S.0871	1991	Uganda	LESTER-BIRMINGHAM UNIV.	Aubergine	Solanum	LEPTOSTEMONUM	AETHIOPICUM L. GR. GILO-ANGUIVI		NO	NO
MM 01000 BIS	BIRM/S.0871	1991	Uganda	LESTER-BIRMINGHAM UNIV.	Aubergine	Solanum	LEPTOSTEMONUM	AETHIOPICUM L. GR. GILO-ANGUIVI		NO	NO
MM 01001	BIRM/S.2020	1991	UNKNOWN	LESTER-BIRMINGHAM UNIV.	Aubergine	Solanum	LEPTOSTEMONUM	INDICUM SP.	Wild	NO	NO
MM 01002	BIRM/S.1770	1991	UNKNOWN	LESTER-BIRMINGHAM UNIV.	Aubergine			A DETERMINER		NO	NO
MM 01003	BIRM/S.1944	1991	Indonesia	LESTER-BIRMINGHAM UNIV.	Aubergine	Solanum	LEPTOSTEMONUM	KURZII BRACE & PRAIN	Wild	NO	NO
MM 01005	BIRM/S.2090	1991	Spain	LESTER-BIRMINGHAM UNIV.	Aubergine	Solanum	LEPTOSTEMONUM	LIDII SUNDING	Wild	NO	YES
MM 01006	BIRM/S.0210	1991	Australia	LESTER-BIRMINGHAM UNIV.	Aubergine	Solanum	LEPTOSTEMONUM	LINNAEANUM HEPPER & JAEGER	Wild	NO	NO
MM 01007	BIRM/S.0133	1991	UNKNOWN	JARDIN BOTANIQUE-BRUXELLES	Aubergine	Solanum	LEPTOSTEMONUM	MACROCARPON L.		NO	NO
MM 01008	BIRM/S.0256	1991	Mexico	LESTER-BIRMINGHAM UNIV.	Aubergine	Solanum	LEPTOSTEMONUM	MARGINATUM L. FIL.	Wild	NO	NO
MM 01010	BIRM/S.2389	1991	Malaysia	LESTER-BIRMINGHAM UNIV.	Aubergine	Solanum	LEPTOSTEMONUM	MELONGENA L. (GROUPE G)		NO	NO
MM 01013	BIRM/S.2060	1991	Malawi	LESTER-BIRMINGHAM UNIV.	Aubergine	Solanum	LEPTOSTEMONUM	INCANUM L. (GROUPE B)	Wild	NO	NO
MM 01014	BIRM/S.0926	1991	Madagascar	LESTER-BIRMINGHAM UNIV.	Aubergine	Solanum	LEPTOSTEMONUM	PYRACANTHOS LAM.	Wild	NO	YES
MM 01015	BIRM/S.1774	1991	UNKNOWN	LESTER-BIRMINGHAM UNIV.	Aubergine	Solanum	LEPTOSTEMONUM	RENSCHII VATKE	Wild	NO	NO
MM 01017	BIRM/S.2504	1991	Comoros	LESTER-BIRMINGHAM UNIV.	Aubergine	Solanum	LEPTOSTEMONUM	RICHARDII DUNAL	Wild	NO	NO
MM 01018	BIRM/S.1690	1991	South Africa	LESTER-BIRMINGHAM UNIV.	Aubergine	Solanum	LEPTOSTEMONUM	RUBETORUM ?	Wild	NO	YES
MM 01019	BIRM/S.1695	1991	South Africa	LESTER-BIRMINGHAM UNIV.	Aubergine	Solanum	LEPTOSTEMONUM	RUBETORUM DUNAL (RIGESCENS ?)	Wild	NO	NO
MM 01020	BIRM/S.1794	1991	Ethiopia	LESTER-BIRMINGHAM UNIV.	Aubergine	Solanum	LEPTOSTEMONUM	SCHIMPERIANUM HOCHST.	Wild	NO	NO
MM 01021	BIRM/S.1500	1991	South Africa	LESTER-BIRMINGHAM UNIV.	Aubergine	Solanum	LEPTOSTEMONUM	LINNAEANUM-FUSCATUM-CERASIFERUM (?)	Wild	NO	NO
MM 01021 BIS	BIRM/S.1500	1999	South Africa	LESTER-BIRMINGHAM UNIV.	Aubergine	Solanum	LEPTOSTEMONUM	FUSCATUM-CERASIFERUM (?)	Wild	NO	NO
MM 01021 TER	BIRM/S.1500	1999	South Africa	LESTER-BIRMINGHAM UNIV.	Aubergine	Solanum	LEPTOSTEMONUM	FUSCATUM-LINNAEANUM	Wild	NO	NO
MM 01022	BIRM/S.2463	1991	South Africa	LESTER-BIRMINGHAM UNIV.	Aubergine	Solanum	LEPTOSTEMONUM	SUPINUM DUNAL	Wild	NO	YES
MM 01024	BIRM/S.0927	1991	UNKNOWN	JARDIN BOTANIQUE-ST JEAN CAP FERRAT	Aubergine	Solanum	LEPTOSTEMONUM	TOMENTOSUM L.	Wild	NO	NO
MM 01025	BIRM/S.1962	1991	Sri Lanka	LESTER-BIRMINGHAM UNIV.	Aubergine	Solanum	LEPTOSTEMONUM	TRILOBATUM L.	Wild	NO	YES
MM 01026	BIRM/S.2091	1991	Spain	LESTER-BIRMINGHAM UNIV.	Aubergine	Solanum	LEPTOSTEMONUM	VESPERTILIO AIT.	Wild	NO	YES
MM 01027	BIRM/S.1489	1991	India	LESTER-BIRMINGHAM UNIV.	Aubergine	Solanum	LEPTOSTEMONUM	VIOLACEUM ORT.	Wild	NO	NO
MM 01028	BIRM/S.2309	1991	Madagascar	LESTER-BIRMINGHAM UNIV.	Aubergine	Solanum	LEPTOSTEMONUM	VIOLACEUM ORT.	Wild	NO	NO
MM 01029	BIRM/S.1389	1991	India	LESTER-BIRMINGHAM UNIV.	Aubergine	Solanum	LEPTOSTEMONUM	VIRGINIANUM L.	Wild	NO	NO
MM 01034	BIRM/S.2188	1991	Australia	LESTER-BIRMINGHAM UNIV.	Aubergine	Solanum	LEPTOSTEMONUM	BEAUGLEHOLEI SYMON	Wild	NO	NO
MM 01035	BIRM/S.2201	1991	Australia	LESTER-BIRMINGHAM UNIV.	Aubergine	Solanum	LEPTOSTEMONUM	CHIPPENDALEI SYMON	Wild	NO	NO
MM 01037	BIRM/S.0202	1991	Australia	LESTER-BIRMINGHAM UNIV.	Aubergine	Solanum	LEPTOSTEMONUM	CINEREUM R. BR.	Wild	NO	YES
MM 01038	BIRM/S.1437 (S.2222 RADIE EN 2003 CAR DUPLICATA)	1991	Australia	LESTER-BIRMINGHAM UNIV.	Aubergine	Solanum	LEPTOSTEMONUM	DIVERSIFLORUM F. J. MUELL.	Wild	NO	NO
MM 01044	AG 91-31 (SAFCN 5-2)	1991	Guadeloupe	INRAE	Aubergine	Solanum		melongena		NO	NO
MM 01045	AG 91-32 (OR 05)	1991	Guadeloupe	INRAE	Aubergine	Solanum		melongena		NO	NO
MM 01046	AG 91-33 (VERT ST FELIX)	1991	Guadeloupe	INRAE	Aubergine	Solanum		melongena		NO	NO
MM 01047	IADIZA NI1417	1991	Argentina	TRIONE-I.A.D.I.Z.A.	Aubergine	Solanum	LEPTOSTEMONUM	ELAEAGNIFOLIUM CAV.	Wild	NO	NO
MM 01048	RNL 011	1991	Benin	LESTER-BIRMINGHAM UNIV.	Aubergine	Solanum	LEPTOSTEMONUM	AETHIOPICUM L. GR. GILO		NO	YES
MM 01049	RNL 017/AGBITSA	1991	Benin	LESTER-BIRMINGHAM UNIV.	Aubergine	Solanum	LEPTOSTEMONUM	AETHIOPICUM L. GR. GILO		NO	NO
MM 01050	RNL 018/AGBITSA	1991	Benin	LESTER-BIRMINGHAM UNIV.	Aubergine	Solanum	LEPTOSTEMONUM	AETHIOPICUM L. GR. GILO		NO	NO
MM 01051	RNL 021	1991	Benin	LESTER-BIRMINGHAM UNIV.	Aubergine	Solanum	LEPTOSTEMONUM	AETHIOPICUM L. GR. GILO		NO	NO
MM 01052	RNL 135	1991	Togo	LESTER-BIRMINGHAM UNIV.	Aubergine			A DETERMINER		NO	NO
MM 01054	RNL 168	1991	Uganda	LESTER-BIRMINGHAM UNIV.	Aubergine			A DETERMINER		NO	NO
MM 01055	RNL 180	1991	Burkina Faso	LESTER-BIRMINGHAM UNIV.	Aubergine	Solanum	LEPTOSTEMONUM	AETHIOPICUM L. GR. GILO		NO	NO
MM 01056	RNL 196	1991	Burkina Faso	LESTER-BIRMINGHAM UNIV.	Aubergine	Solanum	LEPTOSTEMONUM	AETHIOPICUM L. GR. GILO		NO	NO
MM 01057	RNL 197/DAMSA (DIOULA)	1991	Burkina Faso	LESTER-BIRMINGHAM UNIV.	Aubergine	Solanum	LEPTOSTEMONUM	AETHIOPICUM L. GR. GILO-ANGUIVI		NO	NO
MM 01058	RNL 228	1991	Ghana	LESTER-BIRMINGHAM UNIV.	Aubergine			A DETERMINER		NO	NO
MM 01059	RNL 229	1991	Ghana	LESTER-BIRMINGHAM UNIV.	Aubergine			A DETERMINER		NO	NO
MM 01060	RNL 245	1991	Ghana	LESTER-BIRMINGHAM UNIV.	Aubergine			A DETERMINER		NO	NO
MM 01061	RNL 251	1991	Ghana	LESTER-BIRMINGHAM UNIV.	Aubergine			A DETERMINER		NO	NO
MM 01062	RNL 252A/NYADOA (DAGBANI)	1991	Ghana	LESTER-BIRMINGHAM UNIV.	Aubergine	Solanum	LEPTOSTEMONUM	AETHIOPICUM L. GR. GILO		NO	YES
MM 01063	RNL 252B	1991	Ghana	LESTER-BIRMINGHAM UNIV.	Aubergine	Solanum	LEPTOSTEMONUM	AETHIOPICUM L. GR. GILO		NO	NO
MM 01064	RNL 253/NYADOA (DAGBANI)	1991	Ghana	LESTER-BIRMINGHAM UNIV.	Aubergine	Solanum	LEPTOSTEMONUM	AETHIOPICUM L. GR. GILO		NO	NO
MM 01065	RNL 254	1991	Ghana	LESTER-BIRMINGHAM UNIV.	Aubergine			A DETERMINER		NO	NO
MM 01066	RNL 255A/NYADOA (DAGBANI)	1991	Ghana	LESTER-BIRMINGHAM UNIV.	Aubergine	Solanum	LEPTOSTEMONUM	AETHIOPICUM L. GR. GILO		NO	NO
MM 01067	RNL 255B	1991	Ghana	LESTER-BIRMINGHAM UNIV.	Aubergine			A DETERMINER		NO	NO
MM 01068	RNL 257	1991	Ghana	LESTER-BIRMINGHAM UNIV.	Aubergine			A DETERMINER		NO	NO
MM 01069	RNL 258/NYADOA (DAGBANI)	1991	Ghana	LESTER-BIRMINGHAM UNIV.	Aubergine	Solanum	LEPTOSTEMONUM	AETHIOPICUM L. GR. GILO		NO	NO
MM 01070	RNL 270	1991	Ghana	LESTER-BIRMINGHAM UNIV.	Aubergine			A DETERMINER		NO	NO
MM 01071	RNL 271	1991	Ghana	LESTER-BIRMINGHAM UNIV.	Aubergine			A DETERMINER		NO	NO
MM 01072	RNL 273	1991	Ghana	LESTER-BIRMINGHAM UNIV.	Aubergine			A DETERMINER		NO	NO
MM 01074	RNL 285	1991	Ghana	LESTER-BIRMINGHAM UNIV.	Aubergine			A DETERMINER		NO	NO
MM 01075	RNL 286	1991	Ghana	LESTER-BIRMINGHAM UNIV.	Aubergine	Solanum	LEPTOSTEMONUM	AETHIOPICUM L. GR. GILO		NO	NO
MM 01077	RNL 292	1991	Ghana	LESTER-BIRMINGHAM UNIV.	Aubergine			A DETERMINER		NO	NO
MM 01078	RNL 293/NSUSUA (TWI)	1991	Ghana	LESTER-BIRMINGHAM UNIV.	Aubergine	Solanum	LEPTOSTEMONUM	AETHIOPICUM L. GR. GILO-ANGUIVI		NO	NO
MM 01079	RNL 294	1991	Ghana	LESTER-BIRMINGHAM UNIV.	Aubergine			A DETERMINER		NO	NO
MM 01080	RNL 295/NTOTOMTWEDEE (TWI)	1991	Ghana	LESTER-BIRMINGHAM UNIV.	Aubergine	Solanum	LEPTOSTEMONUM	AETHIOPICUM L. GR. GILO		NO	NO
MM 01081	RNL 296/NYADOA (TWI)	1991	Ghana	LESTER-BIRMINGHAM UNIV.	Aubergine	Solanum	LEPTOSTEMONUM	AETHIOPICUM L. GR. GILO		NO	NO
MM 01082	RNL 297/NYADOA (TWI)	1991	Ghana	LESTER-BIRMINGHAM UNIV.	Aubergine	Solanum	LEPTOSTEMONUM	AETHIOPICUM L. GR. GILO		NO	NO
MM 01083	RNL 300/KATRE (GONJA)	1991	Ghana	LESTER-BIRMINGHAM UNIV.	Aubergine	Solanum	LEPTOSTEMONUM	AETHIOPICUM L. GR. GILO		NO	NO
MM 01084	RNL 307	1991	Ghana	LESTER-BIRMINGHAM UNIV.	Aubergine	Solanum	LEPTOSTEMONUM	AETHIOPICUM L. GR. GILO		NO	NO
MM 01085	RNL 309	1991	Ghana	LESTER-BIRMINGHAM UNIV.	Aubergine			A DETERMINER		NO	NO
MM 01086	RNL 310	1991	Ghana	LESTER-BIRMINGHAM UNIV.	Aubergine	Solanum	LEPTOSTEMONUM	AETHIOPICUM L. GR. GILO		NO	NO
MM 01087	RNL 314/NTROABA (FANTI)	1991	Ghana	LESTER-BIRMINGHAM UNIV.	Aubergine	Solanum	LEPTOSTEMONUM	AETHIOPICUM L. GR. GILO		NO	NO
MM 01088	RNL 315	1991	Ghana	LESTER-BIRMINGHAM UNIV.	Aubergine			A DETERMINER		NO	NO
MM 01089	RNL 316	1991	Ghana	LESTER-BIRMINGHAM UNIV.	Aubergine			A DETERMINER		NO	NO
MM 01090	RNL 341	1991	Zambia	LESTER-BIRMINGHAM UNIV.	Aubergine			A DETERMINER		NO	NO
MM 01091	RNL 345	1991	Zambia	LESTER-BIRMINGHAM UNIV.	Aubergine	Solanum	LEPTOSTEMONUM	AETHIOPICUM L. GR. GILO		NO	NO
MM 01093	BIRM/S.2001	1991	Nigeria	LESTER-BIRMINGHAM UNIV.	Aubergine	Solanum	LEPTOSTEMONUM	AETHIOPICUM L. GR. GILO		NO	NO
MM 01094	BIRM/S.2004	1991	Nigeria	LESTER-BIRMINGHAM UNIV.	Aubergine			A DETERMINER		NO	NO
MM 01095	BIRM/S.1234	1991	UNKNOWN	JARDIN BOTANIQUE-ST JEAN CAP FERRAT	Aubergine	Solanum	LEPTOSTEMONUM	AETHIOPICUM L. GR. GILO		NO	NO
MM 01096	RNL 170	1991	Burkina Faso	LESTER-BIRMINGHAM UNIV.	Aubergine	Solanum	LEPTOSTEMONUM	AETHIOPICUM L. GR. KUMBA	Traditional cultivar	NO	YES
MM 01097	RNL 175	1991	Burkina Faso	LESTER-BIRMINGHAM UNIV.	Aubergine	Solanum	LEPTOSTEMONUM	AETHIOPICUM L. GR. KUMBA		NO	NO
MM 01098	RNL 176	1991	Burkina Faso	LESTER-BIRMINGHAM UNIV.	Aubergine	Solanum	LEPTOSTEMONUM	AETHIOPICUM L. GR. KUMBA		NO	NO
MM 01099	RNL 181/KUMBA (MOSSI)	1991	Burkina Faso	LESTER-BIRMINGHAM UNIV.	Aubergine	Solanum	LEPTOSTEMONUM	AETHIOPICUM L. GR. KUMBA		NO	NO
MM 01100	RNL 183	1991	Burkina Faso	LESTER-BIRMINGHAM UNIV.	Aubergine	Solanum	LEPTOSTEMONUM	AETHIOPICUM L. GR. KUMBA		NO	YES
MM 01101	RNL 186	1991	Burkina Faso	LESTER-BIRMINGHAM UNIV.	Aubergine	Solanum	LEPTOSTEMONUM	AETHIOPICUM L. GR. GILO-ANGUIVI		NO	YES
MM 01102	RNL 187/KUMBA (MOSSI)	1991	Burkina Faso	LESTER-BIRMINGHAM UNIV.	Aubergine	Solanum	LEPTOSTEMONUM	AETHIOPICUM L. GR. ACULEATUM	Traditional cultivar	NO	YES
MM 01103	RNL 190/BOALA (TOUSSIAN)	1991	Burkina Faso	LESTER-BIRMINGHAM UNIV.	Aubergine	Solanum	LEPTOSTEMONUM	AETHIOPICUM L. GR. KUMBA		NO	NO
MM 01104	RNL 193/FILO,BOLE (GOIN)	1991	Burkina Faso	LESTER-BIRMINGHAM UNIV.	Aubergine	Solanum	LEPTOSTEMONUM	AETHIOPICUM L. GR. KUMBA		NO	NO
MM 01105	RNL 200/PANNIYA (TUREA)	1991	Burkina Faso	LESTER-BIRMINGHAM UNIV.	Aubergine	Solanum	LEPTOSTEMONUM	AETHIOPICUM L. GR. KUMBA		NO	NO
MM 01106	RNL 201/PANNIYA (TUREA)	1991	Burkina Faso	LESTER-BIRMINGHAM UNIV.	Aubergine	Solanum	LEPTOSTEMONUM	AETHIOPICUM L. GR. KUMBA		NO	NO
MM 01107	RNL 204/KPABI (VIGUE)	1991	Burkina Faso	LESTER-BIRMINGHAM UNIV.	Aubergine	Solanum	LEPTOSTEMONUM	AETHIOPICUM L. GR. KUMBA	Traditional cultivar	NO	YES
MM 01108	RNL 205/KAOCO (VIGUE)	1991	Burkina Faso	LESTER-BIRMINGHAM UNIV.	Aubergine	Solanum	LEPTOSTEMONUM	AETHIOPICUM L. GR. KUMBA		NO	NO
MM 01109	RNL 206/KEREBIE (DIAN)	1991	Burkina Faso	LESTER-BIRMINGHAM UNIV.	Aubergine	Solanum	LEPTOSTEMONUM	AETHIOPICUM L. GR. KUMBA		NO	NO
MM 01109 BIS	RNL 206 BIS/KEREBIE (DIAN)	1991	Burkina Faso	LESTER-BIRMINGHAM UNIV.	Aubergine	Solanum	LEPTOSTEMONUM	AETHIOPICUM L. GR. KUMBA		NO	NO
MM 01110	RNL 209	1991	Burkina Faso	LESTER-BIRMINGHAM UNIV.	Aubergine	Solanum	LEPTOSTEMONUM	AETHIOPICUM L. GR. KUMBA	Traditional cultivar	NO	YES
MM 01111	RNL 210	1991	Burkina Faso	LESTER-BIRMINGHAM UNIV.	Aubergine	Solanum	LEPTOSTEMONUM	AETHIOPICUM L. GR. KUMBA		NO	YES
MM 01112	RNL 214	1991	Burkina Faso	LESTER-BIRMINGHAM UNIV.	Aubergine	Solanum	LEPTOSTEMONUM	AETHIOPICUM L. GR. KUMBA	Traditional cultivar	NO	YES
MM 01113	RNL 219	1991	Burkina Faso	LESTER-BIRMINGHAM UNIV.	Aubergine	Solanum	LEPTOSTEMONUM	AETHIOPICUM L. GR. KUMBA	Traditional cultivar	NO	YES
MM 01114	RNL 220/BASSENE (SAMO)	1991	Burkina Faso	LESTER-BIRMINGHAM UNIV.	Aubergine	Solanum	LEPTOSTEMONUM	AETHIOPICUM L. GR. KUMBA		NO	NO
MM 01115	RNL 221	1991	Burkina Faso	LESTER-BIRMINGHAM UNIV.	Aubergine	Solanum	LEPTOSTEMONUM	AETHIOPICUM L. GR. KUMBA	Traditional cultivar	NO	YES
MM 01115 BIS	RNL 221	2015	Burkina Faso	LESTER-BIRMINGHAM UNIV.	Aubergine	Solanum	LEPTOSTEMONUM	AETHIOPICUM L. GR KUMBA		NO	NO
MM 01116	RNL 222	1991	Burkina Faso	LESTER-BIRMINGHAM UNIV.	Aubergine	Solanum	LEPTOSTEMONUM	AETHIOPICUM L. GR. KUMBA	Traditional cultivar	NO	YES
MM 01117	RNL 223	1991	Burkina Faso	LESTER-BIRMINGHAM UNIV.	Aubergine	Solanum	LEPTOSTEMONUM	AETHIOPICUM L. GR. KUMBA		NO	NO
MM 01118	RNL 302/KATRE (GONJA)	1991	Ghana	LESTER-BIRMINGHAM UNIV.	Aubergine	Solanum	LEPTOSTEMONUM	AETHIOPICUM L. GR. GILO		NO	NO
MM 01119	RNL 134	1991	Togo	LESTER-BIRMINGHAM UNIV.	Aubergine	Solanum	LEPTOSTEMONUM	AETHIOPICUM L. GR. SHUM	Traditional cultivar	NO	YES
MM 01120	RNL 159	1991	Uganda	LESTER-BIRMINGHAM UNIV.	Aubergine			A DETERMINER		NO	NO
MM 01121	RNL 340/KAREETE	1991	Zambia	LESTER-BIRMINGHAM UNIV.	Aubergine	Solanum	LEPTOSTEMONUM	AETHIOPICUM L. GR. SHUM		NO	YES
MM 01122	RNL 343/KATETE	1991	Zambia	LESTER-BIRMINGHAM UNIV.	Aubergine	Solanum	LEPTOSTEMONUM	AETHIOPICUM L. GR. SHUM		NO	NO
MM 01123	RNL 344	1991	Zambia	LESTER-BIRMINGHAM UNIV.	Aubergine	Solanum	LEPTOSTEMONUM	AETHIOPICUM L. GR. SHUM		NO	NO
MM 01124	RNL 147	1991	Côte d'Ivoire	LESTER-BIRMINGHAM UNIV.	Aubergine	Solanum	LEPTOSTEMONUM	AETHIOPICUM L. GR. GILO-ANGUIVI		NO	NO
MM 01124 BIS	RNL 147	1991	Côte d'Ivoire	LESTER-BIRMINGHAM UNIV.	Aubergine	Solanum	LEPTOSTEMONUM	AETHIOPICUM L. GR. GILO-ANGUIVI		NO	NO
MM 01125	RNL 303/KATRE (GONJA)	1991	Ghana	LESTER-BIRMINGHAM UNIV.	Aubergine			A DETERMINER		NO	NO
MM 01126	RNL 305/KATRE (GONJA)	1991	Ghana	LESTER-BIRMINGHAM UNIV.	Aubergine	Solanum		melongena		NO	NO
MM 01127	RNL 001	1991	Benin	LESTER-BIRMINGHAM UNIV.	Aubergine	Solanum	LEPTOSTEMONUM	MACROCARPON L.		NO	NO
MM 01128	RNL 008	1991	Benin	LESTER-BIRMINGHAM UNIV.	Aubergine			A DETERMINER		NO	NO
MM 01129	RNL 037	1991	Togo	LESTER-BIRMINGHAM UNIV.	Aubergine	Solanum	LEPTOSTEMONUM	MACROCARPON L.		NO	NO
MM 01130	RNL 052	1991	Togo	LESTER-BIRMINGHAM UNIV.	Aubergine	Solanum	LEPTOSTEMONUM	MACROCARPON L.		NO	NO
MM 01131	RNL 053	1991	Togo	LESTER-BIRMINGHAM UNIV.	Aubergine	Solanum	LEPTOSTEMONUM	MACROCARPON L.		NO	NO
MM 01132	RNL 062/GBOMA (LOSSO)	1991	Togo	LESTER-BIRMINGHAM UNIV.	Aubergine	Solanum	LEPTOSTEMONUM	MACROCARPON L.	Traditional cultivar	NO	YES
MM 01133	RNL 082/GBOMA (AKPOSSO)	1991	Togo	LESTER-BIRMINGHAM UNIV.	Aubergine	Solanum	LEPTOSTEMONUM	MACROCARPON L.		NO	NO
MM 01134	RNL 096/IVT 687	1991	Togo	LESTER-BIRMINGHAM UNIV.	Aubergine	Solanum	LEPTOSTEMONUM	DASYPHYLLUM/MACROCARPON	Wild	NO	NO
MM 01135	RNL 131/GBOMA	1991	Togo	LESTER-BIRMINGHAM UNIV.	Aubergine	Solanum	LEPTOSTEMONUM	MACROCARPON L.		NO	NO
MM 01136	RNL 237	1991	Ghana	LESTER-BIRMINGHAM UNIV.	Aubergine	Solanum	LEPTOSTEMONUM	MACROCARPON L.		NO	NO
MM 01137	RNL 004	1991	Benin	LESTER-BIRMINGHAM UNIV.	Aubergine	Solanum	LEPTOSTEMONUM	DASYPHYLLUM THONN.	Wild	NO	YES
MM 01138	RNL 034	1991	Benin	LESTER-BIRMINGHAM UNIV.	Aubergine	Solanum	LEPTOSTEMONUM	MACROCARPON L.		NO	NO
MM 01139	RNL 192	1991	Burkina Faso	LESTER-BIRMINGHAM UNIV.	Aubergine			A DETERMINER		NO	NO
MM 01140	RNL 438	1991	Nigeria	LESTER-BIRMINGHAM UNIV.	Aubergine	Solanum	LEPTOSTEMONUM	AETHIOPICUM L. GR. GILO		NO	NO
MM 01141	RNL 454	1991	Nigeria	LESTER-BIRMINGHAM UNIV.	Aubergine	Solanum	LEPTOSTEMONUM	AETHIOPICUM L. GR. GILO		NO	NO
MM 01142	RNL 464	1991	Nigeria	LESTER-BIRMINGHAM UNIV.	Aubergine	Solanum	LEPTOSTEMONUM	AETHIOPICUM L. GR. GILO		NO	NO
MM 01143	RNL 466	1991	Nigeria	LESTER-BIRMINGHAM UNIV.	Aubergine	Solanum	LEPTOSTEMONUM	AETHIOPICUM L. GR. GILO		NO	NO
MM 01144	RNL 476	1991	Nigeria	LESTER-BIRMINGHAM UNIV.	Aubergine	Solanum	LEPTOSTEMONUM	MACROCARPON L.		NO	NO
MM 01145	RNL 487	1991	Nigeria	LESTER-BIRMINGHAM UNIV.	Aubergine			A DETERMINER		NO	NO
MM 01147	RNL 327	1991	Zimbabwe	LESTER-BIRMINGHAM UNIV.	Aubergine	Solanum	LEPTOSTEMONUM	DASYPHYLLUM THONN.	Wild	NO	NO
MM 01148	RNL 126/GBOMA (EWE)	1991	Togo	LESTER-BIRMINGHAM UNIV.	Aubergine	Solanum	LEPTOSTEMONUM	MACROCARPON L.		NO	NO
MM 01150	RNL 023/IMENT (LDATSA)	1991	Benin	LESTER-BIRMINGHAM UNIV.	Aubergine	Solanum	LEPTOSTEMONUM	AETHIOPICUM L. GR. GILO		NO	NO
MM 01151	RNL 169	1991	Uganda	LESTER-BIRMINGHAM UNIV.	Aubergine			A DETERMINER		NO	NO
MM 01152	(BUKENYA 119)	1991	Uganda	LESTER-BIRMINGHAM UNIV.	Aubergine	Solanum	LEPTOSTEMONUM	INCANUM L. (GROUPE A)	Wild	NO	NO
MM 01153	(BUKENYA 118)	1991	Uganda	BUKENYA-MAKERERE UNIV.	Aubergine	Solanum	LEPTOSTEMONUM	DASYPHYLLUM THONN.	Wild	NO	YES
MM 01154	NGORONGORO	1991	United Republic of Tanzania	EVERS-SOKOINE UNIV. OF AGRIC.-MOROGORO	Aubergine	Solanum	LEPTOSTEMONUM	ACULEASTRUM DUNAL	Wild	NO	NO
MM 01155	NGORONGORO BATTER	1991	United Republic of Tanzania	EVERS-SOKOINE UNIV. OF AGRIC.-MOROGORO	Aubergine	Solanum	LEPTOSTEMONUM	INCANUM L. (GROUPE A)	Wild	NO	NO
MM 01156	AUBERGINE SAUVAGE	1991	Indonesia	CLAUSE SEMENCES	Aubergine			A DETERMINER		NO	NO
MM 01158	BIRM/S.0240	1991	UNKNOWN	JARDIN BOTANIQUE UNIV. MONTPELLIER	Aubergine	Solanum	LEPTOSTEMONUM	AETHIOPICUM L. GR. ACULEATUM		NO	YES
MM 01159	BIRM/S.1331	1991	UNKNOWN	LESTER-BIRMINGHAM UNIV.	Aubergine	Solanum	LEPTOSTEMONUM	AETHIOPICUM L. GR. ACULEATUM		NO	NO
MM 01160	RNL 022/IMENT (LDATSA)	1991	Benin	LESTER-BIRMINGHAM UNIV.	Aubergine	Solanum	LEPTOSTEMONUM	AETHIOPICUM L. GR. SHUM		NO	NO
MM 01161	RNL 024	1991	Benin	LESTER-BIRMINGHAM UNIV.	Aubergine	Solanum	LEPTOSTEMONUM	AETHIOPICUM L. GR. SHUM	Traditional cultivar	NO	YES
MM 01162	RNL 166	1991	Uganda	LESTER-BIRMINGHAM UNIV.	Aubergine	Solanum	LEPTOSTEMONUM	AETHIOPICUM L. GR. GILO		NO	YES
MM 01163	BIRM/S.1335	1991	Zimbabwe	LESTER-BIRMINGHAM UNIV.	Aubergine	Solanum	LEPTOSTEMONUM	ANGUIVI AGG.	Wild	NO	NO
MM 01163 BIS	BIRM/S.1335	1991	Zimbabwe	LESTER-BIRMINGHAM UNIV.	Aubergine	Solanum	LEPTOSTEMONUM	ANGUIVI AGG.	Wild	NO	NO
MM 01164	RNL 040	1991	Togo	LESTER-BIRMINGHAM UNIV.	Aubergine	Solanum	LEPTOSTEMONUM	DASYPHYLLUM THONN.	Wild	NO	NO
MM 01165	RNL 325	1991	Zimbabwe	LESTER-BIRMINGHAM UNIV.	Aubergine	Solanum	LEPTOSTEMONUM	DASYPHYLLUM THONN.	Wild	NO	YES
MM 01166	RNL 326/MHARUPWA	1991	Zimbabwe	LESTER-BIRMINGHAM UNIV.	Aubergine	Solanum	LEPTOSTEMONUM	DASYPHYLLUM THONN.	Wild	NO	YES
MM 01167	MAKERERE (BUKENYA S. 145)	1991	Uganda	BUKENYA-MAKERERE UNIV.	Aubergine	Solanum	LEPTOSTEMONUM	AETHIOPICUM L. GR. GILO-ANGUIVI		NO	NO
MM 01168	KAMPALA (BUKENYA S. 143)	1991	Uganda	BUKENYA-MAKERERE UNIV.	Aubergine	Solanum	LEPTOSTEMONUM	MAMMOSUM L.	Wild	NO	YES
MM 01169	MAKERERE (BUKENYA S. 140)	1991	Uganda	BUKENYA-MAKERERE UNIV.	Aubergine	Solanum	LEPTOSTEMONUM	ACULEASTRUM DUNAL	Wild	NO	NO
MM 01170	BUNDIBUGYO-RWENZORI (BUKENYA S. 144)	1991	Uganda	BUKENYA-MAKERERE UNIV.	Aubergine	Solanum	LEPTOSTEMONUM	ACULEATISSIMUM JACQ.	Wild	NO	NO
MM 01171	LARGA SANTA OLALLA (BGHZ 686)	1991	Spain	CARRAVEDO-SERV. DI INVESTIG. AGRARIA	Aubergine	Solanum		melongena		NO	YES
MM 01172	LARGA NEGRA PUEBLA DE GUZMAN (BGHZ 687)	1991	Spain	CARRAVEDO-SERV. DI INVESTIG. AGRARIA	Aubergine	Solanum		melongena		NO	YES
MM 01172 BIS	LARGA NEGRA PUEBLA DE GUZMAN (BGMZ 687)	1991	Spain	CARRAVEDO-SERV. DI INVESTIG. AGRARIA	Aubergine	Solanum		melongena		NO	NO
MM 01173	DEBRESINA-DESSIE (N░ 8350)	1991	Ethiopia	TADESSE-NATIONAL HERB.-ADDIS ABEBA	Aubergine	Solanum	LEPTOSTEMONUM	INCANUM L. (GROUPE C)	Wild	NO	NO
MM 01174	Nameless	1991	UNKNOWN	JOIGNY-S.E.I.T.A., INST. DU TABAC	Aubergine	Solanum	LEPTOSTEMONUM	CITRULLIFOLIUM A. BRAUN.	Wild	NO	NO
MM 01175	Nameless	1991	UNKNOWN	JOIGNY-S.E.I.T.A., INST. DU TABAC	Aubergine	Solanum	LEPTOSTEMONUM	ROSTRATUM DUNAL	Wild	NO	NO
MM 01176	Nameless	1991	UNKNOWN	JOIGNY-S.E.I.T.A., INST. DU TABAC	Aubergine	Solanum	SOLANUM	GRACILE DUNAL	Wild	NO	NO
MM 01177	Nameless	1991	UNKNOWN	JOIGNY-S.E.I.T.A., INST. DU TABAC	Aubergine	Solanum	SOLANUM	SCABRUM MILL.	Wild	NO	NO
MM 01178	Nameless	1991	UNKNOWN	JOIGNY-S.E.I.T.A., INST. DU TABAC	Aubergine	Solanum	SOLANUM	NIGRUM AGG.	Wild	NO	NO
MM 01179	Nameless	1991	UNKNOWN	JOIGNY-S.E.I.T.A., INST. DU TABAC	Aubergine	Solanum	SOLANUM	SCABRUM MILL.	Wild	NO	NO
MM 01180	Nameless	1991	UNKNOWN	JOIGNY-S.E.I.T.A., INST. DU TABAC	Aubergine	Solanum	SOLANUM	NIGRUM L.	Wild	NO	NO
MM 01181	Nameless	1991	UNKNOWN	JOIGNY-S.E.I.T.A., INST. DU TABAC	Aubergine	Solanum	SOLANUM	SCABRUM MILL.	Wild	NO	NO
MM 01182	Nameless	1991	UNKNOWN	JOIGNY-S.E.I.T.A., INST. DU TABAC	Aubergine	Solanum	SOLANUM	SCABRUM MILL.	Wild	NO	NO
MM 01183	Nameless	1991	UNKNOWN	JOIGNY-S.E.I.T.A., INST. DU TABAC	Aubergine	Solanum	SOLANUM	VILLOSUM MILL. SUBSP. VILLOSUM	Wild	NO	NO
MM 01184	Nameless	1991	UNKNOWN	JOIGNY-S.E.I.T.A., INST. DU TABAC	Aubergine			A DETERMINER		NO	NO
MM 01185	TIGE VIOLETTE	1991	UNKNOWN	JOIGNY-S.E.I.T.A., INST. DU TABAC	Aubergine	Solanum	LEPTOSTEMONUM	AETHIOPICUM L. GR. GILO		NO	NO
MM 01186	PIQUANT, TIGE BLANCHE	1991	UNKNOWN	JOIGNY-S.E.I.T.A., INST. DU TABAC	Aubergine	Solanum	LEPTOSTEMONUM	AETHIOPICUM L. GR. GILO		NO	NO
MM 01187	SANS PIQUANT, TIGE BLANCHE	1991	UNKNOWN	JOIGNY-S.E.I.T.A., INST. DU TABAC	Aubergine	Solanum	LEPTOSTEMONUM	AETHIOPICUM L. GR. GILO		NO	NO
MM 01188	Nameless	1991	UNKNOWN	JOIGNY-S.E.I.T.A., INST. DU TABAC	Aubergine	Solanum	LEPTOSTEMONUM	AETHIOPICUM L. GR. GILO		NO	NO
MM 01189	AG 91-30 (SD 02)	1991	Guadeloupe	INRAE	Aubergine	Solanum		melongena		NO	NO
MM 01190	(USDA PI 420 997)	1992	Netherlands	LOVELL-U.S.D.A.	Aubergine	Solanum	LEPTOSTEMONUM	ROSTRATUM DUNAL	Wild	NO	NO
MM 01191	JOFFREVILLE	1992	Madagascar	FOURY-E.N.S.H.	Aubergine	Solanum	LEPTOSTEMONUM	TORVUM SW.	Wild	NO	NO
MM 01192	DIEGO ANTSINANARA (MARCHE)	1992	Madagascar	FOURY-E.N.S.H.	Aubergine	Solanum	LEPTOSTEMONUM	MELONGENA L. (GROUPE F)	Wild	NO	NO
MM 01206	-4750117	1992	UNKNOWN	VAN DER WEERDEN	Aubergine	Solanum	MINON	CAPSICASTRUM LINK EX SCHAUER	Wild	NO	NO
MM 01207	GRAND MODELE	1992	Mali	NDIR-UNIV. CHEIKH ANTA DIOP	Aubergine	Solanum	LEPTOSTEMONUM	AETHIOPICUM L. GR. KUMBA		NO	NO
MM 01208	AUB. SAUVAGE CHIANG MAI	1992	Thailand	INRAE	Aubergine	Solanum	LEPTOSTEMONUM	VIARUM DUNAL	Wild	NO	NO
MM 01209	(PI 164757)	1992	United States of America	RAST-P.T.G.	Aubergine	Solanum		melongena		NO	YES
MM 01210	TOMATE LITCHI	1992	UNKNOWN	COOPERATIVE BIOL. FERME DE STE MARTHE	Aubergine	Solanum	LEPTOSTEMONUM	SISYMBRIFOLIUM LAM.	Wild	NO	NO
MM 01211	Nameless	1992	South Africa	GEVES	Aubergine	Solanum	LEPTOSTEMONUM	TOMENTOSUM L.	Wild	NO	NO
MM 01212	Nameless	1992	South Africa	GEVES	Aubergine	Solanum	LEPTOSTEMONUM	TOMENTOSUM L.	Wild	NO	NO
MM 01213	Nameless	1992	South Africa	GEVES	Aubergine	Solanum	LEPTOSTEMONUM	TOMENTOSUM L.	Wild	NO	YES
MM 01214	Nameless	1992	South Africa	GEVES	Aubergine	Solanum	LEPTOSTEMONUM	TOMENTOSUM L.	Wild	NO	NO
MM 012174	BIRM/S.1495	2004	India	LESTER-BIRMINGHAM UNIV.	Aubergine	Solanum		melongena		NO	NO
MM 01218	BIRM/S.2508	1992	Namibia	KOLBERG-UNIV.CUKUROVA-WINDHOEK	Aubergine	Solanum	LEPTOSTEMONUM	CATOMBELENSE PEYR.	Wild	NO	YES
MM 01220	BIRM/S.2510	1992	Namibia	KOLBERG-UNIV.CUKUROVA-WINDHOEK	Aubergine	Solanum	LEPTOSTEMONUM	CATOMBELENSE PEYR.	Wild	NO	NO
MM 01221	BIRM/S.2511	1992	Namibia	KOLBERG-UNIV.CUKUROVA-WINDHOEK	Aubergine	Solanum	LEPTOSTEMONUM	DINTERI BITTER	Wild	NO	YES
MM 01222	BIRM/S.2512	1992	Namibia	KOLBERG-UNIV.CUKUROVA-WINDHOEK	Aubergine	Solanum	LEPTOSTEMONUM	DINTERI BITTER	Wild	NO	NO
MM 01223	BIRM/S.2513	1992	Namibia	KOLBERG-UNIV.CUKUROVA-WINDHOEK	Aubergine	Solanum	LEPTOSTEMONUM	RIGESCENS JACQ.	Wild	NO	NO
MM 01224	BIRM/S.2514	1992	Namibia	KOLBERG-UNIV.CUKUROVA-WINDHOEK	Aubergine	Solanum	LEPTOSTEMONUM	RIGESCENS JACQ.	Wild	NO	NO
MM 01225	BIRM/S.2515	1992	Namibia	KOLBERG-UNIV.CUKUROVA-WINDHOEK	Aubergine	Solanum	LEPTOSTEMONUM	RIGESCENS JACQ.	Wild	NO	NO
MM 01226	BIRM/S.2516	1992	Namibia	KOLBERG-UNIV.CUKUROVA-WINDHOEK	Aubergine	Solanum	LEPTOSTEMONUM	RIGESCENTOIDES HUTCH.	Wild	NO	YES
MM 01227	BIRM/S.2517	1992	Namibia	KOLBERG-UNIV.CUKUROVA-WINDHOEK	Aubergine	Solanum	LEPTOSTEMONUM	RIGESCENTOIDES HUTCH.	Wild	NO	NO
MM 01228	BIRM/S.2518	1992	Namibia	KOLBERG-UNIV.CUKUROVA-WINDHOEK	Aubergine	Solanum	LEPTOSTEMONUM	RIGESCENTOIDES HUTCH.	Wild	NO	NO
MM 01230	BIRM/S.2520	1992	Namibia	KOLBERG-UNIV.CUKUROVA-WINDHOEK	Aubergine	Solanum	LEPTOSTEMONUM	RIGESCENTOIDES HUTCH.	Wild	NO	NO
MM 01233	BIRM/S.2523	1992	Namibia	KOLBERG-UNIV.CUKUROVA-WINDHOEK	Aubergine	Solanum	LEPTOSTEMONUM	SUPINUM DUNAL	Wild	NO	NO
MM 01234	BIRM/S.2524	1992	Namibia	KOLBERG-UNIV.CUKUROVA-WINDHOEK	Aubergine	Solanum	LEPTOSTEMONUM	SCHIMPERIANUM HOCHST.	Wild	NO	NO
MM 01235	BIRM/S.2525	1992	Namibia	KOLBERG-UNIV.CUKUROVA-WINDHOEK	Aubergine	Solanum	LEPTOSTEMONUM	BURCHELLII DUNAL	Wild	NO	NO
MM 01237	BIRM/S.2527	1992	Namibia	KOLBERG-UNIV.CUKUROVA-WINDHOEK	Aubergine	Solanum	LEPTOSTEMONUM	CAPENSE L.	Wild	NO	NO
MM 01238	BIRM/S.2528	1992	Namibia	KOLBERG-UNIV.CUKUROVA-WINDHOEK	Aubergine	Solanum	LEPTOSTEMONUM	CAPENSE L.	Wild	NO	NO
MM 01240	BIRM/S.2530	1992	Namibia	KOLBERG-UNIV.CUKUROVA-WINDHOEK	Aubergine	Solanum	LEPTOSTEMONUM	CAPENSE L.	Wild	NO	NO
MM 01241	BIRM/S.2531	1992	Namibia	KOLBERG-UNIV.CUKUROVA-WINDHOEK	Aubergine	Solanum	LEPTOSTEMONUM	CAPENSE L.	Wild	NO	NO
MM 01242	BIRM/S.2532	1992	Namibia	KOLBERG-UNIV.CUKUROVA-WINDHOEK	Aubergine	Solanum	LEPTOSTEMONUM	CATOMBELENSE PEYR.	Wild	NO	NO
MM 01244	BIRM/S.2534	1992	Namibia	KOLBERG-UNIV.CUKUROVA-WINDHOEK	Aubergine	Solanum	LEPTOSTEMONUM	INCANUM L. (GROUPE B)	Wild	NO	NO
MM 01246	BIRM/S.2536	1992	Namibia	KOLBERG-UNIV.CUKUROVA-WINDHOEK	Aubergine	Solanum	LEPTOSTEMONUM	SUPINUM DUNAL	Wild	NO	NO
MM 01247	BIRM/S.2537	1992	Namibia	KOLBERG-UNIV.CUKUROVA-WINDHOEK	Aubergine	Solanum	SOLANUM	GROSSEDENTATUM AFF. RICH.	Wild	NO	NO
MM 01248	BIRM/S.2538	1992	Namibia	KOLBERG-UNIV.CUKUROVA-WINDHOEK	Aubergine	Solanum	LEPTOSTEMONUM	INCANUM L. (GROUPE D)	Wild	NO	YES
MM 01249	BIRM/S.2539	1992	Namibia	KOLBERG-UNIV.CUKUROVA-WINDHOEK	Aubergine	Solanum	LEPTOSTEMONUM	INCANUM L. (GROUPE D)	Wild	NO	NO
MM 01250	BIRM/S.2540	1992	Namibia	KOLBERG-UNIV.CUKUROVA-WINDHOEK	Aubergine	Solanum	LEPTOSTEMONUM	INCANUM L. (GROUPE D)	Wild	NO	NO
MM 01251	BIRM/S.2541	1992	Namibia	KOLBERG-UNIV.CUKUROVA-WINDHOEK	Aubergine	Solanum	LEPTOSTEMONUM	INCANUM L. (GROUPE D)	Wild	NO	YES
MM 01252	BIRM/S.2542	1992	Namibia	KOLBERG-UNIV.CUKUROVA-WINDHOEK	Aubergine	Solanum	LEPTOSTEMONUM	INCANUM L. (GROUPE D)	Wild	NO	NO
MM 01253	BIRM/S.2543	1992	Namibia	KOLBERG-UNIV.CUKUROVA-WINDHOEK	Aubergine	Solanum	LEPTOSTEMONUM	INCANUM L. (GROUPE D)	Wild	NO	NO
MM 01254	BIRM/S.2544	1992	Namibia	KOLBERG-UNIV.CUKUROVA-WINDHOEK	Aubergine	Solanum	LEPTOSTEMONUM	INCANUM L. (GROUPE D)	Wild	NO	NO
MM 01258	AUBERGINE LOCALE SUMATRA	1992	Indonesia	CLAUSE SEMENCES	Aubergine	Solanum		melongena	Traditional cultivar	NO	YES
MM 01259	MENAGESHA AWRAJA (MT 9197)	1992	Ethiopia	TADESSE-NATIONAL HERB.-ADDIS ABEBA	Aubergine	Solanum	LEPTOSTEMONUM	ANGUIVI AGG.	Wild	NO	NO
MM 01260	BIRM/S.2548	1992	Namibia	KOLBERG-UNIV.CUKUROVA-WINDHOEK	Aubergine	Solanum	LEPTOSTEMONUM	CAPENSE L. (?)	Wild	NO	NO
MM 01261	GEZIRA 1	1992	Sudan	INRAE	Aubergine	Solanum	LEPTOSTEMONUM	COAGULANS FORSSK.	Wild	NO	NO
MM 01262	GEZIRA 2	1992	Sudan	INRAE	Aubergine	Withania		SOMNIFERA (L.) DUNAL		NO	NO
MM 01263	LANGADA	1993	Greece	BLETSOS-AGRIC. RES. CENTER OF NORTH. GREECE	Aubergine	Solanum		melongena		NO	YES
MM 01266	KAGAMEGA FOREST	1993	Kenya	DESNOYES-I.R.A.T.	Aubergine	Solanum	LEPTOSTEMONUM	INCANUM L. (GROUPE A)	Wild	NO	NO
MM 01267	OUEST	1993	Kenya	DESNOYES-I.R.A.T.	Aubergine	Solanum	LEPTOSTEMONUM	ANGUIVI AGG.	Wild	NO	NO
MM 01268	MONT ELGON	1993	Kenya	DESNOYES-I.R.A.T.	Aubergine	Solanum	LEPTOSTEMONUM	INCANUM L. (GROUPE A)	Wild	NO	NO
MM 01269	MONT ELGON	1993	Kenya	DESNOYES-I.R.A.T.	Aubergine	Solanum	LEPTOSTEMONUM	SESSILISTELLATUM BITTER	Wild	NO	NO
MM 01270	SKOUTARI	1993	Greece	GIAMOUSTARIS-AGRIC. RES. CENTRE OF NORTHERN GREECE	Aubergine	Solanum		melongena		NO	YES
MM 01271	TSAKONIKI	1993	Greece	GIAMOUSTARIS-AGRIC. RES. CENTRE OF NORTHERN GREECE	Aubergine	Solanum		melongena		NO	YES
MM 01272	EMI	1993	Greece	GIAMOUSTARIS-AGRIC. RES. CENTRE OF NORTHERN GREECE	Aubergine	Solanum		melongena		NO	YES
MM 01273	Nameless	1993	Spain	INRAE	Aubergine	Solanum	LEPTOSTEMONUM	LIDII SUNDING	Wild	NO	NO
MM 01274	Nameless	1993	Spain	INRAE	Aubergine	Solanum	LEPTOSTEMONUM	VESPERTILIO AIT.	Wild	NO	YES
MM 01275	NKOMA-MBALE	1993	Uganda	BUKENYA-MAKERERE UNIV.	Aubergine	Solanum	LEPTOSTEMONUM	WRIGHTII BENTH.	Wild	NO	NO
MM 01276	INDES 1	1993	India	GINOUX-A.S.L.	Aubergine	Solanum		melongena		NO	YES
MM 01277	INDES 2	1993	India	GINOUX-A.S.L.	Aubergine	Solanum		melongena		NO	YES
MM 01278	INDES 3	1993	India	GINOUX-A.S.L.	Aubergine	Solanum		melongena		NO	YES
MM 01279	INDES 4	1993	India	GINOUX-A.S.L.	Aubergine	Solanum		melongena		NO	NO
MM 01280	PAKLONG TALAD	1993	Thailand	EAST-WEST SEED CO	Aubergine	Solanum		melongena		NO	YES
MM 01281	PINGPONG	1993	Thailand	EAST-WEST SEED CO	Aubergine	Solanum		melongena		NO	NO
MM 01281 A	PING PONG	1993	Thailand	EAST-WEST SEED CO	Aubergine	Solanum		melongena		NO	NO
MM 01281 B	PING PONG	1993	Thailand	EAST-WEST SEED CO	Aubergine	Solanum		melongena		NO	NO
MM 01281 C	PING PONG	1993	Thailand	EAST-WEST SEED CO	Aubergine	Solanum		melongena		NO	NO
MM 01281 D	PING PONG	1993	Thailand	EAST-WEST SEED CO	Aubergine	Solanum		melongena		NO	YES
MM 01282	1283 (F1)	1993	Thailand	EAST-WEST SEED CO	Aubergine	Solanum		melongena		NO	YES
MM 01282 bis	1283 (2)	1993	Thailand	EAST-WEST SEED CO	Aubergine	Solanum		melongena		NO	YES
MM 01283	UBON KHANG KOP	1993	Thailand	EAST-WEST SEED CO	Aubergine	Solanum		melongena		NO	YES
MM 01284	TRUE EGG	1993	Thailand	EAST-WEST SEED CO	Aubergine	Solanum		melongena		NO	YES
MM 01285	NAM	1993	Thailand	EAST-WEST SEED CO	Aubergine	Solanum		melongena		NO	YES
MM 01286	TURBO	1993	Thailand	EAST-WEST SEED CO	Aubergine	Solanum		melongena		NO	NO
MM 01288	BALETE	1993	Philippines	EAST-WEST SEED CO	Aubergine	Solanum		melongena		NO	YES
MM 01289	INBRED SEL. 2	1993	Philippines	EAST-WEST SEED CO	Aubergine	Solanum		melongena		NO	YES
MM 01290	BATANGAS 2	1993	Philippines	EAST-WEST SEED CO	Aubergine	Solanum		melongena		NO	YES
MM 01291	PHILCITE	1993	Philippines	EAST-WEST SEED CO	Aubergine	Solanum		melongena		NO	YES
MM 01292	INBRED SEL. 1	1993	Philippines	EAST-WEST SEED CO	Aubergine	Solanum		melongena		NO	YES
MM 01293	MUSTANG	1993	Indonesia	EAST-WEST SEED CO	Aubergine	Solanum		melongena		NO	YES
MM 01294	TERONG PAN JANG 275	1993	Indonesia	EAST-WEST SEED CO	Aubergine	Solanum		melongena		NO	YES
MM 01295	ANONYME	1993	UNKNOWN	EAST-WEST SEED CO	Aubergine	Solanum		melongena		NO	NO
MM 01298	PARO LOCAL	1993	Bhutan	EAST-WEST SEED CO	Aubergine	Solanum		melongena		NO	YES
MM 01299	SM 164	1993	Sri Lanka	EAST-WEST SEED CO	Aubergine	Solanum		melongena		NO	YES
MM 01300	TINNEVELY	1993	Sri Lanka	EAST-WEST SEED CO	Aubergine	Solanum		melongena		NO	YES
MM 01301	Nameless	1993	Thailand	EAST-WEST SEED CO	Aubergine	Solanum	LEPTOSTEMONUM	MELONGENA L. (GROUPE G)		NO	YES
MM 01302	Nameless	1993	Thailand	EAST-WEST SEED CO	Aubergine	Solanum	LEPTOSTEMONUM	MELONGENA L. (GROUPE H)		NO	NO
MM 01303	Nameless	1993	Thailand	EAST-WEST SEED CO	Aubergine	Solanum	LEPTOSTEMONUM	MELONGENA L. (GROUPE H)		NO	NO
MM 01304	MAKHEUA PHUANG	1993	Thailand	EAST-WEST SEED CO	Aubergine			A DETERMINER		NO	NO
MM 01305	MAKHEUA PHUANG	1993	Thailand	EAST-WEST SEED CO	Aubergine	Solanum	LEPTOSTEMONUM	TORVUM SW.	Wild	NO	NO
MM 01306	MAKWAENG	1993	Thailand	EAST-WEST SEED CO	Aubergine	Solanum	LEPTOSTEMONUM	KURZII BRACE & PRAIN	Wild	NO	NO
MM 01307	MAUEK	1993	Thailand	EAST-WEST SEED CO	Aubergine	Solanum	LEPTOSTEMONUM	LASIOCARPUM DUNAL (?)	Wild	NO	NO
MM 01308	Nameless	1993	Nigeria	PETOSEED	Aubergine	Solanum	LEPTOSTEMONUM	AETHIOPICUM L. GR. GILO		NO	YES
MM 01309	Nameless	1993	United States of America	INRAE	Aubergine	Solanum	ARCHAESOLANUM	LACINIATUM AIT.	Wild	NO	NO
MM 01310	Nameless	1993	United States of America	INRAE	Aubergine	Solanum	LEPTOSTEMONUM	ELAEAGNIFOLIUM CAV.	Wild	NO	NO
MM 01311	WAD MEDANI	1993	Sudan	INRAE	Aubergine	Solanum	LEPTOSTEMONUM	COAGULANS FORSSK.	Wild	NO	NO
MM 01312	MASEI MARO NAROK	1994	Kenya	INRAE	Aubergine	Solanum	LEPTOSTEMONUM	DENNEKENSE DAMMER	Wild	NO	NO
MM 01315	NAVAICHA-NAROK	1994	Kenya	INRAE	Aubergine	Solanum	LEPTOSTEMONUM	INCANUM L. (GROUPE A)	Wild	NO	YES
MM 01316	NAVAICHA	1994	Kenya	INRAE	Aubergine	Solanum	LEPTOSTEMONUM	INCANUM L. (GROUPE A)	Wild	NO	NO
MM 01317	LAC NAKURU SOUS-BOIS	1994	Kenya	INRAE	Aubergine	Solanum	LEPTOSTEMONUM	INCANUM L. (GROUPE A)	Wild	NO	NO
MM 01318	NAVAICHA	1994	Kenya	INRAE	Aubergine	Solanum	LEPTOSTEMONUM	INCANUM L. (GROUPE A)	Wild	NO	NO
MM 01319	NAVAICHA-NAROK	1994	Kenya	INRAE	Aubergine	Solanum	LEPTOSTEMONUM	INCANUM L. (GROUPE A)	Wild	NO	NO
MM 01321	Nameless	1994	UNKNOWN	JOIGNY-S.E.I.T.A., INST. DU TABAC	Aubergine	Physalis		EDULIS		NO	NO
MM 01322	Nameless	1994	UNKNOWN	JOIGNY-S.E.I.T.A., INST. DU TABAC	Aubergine	Physalis		FLORIDANA		NO	NO
MM 01323	Nameless	1994	UNKNOWN	JOIGNY-S.E.I.T.A., INST. DU TABAC	Aubergine	Physalis		IXOCARPA		NO	NO
MM 01324	Nameless	1994	UNKNOWN	JOIGNY-S.E.I.T.A., INST. DU TABAC	Aubergine	Physalis		PHILADELPHICA		NO	NO
MM 01325	Nameless	1994	UNKNOWN	JOIGNY-S.E.I.T.A., INST. DU TABAC	Aubergine	Physalis		PUBESCENS		NO	NO
MM 01326	HIGHLANDS	1994	Thailand	EAST-WEST SEED CO	Aubergine	Solanum	MINON	ERIANTHUM D.DON	Wild	NO	NO
MM 01327	D'ARCY	1994	UNKNOWN	D'ARCY-MISSOURI BOT. GARDEN	Aubergine	Solanum	LEPTOSTEMONUM	MAHORIENSIS D'ARCY & RAKOTOZAFY	Wild	NO	NO
MM 01331	G. SCHATZ 3.31.92	1994	Madagascar	D'ARCY-MISSOURI BOT. GARDEN	Aubergine	Solanum	LEPTOSTEMONUM	MYOXOTRICHUM BAKER	Wild	NO	NO
MM 01335	Ronde de Gênes 1	1994	Italy	HENNART-VILMORIN	Aubergine	Solanum		melongena		NO	YES
MM 01336	LOCALE ADANA	1994	Turkey	VILMORIN SEMENCES	Aubergine	Solanum		melongena	Traditional cultivar	NO	YES
MM 01337	YEREVANIAN	1994	UNKNOWN	HENNART-VILMORIN	Aubergine	Solanum		melongena		NO	YES
MM 01339	RONDE DE GENES 2	1994	Italy	HENNART-VILMORIN	Aubergine	Solanum		melongena		NO	YES
MM 01340	VIOLETTA PALERMITANA	1994	Italy	HENNART-VILMORIN	Aubergine	Solanum		melongena		NO	YES
MM 01341	Nameless	1994	Chad	INRAE	Aubergine	Solanum	LEPTOSTEMONUM	COAGULANS FORSSK.	Wild	NO	NO
MM 01342	Nameless	1994	Chad	INRAE	Aubergine	Solanum	LEPTOSTEMONUM	COAGULANS FORSSK.	Wild	NO	NO
MM 01345	BIRM/S.1924	1994	Australia	LESTER-BIRMINGHAM UNIV.	Aubergine	Solanum	LEPTOSTEMONUM	CLARKIAE SYMON	Wild	NO	NO
MM 01346	BIRM/S.1925	1994	Australia	LESTER-BIRMINGHAM UNIV.	Aubergine	Solanum	LEPTOSTEMONUM	CLARKIAE SYMON	Wild	NO	NO
MM 01348	BIRM/S.1438	1994	Australia	LESTER-BIRMINGHAM UNIV.	Aubergine	Solanum	LEPTOSTEMONUM	DIOICUM AGG. W.V. FITZG.	Wild	NO	NO
MM 01349	BIRM/S.2007	1994	Yemen	LESTER-BIRMINGHAM UNIV.	Aubergine	Solanum	LEPTOSTEMONUM	HASTIFOLIUM HOCHST.	Wild	NO	NO
MM 01349 BIS	BIRM/S.2007	1994	Yemen	LESTER-BIRMINGHAM UNIV.	Aubergine	Solanum	LEPTOSTEMONUM	HASTIFOLIUM HOCHST.	Wild	NO	YES
MM 01350	BIRM/S.1933	1994	Australia	LESTER-BIRMINGHAM UNIV.	Aubergine	Solanum	LEPTOSTEMONUM	MELANOSPERMUM F. J. MUELL.	Wild	NO	NO
MM 01353	BIRM/S.1934	1994	Australia	LESTER-BIRMINGHAM UNIV.	Aubergine	Solanum	LEPTOSTEMONUM	PHLOMOIDES A. CUNN. EX BENTH.	Wild	NO	NO
MM 01354	BIRM/S.1935	1994	Australia	LESTER-BIRMINGHAM UNIV.	Aubergine	Solanum	LEPTOSTEMONUM	PHLOMOIDES A. CUNN. EX BENTH.	Wild	NO	NO
MM 01357	BIRM/S.2291 (RADIE CAR DUPLICATA DE S.2292)	1994	Australia	LESTER-BIRMINGHAM UNIV.	Aubergine	Solanum	LEPTOSTEMONUM	TUDUNUNGGAE SYMON	Wild	NO	NO
MM 01358	Nameless	1994	UNKNOWN	PERON-E.N.I.T.H.P.	Aubergine	Physalis		PERUVIANA		NO	NO
MM 01359	JARDIN LAS PALMAS	1994	Spain	INRAE	Aubergine	Datura		metel		NO	NO
MM 01360	Nameless	1994	Nepal	INRAE	Aubergine	Solanum	LEPTOSTEMONUM	VIARUM DUNAL	Wild	NO	NO
MM 01361	MILLER 4511	1994	Madagascar	D'ARCY-MISSOURI BOT. GARDEN	Aubergine	Solanum	LEPTOSTEMONUM	HEINIANUM D'ARCY & KEATING	Wild	NO	NO
MM 01363	-944750073	1994	Costa Rica	C.A.T.I.E.	Aubergine	Solanum		melongena		NO	YES
MM 01364	(944750074) MOLDOVA	1994	Costa Rica	C.A.T.I.E.	Aubergine	Solanum		melongena		NO	YES
MM 01365	-944750075	1994	Guatemala	C.A.T.I.E.	Aubergine	Solanum		melongena		NO	YES
MM 01366	MIAS	1994	UNKNOWN	MIAS-PROTECTION DES VEGETAUX	Aubergine	Solanum	LEPTOSTEMONUM	MELONGENA L. (GROUPE G)		NO	NO
MM 01367	RURRENABAQUE	1994	Bolivia (Plurinational State of)	INRAE	Aubergine	Solanum	LEPTOSTEMONUM	HISPIDUM PER	Wild	NO	NO
MM 01369	SNAKE FARM ARUSHA	1994	United Republic of Tanzania	GEBRE SELASSIE-INRAE	Aubergine	Solanum	LEPTOSTEMONUM	ARUNDO MATTEI	Wild	NO	NO
MM 01370	SNAKE FARM ARUSHA	1994	United Republic of Tanzania	GEBRE SELASSIE-INRAE	Aubergine	Solanum	LEPTOSTEMONUM	INCANUM L. (GROUPE A)	Wild	NO	NO
MM 01371	MOROGORO	1994	United Republic of Tanzania	GEBRE SELASSIE-INRAE	Aubergine	Solanum	LEPTOSTEMONUM	AETHIOPICUM L. GR. GILO		NO	NO
MM 01372	TENGERU-ARUSHA	1994	United Republic of Tanzania	GEBRE SELASSIE-INRAE	Aubergine	Solanum	LEPTOSTEMONUM	AETHIOPICUM L. GR. GILO		NO	NO
MM 01375	Nameless	1994	Australia	GEVES	Aubergine	Solanum	POTATOE	MURICATUM AIT.	Wild	NO	NO
MM 01376	COORONG	1994	Australia	INRAE	Aubergine	Solanum	LEPTOSTEMONUM	LINNAEANUM HEPPER & JAEGER	Wild	NO	NO
MM 01377	Nameless	1994	United States of America	MC GOVERN-UNIV. OF FLORIDA	Aubergine	Solanum	LEPTOSTEMONUM	VIARUM DUNAL	Wild	NO	NO
MM 01378	Nameless	1994	Belgium	INRAE	Aubergine	Lycium		LYCIUM BARBARUM L.		NO	NO
MM 01379	Nameless	1994	Australia	GEVES	Aubergine	CYPHOMANDRA		sp.		NO	NO
MM 01381	RED EGGPLANT	1995	UNKNOWN	PETOSEED	Aubergine	Solanum	LEPTOSTEMONUM	AETHIOPICUM L. GR. GILO		NO	NO
MM 01383	Nameless	1995	Mexico	INRAE	Aubergine			A DETERMINER		NO	NO
MM 01384	Nameless	1995	Yemen	INRAE	Aubergine	Solanum	LEPTOSTEMONUM	INCANUM L. (GROUPE C)	Wild	NO	NO
MM 01386	Nameless	1995	Yemen	INRAE	Aubergine	Solanum	LEPTOSTEMONUM	ANGUIVI AGG.	Wild	NO	NO
MM 01387	Nameless	1995	Yemen	INRAE	Aubergine	Solanum	LEPTOSTEMONUM	SEPICULA DUNAL	Wild	NO	YES
MM 01388	WESLACO	1995	United States of America	INRAE	Aubergine	Solanum	LEPTOSTEMONUM	MAHORIENSIS D'ARCY & RAKOTOZAFY	Wild	NO	NO
MM 01389	DAMAZIN	1995	Sudan	INRAE	Aubergine	Solanum	LEPTOSTEMONUM	CERASIFERUM DUNAL	Wild	NO	NO
MM 01390	DAMAZIN	1995	Sudan	INRAE	Aubergine	Solanum	LEPTOSTEMONUM	CERASIFERUM DUNAL	Wild	NO	NO
MM 01391	SINGA	1995	Sudan	INRAE	Aubergine	Solanum	LEPTOSTEMONUM	INCANUM L. (GROUPE C)	Wild	NO	NO
MM 01392	AUBERGINE LOCALE DAMAZIN	1994	Sudan	INRAE	Aubergine	Solanum		melongena		NO	YES
MM 01393	Nameless	1995	Sudan	INRAE	Aubergine	Solanum	LEPTOSTEMONUM	COAGULANS FORSSK.	Wild	NO	NO
MM 01394	FAU	1995	Sudan	INRAE	Aubergine	Datura		ferox		NO	NO
MM 01395	KARDITSA	1996	Greece	GUEMAS-DO-ELANCO	Aubergine	Solanum	LEPTOSTEMONUM	ELAEAGNIFOLIUM CAV.	Wild	NO	NO
MM 01403	RAVAYA	1995	France	TECHNISEM	Aubergine	Solanum		melongena	Traditional cultivar	NO	YES
MM 01405	GEZIRA	1996	Sudan	INRAE	Aubergine	Solanum	LEPTOSTEMONUM	COAGULANS FORSSK.	Wild	NO	NO
MM 01406	HORTON PLAINS	1996	Sri Lanka	PETOSEED	Aubergine	Solanum	LEPTOSTEMONUM	VIOLACEUM AGG. (?) SP	Wild	NO	NO
MM 01407	RATNAPURA	1996	Sri Lanka	PETOSEED	Aubergine	Solanum	LEPTOSTEMONUM	MELONGENA L. (GROUPE F)	Wild	NO	NO
MM 01408	KOOLAN ISLAND	1996	Australia	AQIS- MINIST. OF AGR.- DARWIN	Aubergine	Solanum	LEPTOSTEMONUM	DIOICUM AGG. W.V. FITZG.	Wild	NO	NO
MM 01409	WESTERN AUSTRALIA	1996	Australia	AQIS- MINIST. OF AGR.- DARWIN	Aubergine	Solanum	LEPTOSTEMONUM	ESURIALE LINDL.	Wild	NO	NO
MM 01410	Nameless	1996	UNKNOWN	GEBRE SELASSIE-INRAE	Aubergine	Datura		stramonium		NO	NO
MM 01411	Nameless	1996	Kenya	GUEMAS-DO-ELANCO	Aubergine	Solanum	LEPTOSTEMONUM	INCANUM L. (GROUPE A/B)	Wild	NO	NO
MM 01411 BIS	Nameless	1996	Kenya	GUEMAS-DO-ELANCO	Aubergine	Solanum	LEPTOSTEMONUM	INCANUM L. (GROUPE A/B)	Wild	NO	NO
MM 01411 TER	Nameless	1996	Kenya	GUEMAS-DO-ELANCO	Aubergine	Solanum	LEPTOSTEMONUM	INCANUM L. (GROUPE A)	Wild	NO	NO
MM 01412	Nameless	1996	Kenya	GUEMAS-DO-ELANCO	Aubergine	Solanum	LEPTOSTEMONUM	INCANUM L. (GROUPE A)	Wild	NO	NO
MM 01413	Nameless	1996	Kenya	GUEMAS-DO-ELANCO	Aubergine	Solanum	LEPTOSTEMONUM	INCANUM L. (GROUPE A?)	Wild	NO	NO
MM 01414	Nameless	1996	Kenya	GUEMAS-DO-ELANCO	Aubergine	Solanum	LEPTOSTEMONUM	INCANUM L. (GROUPE B)	Wild	NO	NO
MM 01418	Nameless	1996	Kenya	GUEMAS-DO-ELANCO	Aubergine	Solanum	LEPTOSTEMONUM	ANGUIVI AGG.	Wild	NO	NO
MM 01420	ARUSHA 1	1996	United Republic of Tanzania	INRAE	Aubergine	Solanum	LEPTOSTEMONUM	INCANUM L. (GROUPE A)	Wild	NO	NO
MM 01421	ARUSHA 1 BIS	1996	United Republic of Tanzania	INRAE	Aubergine	Solanum	LEPTOSTEMONUM	INCANUM L. (GROUPE A)	Wild	NO	NO
MM 01421 BIS	ARUSHA 1 BIS	1996	United Republic of Tanzania	INRAE	Aubergine	Solanum	LEPTOSTEMONUM	INCANUM L. (GROUPE A)	Wild	NO	NO
MM 01422	ARUSHA 2	1996	United Republic of Tanzania	INRAE	Aubergine	Solanum	LEPTOSTEMONUM	INCANUM L. (GROUPE A?)	Wild	NO	NO
MM 01423	ARUSHA 3	1996	United Republic of Tanzania	INRAE	Aubergine	Solanum	LEPTOSTEMONUM	INCANUM L. (GROUPE A)	Wild	NO	NO
MM 01424	Nameless	1996	United Republic of Tanzania	INRAE	Aubergine	Solanum	LEPTOSTEMONUM	INCANUM L. (GROUPE A)	Wild	NO	NO
MM 01425	NGORONGORO LODGE	1996	United Republic of Tanzania	INRAE	Aubergine	Solanum	LEPTOSTEMONUM	ACULEASTRUM DUNAL	Wild	NO	NO
MM 01426	OLDUVAI	1996	United Republic of Tanzania	INRAE	Aubergine	Solanum	LEPTOSTEMONUM	INCANUM L. (GROUPE B)	Wild	NO	YES
MM 01427	ARUSHA LODGE	1996	United Republic of Tanzania	INRAE	Aubergine	Solanum	LEPTOSTEMONUM	INCANUM L. (GROUPE A)	Wild	NO	NO
MM 01428	MONBASA VILLE	1996	United Republic of Tanzania	INRAE	Aubergine	Solanum	LEPTOSTEMONUM	INCANUM L. (GROUPE B)	Wild	NO	YES
MM 01429	MALINDI	1996	United Republic of Tanzania	INRAE	Aubergine	Solanum	LEPTOSTEMONUM	INCANUM L. (GROUPE B)	Wild	NO	NO
MM 01430	HYPPO POOL SAREGENTI	1996	United Republic of Tanzania	INRAE	Aubergine	Solanum	LEPTOSTEMONUM	INCANUM L. (GROUPE B)	Wild	NO	NO
MM 01431	ARUSHA LAC	1996	United Republic of Tanzania	INRAE	Aubergine	Solanum	LEPTOSTEMONUM	INCANUM L. (GROUPE A/B)	Wild	NO	NO
MM 01434	NGORONGORO WILDLIFE LODGE	1996	United Republic of Tanzania	INRAE	Aubergine	Solanum	LEPTOSTEMONUM	ACULEASTRUM DUNAL	Wild	NO	NO
MM 01436	AFRICAN EGGPLANT	1996	United Republic of Tanzania	NONO WONDIM-AVRDC	Aubergine		LEPTOSTEMONUM	A DETERMINER		NO	NO
MM 01437	AFRICAN EGGPLANT	1996	Uganda	NONO WONDIM-AVRDC	Aubergine	Solanum	LEPTOSTEMONUM	AETHIOPICUM L. GR. GILO		NO	NO
MM 01438	MATANDA 4	1996	United Republic of Tanzania	NONO WONDIM-AVRDC	Aubergine	Solanum	LEPTOSTEMONUM	AETHIOPICUM L. GR. GILO		NO	NO
MM 01439	MATANDA 5	1996	United Republic of Tanzania	NONO WONDIM-AVRDC	Aubergine	Solanum	LEPTOSTEMONUM	AETHIOPICUM L. GR. GILO		NO	NO
MM 01440	STRIPPED	1996	United Republic of Tanzania	NONO WONDIM-AVRDC	Aubergine		LEPTOSTEMONUM	A DETERMINER		NO	NO
MM 01441	UNSTRIPPED	1996	United Republic of Tanzania	NONO WONDIM-AVRDC	Aubergine		LEPTOSTEMONUM	A DETERMINER		NO	NO
MM 01442	WHITE	1996	United Republic of Tanzania	NONO WONDIM-AVRDC	Aubergine	Solanum	LEPTOSTEMONUM	AETHIOPICUM L. GR. GILO		NO	NO
MM 01443	BLACK BEAUTY	1996	Australia	FOTHERGILL'S VIA AGRI-OBTENTION	Aubergine	Solanum		melongena	Advanced or improved cultivar	NO	YES
MM 01444	BORROLOOLOO	1996	Australia	SYMON-BOT. GARDEN	Aubergine	Solanum	LEPTOSTEMONUM	MELANOSPERMUM F. J. MUELL.	Wild	NO	NO
MM 01445	AJAY-216	1996	India	ANKUR SEEDS VIA AGRI-OBTENTION	Aubergine	Solanum		melongena		NO	NO
MM 01445 [A]	AJAY 216 (F1) [A]	1996	India	ANKUR SEEDS VIA AGRI-OBTENTION	Aubergine	Solanum		melongena	Advanced or improved cultivar	NO	YES
MM 01445 [B]	AJAY-216	1996	India	ANKUR SEEDS VIA AGRI-OBTENTION	Aubergine	Solanum		melongena		NO	NO
MM 01445 [C]	AJAY-216	1996	India	ANKUR SEEDS VIA AGRI-OBTENTION	Aubergine	Solanum		melongena		NO	YES
MM 01445 [D]	AJAY-216	1996	India	ANKUR SEEDS VIA AGRI-OBTENTION	Aubergine	Solanum		melongena	Advanced or improved cultivar	NO	YES
MM 01445 [E]	AJAY-216	1996	India	ANKUR SEEDS VIA AGRI-OBTENTION	Aubergine	Solanum		melongena		NO	YES
MM 01445 [F]	AJAY-216	1996	India	ANKUR SEEDS VIA AGRI-OBTENTION	Aubergine	Solanum		melongena		NO	NO
MM 01445 [G]	AJAY 216 (F1) [G]	1996	India	ANKUR SEEDS VIA AGRI-OBTENTION	Aubergine	Solanum		melongena	Advanced or improved cultivar	NO	YES
MM 01445 [H]	AJAY-216	1996	India	ANKUR SEEDS VIA AGRI-OBTENTION	Aubergine	Solanum		melongena	Advanced or improved cultivar	NO	YES
MM 01445 [I]	AJAY-216	1996	India	ANKUR SEEDS VIA AGRI-OBTENTION	Aubergine	Solanum		melongena	Advanced or improved cultivar	NO	YES
MM 01445 [J]	AJAY 216 (F1) [J]	1996	India	ANKUR SEEDS VIA AGRI-OBTENTION	Aubergine	Solanum		melongena	Advanced or improved cultivar	NO	YES
MM 01445 [K]	AJAY-216	1996	India	ANKUR SEEDS VIA AGRI-OBTENTION	Aubergine	Solanum		melongena	Breeder's material	NO	YES
MM 01445 [L]	Ajay 216 (F1)	UNKNOWN	India	UNKNOWN	Aubergine	Solanum		melongena		NO	NO
MM 01446	KARAN-545	1996	India	ANKUR SEEDS VIA AGRI-OBTENTION	Aubergine	Solanum		melongena		NO	YES
MM 01447	KIRTI-555	1996	India	ANKUR SEEDS VIA AGRI-OBTENTION	Aubergine	Solanum		melongena		NO	NO
MM 01448	Kapil 553 [F1] (2)	1996	India	ANKUR SEEDS VIA AGRI-OBTENTION	Aubergine	Solanum		melongena	Advanced or improved cultivar	NO	YES
MM 01448 BIS	Kapil 553 [F1] (1)	1996	India	ANKUR SEEDS VIA AGRI-OBTENTION	Aubergine	Solanum		melongena	Advanced or improved cultivar	NO	YES
MM 01449	KUSHAL-258	1996	India	ANKUR SEEDS VIA AGRI-OBTENTION	Aubergine	Solanum		melongena	Advanced or improved cultivar	NO	YES
MM 01449 BIS	KUSHAL-258	1996	India	ANKUR SEEDS VIA AGRI-OBTENTION	Aubergine	Solanum		melongena		NO	NO
MM 01450	KAVACH-559	1996	India	ANKUR SEEDS VIA AGRI-OBTENTION	Aubergine	Solanum		melongena	Breeder's material	NO	NO
MM 01450 BIS	KAVACH-559	1996	India	ANKUR SEEDS VIA AGRI-OBTENTION	Aubergine	Solanum		melongena		NO	YES
MM 01450 TER	KAVACH-559	1999	India	ANKUR SEEDS VIA AGRI-OBTENTION	Aubergine	Solanum		melongena	Breeder's material	NO	NO
MM 01451	JARDIN DES PLANTES DE PARIS	1996	France	INRAE	Aubergine	Solanum	MINON	PSEUDOCAPSICUM L.	Wild	NO	NO
MM 01452	BIRM/S.0389	1996	Australia	LESTER-BIRMINGHAM UNIV.	Aubergine	Solanum	LEPTOSTEMONUM	CENTRALE BLACK	Wild	NO	NO
MM 01453	Nameless	1996	UNKNOWN	GUERARD-SOC. BOT. DU VAUCLUSE	Aubergine	Datura		metel		NO	NO
MM 01456	AUBERGINE PRIMITIVE RONDE VERTE	1997	Thailand	INRAE	Aubergine	Solanum	LEPTOSTEMONUM	MELONGENA L. (GROUPE H)		NO	YES
MM 01457	Nameless	1997	United Republic of Tanzania	INRAE	Aubergine	Solanum	LEPTOSTEMONUM	AETHIOPICUM L. GR. GILO		NO	NO
MM 01458	Nameless	1997	United Republic of Tanzania	INRAE	Aubergine	Solanum	LEPTOSTEMONUM	AETHIOPICUM L. GR. GILO		NO	NO
MM 01459	GALAS 95	1997	France	HALLARD-HORTISEM	Aubergine	Solanum		melongena		NO	NO
MM 01460	ADJANGOULOU	1997	Gabon	BORDAT-CIRAD	Aubergine	Datura		metel (?)		NO	NO
MM 01462	Nameless	1998	Spain	UNKNOWN	Aubergine	Solanum	LEPTOSTEMONUM	LINNAEANUM HEPPER & JAEGER	Wild	NO	NO
MM 01463	MARCHE PARISIEN	1998	France	GEVES	Aubergine	Solanum	LEPTOSTEMONUM	MELONGENA L. (GROUPE G)		NO	YES
MM 01464	SANS NOM	1998	Côte d'Ivoire	INRAE	Aubergine	Solanum		melongena		NO	YES
MM 01465	Nameless	1998	Côte d'Ivoire	INRAE	Aubergine	Solanum	LEPTOSTEMONUM	AETHIOPICUM L. GR. GILO		NO	NO
MM 01466	Nameless	1998	Côte d'Ivoire	INRAE	Aubergine	Solanum	LEPTOSTEMONUM	AETHIOPICUM L. GR. GILO		NO	NO
MM 01467	Nameless	1998	Côte d'Ivoire	INRAE	Aubergine	Solanum	LEPTOSTEMONUM	MACROCARPON L.		NO	NO
MM 01468	Nameless	1998	Côte d'Ivoire	INRAE	Aubergine	Solanum	LEPTOSTEMONUM	AETHIOPICUM L. GR. KUMBA (?)		NO	NO
MM 01469	CHANG QIE	1998	China	IVF	Aubergine	Solanum		melongena		NO	YES
MM 01470	QI QIE 3	1998	China	IVF	Aubergine	Solanum		melongena		NO	YES
MM 01471	DA CHANG QIE	1998	China	IVF	Aubergine	Solanum		melongena		NO	YES
MM 01472	90-50	1998	China	IVF	Aubergine	Solanum		melongena		NO	YES
MM 01473	Nameless	1998	Congo	IVF	Aubergine	Solanum	LEPTOSTEMONUM	AETHIOPICUM L. GR. GILO		NO	NO
MM 01474	Nameless	1998	India	RAJAM-UDSC	Aubergine	Solanum	LEPTOSTEMONUM	AETHIOPICUM L. GR. ACULEATUM		NO	NO
MM 01474 BIS	Nameless	1998	India	RAJAM-UDSC	Aubergine	Solanum	LEPTOSTEMONUM	AETHIOPICUM L. GR. ACULEATUM		NO	NO
MM 01475	Nameless	1998	India	RAJAM-UDSC	Aubergine	Solanum	LEPTOSTEMONUM	SISYMBRIFOLIUM LAM.	Wild	NO	NO
MM 01476 BIS	Nameless	1998	India	RAJAM-UDSC	Aubergine	Solanum	LEPTOSTEMONUM	AETHIOPICUM L. GR. GILO OU SHUM (?)		NO	NO
MM 01477	Nameless	1998	India	RAJAM-UDSC	Aubergine	Solanum	LEPTOSTEMONUM	VIOLACEUM ORT.	Wild	NO	NO
MM 01478	Nameless	1998	India	RAJAM-UDSC	Aubergine	Solanum	LEPTOSTEMONUM	VIARUM DUNAL	Wild	NO	NO
MM 01479	Nameless	1998	India	RAJAM-UDSC	Aubergine	Solanum	LEPTOSTEMONUM	MELONGENA L. (GROUPE E? + H)	Wild	NO	NO
MM 01479 BIS	Nameless	1998	India	RAJAM-UDSC	Aubergine	Solanum	LEPTOSTEMONUM	MELONGENA L. (GROUPE E? + H)	Wild	NO	NO
MM 01479 QUA	Nameless	1998	India	RAJAM-UDSC	Aubergine	Solanum		MELONGENA L. (GROUPE H?)		NO	NO
MM 01479 TER	Nameless	1998	India	RAJAM-UDSC	Aubergine	Solanum		MELONGENA L. (GROUPE G)		NO	NO
MM 01480	Nameless	1998	UNKNOWN	ROTINO-IST. SP. PER L'ORTICOLT.	Aubergine	Solanum	LEPTOSTEMONUM	AETHIOPICUM L. GR. GILO		NO	YES
MM 01481	Nameless	1998	UNKNOWN	ROTINO-IST. SP. PER L'ORTICOLT.	Aubergine	Solanum	LEPTOSTEMONUM	TORVUM SW.	Wild	NO	NO
MM 01482	Nameless	1998	UNKNOWN	ROTINO-IST. SP. PER L'ORTICOLT.	Aubergine	Solanum	LEPTOSTEMONUM	SISYMBRIFOLIUM LAM.	Wild	NO	NO
MM 01483	Nameless	1998	UNKNOWN	ROTINO-IST. SP. PER L'ORTICOLT.	Aubergine	Solanum	LEPTOSTEMONUM	AETHIOPICUM L. GR. ACULEATUM		NO	YES
MM 01484	NICANDRO	1998	Italy	ROTINO-IST. SP. PER L'ORTICOLT.	Aubergine	Solanum		melongena		NO	YES
MM 01485	1 F5 (9)	1998	Italy	ROTINO-IST. SP. PER L'ORTICOLT.	Aubergine	Solanum		melongena		NO	YES
MM 01486	KUAIYUANQIE	1998	China	VEG. RES. INST.-TIANJIN	Aubergine	Solanum		melongena		NO	YES
MM 01487	HANGZHOU N°1	1998	China	INST. OF HORTIC.	Aubergine	Solanum		melongena		NO	YES
MM 01488	ZI XIN PRECOCE N°1	1998	China	Vegetables institute of China	Aubergine	Solanum		melongena		NO	YES
MM 01489	ZI XIN PRECOCE N°2	1998	China	Vegetables institute of China	Aubergine	Solanum		melongena		NO	YES
MM 01490	ZI XIN PRECOCE N°3	1998	China	Vegetables institute of China	Aubergine	Solanum		melongena		NO	YES
MM 01490 BIS	Nameless	1998	China	Vegetables institute of China	Aubergine	Solanum		melongena		NO	YES
MM 01491	CHONGQING PRECOCE N°1	1998	China	INST. DE RECH. SC. AGRIC.	Aubergine	Solanum		melongena		NO	YES
MM 01492	CHONGQING PRECOCE N°2	1998	China	INST. DE RECH. SC. AGRIC.	Aubergine	Solanum		melongena		NO	YES
MM 01493	NOIRE MEI ZHOU	1998	China	INRAE	Aubergine	Solanum		melongena	Traditional cultivar	NO	YES
MM 01494	15797	1998	Australia	SYMON-BOT. GARDEN	Aubergine	Solanum	LEPTOSTEMONUM	CHIPPENDALEI SYMON	Wild	NO	NO
MM 01495	15796	1998	Australia	SYMON-BOT. GARDEN	Aubergine	Solanum	LEPTOSTEMONUM	CHIPPENDALEI SYMON	Wild	NO	NO
MM 01496	15787	1998	Australia	SYMON-BOT. GARDEN	Aubergine	Solanum	LEPTOSTEMONUM	CHIPPENDALEI SYMON	Wild	NO	NO
MM 01498	F1 Ankur-brinjal	1998	India	ANKUR SEEDS	Aubergine	Solanum		melongena	Advanced or improved cultivar	NO	YES
MM 01498 BIS	ANKUR BRINJAL	1998	India	ANKUR SEEDS	Aubergine	Solanum		melongena	Advanced or improved cultivar	NO	YES
MM 01499	N░ SOL 229/90 (ORIG NB 2797) BAGRIZANI	1998	Georgia	IPK	Aubergine	Solanum	LEPTOSTEMONUM	AETHIOPICUM L. GR. GILO		NO	NO
MM 01501	MINON	1998	France	INST. OF HORTIC. ZAAS HANGZOU	Aubergine	Solanum	MINON	PSEUDOCAPSICUM L.	Wild	NO	NO
MM 01502	Nameless	1998	Madagascar	DURANTON-TECHNISEM	Aubergine	Solanum	LEPTOSTEMONUM	AETHIOPICUM L. GR. GILO		NO	NO
MM 01503	Nameless	1998	Australia	VAN DER WEERDEN	Aubergine	Solanum	LEPTOSTEMONUM	CAMPANULATUM R. BR.	Wild	NO	YES
MM 01504	QIYE	1998	China	INRAE	Aubergine	Solanum		melongena		NO	YES
MM 01505	RONDE PRECOCE DE TIANJIN	1998	China	TIANJIN INST. OF VEGETABLES	Aubergine	Solanum		melongena		NO	YES
MM 01506	DAVANGERE	1999	India	DURANTON-TECHNISEM	Aubergine	Solanum	LEPTOSTEMONUM	MELONGENA L. (GROUPE E)	Wild	NO	YES
MM 01507	VIKAR	1998	Russian Federation	MAMEDOV-ALL RUSSIAN RES. INST. OF VEG. BREED. & SEED PROD.	Aubergine	Solanum		melongena		NO	YES
MM 01508 A	SOLJARIS (I-4)	1998	Russian Federation	MAMEDOV-ALL RUSSIAN RES. INST. OF VEG. BREED. & SEED PROD.	Aubergine	Solanum		melongena		NO	NO
MM 01508 B	SOLJARIS (II-5)	1998	Russian Federation	MAMEDOV-ALL RUSSIAN RES. INST. OF VEG. BREED. & SEED PROD.	Aubergine	Solanum		melongena		NO	NO
MM 01508 B/BIS	SOLJARIS (II-5)	1999	Russian Federation	MAMEDOV-ALL RUSSIAN RES. INST. OF VEG. BREED. & SEED PROD.	Aubergine	Solanum		melongena		NO	NO
MM 01508 C	SOLJARIS (II-8)	1998	Russian Federation	MAMEDOV-ALL RUSSIAN RES. INST. OF VEG. BREED. & SEED PROD.	Aubergine	Solanum		melongena		NO	NO
MM 01508 D	SOLJARIS (II-3)	1998	Russian Federation	MAMEDOV-ALL RUSSIAN RES. INST. OF VEG. BREED. & SEED PROD.	Aubergine	Solanum		melongena		NO	NO
MM 01520	DRYSDALE RIVER NAT. PARK	1999	Australia	AQIS- MINIST. OF AGR.- DARWIN	Aubergine	Solanum	LEPTOSTEMONUM	PETRAEUM SYMON	Wild	NO	NO
MM 01521	ERIC HUNTERS CAMP	1999	Australia	AQIS- MINIST. OF AGR.- DARWIN	Aubergine	Solanum	LEPTOSTEMONUM	CUNNINGHAMII BENTH.	Wild	NO	NO
MM 01522	Nameless	1999	UNKNOWN	GIRARD-I.R.A.T.	Aubergine	Solanum	SOLANUM	CHENOPODIOIDES	Wild	NO	NO
MM 01524	Nameless	1999	Australia	GIRARD-I.R.A.T.	Aubergine	Solanum	LEPTOSTEMONUM	PRINOPHYLLUM DUNAL	Wild	NO	NO
MM 01526	Nameless	1999	UNKNOWN	GIRARD-I.R.A.T.	Aubergine	Solanum	LEPTOSTEMONUM	ATROPURPUREUM SCHRANK	Wild	NO	NO
MM 01527	Nameless	1999	UNKNOWN	GIRARD-I.R.A.T.	Aubergine	Solanum	LEPTOSTEMONUM	AETHIOPICUM L. GR. GILO		NO	NO
MM 01529	Nameless	1999	UNKNOWN	GIRARD-I.R.A.T.	Aubergine	Solanum	LEPTOSTEMONUM	JATROPHIFOLIUM DUNAL	Wild	NO	NO
MM 01530	Nameless	1999	UNKNOWN	GIRARD-I.R.A.T.	Aubergine	Solanum	LEPTOSTEMONUM	LINNAEANUM HEPPER & JAEGER	Wild	NO	NO
MM 01532	Nameless	1999	UNKNOWN	GIRARD-I.R.A.T.	Aubergine	Solanum	LEPTOSTEMONUM	AETHIOPICUM L. GR. GILO		NO	NO
MM 01533	Nameless	1999	UNKNOWN	GIRARD-I.R.A.T.	Aubergine	Solanum	SOLANUM	OPACUM A. BRAUN & BOUCHE(NIGRUM AFF)	Wild	NO	NO
MM 01534	Nameless	1999	Senegal	INRAE	Aubergine	Solanum	LEPTOSTEMONUM	ELAEAGNIFOLIUM CAV. (?)	Wild	NO	YES
MM 01535	Nameless	1999	France	GEBRE SELASSIE-INRAE	Aubergine	Datura		ferox		NO	NO
MM 01536	TELUUNJUK/S00014/X400	1999	Malaysia	A.V.R.D.C. Taiwan	Aubergine	Solanum		melongena		NO	NO
MM 01538	KARW TANG KAOW/S00167/X403	1999	Thailand	A.V.R.D.C. Taiwan	Aubergine	Solanum		MELONGENA L. (GROUPE F OU G ?)	Wild	NO	NO
MM 01539	S00168/X404	1999	Thailand	A.V.R.D.C. Taiwan	Aubergine	Solanum		melongena		NO	NO
MM 01541	S00172/X408	1999	Thailand	A.V.R.D.C. Taiwan	Aubergine	Solanum		melongena		NO	NO
MM 01542	S00174/X410	1999	Thailand	A.V.R.D.C. Taiwan	Aubergine	Solanum		MELONGENA (GROUPE F)	Wild	NO	NO
MM 01543	TS3/X412	1999	Malaysia	A.V.R.D.C. Taiwan	Aubergine	Solanum		melongena		NO	NO
MM 01545	PERAT/TS11/X415	1999	Malaysia	A.V.R.D.C. Taiwan	Aubergine	Solanum		MELONGENA L. (GROUPE F)	Wild	NO	NO
MM 01547	BULAT KEUL/TS15/X418	1999	Malaysia	A.V.R.D.C. Taiwan	Aubergine	Solanum		melongena		NO	YES
MM 01548	RAPUN/TS17/X420	1999	Malaysia	A.V.R.D.C. Taiwan	Aubergine	Solanum		MELONGENA L. (GROUPE G)		NO	YES
MM 01549	KAPAL/TS18/X421	1999	Malaysia	A.V.R.D.C. Taiwan	Aubergine	Solanum	LEPTOSTEMONUM	CAPSICOIDES ALL.	Wild	NO	NO
MM 01551	TS33/X429	1999	Malaysia	A.V.R.D.C. Taiwan	Aubergine	Solanum		melongena		NO	YES
MM 01553	TS47/X441	1999	Malaysia	A.V.R.D.C. Taiwan	Aubergine	Solanum		melongena		NO	YES
MM 01554	TS49/X442	1999	Malaysia	A.V.R.D.C. Taiwan	Aubergine	Solanum		melongena		NO	YES
MM 01555	UPLB/TS50/X443	1999	Malaysia	A.V.R.D.C. Taiwan	Aubergine	Solanum		melongena		NO	YES
MM 01557	TS52/X445	1999	Malaysia	A.V.R.D.C. Taiwan	Aubergine	Solanum	LEPTOSTEMONUM	MACROCARPON L.		NO	YES
MM 01558	TS54/X447	1999	Malaysia	A.V.R.D.C. Taiwan	Aubergine	Solanum	LEPTOSTEMONUM	MACROCARPON L.		NO	NO
MM 01559	BULAT UNGU/TS57/X451	1999	Indonesia	A.V.R.D.C. Taiwan	Aubergine	Solanum		melongena		NO	YES
MM 01560	KOPEK PUTIH/TS58/X452	1999	Indonesia	A.V.R.D.C. Taiwan	Aubergine	Solanum		melongena		NO	YES
MM 01561	TERONG PUTIH/TS59/X453	1999	Indonesia	A.V.R.D.C. Taiwan	Aubergine	Solanum		melongena		NO	YES
MM 01562	PALE GREEN/TS60A/X454	1999	Indonesia	A.V.R.D.C. Taiwan	Aubergine	Solanum		melongena		NO	NO
MM 01563	PALE GREEN/TS60B/X455	1999	Indonesia	A.V.R.D.C. Taiwan	Aubergine	Solanum		melongena		NO	YES
MM 01564	HIJAU/TS61/X456	1999	Indonesia	A.V.R.D.C. Taiwan	Aubergine	Solanum		melongena		NO	YES
MM 01565	TS62/X457	1999	Indonesia	A.V.R.D.C. Taiwan	Aubergine	Solanum		MELONGENA L. (GROUPE G)		NO	YES
MM 01566	JACKPOT/TS64/X459	1999	Netherlands	A.V.R.D.C. Taiwan	Aubergine	Solanum		melongena		NO	YES
MM 01567	MARUKAN/TS66/X461	1999	Indonesia	A.V.R.D.C. Taiwan	Aubergine	Solanum		melongena		NO	YES
MM 01568	TS67/X462	1999	Indonesia	A.V.R.D.C. Taiwan	Aubergine	Solanum		melongena		NO	YES
MM 01569	HIJAU BESAR/TS68/X463	1999	Indonesia	A.V.R.D.C. Taiwan	Aubergine	Solanum		melongena		NO	YES
MM 01570	TS74/X466	1999	Thailand	A.V.R.D.C. Taiwan	Aubergine	Solanum		melongena		NO	YES
MM 01571	TS76/X468	1999	Thailand	A.V.R.D.C. Taiwan	Aubergine	Solanum		MELONGENA L. (GROUPE G)		NO	NO
MM 01572	TS77/X469	1999	Thailand	A.V.R.D.C. Taiwan	Aubergine	Solanum		melongena		NO	YES
MM 01573	TS79/X471	1999	Thailand	A.V.R.D.C. Taiwan	Aubergine	Solanum		melongena		NO	YES
MM 01573 bis	TS79/X471	1999	Thailand	A.V.R.D.C. Taiwan	Aubergine	Solanum		melongena		NO	YES
MM 01574	TS81/X473	1999	Thailand	A.V.R.D.C. Taiwan	Aubergine	Solanum		melongena		NO	YES
MM 01574 bis	TS81/X473	1999	Thailand	A.V.R.D.C. Taiwan	Aubergine	Solanum		melongena		NO	YES
MM 01575	TS82/X474	1999	Thailand	A.V.R.D.C. Taiwan	Aubergine	Solanum		melongena		NO	YES
MM 01576	GLATIK/TS87/X479	1999	Indonesia	A.V.R.D.C. Taiwan	Aubergine	Solanum		MELONGENA L. (GROUPE G ?)		NO	YES
MM 01577	TS89A/X481	1999	Indonesia	A.V.R.D.C. Taiwan	Aubergine	Solanum		melongena		NO	YES
MM 01578	TS 89B/X 482	1999	Indonesia	A.V.R.D.C. Taiwan	Aubergine	Solanum	LEPTOSTEMONUM	MELONGENA L. (GROUPE G/H)		NO	NO
MM 01579	KOPEK/TS93/X486	1999	Indonesia	A.V.R.D.C. Taiwan	Aubergine	Solanum		melongena		NO	YES
MM 01580	KOPEK/TS97/X490	1999	Indonesia	A.V.R.D.C. Taiwan	Aubergine	Solanum		melongena		NO	NO
MM 01581	FARMER LONG/TS99/X492	1999	Indonesia	A.V.R.D.C. Taiwan	Aubergine	Solanum		MELONGENA L. (GROUPE G)		NO	YES
MM 01582	TERUNG KECIL LOCAL/TS102/X495	1999	Malaysia	A.V.R.D.C. Taiwan	Aubergine	Solanum		MELONGENA L. (GROUPE G)		NO	NO
MM 01583	TS105/X499	1999	Philippines	A.V.R.D.C. Taiwan	Aubergine	Solanum		melongena		NO	YES
MM 01584	TS108/X502	1999	Philippines	A.V.R.D.C. Taiwan	Aubergine	Solanum		melongena		NO	NO
MM 01585	TS111/X505	1999	Philippines	A.V.R.D.C. Taiwan	Aubergine	Solanum		melongena		NO	YES
MM 01586	TS115/X509	1999	Philippines	A.V.R.D.C. Taiwan	Aubergine	Solanum		melongena		NO	YES
MM 01587	TS119/X513	1999	Philippines	A.V.R.D.C. Taiwan	Aubergine	Solanum		melongena		NO	YES
MM 01588	TS122/X516	1999	Philippines	A.V.R.D.C. Taiwan	Aubergine	Solanum		melongena		NO	YES
MM 01589	TS125/X519	1999	Philippines	A.V.R.D.C. Taiwan	Aubergine	Solanum		melongena		NO	YES
MM 01590	TS207/X521	1999	Malaysia	A.V.R.D.C. Taiwan	Aubergine	Solanum	MINON	PSEUDOCAPSICUM L.	Wild	NO	NO
MM 01592	GOPAL NAGAR (BANGALORE)	1999	India	INRAE	Aubergine	Solanum	LEPTOSTEMONUM	MELONGENA L. (GROUPE E)	Wild	NO	NO
MM 01593	P.R. CLUSTER	1999	India	INDO AMER. HYB. SEED	Aubergine	Solanum		melongena		NO	NO
MM 01594	INDAM 1632	1999	India	INDO AMER. HYB. SEED	Aubergine	Solanum		melongena		NO	NO
MM 01595	SOURABHA	1999	India	INDO AMER. HYB. SEED	Aubergine	Solanum		melongena		NO	NO
MM 01596	P.L. CLUSTER	1999	India	INDO AMER. HYB. SEED	Aubergine	Solanum		melongena		NO	NO
MM 01597	MYSORE GREEN LONG	1999	India	INDO AMER. HYB. SEED	Aubergine	Solanum		melongena		NO	NO
MM 01598	HYBRID GREEN	1999	India	INDO AMER. HYB. SEED	Aubergine	Solanum		melongena		NO	NO
MM 01598 bis	Hybrid green	1999	India	INDO AMER. HYB. SEED	Aubergine	Solanum		melongena		NO	NO
MM 01599	SUPRIYA	1999	India	INDO AMER. HYB. SEED	Aubergine	Solanum		melongena		NO	NO
MM 01600	INDAM 451	1999	India	INDO AMER. HYB. SEED	Aubergine	Solanum		melongena		NO	NO
MM 01601	Suchitra (F1)	1999	India	INDO AMER. HYB. SEED	Aubergine	Solanum		melongena		NO	NO
MM 01602	Nameless	1999	India	IND. INST. HORT. RES.	Aubergine	Solanum	LEPTOSTEMONUM	VIARUM DUNAL	Wild	NO	NO
MM 01604	PUSA HYBRID-5	1999	India	I.A.R.I.	Aubergine	Solanum		melongena		NO	NO
MM 01605	PUSA HYBRID-6	1999	India	I.A.R.I.	Aubergine	Solanum		melongena		NO	NO
MM 01607	PUSA UPKAR	1999	India	I.A.R.I.	Aubergine	Solanum		melongena		NO	NO
MM 01608	PUSA BINDU	1999	India	I.A.R.I.	Aubergine	Solanum		melongena		NO	NO
MM 01609	PUSA UTTAM	1999	India	I.A.R.I.	Aubergine	Solanum		melongena		NO	NO
MM 01610	PUSA ANKUR	1999	India	I.A.R.I.	Aubergine	Solanum		melongena		NO	NO
MM 01611	PUSA PURPLE LONG	1999	India	I.A.R.I.	Aubergine	Solanum		melongena		NO	NO
MM 01612	PUSA KRANTI	1999	India	I.A.R.I.	Aubergine	Solanum		melongena		NO	NO
MM 01613	GANDIA	1999	Spain	Private individual	Aubergine	Solanum		melongena	Traditional cultivar	NO	YES
MM 01614	CORDIA 721 VERT	1999	UNKNOWN	ESTORGUES-TROPICASEM	Aubergine		LEPTOSTEMONUM	A DETERMINER		NO	NO
MM 01615	CORDIA BLANC	1999	UNKNOWN	ESTORGUES-TROPICASEM	Aubergine	Solanum	LEPTOSTEMONUM	MACROCARPON L.		NO	NO
MM 01616	Nameless	1999	UNKNOWN	ESTORGUES-TROPICASEM	Aubergine	Solanum	LEPTOSTEMONUM	AETHIOPICUM L. GR. SHUM		NO	NO
MM 01617	AUB. NIKEMBA (YAMMOUSSOUKRO)	1999	Côte d'Ivoire	ESTORGUES-TROPICASEM	Aubergine	Solanum	LEPTOSTEMONUM	AETHIOPICUM L. GR. GILO		NO	NO
MM 01617 BIS	AUB. NIKEMBA (YAMMOUSSOUKRO)	1999	Côte d'Ivoire	ESTORGUES-TROPICASEM	Aubergine	Solanum	LEPTOSTEMONUM	AETHIOPICUM L. GR. GILO		NO	NO
MM 01617 TER	AUB. NIKEMBA (YAMMOUSSOUKRO)	1999	Côte d'Ivoire	ESTORGUES-TROPICASEM	Aubergine	Solanum	LEPTOSTEMONUM	AETHIOPICUM L. GR. GILO		NO	NO
MM 01619	NDROWA OEUF BONOVA	1999	Côte d'Ivoire	ESTORGUES-TROPICASEM	Aubergine	Solanum	LEPTOSTEMONUM	AETHIOPICUM L. GR. GILO		NO	NO
MM 01620	NDROWA OVOIDE	1999	Côte d'Ivoire	ESTORGUES-TROPICASEM	Aubergine	Solanum	LEPTOSTEMONUM	AETHIOPICUM L. GR. GILO		NO	NO
MM 01620 BIS	NDROWA OVOIDE	1999	Côte d'Ivoire	ESTORGUES-TROPICASEM	Aubergine	Solanum	LEPTOSTEMONUM	AETHIOPICUM L. GR. GILO		NO	NO
MM 01620 TER	NDROWA OVOIDE	1999	Côte d'Ivoire	ESTORGUES-TROPICASEM	Aubergine	Solanum	LEPTOSTEMONUM	AETHIOPICUM L. GR. GILO		NO	NO
MM 01621	KOTOBI (YAMMOUSSOUKRO)	1999	Côte d'Ivoire	ESTORGUES-TROPICASEM	Aubergine	Solanum	LEPTOSTEMONUM	AETHIOPICUM L. GR. GILO		NO	NO
MM 01622	AUB. DE BONOVA	1999	Côte d'Ivoire	ESTORGUES-TROPICASEM	Aubergine	Solanum	LEPTOSTEMONUM	MACROCARPON L.		NO	NO
MM 01623	NIKEMBA LONGUE (YAMMOUSSOUKRO)	1999	Côte d'Ivoire	ESTORGUES-TROPICASEM	Aubergine	Solanum	LEPTOSTEMONUM	AETHIOPICUM L. GR. GILO		NO	NO
MM 01623 BIS	NIKEMBA LONGUE (YAMMOUSSOUKRO)	1999	Côte d'Ivoire	ESTORGUES-TROPICASEM	Aubergine	Solanum	LEPTOSTEMONUM	AETHIOPICUM L. GR. GILO		NO	NO
MM 01624	NIKEMBA OVOIDE	1999	Côte d'Ivoire	ESTORGUES-TROPICASEM	Aubergine	Solanum	LEPTOSTEMONUM	AETHIOPICUM L. GR. GILO		NO	NO
MM 01625	AUB. GNANGNAN (YAMMOUSSOUKRO)	1999	Côte d'Ivoire	ESTORGUES-TROPICASEM	Aubergine	Solanum	LEPTOSTEMONUM	ANGUIVI AGG.	Wild	NO	NO
MM 01626	FRUITS BLANCS	1999	UNKNOWN	SALL-TROPICASEM	Aubergine	Solanum	LEPTOSTEMONUM	MACROCARPON L.		NO	NO
MM 01627	SOLANUM SAUVAGE (NIAYES)	1999	Senegal	DURANTON-TECHNISEM	Aubergine	Solanum	LEPTOSTEMONUM	ELAEAGNIFOLIUM CAV.	Wild	NO	NO
MM 01630	BD-1	1999	Indonesia	MARISKA-CENTRAL RES. INST. FOR INDUST. CROPS-BOGOR	Aubergine	Solanum	LEPTOSTEMONUM	TORVUM SW.	Wild	NO	NO
MM 01631	CN2	1999	Indonesia	MARISKA-CENTRAL RES. INST. FOR INDUST. CROPS-BOGOR	Aubergine	Solanum	LEPTOSTEMONUM	TORVUM SW.	Wild	NO	NO
MM 01632	TSK II	1999	Indonesia	MARISKA-CENTRAL RES. INST. FOR INDUST. CROPS-BOGOR	Aubergine	Solanum	LEPTOSTEMONUM	TORVUM SW.	Wild	NO	NO
MM 01633	SW	1999	Indonesia	MARISKA-CENTRAL RES. INST. FOR INDUST. CROPS-BOGOR	Aubergine	Solanum	LEPTOSTEMONUM	JAMAICENSE MILL.	Wild	NO	NO
MM 01634	ALKEKENGE DU PEROU (GROSEILLE DU CAP)	1999	France	INRAE	Aubergine	Physalis		sp.		NO	NO
MM 01635	SOLANUM 440	1999	UNKNOWN	ESTORGUES-TROPICASEM	Aubergine	Solanum	LEPTOSTEMONUM	AETHIOPICUM L. GR. SHUM		NO	NO
MM 01636	LONGUE NOIRE FENGCHENG	1999	China	GOULPAUT-VILMORIN	Aubergine	Solanum		melongena		NO	NO
MM 01637	DONGLING FENGCHENG	1999	China	GOULPAUT-VILMORIN	Aubergine	Solanum		melongena		NO	NO
MM 01638	LIANING FENGCHENG	1999	China	GOULPAUT-VILMORIN	Aubergine	Solanum		melongena		NO	YES
MM 01638 bis	LIANING FENGCHENG	1999	China	GOULPAUT-VILMORIN	Aubergine	Solanum		melongena		NO	YES
MM 01640	WEEDY	1999	Sudan	INRAE	Aubergine	Solanum	LEPTOSTEMONUM	COAGULANS FORSSK.	Wild	NO	NO
MM 01641	N'DROWA ISSIA	2000	Unknown	DURANTON-TECHNISEM	Aubergine	Solanum	LEPTOSTEMONUM	AETHIOPICUM L. GR. GILO		NO	NO
MM 01642	KEUR M'BIR N'DAO	2000	Unknown	DURANTON-TECHNISEM	Aubergine	Solanum	LEPTOSTEMONUM	AETHIOPICUM L. GR. KUMBA		NO	NO
MM 01643	99 47 50 035	2000	UNKNOWN	VAN DER WEERDEN	Aubergine	Solanum	LEPTOSTEMONUM	MACROCARPON L.		NO	NO
MM 01644	THAMA KOSHI NADI RIVER	1999	Nepal	INRAE	Aubergine	Solanum	LEPTOSTEMONUM	MELONGENA L. (GROUPE H)		NO	YES
MM 01647	LONG EGGPLANT 9318	2000	China	LIAN YONG-I.V.F.	Aubergine	Solanum		melongena		NO	NO
MM 01648	5 LEAVES EGGPLANT	2000	China	LIAN YONG-I.V.F.	Aubergine	Solanum		melongena		NO	NO
MM 01649	6 LEAVES EGGPLANT	2000	China	LIAN YONG-I.V.F.	Aubergine	Solanum		melongena		NO	NO
MM 01650	7 LEAVES EGGPLANT	2000	China	LIAN YONG-I.V.F.	Aubergine	Solanum		melongena		NO	NO
MM 01651	9 LEAVES EGGPLANT	2000	China	LIAN YONG-I.V.F.	Aubergine	Solanum		melongena		NO	NO
MM 01652	WON SHA V06B0886	2000	China	LIAN YONG-I.V.F.	Aubergine	Solanum		melongena		NO	NO
MM 01653	GANG N°11V06B0950	2000	China	LIAN YONG-I.V.F.	Aubergine	Solanum		melongena		NO	NO
MM 01654	TERUNG UNGU	2000	Indonesia	MARISKA-CENTRAL RES. INST. FOR INDUST. CROPS-BOGOR	Aubergine	Solanum		melongena		NO	NO
MM 01655	MOON	2000	Indonesia	TROPICA SEEDS	Aubergine	Solanum		melongena		NO	NO
MM 01656	BALI	2000	Indonesia	TROPICA SEEDS	Aubergine	Solanum		melongena	Advanced or improved cultivar	NO	YES
MM 01657	BREAD SOLANUM	2000	Indonesia	MARISKA-CENTRAL RES. INST. FOR INDUST. CROPS-BOGOR	Aubergine	Solanum	LEPTOSTEMONUM	VIARUM DUNAL	Wild	NO	NO
MM 01658	FINGER SOLANUM	2000	Indonesia	MARISKA-CENTRAL RES. INST. FOR INDUST. CROPS-BOGOR	Aubergine	Solanum		melongena		NO	NO
MM 01659	TERONG BULAT HIJAU	2000	Indonesia	INRAE	Aubergine	Solanum		melongena		NO	NO
MM 01660	TERONG XANH	2000	Indonesia	INRAE	Aubergine	Solanum		melongena		NO	NO
MM 01661	DADALI	2000	Indonesia	INRAE	Aubergine	Solanum		melongena		NO	NO
MM 01662	TERONG UNGU LONG BEAUTY	2000	Indonesia	INRAE	Aubergine	Solanum		melongena		NO	NO
MM 01663	TERONG NAGA UNGU	2000	Indonesia	INRAE	Aubergine	Solanum		melongena		NO	NO
MM 01664	TERONG NH	2000	Indonesia	INRAE	Aubergine	Solanum		melongena		NO	NO
MM 01665	MELRIMBA GARDEN, BOGOR PUN CAK	2000	Indonesia	INRAE	Aubergine	Solanum	MINON	MAURITIANUM AFF.	Wild	NO	NO
MM 01666	FORTUNA	2000	Indonesia	CAP PANAH MERAH SEEDS	Aubergine	Solanum		melongena		NO	NO
MM 01667	GELATIK	2000	Indonesia	CAP PANAH MERAH SEEDS	Aubergine	Solanum		melongena		NO	NO
MM 01670	ECHO 72	2000	Indonesia	CHIA TAI SEEDS	Aubergine	Solanum		melongena		NO	NO
MM 01671	VIRGIN	2000	Indonesia	QUALITY SEEDS	Aubergine	Solanum		melongena	Advanced or improved cultivar	NO	YES
MM 01672	RAYAN 520	2000	Syrian Arab Republic	Private individual	Aubergine	Solanum		melongena		NO	NO
MM 01673	KASSIOUN C.Y.	2000	Syrian Arab Republic	Private individual	Aubergine	Solanum		melongena		NO	NO
MM 01674	CHANG CHIEH TZU	2000	China	BORNER-IPK	Aubergine	Solanum		melongena		NO	NO
MM 01675	GELATIK (TERONG LALAB BULAT HIJAU)	2000	Indonesia	HEISER-INDIANA UNIV.	Aubergine	Solanum		melongena		NO	NO
MM 01676	PALEMBANG (C.H.9909,RATNAWATI55281)	2000	Indonesia	HEISER-INDIANA UNIV.	Aubergine	Solanum	LEPTOSTEMONUM	MELONGENA L. (GROUPE H)		NO	YES
MM 01677	MA-KHYA CHA-AM (C.H.9910,J.HUMBLES)	2000	Thailand	HEISER-INDIANA UNIV.	Aubergine	Solanum	LEPTOSTEMONUM	MELONGENA L. (GROUPE G)		NO	NO
MM 01678	KAENG KRACHAN (C.H.9912)	2000	Thailand	HEISER-INDIANA UNIV.	Aubergine	Solanum	LEPTOSTEMONUM	MELONGENA L. (GROUPE F)	Wild	NO	NO
MM 01681	Nameless	2000	Italy	HENNART-VILMORIN	Aubergine	Solanum	LEPTOSTEMONUM	LINNAEANUM HEPPER & JAEGER	Wild	NO	NO
MM 01682	Nameless	2000	France	HENNART-VILMORIN	Aubergine	Solanum	SOLANUM	VILLOSUM MILL. SUBSP. VILLOSUM	Wild	NO	NO
MM 01683	GUAYABO (TURRIALBA)	2001	Costa Rica	INRAE	Aubergine		LEPTOSTEMONUM	A DETERMINER		NO	NO
MM 01684	ZEBRINA	2000	UNKNOWN	DURANTON-TECHNISEM	Aubergine	Solanum		melongena		NO	NO
MM 01686	99T87	2000	UNKNOWN	DOGANLAR-CORNELL UNIV.	Aubergine	Solanum	LEPTOSTEMONUM	TORVUM SW.	Wild	NO	NO
MM 01687	99T83	2000	UNKNOWN	DOGANLAR-CORNELL UNIV.	Aubergine	Solanum	LEPTOSTEMONUM	TORVUM SW.	Wild	NO	NO
MM 01688	PARC SIMIENS 1	2002	Ethiopia	INRAE	Aubergine	Solanum	LEPTOSTEMONUM	INCANUM L. (GROUPE A)	Wild	NO	YES
MM 01689	PARC SIMIENS 2	2002	Ethiopia	INRAE	Aubergine	Solanum	LEPTOSTEMONUM	ANGUIVI AGG.	Wild	NO	NO
MM 01690	PARC SIMIENS 3	2002	Ethiopia	INRAE	Aubergine	Solanum	LEPTOSTEMONUM	MARGINATUM L. FIL.	Wild	NO	NO
MM 01691	Nameless	2002	Japan	GEVES	Aubergine	Solanum	LEPTOSTEMONUM	AETHIOPICUM L. GR. GILO		NO	NO
MM 01692	SOXNA	2000	Senegal	DURANTON-TECHNISEM	Aubergine	Solanum	LEPTOSTEMONUM	AETHIOPICUM L. GR. KUMBA		NO	NO
MM 01693	N'DROWA	2002	Côte d'Ivoire	NONO WONDIM-TROPICASEM	Aubergine	Solanum	LEPTOSTEMONUM	AETHIOPICUM L. GR. GILO		NO	NO
MM 01694	LONGUE PAYS	2002	Réunion	NONO WONDIM-TROPICASEM	Aubergine	Solanum		melongena		NO	NO
MM 01695	MEKETAN N'GOYO DIE	2002	Mali	NONO WONDIM-TROPICASEM	Aubergine	Solanum	LEPTOSTEMONUM	AETHIOPICUM L. GR. KUMBA		NO	NO
MM 01696	BENTON DIANE	2002	UNKNOWN	NONO WONDIM-TROPICASEM	Aubergine	Solanum	LEPTOSTEMONUM	CERASIFERUM DUNAL (?)	Wild	NO	NO
MM 01698	S.15 BULAT KEUL	2002	Malaysia	CHEN-AVRDC	Aubergine	Solanum		melongena		NO	NO
MM 01699	S.52	2002	Malaysia	CHEN-AVRDC	Aubergine	Solanum	LEPTOSTEMONUM	MACROCARPON L.		NO	NO
MM 01700	S.78	2002	Thailand	CHEN-AVRDC	Aubergine	Solanum		melongena		NO	NO
MM 01701	S.108	2002	Philippines	CHEN-AVRDC	Aubergine	Solanum		melongena		NO	NO
MM 01702	S.144	2002	Philippines	CHEN-AVRDC	Aubergine	Solanum		melongena		NO	NO
MM 01703	S.203	2002	UNKNOWN	CHEN-AVRDC	Aubergine	Solanum		melongena		NO	NO
MM 01703 BIS	S.203	2002	UNKNOWN	CHEN-AVRDC	Aubergine	Solanum		melongena		NO	NO
MM 01704	S.211	2002	India	CHEN-AVRDC	Aubergine	Solanum		melongena		NO	NO
MM 01705	S.357A	2002	China	CHEN-AVRDC	Aubergine	Solanum		melongena		NO	NO
MM 01706	S.362	2002	India	CHEN-AVRDC	Aubergine	Solanum		melongena		NO	NO
MM 01706 BIS	S.362	2002	India	CHEN-AVRDC	Aubergine	Solanum		melongena		NO	NO
MM 01706 quater	S. 362	2002	India	CHEN-AVRDC	Aubergine	Solanum		melongena		NO	NO
MM 01706 TER	S.362	2002	India	CHEN-AVRDC	Aubergine	Solanum		melongena		NO	NO
MM 01707	SM 264/S.411 (ou SM164/S.411)	2002	Sri Lanka	CHEN-AVRDC	Aubergine	Solanum		melongena		NO	NO
MM 01708	S.698	2002	UNKNOWN	CHEN-AVRDC	Aubergine	Solanum		melongena		NO	NO
MM 01709	S.736	2002	UNKNOWN	CHEN-AVRDC	Aubergine	Solanum		melongena		NO	NO
MM 01710	DONGLING	2002	China	GOULPAUT-VILMORIN	Aubergine	Solanum		melongena		NO	NO
MM 01711	LONGUE NOIRE	2002	China	GOULPAUT-VILMORIN	Aubergine	Solanum		melongena		NO	NO
MM 01712	LIAONING N°4	2002	China	GOULPAUT-VILMORIN	Aubergine	Solanum		melongena		NO	NO
MM 01713	AUB. NAINE A FRUIT MAUVE	2002	United States of America	HALLARD-HORTISEM	Aubergine	Solanum		melongena		NO	YES
MM 01715	Nameless	2001	Japan	GEVES	Aubergine	Solanum	LEPTOSTEMONUM	MAMMOSUM L.	Wild	NO	NO
MM 01716	Nameless	2001	Japan	GEVES	Aubergine	Solanum	LEPTOSTEMONUM	AETHIOPICUM L. GR. GILO		NO	NO
MM 01717	Nameless	2002	Japan	GEVES	Aubergine	Solanum	LEPTOSTEMONUM	AETHIOPICUM L. GR. GILO		NO	NO
MM 01724	BOGOR 2	2000	Indonesia	INRAE	Aubergine	Solanum		melongena		NO	YES
MM 01725	Oultroranii [F1] (1)	2003	Ukraine	SHABETJA-INST. VEGET.& MELONS	Aubergine	Solanum		melongena	Advanced or improved cultivar	NO	YES
MM 01725 bis	Oultroranii [F1] (2)	2003	Ukraine	SHABETJA-INST. VEGET.& MELONS	Aubergine	Solanum		melongena	Advanced or improved cultivar	NO	YES
MM 01726	FIALKA	2003	Ukraine	SHABETJA-INST. VEGET.& MELONS	Aubergine	Solanum		melongena		NO	YES
MM 01726 BIS	FIALKA	2003	Ukraine	SHABETJA-INST. VEGET.& MELONS	Aubergine	Solanum		melongena		NO	NO
MM 01727	DONIETZKII OUROJ	2003	Ukraine	SHABETJA-INST. VEGET.& MELONS	Aubergine	Solanum		melongena		NO	YES
MM 01728	EGGPLANT LOCAL, OP1 (SEGUELA)	2003	Côte d'Ivoire	SEMINIS VIA DOGANLAR	Aubergine	Solanum	LEPTOSTEMONUM	AETHIOPICUM L. GR. GILO		NO	NO
MM 01729	EGGPLANT LOCAL, OP2	2003	Côte d'Ivoire	SEMINIS VIA DOGANLAR	Aubergine	Solanum	LEPTOSTEMONUM	AETHIOPICUM L. GR. GILO		NO	NO
MM 01730	EGGPLANT LOCAL, OP3	2003	Côte d'Ivoire	SEMINIS VIA DOGANLAR	Aubergine	Solanum	LEPTOSTEMONUM	AETHIOPICUM L. GR. GILO		NO	NO
MM 01731	EGGPLANT LOCAL, OP4	2003	Côte d'Ivoire	SEMINIS VIA DOGANLAR	Aubergine			A DETERMINER		NO	NO
MM 01732	EGGPLANT LOCAL, OP5	2003	Côte d'Ivoire	SEMINIS VIA DOGANLAR	Aubergine	Solanum	LEPTOSTEMONUM	AETHIOPICUM L. GR. GILO		NO	NO
MM 01733	EGGPLANT LOCAL, OP6	2010	Côte d'Ivoire	SEMINIS VIA DOGANLAR	Aubergine	Solanum		melongena		NO	YES
MM 01734	EGGPLANT LOCAL, OP7	2003	Côte d'Ivoire	SEMINIS VIA DOGANLAR	Aubergine			A DETERMINER		NO	NO
MM 01735	EGGPLANT LOCAL, OP8	2003	Côte d'Ivoire	SEMINIS VIA DOGANLAR	Aubergine			A DETERMINER		NO	NO
MM 01736	EGGPLANT LOCAL, OP9	2003	Côte d'Ivoire	SEMINIS VIA DOGANLAR	Aubergine	Solanum	LEPTOSTEMONUM	AETHIOPICUM L. GR. GILO		NO	NO
MM 01737	EGGPLANT LOCAL, OP10 (ABIDJAN)	2003	Côte d'Ivoire	SEMINIS VIA DOGANLAR	Aubergine	Solanum	LEPTOSTEMONUM	AETHIOPICUM L. GR. GILO		NO	NO
MM 01739	EGGPLANT LOCAL, OP12 (ABIDJAN)	2003	Côte d'Ivoire	SEMINIS VIA DOGANLAR	Aubergine			A DETERMINER		NO	NO
MM 01740	EGGPLANT LOCAL, OP13	2003	Côte d'Ivoire	SEMINIS VIA DOGANLAR	Aubergine	Solanum	LEPTOSTEMONUM	AETHIOPICUM L. GR. GILO		NO	NO
MM 01741	EGGPLANT LOCAL, OP14	2003	Côte d'Ivoire	SEMINIS VIA DOGANLAR	Aubergine			A DETERMINER		NO	NO
MM 01742	EGGPLANT LOCAL, OP15	2003	Côte d'Ivoire	SEMINIS VIA DOGANLAR	Aubergine			A DETERMINER		NO	NO
MM 01743	EGGPLANT LOCAL, OP16 (ABIDJAN)	2003	Côte d'Ivoire	SEMINIS VIA DOGANLAR	Aubergine			A DETERMINER		NO	NO
MM 01744	964750006	2003	UNKNOWN	VAN DER WEERDEN	Aubergine	CYPHOMANDRA		BETACEA	Wild	NO	NO
MM 01745	884750011	2003	UNKNOWN	VAN DER WEERDEN	Aubergine	Atropa		belladonna		NO	NO
MM 01746	924750016	2003	UNKNOWN	VAN DER WEERDEN	Aubergine	Solanum	LEPTOSTEMONUM	QUITOENSE LAM.	Wild	NO	NO
MM 01747	924750024	2003	UNKNOWN	VAN DER WEERDEN	Aubergine	Datura		inoxia		NO	NO
MM 01748	984750056	2003	UNKNOWN	VAN DER WEERDEN	Aubergine	Physalis		sp.		NO	NO
MM 01749	984750073	2003	UNKNOWN	VAN DER WEERDEN	Aubergine	Physalis		PERUVIANA		NO	NO
MM 01750	LISTADA DE GANDIA	2003	Spain	PROHENS-UNIV. POLYTECHNICA-VALENCIA	Aubergine	Solanum		melongena		NO	NO
MM 01751	BELEZZA NERA	2003	Italy	POLIGNANO-IST. DEL GERMOPLASMA CNR	Aubergine	Solanum		melongena		NO	NO
MM 01752	EG 203 (SURYA)	2004	India	AVRDC	Aubergine	Solanum		melongena		NO	YES
MM 01753	MAYOTTE	2004	Mayotte	HUAT-CIRAD	Aubergine	Solanum	LEPTOSTEMONUM	RICHARDII DUNAL	Wild	NO	NO
MM 01754	Nameless	2004	Sudan	INRAE	Aubergine	Solanum	LEPTOSTEMONUM	COAGULANS FORSSK.	Wild	NO	NO
MM 01757	Nameless	2004	Cuba	INRAE	Aubergine	Solanum	LEPTOSTEMONUM	CAPSICOIDES ALL.	Wild	NO	NO
MM 01758	Nameless	2004	Cuba	INRAE	Aubergine	Solanum	LEPTOSTEMONUM	MAMMOSUM L.	Wild	NO	NO
MM 01759	TARON	2004	Armenia	SARIKYAN-SC. CENT. OF VEG. AND IND. CROPS	Aubergine	Solanum		melongena		NO	NO
MM 01759 bis	TARON	2004	Armenia	SARIKYAN-SC. CENT. OF VEG. AND IND. CROPS	Aubergine	Solanum		melongena		NO	YES
MM 01760	YEREKO	2004	Armenia	SARIKYAN-SC. CENT. OF VEG. AND IND. CROPS	Aubergine	Solanum		melongena		NO	YES
MM 01762	NIJ 99475081 OU NIJ 99475088	2004	UNKNOWN	VAN DER WEERDEN	Aubergine	Solanum	LEPTOSTEMONUM	PALINACANTHUM DUNAL	Wild	NO	NO
MM 01763	NIJ 814750085	2004	UNKNOWN	VAN DER WEERDEN	Aubergine	Solanum	LEPTOSTEMONUM	RIGESCENS JACQ.	Wild	NO	YES
MM 01766	ANATOLIA	2005	Turkey	DOGANLAR-IZMIR INST. OF TECHNOLOGY	Aubergine	Solanum	LEPTOSTEMONUM	TORVUM SW.	Wild	NO	NO
MM 01767	VILLASIMIUS (CA)	2004	Italy	DALMON-LAB. NAT. PROT. VEGETAUX	Aubergine	Solanum	LEPTOSTEMONUM	LINNAEANUM HEPPER & JAEGER	Wild	NO	NO
MM 01768	EARLY ROUND MARKET	2006	India	INRAE	Aubergine	Solanum		melongena		NO	YES
MM 01768 BIS	EARLY ROUND MARKET	2006	India	INRAE	Aubergine	Solanum		melongena		NO	NO
MM 01768 ter	EARLY ROUND MARKET	2006	India	INRAE	Aubergine	Solanum		melongena		NO	YES
MM 01769	LARGE ROUND PURPLE	2006	India	INRAE	Aubergine	Solanum		melongena		NO	YES
MM 01770	VRAC COLLECTION	2006	Senegal	TECHNISEM	Aubergine	Solanum	LEPTOSTEMONUM	AETHIOPICUM L. GR. GILO-KUMBA		NO	NO
MM 01771	PINAR DEL RIO VINALES	2006	Cuba	INRAE	Aubergine	Solanum	LEPTOSTEMONUM	VIARUM DUNAL	Wild	NO	NO
MM 01772	KUMASAMBA LODGE NEAR KAFUE RIVER (BOHS06-66)	2006	Zambia	L. BOHS-UNIV. OF UTAH	Aubergine			A DETERMINER		NO	NO
MM 01773	KUMASAMBA LODGE NEAR KAFUE RIVER (BOHS06-67)	2006	Zambia	L. BOHS-UNIV. OF UTAH	Aubergine			A DETERMINER		NO	NO
MM 01774	KUMASAMBA LODGE NEAR KAFUE RIVER (BOHS06-70)	2006	Zambia	L. BOHS-UNIV. OF UTAH	Aubergine	Solanum	LEPTOSTEMONUM	AETHIOPICUM L. GR. GILO		NO	NO
MM 01775	KUMASAMBA LODGE NEAR KAFUE RIVER (BOHS06-71)	2006	Zambia	L. BOHS-UNIV. OF UTAH	Aubergine	Solanum	LEPTOSTEMONUM	AETHIOPICUM L. GR. GILO		NO	NO
MM 01777	NSOBE GAME CAMP, NDOLA DISTRICT (BOHS06-73)	2006	Zambia	L. BOHS-UNIV. OF UTAH	Aubergine	Solanum		INCANUM L. (GROUPE A)	Wild	NO	NO
MM 01779	SAINT PIERRE	2007	Réunion	J. AGRAPART-CIRAD	Aubergine	Solanum		AURICULATUM	Wild	NO	NO
MM 01780	TAMPON	2007	Réunion	J. AGRAPART-CIRAD	Aubergine	Solanum		TORVUM	Wild	NO	NO
MM 01781	BAHIA-1	2006	Brazil	GEVES	Aubergine	Solanum		LASIOCARPA	Wild	NO	NO
MM 01782	BAHIA-2	2006	Brazil	GEVES	Aubergine	Solanum	LEPTOSTEMONUM	SP. (LASIOCARPA)		NO	NO
MM 01783	YUNNAN-1	2007	China	GEVES	Aubergine	Solanum		VIARUM ?	Wild	NO	NO
MM 01785	JINGDIAN	2007	China	JINGDIAN SEEDS	Aubergine	Solanum		melongena		NO	NO
MM 01786	SAPA	2007	Viet Nam	INRAE	Aubergine	Solanum		VIARUM ?	Wild	NO	NO
MM 01787	YUNNAN-3	2007	China	GEVES	Aubergine	Solanum	LEPTOSTEMONUM	MELONGENA L.		NO	NO
MM 01788 [A]	Nameless	2014	Italy	INCAO SEEDS	Aubergine	Solanum		melongena		NO	NO
MM 01788 [B]	Nameless	2014	Italy	INCAO SEEDS	Aubergine	Solanum		melongena		NO	NO
MM 01789	SMALL & GREEN FRUIT	2008	Viet Nam	N.T.T.- HIEN-FRUIT & VEG. RES. INST.-HANOI	Aubergine	Solanum		melongena		NO	YES
MM 01789 BIS	SMALL & GREEN FRUIT	2008	Viet Nam	N.T.T.- HIEN-FRUIT & VEG. RES. INST.-HANOI	Aubergine	Solanum		melongena		NO	NO
MM 01790	SMALL & WHITE FRUIT	2008	Viet Nam	N.T.T.- HIEN-FRUIT & VEG. RES. INST.-HANOI	Aubergine	Solanum		melongena	Traditional cultivar	NO	YES
MM 01790 bis	SMALL & WHITE FRUIT	2008	Viet Nam	N.T.T.- HIEN-FRUIT & VEG. RES. INST.-HANOI	Aubergine	Solanum		melongena		NO	YES
MM 01791	BIG & VIOLET FRUIT	2008	Viet Nam	N.T.T.- HIEN-FRUIT & VEG. RES. INST.-HANOI	Aubergine	Solanum		melongena		NO	NO
MM 01792	BIG & ROUND FRUIT	2008	Viet Nam	N.T.T.- HIEN-FRUIT & VEG. RES. INST.-HANOI	Aubergine	Solanum		melongena		NO	NO
MM 01792 (F)	Nameless	2008	Viet Nam	N.T.T.- HIEN-FRUIT & VEG. RES. INST.-HANOI	Aubergine	Solanum		melongena		NO	NO
MM 01792 (G)	Nameless	2008	Viet Nam	N.T.T.- HIEN-FRUIT & VEG. RES. INST.-HANOI	Aubergine	Solanum		melongena		NO	NO
MM 01792 [A]	BIG & ROUND FRUIT	2008	Viet Nam	N.T.T.- HIEN-FRUIT & VEG. RES. INST.-HANOI	Aubergine	Solanum		melongena		NO	YES
MM 01792 [B]	BIG & ROUND FRUIT	2008	Viet Nam	N.T.T.- HIEN-FRUIT & VEG. RES. INST.-HANOI	Aubergine	Solanum		melongena		NO	YES
MM 01792 [C]	BIG & ROUND FRUIT	2008	Viet Nam	N.T.T.- HIEN-FRUIT & VEG. RES. INST.-HANOI	Aubergine	Solanum		melongena		NO	YES
MM 01792 [D]	BIG & ROUND FRUIT	2008	Viet Nam	N.T.T.- HIEN-FRUIT & VEG. RES. INST.-HANOI	Aubergine	Solanum		melongena		NO	YES
MM 01792 [E]	BIG & ROUND FRUIT	2008	Viet Nam	N.T.T.- HIEN-FRUIT & VEG. RES. INST.-HANOI	Aubergine	Solanum		melongena		NO	YES
MM 01792 [G]	Big and round fruit	UNKNOWN	Viet Nam	N.T.T.- HIEN-FRUIT & VEG. RES. INST.-HANOI	Aubergine	Solanum		melongena		NO	YES
MM 01793	S. GLAUCOPHYLLUM	2009	UNKNOWN	NIJMEGEN BOT. GARD. VIA GEVES	Aubergine	Solanum		GLAUCOPHYLLUM	Wild	NO	NO
MM 01794	S. GLAUCOPHYLLUM	2009	UNKNOWN	NIJMEGEN BOT. GARD. VIA GEVES	Aubergine	Solanum		GLAUCOPHYLLUM	Wild	NO	NO
MM 01795	S. GLAUCOPHYLLUM	2009	UNKNOWN	NIJMEGEN BOT. GARD. VIA GEVES	Aubergine	Solanum		GLAUCOPHYLLUM	Wild	NO	NO
MM 01796	S. GLAUCOPHYLLUM	2009	Argentina	NIJMEGEN BOT. GARD. VIA GEVES	Aubergine	Solanum		GLAUCOPHYLLUM	Wild	NO	NO
MM 01797	BRINGELLE/BRINZELLE (ou Bringelle Maurice)	2009	Mauritius	INRAE	Aubergine	Solanum		melongena		NO	YES
MM 01798	ANGHIVE	2009	Mauritius	INRAE	Aubergine			A DETERMINER		NO	NO
MM 01799	LS 2436	2009	Malaysia	K.ABAK-UNIV.CUKUROVA	Aubergine	Solanum		melongena		NO	YES
MM 01800	S56B (TERONG HIJAU)	2009	Indonesia	AVRDC	Aubergine	Solanum		melongena		NO	YES
MM 01801	Nameless	2009	Spain	INRAE	Aubergine			A DETERMINER		NO	NO
MM 01802	IBIZA	2009	Spain	INRAE	Aubergine			A DETERMINER		NO	NO
MM 01803	P4 WHITE FRUIT	2009	Egypt	SALAH A. MOHAMEDIEN-AGRIC. RES. CENTRE DEP. VEGETABLE	Aubergine	Solanum		melongena		NO	YES
MM 01804	P9 WHITE FRUIT	2009	Egypt	SALAH A. MOHAMEDIEN-AGRIC. RES. CENTRE DEP. VEGETABLE	Aubergine	Solanum		melongena		NO	YES
MM 01805	P10 WHITE FRUIT	2009	Egypt	SALAH A. MOHAMEDIEN-AGRIC. RES. CENTRE DEP. VEGETABLE	Aubergine	Solanum		melongena		NO	NO
MM 01805 BIS	P10 WHITE FRUIT	2009	Egypt	SALAH A. MOHAMEDIEN-AGRIC. RES. CENTRE DEP. VEGETABLE	Aubergine	Solanum		melongena		NO	YES
MM 01806	P4 X P9 WHITE WITH PURPLE STREAKS	2009	Egypt	SALAH A. MOHAMEDIEN-AGRIC. RES. CENTRE DEP. VEGETABLE	Aubergine	Solanum		melongena		NO	NO
MM 01807	P4 X P10 WHITE WITH PURPLE STREAKS	2009	Egypt	SALAH A. MOHAMEDIEN-AGRIC. RES. CENTRE DEP. VEGETABLE	Aubergine	Solanum		melongena		NO	NO
MM 01808	MATTU GULLA Hors type	2009	India	N. DHILLON-PUNJAB AGRIC. UNIV.	Aubergine	Solanum		melongena	Traditional cultivar	NO	YES
MM 01809	Nameless	2009	UNKNOWN	INRAE	Aubergine	Solanum		LINNAEANUM AFF.	Wild	NO	NO
MM 01810	VINETTE ou Vinete ("AUBERGINE" EN ROUMAIN)	2009	Romania	E. GREGOIRE-VILMORIN	Aubergine	Solanum		melongena	Traditional cultivar	NO	YES
MM 01811	EG 203 SURYA	2009	India	J.F WANG-AVRDC	Aubergine	Solanum		melongena		NO	NO
MM 01812	EG048, Black Beauty	2009	Denmark	J.F WANG-AVRDC	Aubergine	Solanum		melongena		NO	NO
MM 01813	CASTELLANA	2010	Italy	N. POLIGNANO-C.N.R.	Aubergine			A DETERMINER		NO	NO
MM 01814	ROTONDA	2010	Italy	N. POLIGNANO-C.N.R.	Aubergine			A DETERMINER		NO	NO
MM 01815	Angela (F1)	2010	UNKNOWN	RIJK ZWAAN	Aubergine	Solanum		melongena		NO	NO
MM 01816	LEROGI FOREST - MARALAL	2010	Kenya	R. PASQUET-ICIPE	Aubergine	Solanum		ACULEATISSIMUM JACQ.	Wild	NO	NO
MM 01817	NIJ 814750073	2010	UNKNOWN	RIJK ZAWNN	Aubergine	Solanum		TORVUM SW.	Wild	NO	NO
MM 01818	NIJ 944750128	2010	UNKNOWN	RIJK ZWANN	Aubergine	Solanum		INDICUM SSP. GRANDIFRONS	Wild	NO	NO
MM 01819	NIJ 944750056	2000	UNKNOWN	VAN DER WEERDEN	Aubergine	Datura		WRIGHTII REGEL	Wild	NO	NO
MM 01820	SUMA 21 B2	2001	UNKNOWN	PERON-INST. NAT. HORT.-ANGERS	Aubergine	Solanum	POTATOE	MURICATUM AIT.	Wild	NO	NO
MM 01821	513/1141	2001	UNKNOWN	PERON-INST. NAT. HORT.-ANGERS	Aubergine	Solanum	POTATOE	MURICATUM AIT.	Wild	NO	NO
MM 01822	SUMA 131	2001	UNKNOWN	PERON-INST. NAT. HORT.-ANGERS	Aubergine	Solanum	POTATOE	MURICATUM AIT.	Wild	NO	NO
MM 01823	F1 DOURGA	1986	UNKNOWN	GONDIA	Aubergine	Solanum		melongena	Hybrid	NO	NO
MM 01824	CASPER	1986	UNKNOWN	STOKES SEEDS	Aubergine	Solanum		melongena	Hybrid	NO	NO
MM 01825	YAN ZI QIE (II6BO136)	2010	China	CHIN. ACAD. AGRIC. SCI.	Aubergine	Solanum		melongena		NO	YES
MM 01826	ZI CHANG QIE (II6BO139)	2010	China	CHIN. ACAD. AGRIC. SCI.	Aubergine	Solanum		melongena		NO	YES
MM 01827	PENG TOU QUIE (II6BO328)	2010	China	CHIN. ACAD. AGRIC. SCI.	Aubergine	Solanum		melongena		NO	YES
MM 01827 bis	PENG TOU QUIE (II6B0328)	2010	China	CHIN. ACAD. AGRIC. SCI.	Aubergine	Solanum		melongena		NO	YES
MM 01828	HE BAO QIE (1) (II6BO329)	2010	China	CHIN. ACAD. AGRIC. SCI.	Aubergine	Solanum		melongena		NO	NO
MM 01829	HE BAO QIE (2) (II6BO331)	2010	China	CHIN. ACAD. AGRIC. SCI.	Aubergine	Solanum		melongena		NO	YES
MM 01830	HE BAO QIE (3) (II6BO377)	2010	China	CHIN. ACAD. AGRIC. SCI	Aubergine	Solanum		melongena		NO	NO
MM 01831	LIAN TANG QIE (II6BO689)	2010	China	CHIN. ACAD. AGRIC SCI.	Aubergine	Solanum		melongena		NO	NO
MM 01832	O.P. (ou Movilita)	2010	Romania	E. GREGOIRE-VILMORIN	Aubergine	Solanum		melongena		NO	NO
MM 01833	PING TUNG	2010	UNKNOWN	R. PORETAZ-KOKOPELLI	Aubergine	Solanum		melongena		NO	YES
MM 01835	TZSY-SHUI (VIR-697)	2010	China	POTAGER DU ROI	Aubergine	Solanum		melongena		NO	NO
MM 01836	B. FIOLETOVYI	2010	Russian Federation	POTAGER DU ROI	Aubergine	Solanum		melongena		NO	YES
MM 01837	KONSERVNYI-10 (VIR-653)	2010	Russian Federation	POTAGER DU ROI	Aubergine	Solanum		melongena		NO	NO
MM 01838	VIR-1034	2010	Viet Nam	POTAGER DU ROI	Aubergine	Solanum		MELONGENA (GROUPE G)	Wild	NO	YES
MM 01839	Nameless	2011	China	INRAE	Aubergine	Solanum		VIARUM	Wild	NO	NO
MM 01840	UPV.23378 - BIRM/S.1034	2011	Unknown	M.J. DIEZ-UNIV.POLITEC.-VALENCIA	Aubergine	Solanum	POTATOE	CARIPENSE DUNAL	Wild	NO	NO
MM 01841	UPV.23386 - BIRM/S.1975	2011	Unknown	M.J. DIEZ-UNIV.POLITEC.-VALENCIA	Aubergine	Solanum	POTATOE	CANENSE RYDB.	Wild	NO	NO
MM 01842	UPV. 23392 - BIRM/S.1981	2011	Unknown	M.J. DIEZ-UNIV.POLITEC.-VALENCIA	Aubergine	Solanum	POTATOE	TRACHYCARPUM BITTER & SODIRO	Wild	NO	NO
MM 01843	N.24	2011	Unknown	M.DIOUF-TROPICASEM	Aubergine		LEPTOSTEMONUM	A DETERMINER		NO	NO
MM 01844	HEART SHAPE	2011	Unknown	M.DIOUF-TROPICASEM	Aubergine		LEPTOSTEMONUM	A DETERMINER		NO	NO
MM 01845	LOCALE GAYA	2011	Niger	M.DIOUF-TROPICASEM	Aubergine		LEPTOSTEMONUM	A DETERMINER		NO	NO
MM 01846	SANGUIWILI	2011	Mali	M.DIOUF-TROPICASEM	Aubergine		LEPTOSTEMONUM	A DETERMINER		NO	NO
MM 01847	MANYIRE GREEN	2011	Unknown	M.DIOUF-TROPICASEM	Aubergine		LEPTOSTEMONUM	A DETERMINER		NO	NO
MM 01848	ZOUNGOU	2011	Burkina Faso	M.DIOUF-TROPICASEM	Aubergine		LEPTOSTEMONUM	A DETERMINER		NO	NO
MM 01849	CABROUSSE	2011	Senegal	M.DIOUF-TROPICASEM	Aubergine		LEPTOSTEMONUM	A DETERMINER		NO	NO
MM 01850	U.V.P.P.	2011	Unknown	M.DIOUF-TROPICASEM	Aubergine		LEPTOSTEMONUM	A DETERMINER		NO	NO
MM 01851	PIMENT TOMATE ROUGE	2011	Peru	INRAE	Aubergine			A DETERMINER		NO	NO
MM 01852	PETITS FRUITS OBLONGS ROUGES	2011	Peru	INRAE	Aubergine			A DETERMINER		NO	NO
MM 01853	SMALL ROUND WHITE (TH-009051)	2011	Thailand	EAST-WEST SEED CO	Aubergine	Solanum		melongena		NO	NO
MM 01854	OBLONG WHITE (TH-009052)	2011	Thailand	EAST-WEST SEED CO	Aubergine	Solanum		melongena		NO	NO
MM 01854 BIS	OBLONG WHITE (TH-009052)	2017	Thailand	EAST-WEST SEED CO	Aubergine	Solanum		melongena		NO	NO
MM 01855	LOEI OP (TH-008015)	2011	Thailand	EAST-WEST SEED CO	Aubergine	Solanum		melongena		NO	NO
MM 01857	KANJANABURI OP (TH-05255)	2011	Thailand	EAST-WEST SEED CO	Aubergine	Solanum		melongena		NO	NO
MM 01858	KHAI MA (TH-005215)	2011	Thailand	EAST-WEST SEED CO	Aubergine	Solanum		melongena		NO	NO
MM 01859	NAN OP (TH-005102)	2011	Thailand	EAST-WEST SEED CO	Aubergine	Solanum		melongena		NO	NO
MM 01860	YAW KIEW MAN (TH-005053)	2011	Thailand	EAST-WEST SEED CO	Aubergine	Solanum		melongena		NO	NO
MM 01861	RADCHABURI OP (TH-008277)	2011	Thailand	EAST-WEST SEED CO	Aubergine	Solanum		melongena		NO	NO
MM 01862	LOCAL MYANMAR (TH-007280)	2011	Myanmar	EAST-WEST SEED CO	Aubergine	Solanum		melongena		NO	NO
MM 01863	PALE PURPLE, BIG ROUND SHAPE (TH-009446)	2011	Myanmar	EAST-WEST SEED CO	Aubergine	Solanum		melongena		NO	NO
MM 01864	LOCAL VIETNAM 1 (TH-008344)	2011	Viet Nam	EAST-WEST SEED CO	Aubergine	Solanum		melongena		NO	NO
MM 01865	LOCAL VIETNAM 2 (TH-008345)	2011	Viet Nam	EAST-WEST SEED CO	Aubergine	Solanum		melongena		NO	NO
MM 01866	LOCAL OP VIETNAM (TH-009061)	2011	Viet Nam	EAST-WEST SEED CO	Aubergine	Solanum		melongena		NO	NO
MM 01867	LAOS (TH-004445)	2011	Lao People's Democratic Republic	EAST-WEST SEED CO	Aubergine	Solanum		melongena		NO	NO
MM 01868	LOCAL INDONESIA KM (TH-004436)	2011	Indonesia	EAST-WEST SEED CO	Aubergine	Solanum		melongena		NO	NO
MM 01869	CALCUTTA (TH-008269)	2011	India	EAST-WEST SEED CO	Aubergine	Solanum		melongena		NO	NO
MM 01870	SREEMAM GREEN STAR (TH-005225)	2011	India	EAST-WEST SEED CO	Aubergine	Solanum		melongena		NO	NO
MM 01871	LOCAL EGGPLANT BANGLADESH (TH-009060)	2011	Bangladesh	EAST-WEST SEED CO	Aubergine	Solanum		melongena		NO	NO
MM 01871 BIS	LOCAL EGGPLANT BANGLADESH (TH-009060)	2017	Bangladesh	EAST-WEST SEED CO	Aubergine	Solanum		melongena		NO	NO
MM 01872	WHITE GREEN ROUND (TH-009473)	2011	Bangladesh	EAST-WEST SEED CO	Aubergine	Solanum		melongena		NO	NO
MM 01872 BIS	WHITE GREEN ROUND (TH-009473)	2017	Bangladesh	EAST-WEST SEED CO	Aubergine	Solanum		melongena		NO	NO
MM 01873	LIGHT PURPLE OBLONG (TH-009474)	2011	Bangladesh	EAST-WEST SEED CO	Aubergine	Solanum		melongena		NO	NO
MM 01874	BRINJAL CROWN (TH-09059)	2011	Sri Lanka	EAST-WEST SEED CO	Aubergine	Solanum		melongena		NO	NO
MM 01875	LOCAL OP SRILANKA (TH-009338)	2011	Sri Lanka	EAST-WEST SEED CO	Aubergine	Solanum		melongena		NO	NO
MM 01876	CHIANG RAI (EWS, SFA AGRIC. FARM)	2011	Thailand	INRAE	Aubergine			A DETERMINER		NO	NO
MM 01877	OUEST CHIANG MAI	2011	Thailand	INRAE	Aubergine	Solanum		KURZII BRACE & PRAIN	Wild	NO	YES
MM 01878	Nameless	2011	Thailand	INRAE	Aubergine			A DETERMINER		NO	NO
MM 01879	Nameless	2011	Thailand	INRAE	Aubergine			A DETERMINER		NO	NO
MM 01880	MAEMA LAI MARKET	2011	Thailand	INRAE	Aubergine	Solanum		MELONGENA L. (GROUPE G/H)		NO	NO
MM 01881	MC 28, WHITE FRUITS	2011	Thailand	INRAE	Aubergine	Solanum		melongena	Hybrid	NO	NO
MM 01882	MC 46, FLEURS BLANCHES	2011	Thailand	INRAE	Aubergine	Solanum	LEPTOSTEMONUM	MELONGENA L. (GROUPE F)	Wild	NO	NO
MM 01883	MC 47, OP VARIETY, FRUIT VERT	2011	Thailand	INRAE	Aubergine	Solanum	LEPTOSTEMONUM	MELONGENA L.	Traditional cultivar	NO	NO
MM 01884	MC 64	2011	Thailand	INRAE	Aubergine	Solanum	LEPTOSTEMONUM	MELONGENA L.	Wild	NO	NO
MM 01885	MC 66, FRUITS EN GRAPPE, FLEURS BLANCHES	2011	Thailand	INRAE	Aubergine	Solanum	LEPTOSTEMONUM	MELONGENA L.		NO	NO
MM 01886	MC 67, FRUITS EN GRAPPES, FLEURS VIOLETTES	2011	Thailand	INRAE	Aubergine	Solanum	LEPTOSTEMONUM	MELONGENA L.	Traditional cultivar	NO	NO
MM 01887	MC 104, FRUIT VERT TRES CLAIR UNIFORME	2011	Thailand	INRAE	Aubergine	Solanum	LEPTOSTEMONUM	MELONGENA L.	Wild	NO	NO
MM 01888	MC 107, PLANTE TRES HAUTE	2011	Thailand	INRAE	Aubergine	Solanum	LEPTOSTEMONUM	MELONGENA L.	Wild	NO	NO
MM 01889	MC 109, EPINES SUR CALICE	2011	Thailand	INRAE	Aubergine	Solanum	LEPTOSTEMONUM	MELONGENA L.	Wild	NO	NO
MM 01890	MC 119, BEAUCOUP D'EPINES SUR CALICE	2011	Thailand	INRAE	Aubergine	Solanum	LEPTOSTEMONUM	MELONGENA L.	Wild	NO	NO
MM 01891	MC 121, PORT ETALE	2011	Thailand	INRAE	Aubergine	Solanum	LEPTOSTEMONUM	MELONGENA L.	Wild	NO	NO
MM 01892	MC 124, PORT ETALE	2011	Thailand	INRAE	Aubergine	Solanum	LEPTOSTEMONUM	MELONGENA L.	Wild	NO	NO
MM 01893	MC 158, PORT RAMPANT, TRES PETITS FRUITS BLANCS	2011	Thailand	INRAE	Aubergine	Solanum	LEPTOSTEMONUM	MELONGENA L.	Other	NO	NO
MM 01894	MC 165, SUPERBE SPECIMEN	2011	Thailand	INRAE	Aubergine	Solanum	LEPTOSTEMONUM	MELONGENA L.	Wild	NO	NO
MM 01895	MC 171	2011	Thailand	INRAE	Aubergine	Solanum	LEPTOSTEMONUM	MELONGENA L.	Wild	NO	NO
MM 01896	MC 172, EPINES SUR CALICE ET PLANTE	2011	Thailand	INRAE	Aubergine	Solanum	LEPTOSTEMONUM	MELONGENA L.	Wild	NO	NO
MM 01897	"MC 173, ""GROS"" FRUITS (DIAMETRE 3,8 CM)"	2011	Thailand	INRAE	Aubergine	Solanum	LEPTOSTEMONUM	MELONGENA L.	Wild	NO	NO
MM 01898	MC 184, FRUITS RONDS ET BLANCS (DIAMETRE 2,5 CM)	2011	Thailand	INRAE	Aubergine	Solanum	LEPTOSTEMONUM	MELONGENA L.	Wild	NO	NO
MM 01899	MC 197, PORT TRES ETALE	2011	Thailand	INRAE	Aubergine	Solanum	LEPTOSTEMONUM	MELONGENA L.	Wild	NO	NO
MM 01900	MC 205	2011	Thailand	INRAE	Aubergine	Solanum	LEPTOSTEMONUM	MELONGENA L.	Traditional cultivar	NO	NO
MM 01901	MC 253	2011	Thailand	INRAE	Aubergine	Solanum	LEPTOSTEMONUM	MELONGENA L.	Wild	NO	NO
MM 01902	MC 264, INFLORESCENCE MULTIFLORE	2011	Thailand	INRAE	Aubergine	Solanum	LEPTOSTEMONUM	MELONGENA L.	Wild	NO	NO
MM 01903	MC 276	2011	Thailand	INRAE	Aubergine	Solanum	LEPTOSTEMONUM	MELONGENA L.	Wild	NO	NO
MM 01904	MC 278, FLEURS BLANCHES	2011	Thailand	INRAE	Aubergine	Solanum	LEPTOSTEMONUM	MELONGENA L.	Wild	NO	NO
MM 01905	MC 287, FLEURS BLANCHES	2011	Thailand	INRAE	Aubergine	Solanum	LEPTOSTEMONUM	MELONGENA L.	Wild	NO	NO
MM 01906	MC 292, FRUIT ROND BLANC APLATI	2011	Thailand	INRAE	Aubergine	Solanum	LEPTOSTEMONUM	MELONGENA L.		NO	NO
MM 01907	MC 293	2011	Thailand	INRAE	Aubergine	Solanum	LEPTOSTEMONUM	MELONGENA L.	Wild	NO	NO
MM 01908	MC 298	2011	Thailand	INRAE	Aubergine	Solanum	LEPTOSTEMONUM	MELONGENA L.		NO	NO
MM 01909	MC 308, CALICE EPINEUX	2011	Thailand	INRAE	Aubergine	Solanum	LEPTOSTEMONUM	MELONGENA L.	Wild	NO	NO
MM 01910	MC 329, FRUIT CROQUANT (= CULTIVE)	2011	Thailand	INRAE	Aubergine	Solanum	LEPTOSTEMONUM	MELONGENA L.	Traditional cultivar	NO	NO
MM 01911	AODAIMARU	2011	Japan	TOKITA SEED VIA NIVTS	Aubergine	Solanum		melongena		NO	NO
MM 01912	DAIOUAKANASU	2011	Japan	SANYO SEED CO VIA NIVTS	Aubergine	Solanum		melongena		NO	NO
MM 01913	ENPITSUNASU	2011	Japan	FUJISAKI SEED CO	Aubergine	Solanum		melongena		NO	NO
MM 01914	HAKATANAGA	2011	Japan	KANEKO SEED VIA NIVTS	Aubergine	Solanum		melongena		NO	NO
MM 01915	HETAMURASAKINASU	2011	Japan	MATSUSITA SEED CO VIA NIVTS	Aubergine	Solanum		melongena		NO	NO
MM 01916	KAMONASU	2011	Japan	MARUTANE CO VIA NIVTS	Aubergine	Solanum		melongena		NO	NO
MM 01917	KINCHAKUNASU	2011	Japan	KOMESAN CO VIA NIVTS	Aubergine	Solanum		melongena		NO	NO
MM 01918	KITTA	2011	Japan	NIVTS	Aubergine	Solanum		melongena		NO	NO
MM 01919	KITTACHUUNAGA	2011	Japan	MARUTANE CO VIA NIVTS	Aubergine	Solanum		melongena		NO	NO
MM 01920	KUMAMOTONAGANASU	2011	Japan	NIVTS	Aubergine	Solanum		melongena		NO	NO
MM 01921	KURUMENASU	2011	Japan	MARUTANE CO VIA NIVTS	Aubergine	Solanum		melongena		NO	NO
MM 01922	NAKATE SHINKURO	2011	Japan	NIVTS	Aubergine	Solanum		melongena		NO	NO
MM 01923	NASHINASU	2011	Japan	KOMESAN CO VIA NIVTS	Aubergine	Solanum		melongena		NO	NO
MM 01924	OBUSENASU	2011	Japan	TSURUSHIN SEED VIA NIVTS	Aubergine	Solanum		melongena		NO	NO
MM 01925	SADOWARANASU	2011	Japan	KAJITA SEED CO VIA NIVTS	Aubergine	Solanum		melongena		NO	NO
MM 01926	SENDAINAGA	2011	Japan	WATANABE SEED VIA NIVTS	Aubergine	Solanum		melongena		NO	NO
MM 01927	SENSHUUMIZUNASU	2011	Japan	AKAMATSU SEED VIA NIVTS	Aubergine	Solanum		melongena		NO	NO
MM 01928	SHIROMARUNASU	2011	Japan	TAKARA SEED VIA NIVTS	Aubergine	Solanum		melongena		NO	NO
MM 01929	SHIRONAGANASU	2011	Japan	TAKARA SEED VIA NIVTS	Aubergine	Solanum		melongena		NO	NO
MM 01930	TAYANASU	2011	Japan	HAGITANE VIA NIVTS	Aubergine	Solanum		melongena		NO	NO
MM 01931	WASESHINKURO	2011	Japan	KANEKO SEED VIA NIVTS	Aubergine	Solanum		melongena		NO	NO
MM 01932	YAMASHINANASU	2011	Japan	MARUTANE CO VIA NIVTS	Aubergine	Solanum		melongena		NO	NO
MM 01933	LS 1934	2011	Malaysia	NIVTS	Aubergine	Solanum		melongena		NO	YES
MM 01934	DEMI LONG BLANC ZEBRE ROSE	2012	Maldives	INRAE	Aubergine	Solanum		melongena		NO	NO
MM 01935	SAUVAGE A FRUITS RONDS, DIAMETRE MOYEN	2012	Maldives	INRAE	Aubergine			A DETERMINER		NO	NO
MM 01936	Nameless	2012	Maldives	INRAE	Aubergine			A DETERMINER		NO	NO
MM 01937	NIJ 884750065	2012	UNKNOWN	G. VAN DER WEERDEN-RADBOUD UNIV.	Aubergine	Nicandra		PHYSALOIDES		NO	NO
MM 01938	FRUITS JAUNES	2012	Namibia	J.N.PLAGES-INRAE	Aubergine	Solanum		INCANUM L. (GROUPE D)	Wild	NO	NO
MM 01941	GPS 18░ 52 N - 98░ 05 E	2012	Thailand	INRAE	Aubergine			A DETERMINER		NO	NO
MM 01942	MARCHE DE BANGKOK	2012	Thailand	INRAE	Aubergine	Solanum		melongena		NO	NO
MM 01943	T15,W12 (GPS 17░ 53 N - 104░ 14 E)	2012	Thailand	INRAE	Aubergine	Solanum		MELONGENA (GROUPE F)	Wild	NO	NO
MM 01944	T16,C51	2012	Thailand	INRAE	Aubergine	Solanum		melongena		NO	NO
MM 01944 BIS	T16,C51	2017	Thailand	INRAE	Aubergine	Solanum		melongena		NO	NO
MM 01945	T16,C52 (GPS 17░ 11 N - 104░ 42 E)	2012	Thailand	INRAE	Aubergine			A DETERMINER		NO	NO
MM 01946	T16,W56	2012	Thailand	INRAE	Aubergine	Solanum		melongena		NO	NO
MM 01946 BIS	T16,W56	2017	Thailand	INRAE	Aubergine	Solanum		melongena		NO	NO
MM 01947	T16,C62 (GPS 17░ 11 N - 104░ 42 E)	2012	Thailand	INRAE	Aubergine	Solanum		MELONGENA (GROUPE F)	Wild	NO	NO
MM 01948	T17,W4 (GPS 17░ 12 N - 104░ 43 E)	2012	Thailand	INRAE	Aubergine	Solanum		MELONGENA (GROUPE F)	Wild	NO	NO
MM 01949	T19,W37 (GPS 16░ 21 N - 103░ 34 E)	2012	Thailand	INRAE	Aubergine	Solanum		MELONGENA (GROUPE F)	Wild	NO	NO
MM 01950	T20,C10 (GPS 17░ 21 N - 103░ 08 E)	2012	Thailand	INRAE	Aubergine	Solanum		MELONGENA (GROUPE F)	Wild	NO	NO
MM 01951	KHUN PHAEN T2002	2012	Thailand	INRAE	Aubergine	Solanum		melongena		NO	NO
MM 01952	KHROB-KHAO TA089	2012	Thailand	INRAE	Aubergine	Solanum		MELONGENA (GROUPE G)		NO	NO
MM 01953	ROUND EGGPLANT	2012	Thailand	INRAE	Aubergine	Solanum		melongena		NO	NO
MM 01954	ROUND EGGPLANT	2012	Thailand	INRAE	Aubergine	Solanum		melongena		NO	NO
MM 01955	Long eggplant (FULLNESS 1505 ?)	2012	Thailand	INRAE	Aubergine	Solanum		melongena		NO	NO
MM 01956	KHUNCHANG TA095	2012	Thailand	INRAE	Aubergine	Solanum		melongena		NO	NO
MM 01957	ROUTE DE KITALE A SUAM	2012	Kenya	R. PASQUET-ICIPE	Aubergine	Solanum		INCANUM L. (GROUPE A)	Wild	NO	NO
MM 01958	ROUTE DE KITALE A SUAM	2012	Kenya	R. PASQUET-ICIPE	Aubergine	Solanum		INCANUM L. (GROUPE A)	Wild	NO	YES
MM 01959	Nameless	2012	Sudan	INRAE	Aubergine			A DETERMINER		NO	NO
MM 01960	Nameless	2012	Sudan	INRAE	Aubergine	Solanum		INCANUM L. (GROUPE C)	Wild	NO	NO
MM 01961	Nameless	2013	Kenya	INRAE	Aubergine			A DETERMINER		NO	NO
MM 01962	BRINJAL ROUND	2013	India	Private individual	Aubergine	Solanum		melongena		NO	NO
MM 01963	4NS2F40 (4X)	2013	UNKNOWN	VILMORIN SEMENCES	Aubergine	Solanum		melongena		NO	NO
MM 01964	FERGANA 1	2013	Uzbekistan	Private individual	Aubergine	Solanum		melongena		NO	NO
MM 01964 BIS	Fergana 1	2013	Uzbekistan	Private individual	Aubergine	Solanum		melongena		NO	NO
MM 01965	FERGANA 2	2013	Uzbekistan	Private individual	Aubergine	Solanum		melongena		NO	NO
MM 01966	Nameless	2013	Réunion	ROUX CUVELIER	Aubergine	Solanum	LEPTOSTEMONUM	TORVUM A CONFIRMER	Wild	NO	NO
MM 01967	Noire hâtive	2016	France	Institut Vavilov via conservatoire régional Ile de France (G.Debarle)	Aubergine	Solanum		melongena		NO	NO
MM 01968	Monstrueuse de New York	2016	UNKNOWN	Conservatoire régional d'ile de France	Aubergine	Solanum		melongena		NO	NO
MM 01969	Nameless	2016	Peru	INRAE	Aubergine	Solanum		A DETERMINER		NO	NO
MM 01970	CHITWAN NATIONAL PARK	2016	Nepal	INRAE	Aubergine	Solanum		A DETERMINER	Wild	NO	NO
MM 01971	NALA	2016	Nepal	INRAE	Aubergine	Solanum		A DETERMINER	Wild	NO	NO
MM 01972	GHANDRUNG	2016	Nepal	INRAE	Aubergine	Solanum		A DETERMINER		NO	NO
MM 01973	Nameless	2017	Thailand	UNKNOWN	Aubergine	Solanum	Leptostemonum	melongena		NO	NO
MM 01974	Nameless	2017	Thailand	INRAE	Aubergine	Solanum	Leptostemonum	melongena		NO	NO
MM 01975	67/3	2017	Italy	UNKNOWN	Aubergine	Solanum	Leptostemonum	melongena	Breeder's material	NO	NO
MM 01977	Angivy Sainte Marie	2017	Madagascar	Private individual	Aubergine	Solanum	Leptostemonum	A DETERMINER		NO	NO
MM 01978	Angivy Tananarive	2017	Madagascar	Private individual	Aubergine	Solanum	Leptostemonum	A DETERMINER		NO	NO
MM 01979	Angivy Toamasina	2017	Madagascar	Private individual	Aubergine	Solanum	Leptostemonum	A DETERMINER		NO	NO
MM 01980	Nameless	2017	Malaysia	GEVES	Aubergine	Solanum	Leptostemonum	A DETERMINER	Traditional cultivar	NO	NO
MM 01981	Soxna	2017	Senegal	Centre de Développement de l'Horticulture (CDH) Dakar	Aubergine	Solanum	Leptostemonum	AETHIOPICUM L. GR KUMBA	Traditional cultivar	NO	NO
MM 01982	K2681	2017	Unknown	VIR	Aubergine	Solanum	Solanum	A DETERMINER	Traditional cultivar	NO	NO
MM 01983	Nameless	2017	UNKNOWN	Private individual	Aubergine	Solanum	Leptostemonum	A DETERMINER		NO	NO
MM 01985	Nameless	2017	Thailand	UNKNOWN	Aubergine	Solanum		MELONGENA L. GROUPE G	Traditional cultivar	NO	NO
MM 01986	Calebasse verte	2017	Guadeloupe	UNKNOWN	Aubergine	Solanum		melongena	Traditional cultivar	NO	NO
MM 01987	Porcelaine blanche	2017	Guadeloupe	UNKNOWN	Aubergine	Solanum		melongena	Traditional cultivar	NO	NO
MM 01988	Alaman	2018	French Guiana	Private individual	Aubergine	Solanum		A DETERMINER	Wild	NO	NO
MM 01989	Nameless	2018	French Guiana	Private individual	Aubergine	Solanum		A DETERMINER	Wild	NO	NO
MM 01990	Cocona	2018	French Guiana	Private individual	Aubergine	Solanum		A DETERMINER		NO	NO
MM 01991	Groseille	2018	French Guiana	Private individual	Aubergine	Solanum		A DETERMINER		NO	NO
MM 01992	Nameless	2018	French Guiana	Private individual	Aubergine	Solanum		A DETERMINER	Wild	NO	NO
MM 01993	Hatiyé bis	2019	France	INRAE	Aubergine	Solanum		AETHIOPICUM L. GR. GILO		NO	NO
MM 01994	Reunionita bis	2019	France	INRAE	Aubergine	Solanum		MACROCARPON L.		NO	NO
MM 01995	GB-01832	2020	Thailand	EAST-WEST SEED CO	Aubergine	Solanum		TORVUM SW.	Wild	NO	NO
MM 01996	GB-01833	2020	Philippines	EAST-WEST SEED CO	Aubergine	Solanum		TORVUM SW.	Wild	NO	NO
MM 01997	GB-01834	2020	Philippines	EAST-WEST SEED CO	Aubergine	Solanum		TORVUM SW.	Wild	NO	NO
MM 01998	GB-01835	2020	Thailand	EAST-WEST SEED CO	Aubergine	Solanum		TORVUM SW.	Wild	NO	NO
MM 01999	GB-01836	2020	Thailand	EAST-WEST SEED CO	Aubergine	Solanum		TORVUM SW.	Wild	NO	NO
MM 02000	GB-01837	2020	Thailand	EAST-WEST SEED CO	Aubergine	Solanum		TORVUM SW.	Wild	NO	NO
MM 02001	GB-01838	2020	Thailand	EAST-WEST SEED CO	Aubergine	Solanum		TORVUM SW.	Wild	NO	NO
MM 02002	PUSA HYBRID-9 type B	1999	India	I.A.R.I.	Aubergine	Solanum		melongena		NO	NO
MM 02003	PUSA HYBRID-9 type C	1999	India	I.A.R.I.	Aubergine	Solanum		melongena		NO	NO
MM 02004	PUSA HYBRID-9 type A	1999	India	I.A.R.I.	Aubergine	Solanum		melongena		NO	NO
MM 02005	spiny kurzii	2015	Mozambique	Rémy Pasquet-CNRS	Aubergine	Solanum		A DETERMINER	Wild	NO	NO
MM 02006	Nameless	2015	Zimbabwe	Rémy Pasquet-CNRS	Aubergine	Solanum		A DETERMINER	Wild	NO	NO
MM 02007	Nameless	2015	Zambia	Rémy Pasquet-CNRS	Aubergine	Solanum		A DETERMINER	Wild	NO	NO
MM 02008	Tomate des antropophages	UNKNOWN	UNKNOWN	UNKNOWN	Aubergine	Solanum		A DETERMINER	#N/A	NO	NO
MM 02009	Nameless	UNKNOWN	UNKNOWN	UNKNOWN	Aubergine	Brunfelsia		pauciflora	#N/A	NO	NO
MM 02010	BATEMEgg4	UNKNOWN	Turkey	UNKNOWN	Aubergine	Solanum		melongena	#N/A	NO	NO
MM 02011	BATEMEgg8	UNKNOWN	Turkey	UNKNOWN	Aubergine	Solanum		melongena	#N/A	NO	NO
MM 02012	BATEMEgg31	UNKNOWN	Turkey	UNKNOWN	Aubergine	Solanum		melongena	#N/A	NO	NO
MM 02013	AM_005	UNKNOWN	Italy	UNKNOWN	Aubergine	Solanum		melongena	#N/A	NO	NO
MM 02014	AM_052	UNKNOWN	Italy	UNKNOWN	Aubergine	Solanum		melongena	#N/A	NO	NO
MM 02015	AM_123	UNKNOWN	India	UNKNOWN	Aubergine	Solanum		melongena	#N/A	NO	NO
MM 02016	AM_145	UNKNOWN	Italy	UNKNOWN	Aubergine	Solanum		melongena	#N/A	NO	NO
MM 02017	AM_158	UNKNOWN	India	UNKNOWN	Aubergine	Solanum		melongena	#N/A	NO	NO
MM 02018	AM_175	UNKNOWN	Italy	UNKNOWN	Aubergine	Solanum		melongena	#N/A	NO	NO
MM 02019	AM_211	UNKNOWN	Italy	UNKNOWN	Aubergine	Solanum		melongena	#N/A	NO	NO
MM 02020	AM_280	UNKNOWN	China	UNKNOWN	Aubergine	Solanum		melongena	#N/A	NO	NO
MM 02021	AM_290	UNKNOWN	China	UNKNOWN	Aubergine	Solanum		melongena	#N/A	NO	NO
MM 02022	AM_322	UNKNOWN	Italy	UNKNOWN	Aubergine	Solanum		melongena	#N/A	NO	NO
MM 02023	AM_371	UNKNOWN	Italy	UNKNOWN	Aubergine	Solanum		melongena	#N/A	NO	NO
MM 02024	AM_378	UNKNOWN	Italy	UNKNOWN	Aubergine	Solanum		melongena	#N/A	NO	NO
MM 02025	SOL 821	UNKNOWN	Turkey	UNKNOWN	Aubergine	Solanum		melongena	#N/A	NO	NO
MM 02026	SOL 829	UNKNOWN	The former Yugoslav Republic of Macedonia	UNKNOWN	Aubergine	Solanum		melongena	#N/A	NO	NO
MM 02027	SOL 841	UNKNOWN	Ukraine	UNKNOWN	Aubergine	Solanum		melongena	#N/A	NO	NO
MM 02028	BGV001232	UNKNOWN	Spain	UNKNOWN	Aubergine	Solanum		melongena	#N/A	NO	NO
MM 02029	BGV001234	UNKNOWN	Spain	UNKNOWN	Aubergine	Solanum		melongena	#N/A	NO	NO
MM 02030	BGV002382	UNKNOWN	Spain	UNKNOWN	Aubergine	Solanum		melongena	#N/A	NO	NO
MM 02031	BGV004438	UNKNOWN	Spain	UNKNOWN	Aubergine	Solanum		melongena	#N/A	NO	NO
MM 02032	BGV005773	UNKNOWN	Spain	UNKNOWN	Aubergine	Solanum		melongena	#N/A	NO	NO
MM 02033	BGV005777	UNKNOWN	Spain	UNKNOWN	Aubergine	Solanum		melongena	#N/A	NO	NO
MM 02034	BGV005780	UNKNOWN	Spain	UNKNOWN	Aubergine	Solanum		melongena	#N/A	NO	NO
MM 02035	BGV005784	UNKNOWN	Spain	UNKNOWN	Aubergine	Solanum		melongena	#N/A	NO	NO
MM 02036	BGV015835	UNKNOWN	Spain	UNKNOWN	Aubergine	Solanum		melongena	#N/A	NO	NO
MM 02037	BGV015836	UNKNOWN	Spain	UNKNOWN	Aubergine	Solanum		melongena	#N/A	NO	NO
MM 02038	CGN17530	UNKNOWN	Iran (Islamic Republic of)	UNKNOWN	Aubergine	Solanum		melongena	#N/A	NO	NO
MM 02039	CGN17548	UNKNOWN	India	UNKNOWN	Aubergine	Solanum		melongena	#N/A	NO	NO
MM 02040	CGN17550	UNKNOWN	India	UNKNOWN	Aubergine	Solanum		melongena	#N/A	NO	NO
MM 02041	CGN18481	UNKNOWN	India	UNKNOWN	Aubergine	Solanum		melongena	#N/A	NO	NO
MM 02042	CGN18524	UNKNOWN	China	UNKNOWN	Aubergine	Solanum		melongena	#N/A	NO	NO
MM 02043	CGN18774	UNKNOWN	Thailand	UNKNOWN	Aubergine	Solanum		melongena	#N/A	NO	NO
MM 02044	CGN23302	UNKNOWN	Netherlands	UNKNOWN	Aubergine	Solanum		melongena	#N/A	NO	NO
MM 02045	CGN23325	UNKNOWN	Iran (Islamic Republic of)	UNKNOWN	Aubergine	Solanum		melongena	#N/A	NO	NO
MM 02046	CGN23326	UNKNOWN	China	UNKNOWN	Aubergine	Solanum		melongena	#N/A	NO	NO
MM 02047	CGN23335	UNKNOWN	India	UNKNOWN	Aubergine	Solanum		melongena	#N/A	NO	NO
MM 02048	CGN23358	UNKNOWN	China	UNKNOWN	Aubergine	Solanum		melongena	#N/A	NO	NO
MM 02049	VI034848	UNKNOWN	Malaysia	UNKNOWN	Aubergine	Solanum		melongena	#N/A	NO	NO
MM 02050	VI034852	UNKNOWN	Fiji	UNKNOWN	Aubergine	Solanum		melongena	#N/A	NO	NO
MM 02051	VI034855	UNKNOWN	Malaysia	UNKNOWN	Aubergine	Solanum		melongena	#N/A	NO	NO
MM 02052	VI039431	UNKNOWN	Bangladesh	UNKNOWN	Aubergine	Solanum		melongena	#N/A	NO	NO
MM 02053	VI039477	UNKNOWN	Bangladesh	UNKNOWN	Aubergine	Solanum		melongena	#N/A	NO	NO
MM 02054	VI039526	UNKNOWN	Bangladesh	UNKNOWN	Aubergine	Solanum		melongena	#N/A	NO	NO
MM 02055	VI039557	UNKNOWN	Bangladesh	UNKNOWN	Aubergine	Solanum		melongena	#N/A	NO	NO
MM 02056	VI039564	UNKNOWN	Bangladesh	UNKNOWN	Aubergine	Solanum		melongena	#N/A	NO	NO
MM 02057	VI039568	UNKNOWN	Bangladesh	UNKNOWN	Aubergine	Solanum		melongena	#N/A	NO	NO
MM 02058	VI039587	UNKNOWN	Bangladesh	UNKNOWN	Aubergine	Solanum		melongena	#N/A	NO	NO
MM 02059	VI040021	UNKNOWN	Thailand	UNKNOWN	Aubergine	Solanum		melongena	#N/A	NO	NO
MM 02060	VI040317	UNKNOWN	Thailand	UNKNOWN	Aubergine	Solanum	var serpentinum	melongena	#N/A	NO	NO
MM 02061	VI040360	UNKNOWN	Thailand	UNKNOWN	Aubergine	Solanum		melongena	#N/A	NO	NO
MM 02062	VI040574	UNKNOWN	Thailand	UNKNOWN	Aubergine	Solanum		melongena	#N/A	NO	NO
MM 02063	VI040589	UNKNOWN	Thailand	UNKNOWN	Aubergine	Solanum		melongena	#N/A	NO	NO
MM 02064	VI041809	UNKNOWN	India	UNKNOWN	Aubergine	Solanum		melongena	#N/A	NO	NO
MM 02065	VI041837	UNKNOWN	India	UNKNOWN	Aubergine	Solanum		melongena	#N/A	NO	NO
MM 02066	VI041902	UNKNOWN	India	UNKNOWN	Aubergine	Solanum		melongena	#N/A	NO	NO
MM 02067	VI042152	UNKNOWN	India	UNKNOWN	Aubergine	Solanum		melongena	#N/A	NO	NO
MM 02068	VI042323	UNKNOWN	India	UNKNOWN	Aubergine	Solanum		melongena	#N/A	NO	NO
MM 02069	VI042362	UNKNOWN	Turkey	UNKNOWN	Aubergine	Solanum		melongena	#N/A	NO	NO
MM 02070	VI042389	UNKNOWN	Turkey	UNKNOWN	Aubergine	Solanum		melongena	#N/A	NO	NO
MM 02071	VI042568	UNKNOWN	Philippines	UNKNOWN	Aubergine	Solanum		melongena	#N/A	NO	NO
MM 02072	VI042614	UNKNOWN	India	UNKNOWN	Aubergine	Solanum		melongena	#N/A	NO	NO
MM 02073	VI042617	UNKNOWN	India	UNKNOWN	Aubergine	Solanum		melongena	#N/A	NO	NO
MM 02074	VI042680	UNKNOWN	India	UNKNOWN	Aubergine	Solanum		melongena	#N/A	NO	NO
MM 02075	VI042826	UNKNOWN	Republic of Korea	UNKNOWN	Aubergine	Solanum		melongena	#N/A	NO	NO
MM 02076	VI042832	UNKNOWN	China	UNKNOWN	Aubergine	Solanum		melongena	#N/A	NO	NO
MM 02077	VI043016	UNKNOWN	Indonesia	UNKNOWN	Aubergine	Solanum		melongena	#N/A	NO	NO
MM 02078	VI044675	UNKNOWN	Thailand	UNKNOWN	Aubergine	Solanum		melongena	#N/A	NO	NO
MM 02079	VI044689	UNKNOWN	Thailand	UNKNOWN	Aubergine	Solanum		melongena	#N/A	NO	NO
MM 02080	VI044722	UNKNOWN	Thailand	UNKNOWN	Aubergine	Solanum		melongena	#N/A	NO	NO
MM 02081	VI044782	UNKNOWN	Thailand	UNKNOWN	Aubergine	Solanum		melongena	#N/A	NO	NO
MM 02082	VI045554	UNKNOWN	Bangladesh	UNKNOWN	Aubergine	Solanum		melongena	#N/A	NO	NO
MM 02083	VI054926	UNKNOWN	Lao People's Democratic Republic	UNKNOWN	Aubergine	Solanum		melongena	#N/A	NO	NO
MM 02084	VI054954	UNKNOWN	Lao People's Democratic Republic	UNKNOWN	Aubergine	Solanum		melongena	#N/A	NO	NO
MM 02085	VI055266	UNKNOWN	Malaysia	UNKNOWN	Aubergine	Solanum		melongena	#N/A	NO	NO
MM 02086	BGV016353	UNKNOWN	Israel	UNKNOWN	Aubergine	Solanum		incanum	#N/A	NO	NO
MM 02087	BGV016355	UNKNOWN	France	UNKNOWN	Aubergine	Solanum		melongena	#N/A	NO	NO
MM 10001	RNL 002/GBONGBO	2004	Benin	LESTER-BIRMINGHAM UNIV.	Aubergine	Solanum	LEPTOSTEMONUM	DASYPHYLLUM THONN.	Wild	NO	NO
MM 10001 BIS	RNL 002 BIS/GBONGBO	2004	Benin	LESTER-BIRMINGHAM UNIV.	Aubergine	Solanum	LEPTOSTEMONUM	MACROCARPON L.		NO	NO
MM 10006	RNL 009/AGBITSA	2004	Benin	LESTER-BIRMINGHAM UNIV.	Aubergine	Solanum	LEPTOSTEMONUM	MACROCARPON L.		NO	NO
MM 10007	RNL 010/AGBITSA	2004	Benin	LESTER-BIRMINGHAM UNIV.	Aubergine	Solanum	LEPTOSTEMONUM	AETHIOPICUM L. GR. GILO		NO	NO
MM 10010	RNL 014/GBOMA	2004	Benin	LESTER-BIRMINGHAM UNIV.	Aubergine	Solanum	LEPTOSTEMONUM	MACROCARPON L.		NO	NO
MM 10012	RNL 016/GBOMA	2004	Benin	LESTER-BIRMINGHAM UNIV.	Aubergine	Solanum	LEPTOSTEMONUM	MACROCARPON L.		NO	NO
MM 10013	RNL 019/AGBITSA	2004	Benin	LESTER-BIRMINGHAM UNIV.	Aubergine	Solanum		melongena		NO	NO
MM 10019	RNL 029	2004	Benin	LESTER-BIRMINGHAM UNIV.	Aubergine	Solanum		melongena		NO	NO
MM 10022	RNL 032/COCOTCHJMOUH (YOM)	2004	Benin	LESTER-BIRMINGHAM UNIV.	Aubergine	Solanum	LEPTOSTEMONUM	DASYPHYLLUM THONN.	Wild	NO	NO
MM 10024	RNL 035/GBOMA	2004	Togo	LESTER-BIRMINGHAM UNIV.	Aubergine	Solanum	LEPTOSTEMONUM	MACROCARPON L.		NO	NO
MM 10028	RNL 041/GBOMA (LAMBA)	2004	Togo	LESTER-BIRMINGHAM UNIV.	Aubergine	Solanum	LEPTOSTEMONUM	MACROCARPON L.		NO	NO
MM 10038	RNL 051/GBOMA (LOSSO)	2004	Togo	LESTER-BIRMINGHAM UNIV.	Aubergine	Solanum	LEPTOSTEMONUM	MACROCARPON L.		NO	NO
MM 10054	RNL 070/GBOMA (KOTOKOLI)	2004	Togo	LESTER-BIRMINGHAM UNIV.	Aubergine	Solanum	LEPTOSTEMONUM	MACROCARPON L.		NO	NO
MM 10058	RNL 074/GBOMA (KABYE)	2004	Togo	LESTER-BIRMINGHAM UNIV.	Aubergine	Solanum	LEPTOSTEMONUM	MACROCARPON L.		NO	NO
MM 10060	RNL 076/UTAN (AKPOSSO)	2004	Togo	LESTER-BIRMINGHAM UNIV.	Aubergine	Solanum	LEPTOSTEMONUM	AETHIOPICUM L. GR. GILO		NO	NO
MM 10064	RNL 080/GBOMA (ANA)	2004	Togo	LESTER-BIRMINGHAM UNIV.	Aubergine	Solanum	LEPTOSTEMONUM	MACROCARPON L.		NO	NO
MM 10070	RNL 087/UTAN (AKPOSSO)	2004	Togo	LESTER-BIRMINGHAM UNIV.	Aubergine	Solanum	LEPTOSTEMONUM	AETHIOPICUM L. GR. GILO		NO	NO
MM 10071	RNL 088/GBOMA (EWE)	2004	Togo	LESTER-BIRMINGHAM UNIV.	Aubergine	Solanum	LEPTOSTEMONUM	MACROCARPON L.		NO	NO
MM 10076	RNL 093/EDIGBOMA (EWE)	2004	Togo	LESTER-BIRMINGHAM UNIV.	Aubergine	Solanum		AETHIOPICUM L. GR. GILO		NO	NO
MM 10078	RNL 095	2004	Togo	LESTER-BIRMINGHAM UNIV.	Aubergine	Solanum	LEPTOSTEMONUM	AETHIOPICUM L. GR. SHUM		NO	NO
MM 10079	RNL 097/AGBITSHA (EWE)	2004	Togo	LESTER-BIRMINGHAM UNIV.	Aubergine	Solanum	LEPTOSTEMONUM	AETHIOPICUM L. GR. GILO		NO	NO
MM 10081	RNL 099/EGBOE (EWE)	2004	Togo	LESTER-BIRMINGHAM UNIV.	Aubergine	Solanum	SOLANUM	AMERICANUM MILL	Wild	NO	NO
MM 10083	RNL 101	2004	Togo	LESTER-BIRMINGHAM UNIV.	Aubergine	Solanum		melongena		NO	NO
MM 10084	RNL 102/AGBITSA (EWE)	2004	Togo	LESTER-BIRMINGHAM UNIV.	Aubergine	Solanum	LEPTOSTEMONUM	AETHIOPICUM L. GR. GILO		NO	NO
MM 10085	RNL 103/AGBITSA (EWE)	2004	Togo	LESTER-BIRMINGHAM UNIV.	Aubergine	Solanum	LEPTOSTEMONUM	AETHIOPICUM L. GR. GILO		NO	NO
MM 10086	RNL 104/AGBISTA (EWE)	2004	Togo	LESTER-BIRMINGHAM UNIV.	Aubergine	Solanum	LEPTOSTEMONUM	AETHIOPICUM L. GR. GILO		NO	NO
MM 10099	RNL 117/GBOMA	2004	Togo	LESTER-BIRMINGHAM UNIV.	Aubergine	Solanum	LEPTOSTEMONUM	MACROCARPON L.		NO	NO
MM 10102	RNL 120/GBOMA (EWE)	2004	Togo	LESTER-BIRMINGHAM UNIV.	Aubergine	Solanum	LEPTOSTEMONUM	MACROCARPON L.		NO	NO
MM 10105	RNL 123	2004	Togo	LESTER-BIRMINGHAM UNIV.	Aubergine	Solanum	LEPTOSTEMONUM	AETHIOPICUM L. GR. GILO		NO	NO
MM 10106	RNL 124/TE (EWE)	2004	Togo	LESTER-BIRMINGHAM UNIV.	Aubergine	Solanum	LEPTOSTEMONUM	AETHIOPICUM L. GR. GILO		NO	NO
MM 10112	RNL 132/GBOMA	2004	Togo	LESTER-BIRMINGHAM UNIV.	Aubergine	Solanum	LEPTOSTEMONUM	AETHIOPICUM L. GR. GILO		NO	NO
MM 10113	RNL 133/LAMA	2004	Togo	LESTER-BIRMINGHAM UNIV.	Aubergine	Solanum	SOLANUM	SCABRUM MILL.	Wild	NO	NO
MM 10114	RNL 136/AGBITSA	2004	Togo	LESTER-BIRMINGHAM UNIV.	Aubergine	Solanum	LEPTOSTEMONUM	AETHIOPICUM L. GR. GILO		NO	NO
MM 10116	RNL 138/GBOMA	2004	Togo	LESTER-BIRMINGHAM UNIV.	Aubergine	Solanum	LEPTOSTEMONUM	MACROCARPON L.		NO	NO
MM 10117	RNL 139/AGBITSA	2004	Togo	LESTER-BIRMINGHAM UNIV.	Aubergine	Solanum	LEPTOSTEMONUM	MACROCARPON L.		NO	NO
MM 10117 BIS	RNL 139 BIS/AGBITSA	2004	Togo	LESTER-BIRMINGHAM UNIV.	Aubergine	Solanum	LEPTOSTEMONUM	MACROCARPON L.		NO	NO
MM 10118	RNL 140/GOGOH (NDIOULA)	2004	Côte d'Ivoire	LESTER-BIRMINGHAM UNIV.	Aubergine	Solanum	LEPTOSTEMONUM	AETHIOPICUM L. GR. GILO-ANGUIVI		NO	NO
MM 10119	RNL 141/GOGOH (NDIOULA)	2004	Côte d'Ivoire	LESTER-BIRMINGHAM UNIV.	Aubergine	Solanum	LEPTOSTEMONUM	AETHIOPICUM L. GR. GILO		NO	NO
MM 10121	RNL 143/DAMSAH (NDIOULA)	2004	Côte d'Ivoire	LESTER-BIRMINGHAM UNIV.	Aubergine	Solanum	LEPTOSTEMONUM	ANGUIVI LAM.	Wild	NO	NO
MM 10122	RNL 144/GOGOH (NDIOULA)	2004	Côte d'Ivoire	LESTER-BIRMINGHAM UNIV.	Aubergine	Solanum	LEPTOSTEMONUM	MACROCARPON L.		NO	NO
MM 10123	RNL 145/GOGOH (NDIOULA)	2004	Côte d'Ivoire	LESTER-BIRMINGHAM UNIV.	Aubergine	Solanum	LEPTOSTEMONUM	AETHIOPICUM L. GR. GILO		NO	NO
MM 10127	RNL 150/GNAGNAN (ABEH)	2004	Burkina Faso	LESTER-BIRMINGHAM UNIV.	Aubergine	Solanum	LEPTOSTEMONUM	AETHIOPICUM L. GR. KUMBA		NO	NO
MM 10128	RNL 151/GOGOH (MOSSI)	2004	Burkina Faso	LESTER-BIRMINGHAM UNIV.	Aubergine	Solanum	LEPTOSTEMONUM	AETHIOPICUM L. GR. KUMBA		NO	NO
MM 10130	RNL 153/DAMSAH (MOSSI)	2004	Burkina Faso	LESTER-BIRMINGHAM UNIV.	Aubergine	Solanum	LEPTOSTEMONUM	ANGUIVI LAM.	Wild	NO	NO
MM 10131	RNL 154/DAMSAH (MOSSI)	2004	Burkina Faso	LESTER-BIRMINGHAM UNIV.	Aubergine	Solanum	LEPTOSTEMONUM	ANGUIVI LAM.	Wild	NO	NO
MM 10132	RNL 155/DAMSAH (MOSSI)	2004	Burkina Faso	LESTER-BIRMINGHAM UNIV.	Aubergine	Solanum	LEPTOSTEMONUM	ANGUIVI LAM.	Wild	NO	NO
MM 10144	RNL 173/BOUALE (DAGARE)	2004	Burkina Faso	LESTER-BIRMINGHAM UNIV.	Aubergine	Solanum		melongena		NO	NO
MM 10145	RNL 174/BOLO (GOUROUNSSI)	2004	Burkina Faso	LESTER-BIRMINGHAM UNIV.	Aubergine	Solanum	LEPTOSTEMONUM	MACROCARPON L.		NO	NO
MM 10147	RNL 178/AKANA (GOURMANCHI)	2004	Burkina Faso	LESTER-BIRMINGHAM UNIV.	Aubergine	Solanum	LEPTOSTEMONUM	AETHIOPICUM L. GR. KUMBA		NO	NO
MM 10148	RNL 179/IKANA (GOURMANCHI)	2004	Burkina Faso	LESTER-BIRMINGHAM UNIV.	Aubergine	Solanum	LEPTOSTEMONUM	AETHIOPICUM L. GR. GILO		NO	NO
MM 10150	RNL 184/ZANTOUDE (DAFIN)	2004	Burkina Faso	LESTER-BIRMINGHAM UNIV.	Aubergine	Solanum	LEPTOSTEMONUM	AETHIOPICUM L. GR. KUMBA		NO	NO
MM 10151	RNL 185/BORO (GOUROUNSI)	2004	Burkina Faso	LESTER-BIRMINGHAM UNIV.	Aubergine	Solanum	LEPTOSTEMONUM	MACROCARPON L.		NO	NO
MM 10152	RNL 188/KUMBA (MORE)	2004	Burkina Faso	LESTER-BIRMINGHAM UNIV.	Aubergine	Solanum	LEPTOSTEMONUM	AETHIOPICUM L. GR. KUMBA		NO	NO
MM 10155	RNL 194/FILO (GOIN)	2004	Burkina Faso	LESTER-BIRMINGHAM UNIV.	Aubergine	Solanum	LEPTOSTEMONUM	AETHIOPICUM L. GR. KUMBA		NO	NO
MM 10156	RNL 195/SALOA, KAGBOYOROGOU (GOIN)	2004	Burkina Faso	LESTER-BIRMINGHAM UNIV.	Aubergine	Solanum		melongena	Segregating population	NO	NO
MM 10160	RNL 203/BAKORONISSOU (SAMOGHO)	2004	Burkina Faso	LESTER-BIRMINGHAM UNIV.	Aubergine	Solanum		melongena		NO	NO
MM 10161	RNL 207/KOMBIE (DAGUIM)	2004	Burkina Faso	LESTER-BIRMINGHAM UNIV.	Aubergine	Solanum	LEPTOSTEMONUM	MACROCARPON L.		NO	NO
MM 10165	RNL 213/BOLO (GOUROUNSSI)	2004	Burkina Faso	LESTER-BIRMINGHAM UNIV.	Aubergine	Solanum	LEPTOSTEMONUM	MACROCARPON L.		NO	NO
MM 10167	RNL 216/IKANA (GOURMANCHI)	2004	Burkina Faso	LESTER-BIRMINGHAM UNIV.	Aubergine	Solanum	LEPTOSTEMONUM	AETHIOPICUM L. GR. KUMBA		NO	NO
MM 10170	RNL 224/KUMBWOBGO (MOSSI)	2004	Burkina Faso	LESTER-BIRMINGHAM UNIV.	Aubergine	Solanum	LEPTOSTEMONUM	AETHIOPICUM L. GR. KUMBA		NO	NO
MM 10172	RNL 231/NSUSUA (TWI)	2004	Ghana	LESTER-BIRMINGHAM UNIV.	Aubergine	Solanum	LEPTOSTEMONUM	ANGUIVI LAM.	Wild	NO	NO
MM 10174	RNL 233/NTROWA (TWI)	2004	Ghana	LESTER-BIRMINGHAM UNIV.	Aubergine	Solanum	LEPTOSTEMONUM	AETHIOPICUM L. GR. GILO		NO	NO
MM 10175	RNL 234/NTROWA (TWI)	2004	Ghana	LESTER-BIRMINGHAM UNIV.	Aubergine	Solanum	LEPTOSTEMONUM	AETHIOPICUM L. GR. GILO		NO	NO
MM 10176	RNL 235/NTROWA (TWI)	2004	Ghana	LESTER-BIRMINGHAM UNIV.	Aubergine	Solanum	LEPTOSTEMONUM	AETHIOPICUM L. GR. GILO		NO	NO
MM 10177	RNL 236/NTROWA (TWI)	2004	Ghana	LESTER-BIRMINGHAM UNIV.	Aubergine	Solanum	LEPTOSTEMONUM	AETHIOPICUM L. GR. GILO		NO	NO
MM 10179	RNL 239/ATROPO (TWI)	2004	Ghana	LESTER-BIRMINGHAM UNIV.	Aubergine	Solanum	LEPTOSTEMONUM	MACROCARPON L.		NO	NO
MM 10181	RNL 241/NTROWA (TWI)	2004	Ghana	LESTER-BIRMINGHAM UNIV.	Aubergine	Solanum	LEPTOSTEMONUM	AETHIOPICUM L. GR. GILO		NO	NO
MM 10183	RNL 243/NTROWA (TWI)	2004	Ghana	LESTER-BIRMINGHAM UNIV.	Aubergine	Solanum	LEPTOSTEMONUM	AETHIOPICUM L. GR. GILO		NO	NO
MM 10186	RNL 247/NTROWA (TWI)	2004	Ghana	LESTER-BIRMINGHAM UNIV.	Aubergine	Solanum	LEPTOSTEMONUM	AETHIOPICUM L. GR. GILO		NO	NO
MM 10187	RNL 248/NSUAMPIMAH (TWI)	2004	Ghana	LESTER-BIRMINGHAM UNIV.	Aubergine	Solanum	LEPTOSTEMONUM	AETHIOPICUM L. GR. GILO		NO	NO
MM 10188	RNL 249/NTROWA (TWI)	2004	Ghana	LESTER-BIRMINGHAM UNIV.	Aubergine	Solanum	LEPTOSTEMONUM	AETHIOPICUM L. GR. GILO		NO	NO
MM 10189	RNL 250/NSUAMPIMAH (TWI)	2004	Ghana	LESTER-BIRMINGHAM UNIV.	Aubergine	Solanum	LEPTOSTEMONUM	AETHIOPICUM L. GR. GILO		NO	NO
MM 10198	RNL 266/IVT 658	2003	Ghana	LESTER-BIRMINGHAM UNIV.	Aubergine			A DETERMINER		NO	NO
MM 10211	RNL 283/GBO (EWE)	2004	Ghana	LESTER-BIRMINGHAM UNIV.	Aubergine	Solanum	LEPTOSTEMONUM	MACROCARPON L.		NO	NO
MM 10213	RNL 287/NYADOA (TWI)	2004	Ghana	LESTER-BIRMINGHAM UNIV.	Aubergine	Solanum	LEPTOSTEMONUM	AETHIOPICUM L. GR. GILO		NO	NO
MM 10214	RNL 288/NYADOA (TWI)	2004	Ghana	LESTER-BIRMINGHAM UNIV.	Aubergine	Solanum	LEPTOSTEMONUM	AETHIOPICUM L. GR. GILO		NO	NO
MM 10217	RNL 298/NYADOA (TWI)	2004	Ghana	LESTER-BIRMINGHAM UNIV.	Aubergine	Solanum	LEPTOSTEMONUM	AETHIOPICUM L. GR. GILO		NO	NO
MM 10218	RNL 299/NSUSUA (TWI)	2004	Ghana	LESTER-BIRMINGHAM UNIV.	Aubergine	Solanum	LEPTOSTEMONUM	ANGUIVI LAM.	Wild	NO	NO
MM 10220	RNL 304/KATRE (GONJA)	2004	Ghana	LESTER-BIRMINGHAM UNIV.	Aubergine	Solanum	LEPTOSTEMONUM	AETHIOPICUM L. GR. GILO		NO	NO
MM 10221	RNL 306	2004	Ghana	LESTER-BIRMINGHAM UNIV.	Aubergine	Solanum		melongena		NO	NO
MM 10222	RNL 308/NYADOA (DAGBANI)	2004	Ghana	LESTER-BIRMINGHAM UNIV.	Aubergine	Solanum	LEPTOSTEMONUM	AETHIOPICUM L. GR. GILO		NO	NO
MM 10223	RNL 311/NTROPO (FANTI)	2004	Ghana	LESTER-BIRMINGHAM UNIV.	Aubergine	Solanum		melongena		NO	NO
MM 10224	RNL 312/NTROPO (FANTI)	2004	Ghana	LESTER-BIRMINGHAM UNIV.	Aubergine	Solanum		melongena		NO	NO
MM 10225	RNL 313/NTROPO (FANTI)	2004	Ghana	LESTER-BIRMINGHAM UNIV.	Aubergine	Solanum		melongena		NO	NO
MM 10226	RNL 317/NTROABA (FANTI)	2004	Ghana	LESTER-BIRMINGHAM UNIV.	Aubergine	Solanum	LEPTOSTEMONUM	AETHIOPICUM L. GR. GILO		NO	NO
MM 10227	RNL 318/NTROPO (FANTI)	2004	Ghana	LESTER-BIRMINGHAM UNIV.	Aubergine	Solanum	LEPTOSTEMONUM	MACROCARPON L.		NO	NO
MM 10233	RNL 324/TURA	2004	Zimbabwe	LESTER-BIRMINGHAM UNIV.	Aubergine	Solanum	LEPTOSTEMONUM	ACULEASTRUM DUNAL	Wild	NO	NO
MM 10235	RNL 329/MAPWANDA	2004	Zimbabwe	LESTER-BIRMINGHAM UNIV.	Aubergine	Solanum	LEPTOSTEMONUM	DASYPHYLLUM THONN.	Wild	NO	NO
MM 10240	RNL 335/MHARUPWA	2004	Zimbabwe	LESTER-BIRMINGHAM UNIV.	Aubergine	Solanum	LEPTOSTEMONUM	DASYPHYLLUM THONN.	Wild	NO	NO
MM 10241	RNL 336	2004	Zimbabwe	LESTER-BIRMINGHAM UNIV.	Aubergine	Solanum	LEPTOSTEMONUM	INCANUM L. (GROUPE B)	Wild	NO	NO
MM 10242	RNL 337	2004	Zimbabwe	LESTER-BIRMINGHAM UNIV.	Aubergine	Solanum	LEPTOSTEMONUM	INCANUM L. (GROUPE D)	Wild	NO	NO
MM 10243	RNL 338	2004	Zimbabwe	LESTER-BIRMINGHAM UNIV.	Aubergine	Solanum	LEPTOSTEMONUM	MAMMOSUM L.	Wild	NO	YES
MM 10244	RNL 339	2004	Zimbabwe	LESTER-BIRMINGHAM UNIV.	Aubergine	Solanum	LEPTOSTEMONUM	INCANUM L. (GROUPE B)	Wild	NO	NO
MM 10245	RNL 342/JILO	2004	Zambia	LESTER-BIRMINGHAM UNIV.	Aubergine	Solanum	LEPTOSTEMONUM	AETHIOPICUM L. GR. GILO		NO	NO
MM 10246	RNL 347/IMPWA	2004	Zambia	LESTER-BIRMINGHAM UNIV.	Aubergine	Solanum	LEPTOSTEMONUM	AETHIOPICUM L. GR. GILO		NO	NO
MM 10247	RNL 348/MDWA	2004	Zambia	LESTER-BIRMINGHAM UNIV.	Aubergine	Solanum	LEPTOSTEMONUM	AETHIOPICUM L. GR. GILO		NO	NO
MM 10248	RNL 363/JUMAIZ	2004	Sudan	LESTER-BIRMINGHAM UNIV.	Aubergine	Solanum	LEPTOSTEMONUM	INCANUM L. (GROUPE C)	Wild	NO	NO
MM 10250	RNL 365/KILERUE (ISALE)	2004	Ghana	LESTER-BIRMINGHAM UNIV.	Aubergine	Solanum	LEPTOSTEMONUM	AETHIOPICUM L. GR. KUMBA		NO	NO
MM 10251	RNL 366/KOMIE (DAGARTI)	2004	Ghana	LESTER-BIRMINGHAM UNIV.	Aubergine	Solanum	LEPTOSTEMONUM	AETHIOPICUM L. GR. KUMBA		NO	NO
MM 10252	RNL 367/ONTROPO (TWI)	2004	Ghana	LESTER-BIRMINGHAM UNIV.	Aubergine	Solanum	LEPTOSTEMONUM	MACROCARPON L.		NO	NO
MM 10254	RNL 369/ATROPO (TWI)	2004	Ghana	LESTER-BIRMINGHAM UNIV.	Aubergine	Solanum	LEPTOSTEMONUM	MACROCARPON L.		NO	NO
MM 10255	RNL 370/NYADOA (CHOKOSI)	2004	Ghana	LESTER-BIRMINGHAM UNIV.	Aubergine	Solanum	LEPTOSTEMONUM	AETHIOPICUM L. GR. GILO		NO	NO
MM 10256	RNL 371/GBOMA (EWE)	2004	Ghana	LESTER-BIRMINGHAM UNIV.	Aubergine	Solanum	LEPTOSTEMONUM	MACROCARPON L.		NO	NO
MM 10257	RNL 372/GBOMA (EWE)	2004	Ghana	LESTER-BIRMINGHAM UNIV.	Aubergine	Solanum	LEPTOSTEMONUM	MACROCARPON L.		NO	NO
MM 10258	RNL 373/GBOMA (EWE)	2004	Ghana	LESTER-BIRMINGHAM UNIV.	Aubergine	Solanum	LEPTOSTEMONUM	MACROCARPON L.		NO	NO
MM 10259	RNL 374/GBOMA (EWE)	2004	Ghana	LESTER-BIRMINGHAM UNIV.	Aubergine	Solanum	LEPTOSTEMONUM	MACROCARPON L.		NO	NO
MM 10260	RNL 375/GBOMA (EWE)	2004	Ghana	LESTER-BIRMINGHAM UNIV.	Aubergine	Solanum	LEPTOSTEMONUM	MACROCARPON L.		NO	NO
MM 10262	RNL 377/NYADOA (TWI)	2004	Ghana	LESTER-BIRMINGHAM UNIV.	Aubergine	Solanum	LEPTOSTEMONUM	AETHIOPICUM L. GR. GILO		NO	NO
MM 10263	RNL 378/NYADOA (TWI)	2004	Ghana	LESTER-BIRMINGHAM UNIV.	Aubergine	Solanum	LEPTOSTEMONUM	AETHIOPICUM L. GR. GILO		NO	NO
MM 10264	RNL 379/NYADOWA (TWI)	2004	Ghana	LESTER-BIRMINGHAM UNIV.	Aubergine	Solanum	LEPTOSTEMONUM	AETHIOPICUM L. GR. GILO		NO	NO
MM 10265	RNL 380/SEBE (GA)	2004	Ghana	LESTER-BIRMINGHAM UNIV.	Aubergine	Solanum	LEPTOSTEMONUM	AETHIOPICUM L. GR. GILO		NO	NO
MM 10268	RNL 383/ATROPO (TWI)	2004	Ghana	LESTER-BIRMINGHAM UNIV.	Aubergine	Solanum		melongena		NO	NO
MM 10270	RNL 385/NTROPO (TWI?)	2004	Ghana	LESTER-BIRMINGHAM UNIV.	Aubergine	Solanum	LEPTOSTEMONUM	MACROCARPON L.		NO	NO
MM 10271	RNL 386	2004	Ghana	LESTER-BIRMINGHAM UNIV.	Aubergine	Solanum	LEPTOSTEMONUM	AETHIOPICUM L. GR. GILO		NO	NO
MM 10272	RNL 387/PONKOMO (TWI?)	2004	Ghana	LESTER-BIRMINGHAM UNIV.	Aubergine	Solanum		melongena		NO	NO
MM 10273	RNL 388/NTROPO (TWI?)	2004	Ghana	LESTER-BIRMINGHAM UNIV.	Aubergine	Solanum	LEPTOSTEMONUM	MACROCARPON L.		NO	NO
MM 10274	RNL 389/NTROPO (TWI?)	2004	Ghana	LESTER-BIRMINGHAM UNIV.	Aubergine	Solanum	LEPTOSTEMONUM	MACROCARPON L.		NO	NO
MM 10275	RNL 390/NTROAA (TWI?)	2004	Ghana	LESTER-BIRMINGHAM UNIV.	Aubergine	Solanum	LEPTOSTEMONUM	AETHIOPICUM L. GR. GILO		NO	NO
MM 10276	RNL 391/PONKOMO (TWI?)	2004	Ghana	LESTER-BIRMINGHAM UNIV.	Aubergine	Solanum		melongena		NO	NO
MM 10277	RNL 392/BITTERBALL (ENGLISH)	2004	Liberia	LESTER-BIRMINGHAM UNIV.	Aubergine	Solanum	LEPTOSTEMONUM	AETHIOPICUM L. GR. GILO		NO	NO
MM 10279	RNL 394/BITTERBALL (ENGLISH)	2004	Liberia	LESTER-BIRMINGHAM UNIV.	Aubergine	Solanum	LEPTOSTEMONUM	AETHIOPICUM L. GR. GILO		NO	NO
MM 10280	RNL 395/BITTERBALL (ENGLISH)	2004	Liberia	LESTER-BIRMINGHAM UNIV.	Aubergine	Solanum	LEPTOSTEMONUM	AETHIOPICUM L. GR. GILO		NO	NO
MM 10282	RNL 397/BITTERBALL (ENGLISH)	2004	Liberia	LESTER-BIRMINGHAM UNIV.	Aubergine	Solanum	LEPTOSTEMONUM	AETHIOPICUM L. GR. GILO		NO	NO
MM 10283	RNL 398/BITTERBALL (ENGLISH)	2004	Liberia	LESTER-BIRMINGHAM UNIV.	Aubergine	Solanum	LEPTOSTEMONUM	AETHIOPICUM L. GR. GILO		NO	NO
MM 10285	RNL 400/BITTERBALL (ENGLISH)	2004	Liberia	LESTER-BIRMINGHAM UNIV.	Aubergine	Solanum	LEPTOSTEMONUM	AETHIOPICUM L. GR. GILO		NO	NO
MM 10286	RNL 401/BITTERBALL (ENGLISH)	2004	Liberia	LESTER-BIRMINGHAM UNIV.	Aubergine	Solanum	LEPTOSTEMONUM	AETHIOPICUM L. GR. GILO		NO	NO
MM 10287	RNL 402/BITTERBALL (ENGLISH)	2004	Liberia	LESTER-BIRMINGHAM UNIV.	Aubergine	Solanum	LEPTOSTEMONUM	AETHIOPICUM L. GR. GILO		NO	NO
MM 10296	RNL 411	2004	Nigeria	LESTER-BIRMINGHAM UNIV.	Aubergine	Solanum	LEPTOSTEMONUM	MACROCARPON L.		NO	NO
MM 10297	RNL 412	2004	Nigeria	LESTER-BIRMINGHAM UNIV.	Aubergine	Solanum		melongena		NO	NO
MM 10298	RNL 413	2004	Nigeria	LESTER-BIRMINGHAM UNIV.	Aubergine	Solanum	LEPTOSTEMONUM	AETHIOPICUM L. GR. GILO		NO	NO
MM 10302	RNL 417	2004	Nigeria	LESTER-BIRMINGHAM UNIV.	Aubergine	Solanum	LEPTOSTEMONUM	AETHIOPICUM L. GR. GILO		NO	NO
MM 10302 BIS	RNL 417 BIS	2004	Nigeria	LESTER-BIRMINGHAM UNIV.	Aubergine	Solanum	LEPTOSTEMONUM	AETHIOPICUM L. GR. GILO		NO	NO
MM 10304	RNL 419	2004	Nigeria	LESTER-BIRMINGHAM UNIV.	Aubergine	Solanum	LEPTOSTEMONUM	AETHIOPICUM L. GR. GILO		NO	NO
MM 10304 BIS	RNL 419 BIS	2004	Nigeria	LESTER-BIRMINGHAM UNIV.	Aubergine	Solanum	LEPTOSTEMONUM	AETHIOPICUM L. GR. GILO		NO	NO
MM 10312	RNL 427	2004	Nigeria	LESTER-BIRMINGHAM UNIV.	Aubergine	Solanum	LEPTOSTEMONUM	AETHIOPICUM L. GR. GILO		NO	NO
MM 10313	RNL 428	2004	Nigeria	LESTER-BIRMINGHAM UNIV.	Aubergine	Solanum	LEPTOSTEMONUM	AETHIOPICUM L. GR. GILO		NO	NO
MM 10314	RNL 429	2004	Nigeria	LESTER-BIRMINGHAM UNIV.	Aubergine	Solanum	LEPTOSTEMONUM	AETHIOPICUM L. GR. GILO		NO	NO
MM 10315	RNL 430	2004	Nigeria	LESTER-BIRMINGHAM UNIV.	Aubergine	Solanum	LEPTOSTEMONUM	AETHIOPICUM L. GR. GILO-KUMBA		NO	NO
MM 10322	RNL 437	2004	Nigeria	LESTER-BIRMINGHAM UNIV.	Aubergine	Solanum	LEPTOSTEMONUM	AETHIOPICUM L. GR. GILO-SHUM		NO	NO
MM 10323	RNL 439	2004	Nigeria	LESTER-BIRMINGHAM UNIV.	Aubergine	Solanum	LEPTOSTEMONUM	AETHIOPICUM L. GR. GILO		NO	NO
MM 10324	RNL 440	2004	Nigeria	LESTER-BIRMINGHAM UNIV.	Aubergine	Solanum	LEPTOSTEMONUM	AETHIOPICUM L. GR. GILO-SHUM		NO	NO
MM 10327	RNL 443	2004	Nigeria	LESTER-BIRMINGHAM UNIV.	Aubergine	Solanum	LEPTOSTEMONUM	AETHIOPICUM L. GR. GILO		NO	NO
MM 10330	RNL 446	2004	Nigeria	LESTER-BIRMINGHAM UNIV.	Aubergine			A DETERMINER		NO	NO
MM 10331	RNL 447	2004	Nigeria	LESTER-BIRMINGHAM UNIV.	Aubergine	Solanum	LEPTOSTEMONUM	AETHIOPICUM L. GR. GILO		NO	NO
MM 10332	RNL 448	2004	Nigeria	LESTER-BIRMINGHAM UNIV.	Aubergine	Solanum	LEPTOSTEMONUM	AETHIOPICUM L. GR. GILO		NO	NO
MM 10332 BIS	RNL 448 BIS	2004	Nigeria	LESTER-BIRMINGHAM UNIV.	Aubergine	Solanum	LEPTOSTEMONUM	AETHIOPICUM L. GR. GILO		NO	NO
MM 10332 TER	RNL 448 TER	2004	Nigeria	LESTER-BIRMINGHAM UNIV.	Aubergine	Solanum	LEPTOSTEMONUM	AETHIOPICUM L. GR. GILO		NO	NO
MM 10334	RNL 450	2004	Nigeria	LESTER-BIRMINGHAM UNIV.	Aubergine	Solanum		melongena		NO	NO
MM 10335	RNL 451	2004	Nigeria	LESTER-BIRMINGHAM UNIV.	Aubergine	Solanum		melongena		NO	NO
MM 10337	RNL 453	2004	Nigeria	LESTER-BIRMINGHAM UNIV.	Aubergine	Solanum	LEPTOSTEMONUM	AETHIOPICUM L. GR. GILO-KUMBA		NO	NO
MM 10339	RNL 456	2004	Nigeria	LESTER-BIRMINGHAM UNIV.	Aubergine	Solanum	LEPTOSTEMONUM	AETHIOPICUM L. GR. GILO-KUMBA		NO	YES
MM 10341	RNL 458	2004	Nigeria	LESTER-BIRMINGHAM UNIV.	Aubergine	Solanum	SOLANUM	SCABRUM MILL.	Wild	NO	NO
MM 10342	RNL 459	2004	Nigeria	LESTER-BIRMINGHAM UNIV.	Aubergine	Solanum	LEPTOSTEMONUM	AETHIOPICUM L. GR. GILO		NO	NO
MM 10343	RNL 460	2004	Nigeria	LESTER-BIRMINGHAM UNIV.	Aubergine	Solanum	LEPTOSTEMONUM	AETHIOPICUM L. GR. GILO		NO	NO
MM 10344	RNL 461	2004	Nigeria	LESTER-BIRMINGHAM UNIV.	Aubergine	Solanum		melongena		NO	NO
MM 10345	RNL 462	2004	Nigeria	LESTER-BIRMINGHAM UNIV.	Aubergine	Solanum		melongena		NO	NO
MM 10346	RNL 463	2004	Nigeria	LESTER-BIRMINGHAM UNIV.	Aubergine	Solanum	LEPTOSTEMONUM	AETHIOPICUM L. GR. GILO		NO	NO
MM 10347	RNL 465	2004	Nigeria	LESTER-BIRMINGHAM UNIV.	Aubergine	Solanum	LEPTOSTEMONUM	AETHIOPICUM L. GR. GILO		NO	NO
MM 10351	RNL 470	2004	Nigeria	LESTER-BIRMINGHAM UNIV.	Aubergine	Solanum	LEPTOSTEMONUM	MACROCARPON L.		NO	NO
MM 10353	RNL 472	2004	Nigeria	LESTER-BIRMINGHAM UNIV.	Aubergine	Solanum	LEPTOSTEMONUM	TORVUM SW.	Wild	NO	NO
MM 10416	RNL 541/BASHI	2004	Maldives	LESTER-BIRMINGHAM UNIV.	Aubergine	Solanum		melongena		NO	NO
MM 10417	RNL 542/BASHI	2004	Maldives	LESTER-BIRMINGHAM UNIV.	Aubergine	Solanum		melongena		NO	NO
MM 10418	RNL 543/BASHI	2004	Maldives	LESTER-BIRMINGHAM UNIV.	Aubergine	Solanum		melongena		NO	NO
MM 10419	RNL 544/BASHI	2004	Maldives	LESTER-BIRMINGHAM UNIV.	Aubergine	Solanum		melongena		NO	NO
MM 10420	RNL 545/BASHI	2004	Maldives	LESTER-BIRMINGHAM UNIV.	Aubergine	Solanum		melongena		NO	NO
MM 10421	RNL 546/BASHI	2004	Maldives	LESTER-BIRMINGHAM UNIV.	Aubergine	Solanum		melongena		NO	NO
MM 10422	RNL 547/BASHI	2004	Maldives	LESTER-BIRMINGHAM UNIV.	Aubergine	Solanum		melongena		NO	NO
MM 10423	RNL 548/BASHI	2004	Maldives	LESTER-BIRMINGHAM UNIV.	Aubergine	Solanum		melongena		NO	NO
MM 10424	RNL 549/BASHI	2004	Maldives	LESTER-BIRMINGHAM UNIV.	Aubergine	Solanum		melongena		NO	NO
MM 10425	RNL 550/BASHI	2004	Maldives	LESTER-BIRMINGHAM UNIV.	Aubergine	Solanum		melongena		NO	NO
MM 10426	RNL 551/BASHI	2004	Maldives	LESTER-BIRMINGHAM UNIV.	Aubergine	Solanum		melongena		NO	NO
MM 10427	RNL 552/BASHI	2004	Maldives	LESTER-BIRMINGHAM UNIV.	Aubergine	Solanum		melongena		NO	NO
MM 10428	RNL 553/BASHI	2004	Maldives	LESTER-BIRMINGHAM UNIV.	Aubergine	Solanum		melongena		NO	NO
MM 10429	RNL 554/BASHI	2004	Maldives	LESTER-BIRMINGHAM UNIV.	Aubergine	Solanum		melongena		NO	NO
MM 10430	RNL 555/BASHI	2004	Maldives	LESTER-BIRMINGHAM UNIV.	Aubergine	Solanum		melongena		NO	NO
MM 10431	RNL 556/BASHI	2004	Maldives	LESTER-BIRMINGHAM UNIV.	Aubergine	Solanum		melongena		NO	NO
MM 10432	RNL 557/BASHI	2004	Maldives	LESTER-BIRMINGHAM UNIV.	Aubergine	Solanum		melongena		NO	NO
MM 10433	RNL 558/BASHI	2004	Maldives	LESTER-BIRMINGHAM UNIV.	Aubergine	Solanum		melongena		NO	NO
MM 10434	RNL 559/BASHI	2004	Maldives	LESTER-BIRMINGHAM UNIV.	Aubergine	Solanum		melongena		NO	NO
MM 10435	RNL 560/BASHI	2004	Maldives	LESTER-BIRMINGHAM UNIV.	Aubergine	Solanum		melongena		NO	NO
MM 10436	RNL 561/BASHI	2004	Maldives	LESTER-BIRMINGHAM UNIV.	Aubergine	Solanum		melongena		NO	NO
MM 10437	RNL 562/BASHI	2004	Maldives	LESTER-BIRMINGHAM UNIV.	Aubergine	Solanum		melongena		NO	NO
MM 10438	RNL 563/BASHI	2004	Maldives	LESTER-BIRMINGHAM UNIV.	Aubergine	Solanum		melongena		NO	NO
MM 10439	RNL 564/BASHI	2004	Maldives	LESTER-BIRMINGHAM UNIV.	Aubergine	Solanum		melongena		NO	NO
MM 10440	RNL 565/BASHI	2004	Maldives	LESTER-BIRMINGHAM UNIV.	Aubergine	Solanum		melongena		NO	NO
MM 10441	RNL 566/BASHI	2004	Maldives	LESTER-BIRMINGHAM UNIV.	Aubergine	Solanum		melongena		NO	NO
MM 10442	RNL 567/BASHI	2004	Maldives	LESTER-BIRMINGHAM UNIV.	Aubergine	Solanum		melongena		NO	NO
MM 10443	RNL 568/BASHI	2004	Maldives	LESTER-BIRMINGHAM UNIV.	Aubergine	Solanum		melongena		NO	NO
MM 10444	RNL 570/INTORE (KIRUNDI)	2004	Burundi	LESTER-BIRMINGHAM UNIV.	Aubergine	Solanum	LEPTOSTEMONUM	AETHIOPICUM L. GR. GILO		NO	NO
MM 10446	RNL 572	2004	Burundi	LESTER-BIRMINGHAM UNIV.	Aubergine	Solanum	LEPTOSTEMONUM	AETHIOPICUM L. GR. GILO		NO	NO
MM 10447	RNL 573/MURANDA (KINYARWANDA)	2004	Democratic Republic of the Congo	LESTER-BIRMINGHAM UNIV.	Aubergine	Solanum	LEPTOSTEMONUM	AETHIOPICUM L. GR. GILO-ANGUIVI		NO	NO
MM 10448	RNL 574	2004	Democratic Republic of the Congo	LESTER-BIRMINGHAM UNIV.	Aubergine	Solanum	LEPTOSTEMONUM	AETHIOPICUM L. GR. GILO		NO	NO
MM 10449	RNL 575	2004	Democratic Republic of the Congo	LESTER-BIRMINGHAM UNIV.	Aubergine	Solanum	LEPTOSTEMONUM	ANGUIVI LAM.	Wild	NO	NO
MM 10450	RNL 576	2004	Democratic Republic of the Congo	LESTER-BIRMINGHAM UNIV.	Aubergine	Solanum	SOLANUM	SCABRUM MILL.	Wild	NO	NO
MM 10451	RNL 577	2004	Syrian Arab Republic	LESTER-BIRMINGHAM UNIV.	Aubergine	Solanum		melongena		NO	NO
MM 10452	RNL 578	2004	Syrian Arab Republic	LESTER-BIRMINGHAM UNIV.	Aubergine	Solanum		melongena		NO	NO
MM 10453	RNL 579	2004	Syrian Arab Republic	LESTER-BIRMINGHAM UNIV.	Aubergine	Solanum		melongena		NO	NO
MM 10454	RNL 580	2004	Syrian Arab Republic	LESTER-BIRMINGHAM UNIV.	Aubergine	Solanum		melongena		NO	NO
MM 10455	RNL 581	2004	Syrian Arab Republic	LESTER-BIRMINGHAM UNIV.	Aubergine	Solanum		melongena		NO	NO
MM 10456	RNL 582	2004	Syrian Arab Republic	LESTER-BIRMINGHAM UNIV.	Aubergine	Solanum		melongena		NO	NO
MM 10457	RNL 583	2004	Syrian Arab Republic	LESTER-BIRMINGHAM UNIV.	Aubergine	Solanum		melongena		NO	NO
MM 10458	RNL 584	2004	Syrian Arab Republic	LESTER-BIRMINGHAM UNIV.	Aubergine	Solanum		melongena		NO	NO
MM 10459	RNL 585	2004	Syrian Arab Republic	LESTER-BIRMINGHAM UNIV.	Aubergine	Solanum		melongena		NO	NO
MM 10460	RNL 586	2004	Syrian Arab Republic	LESTER-BIRMINGHAM UNIV.	Aubergine	Solanum		melongena		NO	NO
MM 10462	RNL 588	2004	Syrian Arab Republic	LESTER-BIRMINGHAM UNIV.	Aubergine	Solanum		melongena		NO	NO
MM 10463	RNL 589	2004	Syrian Arab Republic	LESTER-BIRMINGHAM UNIV.	Aubergine	Solanum		melongena		NO	NO
MM 10464	RNL 590/BREDE MARTIN	2004	Mauritius	LESTER-BIRMINGHAM UNIV.	Aubergine	Solanum	SOLANUM	NIGRUM L.	Wild	NO	NO
MM 10465	RNL 591/BRINJELLE CV. CIPAYE NARAIN	2004	Mauritius	LESTER-BIRMINGHAM UNIV.	Aubergine	Solanum		melongena		NO	NO
MM 10466	RNL 592/BRINJELLE ROSITA	2004	Mauritius	LESTER-BIRMINGHAM UNIV.	Aubergine	Solanum		melongena		NO	NO
MM 10467	RNL 593/ATROPO (TWI)	2004	Ghana	LESTER-BIRMINGHAM UNIV.	Aubergine	Solanum	LEPTOSTEMONUM	AETHIOPICUM L. GR. GILO		NO	NO
MM 10469	RNL 595/KODGAKAN (MOBA)	2004	Togo	LESTER-BIRMINGHAM UNIV.	Aubergine	Solanum	LEPTOSTEMONUM	INCANUM L. (GROUPE C)	Wild	NO	NO
MM 11001	BBS 107/SOUDAN-GOJOH (DIOULA),KATJOU (NIANGAFOLO)	2004	Côte d'Ivoire	LESTER-BIRMINGHAM UNIV.	Aubergine	Solanum	LEPTOSTEMONUM	AETHIOPICUM L. GR. KUMBA		NO	NO
MM 11002	BBS 108A/PIE (TAGWANA)	2004	Côte d'Ivoire	LESTER-BIRMINGHAM UNIV.	Aubergine	Solanum	LEPTOSTEMONUM	AETHIOPICUM L. GR. GILO		NO	NO
MM 11003	BBS 109/GOJOH BLANC (DIOULA)	2004	Côte d'Ivoire	LESTER-BIRMINGHAM UNIV.	Aubergine	Solanum	LEPTOSTEMONUM	AETHIOPICUM L. GR. KUMBA		NO	NO
MM 11004	BBS 110A/ZOUO (SAMOGO, MALI)	2004	Côte d'Ivoire	LESTER-BIRMINGHAM UNIV.	Aubergine	Solanum	LEPTOSTEMONUM	AETHIOPICUM L. GR. KUMBA		NO	NO
MM 11005	BBS 111/GOJOH (DIOULA)	2004	Côte d'Ivoire	LESTER-BIRMINGHAM UNIV.	Aubergine	Solanum	LEPTOSTEMONUM	AETHIOPICUM L. GR. KUMBA		NO	NO
MM 11006	BBS 113A/ZOIGO LAH = GROS ZOIGO (SENOUFO)	2004	Côte d'Ivoire	LESTER-BIRMINGHAM UNIV.	Aubergine	Solanum	SOLANUM	SCABRUM MILL.	Wild	NO	NO
MM 11007	BBS 114/DAMESA (SENOUFO)	2004	Côte d'Ivoire	LESTER-BIRMINGHAM UNIV.	Aubergine	Solanum	LEPTOSTEMONUM	AETHIOPICUM L. GR. GILO-ANGUIVI		NO	NO
MM 11008	BBS 116A/DAMESA (PALLAKA, SENOUFO)	2004	Côte d'Ivoire	LESTER-BIRMINGHAM UNIV.	Aubergine	Solanum	LEPTOSTEMONUM	AETHIOPICUM L. GR. SHUM		NO	NO
MM 11009	BBS 117A/KATAKROUE (SENOUFO)	2004	Côte d'Ivoire	LESTER-BIRMINGHAM UNIV.	Aubergine	Solanum	LEPTOSTEMONUM	MACROCARPON L.		NO	NO
MM 11010	BBS 118A/LAGBOGO (SENOUFO)	2004	Côte d'Ivoire	LESTER-BIRMINGHAM UNIV.	Aubergine	Solanum	LEPTOSTEMONUM	AETHIOPICUM L. GR. GILO		NO	NO
MM 11010 BIS	BBS 118B/LAGBOGO (SENOUFO)	2004	Côte d'Ivoire	LESTER-BIRMINGHAM UNIV.	Aubergine	Solanum		melongena		NO	NO
MM 11011	BBS 119/DAMESA (DIOULA)	2004	Côte d'Ivoire	LESTER-BIRMINGHAM UNIV.	Aubergine	Solanum	LEPTOSTEMONUM	ANGUIVI LAM.	Wild	NO	NO
MM 11012	BBS 122/TORO (DIOULA)	2004	Côte d'Ivoire	LESTER-BIRMINGHAM UNIV.	Aubergine	Solanum	LEPTOSTEMONUM	AETHIOPICUM L. GR. GILO		NO	NO
MM 11013	BBS 125B/DAMESA (DIOULA)	2004	Côte d'Ivoire	LESTER-BIRMINGHAM UNIV.	Aubergine	Solanum	LEPTOSTEMONUM	ANGUIVI LAM.	Wild	NO	NO
MM 11014	BBS 126D/DAMESA (DIOULA)	2004	Côte d'Ivoire	LESTER-BIRMINGHAM UNIV.	Aubergine	Solanum	LEPTOSTEMONUM	ANGUIVI LAM.	Wild	NO	NO
MM 11015	BBS 131C/DAMESA (DIOULA)	2004	Côte d'Ivoire	LESTER-BIRMINGHAM UNIV.	Aubergine	Solanum	LEPTOSTEMONUM	ANGUIVI LAM.	Wild	NO	NO
MM 11016	BBS 133A/HIRE (KOULANGO)	2004	Côte d'Ivoire	LESTER-BIRMINGHAM UNIV.	Aubergine	Solanum	LEPTOSTEMONUM	AETHIOPICUM L. GR. GILO		NO	NO
MM 11016 BIS	BBS 133A BIS/HIRE (KOULANGO)	2004	Côte d'Ivoire	LESTER-BIRMINGHAM UNIV.	Aubergine	Solanum	LEPTOSTEMONUM	AETHIOPICUM L. GR. GILO		NO	NO
MM 11017	BBS 134 A/BAKOMI BELA (DIOULA)	2004	Côte d'Ivoire	LESTER-BIRMINGHAM UNIV.	Aubergine	Solanum		melongena		NO	NO
MM 11018	BBS 135D/HIRE (DIOULA)	2004	Côte d'Ivoire	LESTER-BIRMINGHAM UNIV.	Aubergine	Solanum	LEPTOSTEMONUM	AETHIOPICUM L. GR. GILO		NO	NO
MM 11019	BBS 136A	2004	Côte d'Ivoire	LESTER-BIRMINGHAM UNIV.	Aubergine	Solanum	LEPTOSTEMONUM	AETHIOPICUM L. GR. GILO		NO	NO
MM 11020	BBS 137A/SOAGOMAN (KOULANGO)	2004	Côte d'Ivoire	LESTER-BIRMINGHAM UNIV.	Aubergine	Solanum	LEPTOSTEMONUM	AETHIOPICUM L. GR. GILO		NO	NO
MM 11021	BBS 139B/HIRE VONGO = WHITE HIRE (KOULANGO)	2004	Côte d'Ivoire	LESTER-BIRMINGHAM UNIV.	Aubergine	Solanum	LEPTOSTEMONUM	AETHIOPICUM L. GR. GILO		NO	NO
MM 11022	BBS 140B/FOBA (KOULANGO)	2004	Côte d'Ivoire	LESTER-BIRMINGHAM UNIV.	Aubergine	Solanum	LEPTOSTEMONUM	AETHIOPICUM L. GR. GILO		NO	NO
MM 11023	BBS 141A/HIRE BIKO, HIRE VONGO (KOULANGO)	2004	Côte d'Ivoire	LESTER-BIRMINGHAM UNIV.	Aubergine	Solanum	LEPTOSTEMONUM	AETHIOPICUM L. GR. GILO		NO	NO
MM 11024	BBS 142A/SOAGOMAN (KOULANGO)	2004	Côte d'Ivoire	LESTER-BIRMINGHAM UNIV.	Aubergine	Solanum	LEPTOSTEMONUM	AETHIOPICUM L. GR. GILO		NO	NO
MM 11026	BBS 144C/HIRE BIKO (KOULANGO)	2004	Côte d'Ivoire	LESTER-BIRMINGHAM UNIV.	Aubergine	Solanum	LEPTOSTEMONUM	AETHIOPICUM L. GR. GILO		NO	NO
MM 11027	BBS 146 A/TORO BAH = BIG TORO (DIOULA)	2004	Côte d'Ivoire	LESTER-BIRMINGHAM UNIV.	Aubergine	Solanum		melongena		NO	NO
MM 11028	BBS 147G/TORO MISE = SMALL TORO, SOROUIA (DIOULA)	2004	Côte d'Ivoire	LESTER-BIRMINGHAM UNIV.	Aubergine	Solanum	LEPTOSTEMONUM	AETHIOPICUM L. GR. GILO		NO	NO
MM 11029	BBS 148D/TORO MISE = SMALL TORO, SOROUIA (DIOULA)	2004	Côte d'Ivoire	LESTER-BIRMINGHAM UNIV.	Aubergine	Solanum	LEPTOSTEMONUM	ANGUIVI LAM.	Wild	NO	NO
MM 11030	BBS 150C/TORO (DIOULA)	2006	Côte d'Ivoire	LESTER-BIRMINGHAM UNIV.	Aubergine	Solanum	LEPTOSTEMONUM	AETHIOPICUM L. GR. GILO		NO	NO
MM 11031	BBS 151A/TORO (DIOULA)	2004	Côte d'Ivoire	LESTER-BIRMINGHAM UNIV.	Aubergine	Solanum	LEPTOSTEMONUM	AETHIOPICUM L. GR. GILO		NO	NO
MM 11032	BBS 157A/TORO (DIOULA)	2004	Côte d'Ivoire	LESTER-BIRMINGHAM UNIV.	Aubergine	Solanum	LEPTOSTEMONUM	AETHIOPICUM L. GR. GILO		NO	NO
MM 11034	BBS 159B/KOUMBA (MOSSI, U. VOLTA)	2004	Côte d'Ivoire	LESTER-BIRMINGHAM UNIV.	Aubergine	Solanum	LEPTOSTEMONUM	AETHIOPICUM L. GR. GILO		NO	NO
MM 11036	BBS 168A/AOROGBO (AGNI)	2004	Côte d'Ivoire	LESTER-BIRMINGHAM UNIV.	Aubergine	Solanum	LEPTOSTEMONUM	MACROCARPON L.		NO	NO
MM 11037	BBS 170A/GNANGNAN (AGNI)	2004	Côte d'Ivoire	LESTER-BIRMINGHAM UNIV.	Aubergine	Solanum	LEPTOSTEMONUM	AETHIOPICUM L. GR. GILO-ANGUIVI		NO	NO
MM 11038	BBS 171B/TORAGBO (AGNI)	2004	Côte d'Ivoire	LESTER-BIRMINGHAM UNIV.	Aubergine	Solanum	LEPTOSTEMONUM	MACROCARPON L.		NO	NO
MM 11039	BBS 172C/GNEGNEPI (AGNI)	2004	Côte d'Ivoire	LESTER-BIRMINGHAM UNIV.	Aubergine	Solanum	LEPTOSTEMONUM	AETHIOPICUM L. GR. GILO-ANGUIVI		NO	NO
MM 11040	BBS 173A/N'DROWA (AGNI)	2004	Côte d'Ivoire	LESTER-BIRMINGHAM UNIV.	Aubergine	Solanum	LEPTOSTEMONUM	AETHIOPICUM L. GR. GILO		NO	NO
MM 11041	BBS 175 A/TOROGBO (AGNI)	2004	Côte d'Ivoire	LESTER-BIRMINGHAM UNIV.	Aubergine	Solanum		melongena		NO	NO
MM 11042	BBS 176 A/TOROGBO DJAN = LONG TOROGBO (AGNI)	2004	Côte d'Ivoire	LESTER-BIRMINGHAM UNIV.	Aubergine	Solanum		melongena		NO	NO
MM 11043	BBS 177 A/TOROGBO (AGNI)	2004	Côte d'Ivoire	LESTER-BIRMINGHAM UNIV.	Aubergine	Solanum		melongena		NO	NO
MM 11044	BBS 178A/TOROGBO (AGNI)	2004	Côte d'Ivoire	LESTER-BIRMINGHAM UNIV.	Aubergine	Solanum	LEPTOSTEMONUM	MACROCARPON L.		NO	NO
MM 11045	BBS 179A/TOROGBO (AGNI)	2004	Côte d'Ivoire	LESTER-BIRMINGHAM UNIV.	Aubergine	Solanum	LEPTOSTEMONUM	MACROCARPON L.		NO	NO
MM 11046	BBS 180A/NZERUIA = COLORE PAR LE SOLEIL (AGNI)	2004	Côte d'Ivoire	LESTER-BIRMINGHAM UNIV.	Aubergine	Solanum	LEPTOSTEMONUM	AETHIOPICUM L. GR. GILO-ANGUIVI		NO	NO
MM 11047	BBS 181A/N'DROWA (AGNI)	2004	Côte d'Ivoire	LESTER-BIRMINGHAM UNIV.	Aubergine	Solanum	LEPTOSTEMONUM	AETHIOPICUM L. GR. GILO-KUMBA		NO	NO
MM 11048	BBS 182A/OHOUO BENDE (AGNI)	2004	Côte d'Ivoire	LESTER-BIRMINGHAM UNIV.	Aubergine	Solanum	LEPTOSTEMONUM	AETHIOPICUM L. GR. GILO		NO	NO
MM 11049	BBS 183A/N'DROWA (AGNI)	2004	Côte d'Ivoire	LESTER-BIRMINGHAM UNIV.	Aubergine	Solanum	LEPTOSTEMONUM	AETHIOPICUM L. GR. GILO		NO	NO
MM 11050	BBS 184A/GNANGNAN (AGNI)	2004	Côte d'Ivoire	LESTER-BIRMINGHAM UNIV.	Aubergine	Solanum	LEPTOSTEMONUM	AETHIOPICUM L. GR. GILO-ANGUIVI		NO	NO
MM 11051	BBS 185A/N'DROWA (AGNI)	2004	Côte d'Ivoire	LESTER-BIRMINGHAM UNIV.	Aubergine	Solanum	LEPTOSTEMONUM	AETHIOPICUM L. GR. GILO		NO	NO
MM 11052	BBS 186/MOMOSOPI (AKIE)	2004	Côte d'Ivoire	LESTER-BIRMINGHAM UNIV.	Aubergine	Solanum		melongena		NO	NO
MM 11054	BBS 188A/MOMOSOPI (AKIE)	2004	Côte d'Ivoire	LESTER-BIRMINGHAM UNIV.	Aubergine	Solanum	LEPTOSTEMONUM	MACROCARPON L.		NO	NO
MM 11055	BBS 189 A/MOMOSOPI (AKIE)	2004	Côte d'Ivoire	LESTER-BIRMINGHAM UNIV.	Aubergine	Solanum		melongena		NO	NO
MM 11056	BBS 190 B/MOMOSOPI (AKIE)	2004	Côte d'Ivoire	LESTER-BIRMINGHAM UNIV.	Aubergine	Solanum		melongena		NO	NO
MM 11057	BBS 191 C/MOMOSOPI (AKIE)	2004	Côte d'Ivoire	LESTER-BIRMINGHAM UNIV.	Aubergine	Solanum		melongena		NO	NO
MM 11058	BBS 192E/KOLONGBO (AGNI)	2004	Côte d'Ivoire	LESTER-BIRMINGHAM UNIV.	Aubergine	Solanum	LEPTOSTEMONUM	AETHIOPICUM L. GR. GILO-ANGUIVI		NO	NO
MM 11062	BBS 196A/BAKOUMA (BAOULE)	2004	Côte d'Ivoire	LESTER-BIRMINGHAM UNIV.	Aubergine	Solanum	LEPTOSTEMONUM	MACROCARPON L.		NO	NO
MM 11087	BBS 222J/TALE (BETE)	2004	Côte d'Ivoire	LESTER-BIRMINGHAM UNIV.	Aubergine	Solanum	LEPTOSTEMONUM	AETHIOPICUM L. GR. GILO-ANGUIVI		NO	NO
MM 12002	BIRM/S.0046	2004	UNKNOWN	LESTER-BIRMINGHAM UNIV.	Aubergine	Solanum		melongena		NO	NO
MM 12003	BIRM/S.0101	2004	UNKNOWN	LESTER-BIRMINGHAM UNIV.	Aubergine	Solanum	LEPTOSTEMONUM	LINNAEANUM HEPPER & JAEGER	Wild	NO	NO
MM 12003 BIS	BIRM/S.0101	2004	UNKNOWN	LESTER BIRMINGHAM UNIV.	Aubergine	Solanum	LEPTOSTEMONUM	LINNAEANUM HEPPER & JAEGER	Wild	NO	NO
MM 12004	BIRM/S.0128	2004	UNKNOWN	LESTER-BIRMINGHAM UNIV.	Aubergine	Solanum	LEPTOSTEMONUM	MARGINATUM L. FIL.	Wild	NO	NO
MM 12009	BIRM/S.0156	2004	UNKNOWN	LESTER-BIRMINGHAM UNIV.	Aubergine	Solanum	LEPTOSTEMONUM	AETHIOPICUM L. GR. GILO		NO	NO
MM 12010	BIRM/S.0225	2004	UNKNOWN	LESTER-BIRMINGHAM UNIV.	Aubergine	Solanum	LEPTOSTEMONUM	AETHIOPICUM L. GR. GILO		NO	NO
MM 12011	BIRM/S.0241	2004	UNKNOWN	LESTER-BIRMINGHAM UNIV.	Aubergine	Solanum		melongena		NO	NO
MM 12012	BIRM/S.0270	2004	UNKNOWN	LESTER-BIRMINGHAM UNIV.	Aubergine	Solanum	LEPTOSTEMONUM	AETHIOPICUM L. GR. GILO		NO	NO
[truncated: 389 more rows]

## Sheet: PEPPER
Accession code	Name	Introduction year	Origin country	Donor	Taxon	Genus	Species	Biological status	National collection	Network collection
PM00001	GROSSE DOUCE	1961	Greece	Unknown	Pepper	Capsicum	annuum		YES	YES
PM00002	SALONIQUE	1961	Greece	Unknown	Pepper	Capsicum	annuum		NO	NO
PM00005	DOLCE DI BERGAMO	1962	Italy	Unknown	Pepper	Capsicum	annuum		NO	YES
PM00006	CORNO DI TORO	1962	Italy	Unknown	Pepper	Capsicum	annuum		NO	NO
PM00008	GIALLO DOLCE DI NOCERA	1962	Italy	Unknown	Pepper	Capsicum	annuum		NO	YES
PM00009	ROSSO DI SPAGNA	1962	Italy	Unknown	Pepper	Capsicum	annuum		NO	YES
PM00011	ROSSO QUADRATO D'ASTI	1962	Italy	Unknown	Pepper	Capsicum	annuum		NO	NO
PM00013	QUADRATO GIALLO D'ASTI	1962	Italy	Unknown	Pepper	Capsicum	annuum		NO	YES
PM00014	JAUNE DE PIGNEROL	1960	Italy	INRAE	Pepper	Capsicum	annuum		YES	YES
PM00018	PI188478 Uvilla Grande	1969	Mexico	Unknown	Pepper	Capsicum	chinense		NO	YES
PM00019	ENOMI BLANC	1962	Japan	Institute of Agriculture and Forestry, University of Tsukuba	Pepper	Capsicum	annuum		NO	YES
PM00020	FUSHIMI AMA	1962	Japan	Institute of Agriculture and Forestry, University of Tsukuba	Pepper	Capsicum	annuum		NO	YES
PM00021	OJISHI	1962	Japan	Institute of Agriculture and Forestry, University of Tsukuba	Pepper	Capsicum	annuum		NO	NO
PM00022	TAKANOTSUME	1962	Japan	Institute of Agriculture and Forestry, University of Tsukuba	Pepper	Capsicum	annuum		NO	YES
PM00023	YATSUBUSA	1962	Japan	Institute of Agriculture and Forestry, University of Tsukuba	Pepper	Capsicum	annuum		NO	YES
PM00024	PIMENT SUCETTE	1961	France	Unknown	Pepper	Capsicum	annuum		YES	YES
PM00028	GROS DUR	1962	France	Unknown	Pepper	Capsicum	annuum		YES	YES
PM00029	DOUX D'ESPAGNE TYPE 2	unknown	Spain	Unknown	Pepper	Capsicum	annuum		YES	YES
PM00030	CARRE D'Italie	1962	Italy	Private individual	Pepper	Capsicum	annuum		NO	YES
PM00031	YOLO WONDER	1962	United States of America	USDA	Pepper	Capsicum	annuum		YES	YES
PM00032	ANTIBOIS	1960	France	Private individual	Pepper	Capsicum	annuum		YES	YES
PM00034	JAUNE SUCETTE HYEROIS	1961	France	Private individual	Pepper	Capsicum	annuum		YES	YES
PM00035	GROS CARRE JAUNE	1962	France	Private individual	Pepper	Capsicum	annuum		YES	YES
PM00037	PIMENT SUCETTE	1962	France	Private individual	Pepper	Capsicum	annuum		NO	YES
PM00038	CERISE	1962	France	Unknown	Pepper	Capsicum	annuum		YES	YES
PM00039	PIMENT DU CHILI	1962	France	BLAIN (BFA)	Pepper	Capsicum	annuum		NO	YES
PM00044	PIMENT DE CAYENNE érigé	1963	France	Vilmorin ( Limagrain Hm-Clause)	Pepper	Capsicum	annuum		YES	YES
PM00045	PIMENT DE CAYENNE	1962	France	Private individual	Pepper	Capsicum	annuum		YES	YES
PM00050	BRULANT D'ESPAGNE ROSE	1962	Spain	I M B	Pepper	Capsicum	annuum		NO	YES
PM00053	PIQUANT D'ALGERIE 2	1960	Algeria	Vilmorin ( Limagrain Hm-Clause)	Pepper	Capsicum	annuum		YES	YES
PM00057	DOUX D'ALGER	1960	Algeria	Vilmorin ( Limagrain Hm-Clause)	Pepper	Capsicum	annuum		YES	YES
PM00065	DOUX D'ESPAGNE TYPE 1	1959	Spain	Vilmorin ( Limagrain Hm-Clause)	Pepper	Capsicum	annuum		YES	YES
PM00069	DOUX D'ESPAGNE LONG	1962	Spain	BLAIN (BFA)	Pepper	Capsicum	annuum		NO	NO
PM00076	DOUX LONG DES LANDES (DLL)	1962	France	Vilmorin ( Limagrain Hm-Clause)	Pepper	Capsicum	annuum		YES	YES
PM00080	ROUGE LONG ORDINAIRE	1962	France	BLAIN (BFA)	Pepper	Capsicum	annuum		YES	YES
PM00089	GROS DUR	1959	France	Tezier	Pepper	Capsicum	annuum		YES	YES
PM00092	GROS CARRE DOUX	1962	France	Private individual	Pepper	Capsicum	annuum		YES	YES
PM00093	GROS CARRE DOUX	1962	France	CAYEUX	Pepper	Capsicum	annuum		YES	YES
PM00096	CARRE DOUX D'AMERIQUE	1962	France	BLAIN (BFA)	Pepper	Capsicum	annuum		NO	YES
PM00099	CADOU	1962	France	Private individual	Pepper	Capsicum	annuum		NO	NO
PM00102	RUBY KING 1	1969	France	Vilmorin ( Limagrain Hm-Clause)	Pepper	Capsicum	annuum		NO	YES
PM00103	RUBY KING 2	1962	France	Vilmorin ( Limagrain Hm-Clause)	Pepper	Capsicum	annuum		NO	YES
PM00107	MUSEAU DE BŒUF	1962	France	BLAIN (BFA)	Pepper	Capsicum	annuum		YES	YES
PM00110	GEANT DE CHINE	1962	France	BLAIN (BFA)	Pepper	Capsicum	annuum		YES	YES
PM00118	DOUX AURORE	1962	France	Vilmorin ( Limagrain Hm-Clause)	Pepper	Capsicum	annuum		YES	YES
PM00126	AMARILLO LISO	1962	Spain	Unknown	Pepper	Capsicum	annuum		NO	YES
PM00127	LISO	1962	Spain	Unknown	Pepper	Capsicum	annuum		NO	YES
PM00128	QUADRANGULAR CORTO	1962	Spain	Unknown	Pepper	Capsicum	annuum		NO	YES
PM00130	CESKA RANA	1962	Czechia	OLOMOUC Research Institute of VegetablesTCHECOSLOVAQUIE	Pepper	Capsicum	annuum		NO	YES
PM00132	SEVERKA	1962	Czechia	OLOMOUC Research Institute of VegetablesTCHECOSLOVAQUIE	Pepper	Capsicum	annuum		NO	NO
PM00135	CALWONDER	1962	United States of America	USDA	Pepper	Capsicum	annuum		NO	NO
PM00136	FLORIDA GIANT	1962	United States of America	USDA	Pepper	Capsicum	annuum		NO	YES
PM00137	ALLBIG	1962	United States of America	USDA	Pepper	Capsicum	annuum		NO	NO
PM00139	OALAVIEW WONDER	1962	United States of America	USDA	Pepper	Capsicum	annuum		NO	YES
PM00140	PERFECTION 1	1962	Spain	USDA	Pepper	Capsicum	annuum		NO	YES
PM00141	WORLD BEATER	1962	United States of America	USDA	Pepper	Capsicum	annuum		NO	NO
PM00145	PLAT ROUGE	1962	Italy	SARV	Pepper	Capsicum	annuum		YES	YES
PM00147	LONG JAUNE	1962	Italy	SARV	Pepper	Capsicum	annuum		NO	YES
PM00148	NIORA 1	1962	Spain	INRAE	Pepper	Capsicum	annuum		NO	YES
PM00150	TOZEUR	1962	Tunisia	INRAE	Pepper	Capsicum	annuum		NO	YES
PM00152	PIMENT SUCETTE	1963	France	Private individual	Pepper	Capsicum	annuum		NO	NO
PM00153	TABASCO	1963	Unknown	INRAE	Pepper	Capsicum	frutescens		NO	YES
PM00155	HUNGARIAN YELLOW WAX SWEET	1963	Hungary	PETO SEED	Pepper	Capsicum	annuum		NO	YES
PM00156	CHERRY SWEET	1963	United States of America	PETO SEED	Pepper	Capsicum	annuum		NO	YES
PM00157	EARLY CALWONDER	1963	United States of America	PETO SEED	Pepper	Capsicum	annuum		NO	NO
PM00159	VINEDALE	1963	United States of America	PETO SEED	Pepper	Capsicum	annuum		NO	YES
PM00160	EARLY WONDER	1963	United States of America	PETO SEED	Pepper	Capsicum	annuum		NO	NO
PM00161	RIO WONDER	1963	United States of America	PETO SEED	Pepper	Capsicum	annuum		NO	YES
PM00162	YOLO Y = YRP10	1963	United States of America	Private individual	Pepper	Capsicum	annuum		YES	YES
PM00174	ROLEY	1963	France	Private individual	Pepper	Capsicum	annuum		NO	YES
PM00175	MEDINA DE CASABLANCA	1963	Morocco	INRAE	Pepper	Capsicum	frutescens		NO	YES
PM00186	LAGNES	1963	France	Private individual	Pepper	Capsicum	annuum		NO	NO
PM00194	LAMU	1963	France	Unknown	Pepper	Capsicum	annuum		NO	NO
PM00195	LAGNES	1963	France	Private individual	Pepper	Capsicum	annuum		NO	NO
PM00200	LAGNES	1963	France	Private individual	Pepper	Capsicum	annuum		NO	NO
PM00205	PIMENT JAUNE ERIGE	1963	Algeria	Private individual	Pepper	Capsicum	annuum		NO	NO
PM00206	ROUGE TOUPIE	1963	Algeria	Private individual	Pepper	Capsicum	annuum		NO	NO
PM00212	PIMENT DOUX (=C. angulosum)	1963	Algeria	Private individual	Pepper	Capsicum	baccatum		NO	YES
PM00216	MALGACHE	1964	Madagascar	INRAE	Pepper	Capsicum	annuum		NO	NO
PM00217	PI201234 PIMENT 493-1	1964	United States of America	University of California DAVIS CALIFORNIE USA	Pepper	Capsicum	annuum		YES	YES
PM00218	GRAIN DE CAFE	1964	Algeria	Private individual	Pepper	Capsicum	annuum		YES	YES
PM00219	SPARTAN EMERALD	1964	United States of America	Department of horticultural Lansing Michigan USA	Pepper	Capsicum	annuum		NO	YES
PM00220	GROSSO ROSSO QUADRATO DI CALIFORNIA	1964	Italy	Private individual	Pepper	Capsicum	annuum		NO	NO
PM00221	PEJO	1964	Italy	Unknown	Pepper	Capsicum	annuum		NO	YES
PM00222	PEPERONE ZORZI	1964	Italy	Private individual	Pepper	Capsicum	annuum		NO	YES
PM00223	PIMIENTO MORRON	1964	Spain	Private individual	Pepper	Capsicum	annuum		NO	YES
PM00224	PEPERONE CALOZI	1964	Italy	Unknown	Pepper	Capsicum	annuum		NO	YES
PM00225	PEPERONE DI LUCCA	1964	Italy	Unknown	Pepper	Capsicum	annuum		NO	YES
PM00226	PIMIENTO BOLLA	1964	Spain	Private individual	Pepper	Capsicum	annuum		NO	YES
PM00235	CHILI ICONO	1964	Spain	Private individual	Pepper	Capsicum	frutescens		NO	YES
PM00236	CERUTTI	1964	Italy	Unknown	Pepper	Capsicum	annuum		NO	YES
PM00237	ELEFANTORMANY	1964	Hungary	Unknown	Pepper	Capsicum	annuum		NO	NO
PM00239	BOGYISZLOI 1	1964	Hungary	Private individual	Pepper	Capsicum	annuum		NO	YES
PM00242	CSARDAS	1964	Hungary	Private individual	Pepper	Capsicum	annuum		NO	YES
PM00245	JAPAN PIROS	1964	Japan	Private individual	Pepper	Capsicum	annuum		NO	YES
PM00246	NENSIEDLER	1964	Bulgaria	Private individual	Pepper	Capsicum	annuum		NO	NO
PM00247	PLOVDIVSKI JUS	1964	Bulgaria	Private individual	Pepper	Capsicum	annuum		NO	YES
PM00248	SIPKA BELAJOR	1964	Bulgaria	Private individual	Pepper	Capsicum	annuum		NO	YES
PM00251	SZEGDI APROCSERESZNIJE	1964	Hungary	Private individual	Pepper	Capsicum	annuum		NO	YES
PM00255	NIORA 2	1964	Spain	Unknown	Pepper	Capsicum	annuum		NO	NO
PM00261	FOROTO-BA	1965	Burkina Faso	IRAT	Pepper	Capsicum	annuum		NO	YES
PM00262	FILO	1965	Burkina Faso	IRAT	Pepper	Capsicum	frutescens		NO	YES
PM00266	FOROTO- 3	1965	Burkina Faso	IRAT	Pepper	Capsicum	frutescens		NO	YES
PM00269	SOUMAN BOUCOULE 1	1965	Burkina Faso	IRAT	Pepper	Capsicum	annuum		NO	YES
PM00270	SOUMAN BOUCOULE 2	1965	Burkina Faso	IRAT	Pepper	Capsicum	annuum		NO	NO
PM00275	MORRON	1965	Spain	INRAE	Pepper	Capsicum	annuum		NO	YES
PM00276	LARGO GRUESO	1965	Spain	INRAE	Pepper	Capsicum	annuum		NO	YES
PM00277	MORRON CONSERVA	1965	Spain	INRAE	Pepper	Capsicum	annuum		NO	NO
PM00278	LARGO DE REUS	1965	Spain	INRAE	Pepper	Capsicum	annuum		YES	YES
PM00279	LARGO VALENCIANO	1965	Spain	INRAE	Pepper	Capsicum	annuum		NO	YES
PM00280	MORRO DE VACA	1965	Spain	INRAE	Pepper	Capsicum	annuum		NO	YES
PM00281	NIKKO	1965	Japan	Institut pour Amélioration des plantes cultivées	Pepper	Capsicum	annuum		NO	NO
PM00283	DARUMA	1965	Japan	Institut pour Amélioration des plantes cultivées	Pepper	Capsicum	annuum		NO	YES
PM00285	TOMATEN-FRUCHTIGER	1965	Italy	Institut pour Amélioration des plantes cultivées	Pepper	Capsicum	annuum		NO	YES
PM00287	SUMENSKI ROTUND	1965	Bulgaria	Institut pour Amélioration des plantes cultivées	Pepper	Capsicum	annuum		NO	YES
PM00288	SPIKA CERNA	1965	Bulgaria	Institut pour Amélioration des plantes cultivées	Pepper	Capsicum	annuum		NO	NO
PM00289	KALINKOV 800/7	1965	Bulgaria	Institut pour Amélioration des plantes cultivées	Pepper	Capsicum	annuum		NO	NO
PM00291	BAJAI FEHER	1965	Czechia	Institut pour Amélioration des plantes cultivées	Pepper	Capsicum	annuum		NO	YES
PM00292	KARDINALSKIJ	1965	Czechia	Institut pour Amélioration des plantes cultivées	Pepper	Capsicum	annuum		NO	NO
PM00295	DO CHUNG PAO	1965	Czechia	Institut pour Amélioration des plantes cultivées	Pepper	Capsicum	annuum		NO	YES
PM00296	BI KE CE	1965	Czechia	Institut pour Amélioration des plantes cultivées	Pepper	Capsicum	annuum		NO	YES
PM00297	NOVOSELSKA KAPIJA	1965	Czechia	Institut pour Amélioration des plantes cultivées	Pepper	Capsicum	annuum		NO	YES
PM00298	ZITAVSKA	1965	Czechia	Institut pour Amélioration des plantes cultivées	Pepper	Capsicum	annuum		NO	YES
PM00299	ARDEI GOGOSAR	1965	Romania	Institut pour Amélioration des plantes cultivées	Pepper	Capsicum	annuum		NO	YES
PM00300	PITELCA	1965	Romania	Institut pour Amélioration des plantes cultivées	Pepper	Capsicum	annuum		NO	YES
PM00302	ARDEI GRAS	1965	Romania	Institut pour Amélioration des plantes cultivées	Pepper	Capsicum	annuum		NO	YES
PM00305	HATVANI	1965	Hungary	Institut pour Amélioration des plantes cultivées	Pepper	Capsicum	annuum		NO	NO
PM00306	VARSZEGI 1	1965	Hungary	Institut pour Amélioration des plantes cultivées	Pepper	Capsicum	annuum		NO	YES
PM00308	SZEGEDI NAGYCSERESZNYE	1965	Hungary	Institut pour Amélioration des plantes cultivées	Pepper	Capsicum	annuum		NO	YES
PM00309	SZEGEDI CSIPOS 48-163	1965	Hungary	Institut pour Amélioration des plantes cultivées	Pepper	Capsicum	annuum		NO	YES
PM00311	TOKODI	1965	Hungary	Institut pour Amélioration des plantes cultivées	Pepper	Capsicum	annuum		NO	YES
PM00313	CECEI CSIPOS	1965	Hungary	Institut pour Amélioration des plantes cultivées	Pepper	Capsicum	annuum		NO	YES
PM00315	KALOKSAI 321	1965	Hungary	Institut pour Amélioration des plantes cultivées	Pepper	Capsicum	annuum		NO	NO
PM00316	TETENYI	1965	Hungary	Institut pour Amélioration des plantes cultivées	Pepper	Capsicum	annuum		NO	YES
PM00317	ROTUNDA A-10	1965	Russian Federation	Institut pour Amélioration des plantes cultivées	Pepper	Capsicum	annuum		NO	YES
PM00318	KUBANSKIJ RANNIJ 70/60	1965	Russian Federation	Institut pour Amélioration des plantes cultivées	Pepper	Capsicum	annuum		NO	YES
PM00319	C.PENDULUM WILD	1965	Russian Federation	Institut pour Amélioration des plantes cultivées	Pepper	Capsicum	baccatum		NO	YES
PM00320	NOVOCERKASSKIJ D35	1965	Russian Federation	Institut pour Amélioration des plantes cultivées	Pepper	Capsicum	annuum		NO	YES
PM00321	ASTRACHANSKIJ A60	1965	Russian Federation	Institut pour Amélioration des plantes cultivées	Pepper	Capsicum	annuum		NO	YES
PM00322	VELIKAN NR-97	1965	Russian Federation	Institut pour Amélioration des plantes cultivées	Pepper	Capsicum	annuum		NO	NO
PM00323	MAIKOP 470	1965	Republic of Moldova	Institut pour Amélioration des plantes cultivées	Pepper	Capsicum	annuum		NO	NO
PM00324	YELLOW OSHKOSH	1965	United States of America	Institut pour Amélioration des plantes cultivées	Pepper	Capsicum	annuum		NO	YES
PM00325	C.PENDULUM WILD	1965	United States of America	Institut pour Amélioration des plantes cultivées	Pepper	Capsicum	baccatum		YES	YES
PM00329	JANOS	1965	Germany	Institut pour Amélioration des plantes cultivées	Pepper	Capsicum	annuum		NO	NO
PM00330	GRAIN DE CAFE 2	1965	Unknown	Institut pour Amélioration des plantes cultivées	Pepper	Capsicum	frutescens		NO	NO
PM00332	WIENER WACHS	1965	Austria	Institut pour Amélioration des plantes cultivées	Pepper	Capsicum	annuum		NO	NO
PM00333	WIENER CALVILL	1965	Austria	Institut pour Amélioration des plantes cultivées	Pepper	Capsicum	annuum		NO	YES
PM00334	MARITZA	1965	Germany	Institut pour Amélioration des plantes cultivées	Pepper	Capsicum	annuum		NO	YES
PM00335	IKOM II	1965	Nigeria	Institut pour Amélioration des plantes cultivées	Pepper	Capsicum	annuum		NO	YES
PM00336	YELLOW NAHARIA	1965	Israel	REHOVOTH ISRAEL	Pepper	Capsicum	annuum		NO	NO
PM00338	GIALLO LONGO DOLCE DI MARCONI	1965	Italy	Private individual	Pepper	Capsicum	annuum		NO	YES
PM00339	GIALLO LONGO DI SPAGNA	1965	Italy	Private individual	Pepper	Capsicum	annuum		NO	YES
PM00340	GIALLO LONGO CORNO DI BUE	1965	Italy	Private individual	Pepper	Capsicum	annuum		NO	YES
PM00342	DE ARAD	1965	Romania	INRAE	Pepper	Capsicum	annuum		NO	YES
PM00343	COLLECTIVIST 1962	1965	Romania	INRAE	Pepper	Capsicum	annuum		NO	YES
PM00345	DE CRAÏOVA	1965	Romania	INRAE	Pepper	Capsicum	annuum		NO	NO
PM00346	MEDAILLE D' OR	1965	Romania	INRAE	Pepper	Capsicum	annuum		NO	YES
PM00347	MARCONI JAUNE	1965	France	Private individual	Pepper	Capsicum	annuum		NO	YES
PM00348	ASTI MERIC	1965	unknown	Unknown	Pepper	Capsicum	annuum		NO	YES
PM00349	JURSIJARA IA	1965	Unknown	INRAE	Pepper	Capsicum	annuum		NO	YES
PM00352	BELA KRUPNA BABURA	1965	Unknown	INRAE	Pepper	Capsicum	annuum		NO	NO
PM00353	SLOVONA SURLA	1965	Unknown	INRAE	Pepper	Capsicum	annuum		NO	YES
PM00354	KURTOVSKA KAPIJA	1965	Bulgaria	INRAE	Pepper	Capsicum	annuum		NO	YES
PM00355	NIGRUM	1965	Unknown	INRAE	Pepper	Capsicum	annuum	WILD	YES	YES
PM00356	TOUPIE	1965	Unknown	INRAE	Pepper	Capsicum	chinense		NO	YES
PM00357	CHI77	1965	Unknown	INRAE	Pepper	Capsicum	chinense		NO	NO
PM00359		1965	Unknown	INRAE	Pepper	Capsicum	frutescens		NO	YES
PM00360	PETIT FRUIT CONIQUE	1966	France	Private individual	Pepper	Capsicum	annuum		YES	YES
PM00363	H 28-17-60	1966	Spain	Ceta	Pepper	Capsicum	annuum		NO	YES
PM00364	VR N° 1005	1966	Bulgaria	Private individual	Pepper	Capsicum	annuum		YES	YES
PM00367	TENDRE DE CHATEAURENARD	1966	France	Private individual	Pepper	Capsicum	annuum		YES	YES
PM00368	JAPONAIS	1967	Japan	JVBA	Pepper	Capsicum	annuum		NO	YES
PM00369	YOUGOSLAVE	1967	Unknown	Private individual	Pepper	Capsicum	annuum		NO	YES
PM00370	DE PUJAUT	1967	France	Private individual	Pepper	Capsicum	annuum		YES	YES
PM00371	ULLU PICA	1967	Bolivia (Plurinational State of)	Unknown	Pepper	Capsicum	cardenasii	WILD	NO	NO
PM00372	BOLIVIE N°1	1967	Bolivia (Plurinational State of)	Unknown	Pepper	Capsicum	baccatum		NO	YES
PM00373	BOLIVIE N°2	1967	Bolivia (Plurinational State of)	Unknown	Pepper	Capsicum	baccatum		NO	YES
PM00374	ROCOTO REG 502	1967	Peru	Research station Molina - Peru	Pepper	Capsicum	pubescens		NO	NO
PM00375	MISHME 623	1967	Peru	Research station Molina - Peru	Pepper	Capsicum	baccatum		NO	YES
PM00376	MISHME 667	1967	Peru	Research station Molina - Peru	Pepper	Capsicum	baccatum		NO	YES
PM00377	MISHME 618	1967	Peru	Research station Molina - Peru	Pepper	Capsicum	baccatum		NO	YES
PM00380	MISHME 622	1967	Peru	Research station Molina - Peru	Pepper	Capsicum	chinense		NO	YES
PM00381	MISHME 615	1967	Peru	Research station Molina - Peru	Pepper	Capsicum	chinense		NO	YES
PM00383	ROCOTO 450	1967	Peru	Research station Molina - Peru	Pepper	Capsicum	pubescens		NO	YES
PM00384	DOUX DE VALENCE	1967	France	Vilmorin ( Limagrain Hm-Clause)	Pepper	Capsicum	annuum		NO	NO
PM00387	LONG GROS	1967	Côte d'Ivoire	FAO station apicole	Pepper	Capsicum	frutescens		NO	YES
PM00390	11 B 14	1967	Turkey	Private individual	Pepper	Capsicum	annuum		NO	YES
PM00391	ANTILLES 1	1968	Unknown	INRAE	Pepper	Capsicum	chinense		NO	NO
PM00392	GROS CARRE DU DANUBE	1968	France	INVUFLEC	Pepper	Capsicum	annuum		NO	YES
PM00394	PORTO CALIN	1968	Romania	INRAE	Pepper	Capsicum	annuum		NO	YES
PM00395	GEANT SUCRE TOMATE	1968	Romania	INRAE	Pepper	Capsicum	annuum		NO	YES
PM00396	GROS CARRE DE ROBION	1968	France	Private individual	Pepper	Capsicum	annuum		YES	YES
PM00397	PIMIENTO 1	1968	United States of America	PETO SEED	Pepper	Capsicum	annuum		NO	YES
PM00398	FRESNO CHILI	1968	United States of America	PETO SEED	Pepper	Capsicum	annuum		NO	YES
PM00400	AJI VERDE PEQUENO	1968	Bolivia (Plurinational State of)	Private individual	Pepper	Capsicum	baccatum		NO	YES
PM00401	ROCOTO	1968	Bolivia (Plurinational State of)	Private individual	Pepper	Capsicum	pubescens		NO	NO
PM00406	RECA OSENA	1968	Netherlands	ENKE DANEMARK	Pepper	Capsicum	annuum		NO	YES
PM00407	PROPA	1968	Netherlands	ENKE DANEMARK	Pepper	Capsicum	annuum		NO	YES
PM00408	VOGHERA VERTE	1968	Netherlands	ENKE DANEMARK	Pepper	Capsicum	annuum		NO	NO
PM00409	IDEAL PRECOCE	1968	Switzerland	ALTOFER SAMEN SUISSE	Pepper	Capsicum	annuum		NO	NO
PM00410	KEYSTONE RESISTANT GIANT	1968	United States of America	KEYSTONE SEED USA	Pepper	Capsicum	annuum		NO	YES
PM00412	DOUX HATIF DE SAINT REMY	1969	France	Gautier	Pepper	Capsicum	annuum		YES	YES
PM00414	AMBATO	1969	Argentina	Unknown	Pepper	Capsicum	annuum		NO	NO
PM00416	SALTENITO	1969	Argentina	Unknown	Pepper	Capsicum	annuum		NO	YES
PM00417	GUADELOUPE	1969	Unknown	INRAE	Pepper	Capsicum	chinense		YES	YES
PM00419	EARLIANA	1969	Netherlands	SLUIS & GROOT	Pepper	Capsicum	annuum		NO	YES
PM00421	CECEI EDES	1969	Hungary	Vegetable Crops Research Institute Budapest HONGRIE	Pepper	Capsicum	annuum		NO	YES
PM00422	KESZTHELYI	1969	Hungary	Vegetable Crops Research Institute Budapest HONGRIE	Pepper	Capsicum	annuum		NO	YES
PM00423	SZENTESI FEHER	1969	Hungary	Vegetable Crops Research Institute Budapest HONGRIE	Pepper	Capsicum	annuum		NO	NO
PM00424	KUPOS	1969	Hungary	Vegetable Crops Research Institute Budapest HONGRIE	Pepper	Capsicum	annuum		NO	YES
PM00425	FERTODI	1969	Hungary	Vegetable Crops Research Institute Budapest HONGRIE	Pepper	Capsicum	annuum		NO	NO
PM00426	PARADISCOM ALAKU ZOLD	1969	Hungary	Vegetable Crops Research Institute Budapest HONGRIE	Pepper	Capsicum	annuum		NO	NO
PM00427	KALOCSAI E15	1969	Hungary	Vegetable Crops Research Institute Budapest HONGRIE	Pepper	Capsicum	annuum		NO	NO
PM00428	SZEGEDI 47-25	1969	Hungary	Vegetable Crops Research Institute Budapest HONGRIE	Pepper	Capsicum	annuum		NO	YES
PM00433	67 GM 1	1969	Hungary	Vegetable Crops Research Institute Budapest HONGRIE	Pepper	Capsicum	annuum		NO	NO
PM00434	66 M 7-1	1969	Hungary	Vegetable Crops Research Institute Budapest HONGRIE	Pepper	Capsicum	annuum		NO	YES
PM00436	AC2176	1969	Hungary	Vegetable Crops Research Institute Budapest HONGRIE	Pepper	Capsicum	annuum		NO	YES
PM00437	67 P M 1-OP	1969	Hungary	Vegetable Crops Research Institute Budapest HONGRIE	Pepper	Capsicum	annuum		NO	YES
PM00438	67 N1	1969	Hungary	Vegetable Crops Research Institute Budapest HONGRIE	Pepper	Capsicum	annuum		NO	NO
PM00439	LIVERPOOL	1969	Hungary	Vegetable Crops Research Institute Budapest HONGRIE	Pepper	Capsicum	annuum		NO	YES
PM00441	C.microcarpum SA 326	1969	Unknown	Vegetable Crops Research Institute Budapest HONGRIE	Pepper	Capsicum	microcarpum	WILD	NO	NO
PM00442	AC 2060	1969	Unknown	Vegetable Crops Research Institute Budapest HONGRIE	Pepper	Capsicum	baccatum		NO	YES
PM00446	AC 2059	1969	Unknown	Vegetable Crops Research Institute Budapest HONGRIE	Pepper	Capsicum	pubescens		NO	YES
PM00448	VINETTE	1969	United States of America	Hort .Rech. Inst. of Cult. Vineland - ONTARIO USA	Pepper	Capsicum	annuum		NO	NO
PM00452	NAILONKA	1969	Unknown	INRAE	Pepper	Capsicum	annuum		NO	NO
PM00453	SIVRIJA	1969	Unknown	INRAE	Pepper	Capsicum	annuum		NO	NO
PM00456	D' ALEXINAT	1969	Unknown	INRAE	Pepper	Capsicum	annuum		NO	YES
PM00457	NOVOSADSKA BELA	1969	Unknown	INRAE	Pepper	Capsicum	annuum		NO	YES
PM00458	CHALOKCHARI	1969	Unknown	INRAE	Pepper	Capsicum	annuum		NO	NO
PM00459	CALIFORNIA WONDER	1969	United States of America	INRAE	Pepper	Capsicum	annuum		NO	NO
PM00460	BELA KAPIJA 1	1969	Unknown	INRAE	Pepper	Capsicum	annuum		NO	YES
PM00461	KALVIL	1969	Unknown	INRAE	Pepper	Capsicum	annuum		NO	NO
PM00464	KALVIL TOMATE	1969	Unknown	INRAE	Pepper	Capsicum	annuum		NO	NO
PM00465	KAPIJA	1969	Bulgaria	INRAE	Pepper	Capsicum	annuum		NO	YES
PM00466	P.G.SMITH 129-1	1970	United States of America	University of California DAVIS CALIFORNIE USA	Pepper	Capsicum	frutescens		NO	YES
PM00473	JADE	1970	United States of America	PETO SEED	Pepper	Capsicum	annuum		NO	YES
PM00474	MALAGACHE 8	1970	United States of America	University of California DAVIS CALIFORNIE USA	Pepper	Capsicum	annuum		NO	YES
PM00477	1979-1	1970	United States of America	University of California DAVIS CALIFORNIE USA	Pepper	Capsicum	annuum	WILD	NO	NO
PM00478	DZULJUNSKA SIPKA	1970	Bulgaria	Institut Genetic AMP	Pepper	Capsicum	annuum		NO	YES
PM00479	BELA KAPIJA 2	1970	Bulgaria	Institut Genetic AMP	Pepper	Capsicum	annuum		NO	YES
PM00481	KALINKOV	1970	Bulgaria	Institut Genetic AMP	Pepper	Capsicum	annuum		NO	NO
PM00485	MERRIMAC WONDER	1971	Portugal	Experimental station OEIRAS - Portugal	Pepper	Capsicum	annuum		NO	YES
PM00486	OAK RIDGE ATOMIC	1971	Portugal	Experimental station OEIRAS - Portugal	Pepper	Capsicum	annuum		NO	YES
PM00487	PERFECTION 2	1971	Portugal	Experimental station OEIRAS - Portugal	Pepper	Capsicum	annuum		NO	YES
PM00488	PIMENTOS DE ALVALADE	1971	Portugal	Experimental station OEIRAS - Portugal	Pepper	Capsicum	annuum		NO	YES
PM00489	QUINTAL DE ALGES	1971	Portugal	Experimental station OEIRAS - Portugal	Pepper	Capsicum	annuum		NO	NO
PM00490	QUINTAL DE ALGES 2	1971	Portugal	Experimental station OEIRAS - Portugal	Pepper	Capsicum	annuum		NO	NO
PM00491	SEQUEIRA MENDES	1971	Portugal	Experimental station OEIRAS - Portugal	Pepper	Capsicum	annuum		NO	YES
PM00492	39/A	1971	Portugal	Experimental station OEIRAS - Portugal	Pepper	Capsicum	annuum		NO	YES
PM00495	AGRONOMICO 8	1971	United States of America	Experimental station OEIRAS - Portugal	Pepper	Capsicum	annuum		YES	NO
PM00497	CŒUR DE BŒUF	1971	Portugal	Experimental station OEIRAS - Portugal	Pepper	Capsicum	annuum		NO	YES
PM00499	CAPSICUM GROSSUM	1971	Portugal	Experimental station OEIRAS - Portugal	Pepper	Capsicum	annuum		NO	YES
PM00506	CASCA DURA	1971	United States of America	INRAE	Pepper	Capsicum	annuum		YES	YES
PM00509	MADAME BASIN CA 71502	1971	Unknown	INRAE	Pepper	Capsicum	chinense		NO	YES
PM00511	VERNOU CA 71504	1971	Unknown	INRAE	Pepper	Capsicum	chinense		YES	YES
PM00517	CACAO OU NEGRESSE CA 70011 (proche Kako-Negwes)	1971	Guadeloupe	INRAE	Pepper	Capsicum	chinense		NO	YES
PM00526	MONTEBELLO CA70 559	1971	Guadeloupe	INRAE	Pepper	Capsicum	annuum		NO	YES
PM00533	MALGACHE JAUNE	1971	Madagascar	University of TURIN ITALIA	Pepper	Capsicum	annuum		NO	YES
PM00534	PETIT ROND	1971	France	Vilmorin ( Limagrain Hm-Clause)	Pepper	Capsicum	annuum		YES	YES
PM00536	CHILLIES CIPAYE	1972	Mauritius	INRAE	Pepper	Capsicum	annuum		NO	YES
PM00537	CHILLIES CHINISE GIANT	1972	Mauritius	INRAE	Pepper	Capsicum	annuum		NO	YES
PM00538	CHILIES DUNPUTH	1972	Mauritius	INRAE	Pepper	Capsicum	annuum		NO	YES
PM00539	P26	1972	Unknown	Private individual	Pepper	Capsicum	annuum		NO	YES
PM00540	AL 12	1972	Unknown	Private individual	Pepper	Capsicum	annuum		NO	NO
PM00544	WIENER CALWILL	1972	Austria	Institut Agrobotanique	Pepper	Capsicum	annuum		NO	NO
PM00545	WIENER WACHS	1972	Austria	Institut Agrobotanique	Pepper	Capsicum	annuum		NO	YES
PM00546	BOGYISZLOÏ	1972	Hungary	Institut Agrobotanique	Pepper	Capsicum	annuum		NO	NO
PM00547	KUPOS	1972	Hungary	Institut Agrobotanique	Pepper	Capsicum	annuum		NO	YES
PM00548	KECSKEMETI KORAI HALVANYZOLD	1972	Hungary	Institut Agrobotanique	Pepper	Capsicum	annuum		NO	NO
PM00549	FEHER ETKEZESI CSIPOS	1972	Hungary	Institut Agrobotanique	Pepper	Capsicum	annuum		NO	YES
PM00553	PARADIC SOMALAKU ZOLD SZENTESI	1972	Hungary	Institut Agrobotanique	Pepper	Capsicum	annuum		NO	YES
PM00555	CECEI EDES 3	1972	Hungary	Institut Agrobotanique	Pepper	Capsicum	annuum		NO	YES
PM00556	KOCSOLAI TF	1972	Hungary	Institut Agrobotanique	Pepper	Capsicum	annuum		NO	NO
PM00557	SOROKSARI	1972	Hungary	Institut Agrobotanique	Pepper	Capsicum	annuum		NO	YES
PM00558	KESZTHELYI FEHER	1972	Hungary	Institut Agrobotanique	Pepper	Capsicum	annuum		NO	YES
PM00559	ALMA PAPRIKA	1972	Hungary	Institut Agrobotanique	Pepper	Capsicum	annuum		NO	YES
PM00560	AJI MR	1972	Peru	Private individual	Pepper	Capsicum	baccatum		NO	YES
PM00561	GOLDEN BELL	1972	United States of America	PETO SEED	Pepper	Capsicum	annuum		NO	NO
PM00566	GIALLO QUADRATO D'ASTI	1973	Italy	INRAE	Pepper	Capsicum	annuum		NO	YES
PM00567	QUADRATO D'ASTI GIALLO	1973	Italy	INRAE	Pepper	Capsicum	annuum		NO	NO
PM00568	QUADRATO D'ASTI ROSSO 2	1973	Italy	INRAE	Pepper	Capsicum	annuum		NO	NO
PM00570	HATVANI	1973	Hungary	Vegetable Crops Research Institute Budapest HONGRIE	Pepper	Capsicum	annuum		NO	YES
PM00571	JAVITOTT CECEI	1973	Hungary	Vegetable Crops Research Institute Budapest HONGRIE	Pepper	Capsicum	annuum		NO	NO
PM00572	CSOKROS CSUNGO	1973	Hungary	Vegetable Crops Research Institute Budapest HONGRIE	Pepper	Capsicum	annuum		NO	YES
PM00573	CSOKROS FELALLO	1973	Hungary	Vegetable Crops Research Institute Budapest HONGRIE	Pepper	Capsicum	annuum		NO	YES
PM00574	CHAD ASSIF ADOM	1973	Israel	Hazera	Pepper	Capsicum	annuum		NO	YES
PM00575	BEN SHEFFER 1	1973	Israel	Hazera	Pepper	Capsicum	annuum		NO	NO
PM00579	UJMAJORI	1973	Hungary	INRAE	Pepper	Capsicum	annuum		NO	YES
PM00580	GEPI CONSERV	1973	Hungary	INRAE	Pepper	Capsicum	annuum		NO	YES
PM00581	DECORATIF HONGRIE 1	1973	Hungary	INRAE	Pepper	Capsicum	annuum		NO	YES
PM00582	DECORATIF HONGRIE 2	1973	Hungary	INRAE	Pepper	Capsicum	annuum		NO	YES
PM00584	DECORATIF HONGRIE 3	1973	Hungary	INRAE	Pepper	Capsicum	annuum		NO	YES
PM00588	IKEDA	1973	Brazil	Vegetable Crops Research Institute Budapest HONGRIE	Pepper	Capsicum	annuum		YES	YES
PM00589	MOURA	1973	Brazil	EMBRAPA	Pepper	Capsicum	annuum		YES	YES
PM00590	PUERTO RICO WONDER	1973	Brazil	EMBRAPA	Pepper	Capsicum	annuum		YES	YES
PM00591	TER	1973	Brazil	EMBRAPA	Pepper	Capsicum	annuum		NO	NO
PM00592	EXI x PRA 20-201	1973	Hungary	Vegetable Crops Research Institute Budapest HONGRIE	Pepper	Capsicum	praetermissum	WILD	NO	NO
PM00593	PKC	1973	Hungary	Vegetable Crops Research Institute Budapest HONGRIE	Pepper	Capsicum	baccatum		NO	YES
PM00595	YOLO WONDER JAUNE	1973	Hungary	Vegetable Crops Research Institute Budapest HONGRIE	Pepper	Capsicum	annuum		NO	NO
PM00596	MORRON CONSERVA	1973	Spain	Private individual	Pepper	Capsicum	annuum		NO	YES
PM00598	KONSERVNI KRUGLII	1973	Republic of Moldova	SMEDEREVSKA PALANSKA YOUGOSLAVIE	Pepper	Capsicum	annuum		NO	YES
PM00599	LASTOCKA	1973	Russian Federation	SMEDEREVSKA PALANSKA YOUGOSLAVIE	Pepper	Capsicum	annuum		NO	YES
PM00600	LP1	1974	United States of America	PETO SEED	Pepper	Capsicum	annuum		YES	YES
PM00601	AGRONOMICO 8	1974	United States of America	PETO SEED	Pepper	Capsicum	annuum		NO	YES
PM00602	AVELAR PI342940	1974	United States of America	PETO SEED	Pepper	Capsicum	annuum		YES	YES
PM00603	AJI CHAY	1974	Cuba	INRAE	Pepper	Capsicum	annuum		NO	YES
PM00604	FLORIDA VR2 (COOK 136)	1978	United States of America	Private individual	Pepper	Capsicum	annuum		YES	YES
PM00606	CHACRAS DE CORIA	1974	Argentina	University of CUYO CHACRAS DE CORIA MENDOZE ARGENTINE	Pepper	Capsicum	annuum		NO	YES
PM00607	GIGANTE PRECOCE	1974	Brazil	EMBRAPA	Pepper	Capsicum	baccatum		NO	YES
PM00608	P 51	1974	France	ETABLISSEMENTS CAILLARD	Pepper	Capsicum	annuum		NO	NO
PM00609	ANCHO ESMERALDA	1974	Mexico	INIA	Pepper	Capsicum	annuum		NO	YES
PM00610	JALAPENO RAYADO	1974	Mexico	INIA	Pepper	Capsicum	annuum		YES	YES
PM00611	MULATO ROQUE	1974	Mexico	INIA	Pepper	Capsicum	annuum		NO	YES
PM00612	PASILLA APASEO	1974	Mexico	INIA	Pepper	Capsicum	annuum		NO	YES
PM00613	PASILLA 73- CHI-15201	1974	Mexico	INIA	Pepper	Capsicum	annuum		NO	YES
PM00614	SERRANO VERA CRUZ S.69	1974	Mexico	INIA	Pepper	Capsicum	annuum	WILD	YES	YES
PM00615	RUMBA	1975	Netherlands	Rijkzwaan	Pepper	Capsicum	annuum		NO	NO
PM00616	BRUPA	1975	Netherlands	INRAE	Pepper	Capsicum	annuum		NO	NO
PM00617	DANUBE	1975	Netherlands	INRAE	Pepper	Capsicum	annuum		NO	NO
PM00618	YOLO B N° 7	1975	France	ETABLISSEMENTS CAILLARD	Pepper	Capsicum	annuum		NO	NO
PM00621	AGRONOMICO 10-G	1975	Brazil	Inst Agronomico do Brazil	Pepper	Capsicum	annuum		NO	YES
PM00622	P11 ( PI264-281) 441	1975	Brazil	Inst Agronomico do Brazil	Pepper	Capsicum	annuum		NO	NO
PM00623	TRUHART LINEA 27 A	1975	Cuba	Private individual	Pepper	Capsicum	annuum		NO	YES
PM00624	ESPANOL GIGANTE LINEA 16	1975	Cuba	Private individual	Pepper	Capsicum	annuum		NO	YES
PM00625	BOUQUET 3	1975	Bulgaria	Enea	Pepper	Capsicum	annuum		NO	YES
PM00626	PI152234	1975	Peru	Unknown	Pepper	Capsicum	baccatum		NO	NO
PM00627	F5 ( C.FRUT.X C. ANNUUM) 3-6-3	1975	Hungary	Vegetable Crops Research Institute Budapest HONGRIE	Pepper	Capsicum	annuum		NO	NO
PM00629	PIMEX 1	1975	Mexico	INRAE	Pepper	Capsicum	annuum		NO	NO
PM00630	PIMEX 2	1975	Mexico	INRAE	Pepper	Capsicum	annuum		NO	NO
PM00631	5-21 KENYA 69	1975	Ethiopia	Private individual	Pepper	Capsicum	annuum		NO	YES
PM00632	H 3 BAKO (F4)	1975	Ethiopia	Private individual	Pepper	Capsicum	annuum		NO	YES
PM00634	DELTANA	1976	Netherlands	Private individual	Pepper	Capsicum	annuum		NO	NO
PM00635	TISANA	1976	Netherlands	Private individual	Pepper	Capsicum	annuum		NO	NO
PM00638	BOGOTA (BOG 2)	1976	Colombia	Department of Agricultural Botany - University of Reading - Whiteknights -	Pepper	Capsicum	galapagoense	WILD	NO	NO
PM00639	CHIAPAS BR 203 70	1976	Mexico	Department of Agricultural Botany - University of Reading - Whiteknights -	Pepper	Capsicum	annuum	WILD	NO	NO
PM00640	SINALOA C 70- 8	1976	Mexico	Department of Agricultural Botany - University of Reading - Whiteknights -	Pepper	Capsicum	annuum var. glabriusculum	WILD	NO	NO
PM00641	TURRIALBA (C81)	1976	Costa Rica	Department of Agricultural Botany - University of Reading - Whiteknights -	Pepper	Capsicum	annuum	WILD	NO	NO
PM00642	MANAGUA CB 10	1976	Nicaragua	Department of Agricultural Botany - University of Reading - Whiteknights -	Pepper	Capsicum	annuum var. glabriusculum	WILD	NO	NO
PM00644	ANTIGUA (390)	1976	Guatemala	Department of Agricultural Botany - University of Reading - Whiteknights -	Pepper	Capsicum	annuum var. glabriusculum	WILD	NO	NO
PM00645	BLUEFIELDS (402)	1976	Nicaragua	Department of Agricultural Botany - University of Reading - Whiteknights -	Pepper	Capsicum	annuum var. glabriusculum	WILD	NO	NO
PM00646	RAMA	1976	Nicaragua	Department of Agricultural Botany - University of Reading - Whiteknights -	Pepper	Capsicum	annuum	WILD	NO	NO
PM00647	OAXACA (434)	1976	Mexico	Department of Agricultural Botany - University of Reading - Whiteknights -	Pepper	Capsicum	annuum		NO	NO
PM00648	TURTLE MOUND (4675)	1976	United States of America	Department of Agricultural Botany - University of Reading - Whiteknights -	Pepper	Capsicum	annuum	WILD	NO	NO
PM00650	GEPI	1976	Hungary	Inst. Hort. (Hungary)	Pepper	Capsicum	annuum		NO	YES
PM00651	CS-ZH GEPI	1976	Hungary	Inst. Hort. (Hungary)	Pepper	Capsicum	annuum		NO	YES
PM00652	SOROKSARI	1976	Hungary	Inst. Hort. (Hungary)	Pepper	Capsicum	annuum		NO	NO
PM00653	D.CECEI	1976	Hungary	Inst. Hort. (Hungary)	Pepper	Capsicum	annuum		NO	YES
PM00654	JAVITOTT CECEI	1976	Hungary	Inst. Hort. (Hungary)	Pepper	Capsicum	annuum		NO	YES
PM00655	TOCHIGISANTAKA	1976	Japan	Institute of Agriculture and Forestry, University of Tsukuba	Pepper	Capsicum	annuum		NO	YES
PM00656	KIIRO	1976	Japan	Institute of Agriculture and Forestry, University of Tsukuba	Pepper	Capsicum	annuum		NO	YES
PM00657	COLORADO	1977	Spain	Research Dept San Esteban de Gormaz Soria ESPAGNE	Pepper	Capsicum	annuum		NO	NO
PM00658	BOTIJILLO TINTO	1977	Spain	Research Dept San Esteban de Gormaz Soria ESPAGNE	Pepper	Capsicum	annuum		NO	YES
PM00659	PERENNIAL	1977	India	Department of Vegetable Crops, Landscaping and Floriculture, Punjab Agricultural University,	Pepper	Capsicum	annuum		NO	YES
PM00660	S118-2 SINGH2	1977	India	Department of Vegetable Crops, Landscaping and Floriculture, Punjab Agricultural University,	Pepper	Capsicum	annuum		NO	NO
PM00661	S41-1 SINGH3	1977	India	Department of Vegetable Crops, Landscaping and Floriculture, Punjab Agricultural University,	Pepper	Capsicum	annuum		NO	NO
PM00662	S20-1 SINGH4	1977	India	Department of Vegetable Crops, Landscaping and Floriculture, Punjab Agricultural University,	Pepper	Capsicum	annuum		NO	NO
PM00663	CHIHUAHUA (504 BP)	1977	Mexico	Department of Agricultural Botany - University of Reading - Whiteknights -	Pepper	Capsicum	annuum	WILD	NO	NO
PM00664	MONTERREY	1977	Mexico	Department of Agricultural Botany - University of Reading - Whiteknights -	Pepper	Capsicum	annuum	WILD	NO	NO
PM00665	NUEVO LEON C 70- 13	1977	Mexico	Department of Agricultural Botany - University of Reading - Whiteknights -	Pepper	Capsicum	annuum	WILD	NO	NO
PM00666	EL TAJIN	1977	Mexico	Department of Agricultural Botany - University of Reading - Whiteknights -	Pepper	Capsicum	annuum	WILD	NO	NO
PM00667	SANTA LUCIA	1977	Guatemala	Department of Agricultural Botany - University of Reading - Whiteknights -	Pepper	Capsicum	annuum	WILD	NO	NO
PM00668	TONOSI C 70- 1	1977	Panama	Department of Agricultural Botany - University of Reading - Whiteknights -	Pepper	Capsicum	annuum var. glabriusculum	WILD	NO	NO
PM00669	PANAMA CITY	1977	Panama	Department of Agricultural Botany - University of Reading - Whiteknights -	Pepper	Capsicum	annuum	WILD	NO	NO
PM00670	PITALITO	1977	Colombia	Department of Agricultural Botany - University of Reading - Whiteknights -	Pepper	Capsicum	annuum	WILD	NO	NO
PM00671	PIMENT DE SZENTES	1977	Hungary	Sonito	Pepper	Capsicum	annuum		NO	YES
PM00672	MISCUCHO PI315008	1977	Mexico	ETABLISSEMENTS CAILLARD	Pepper	Capsicum	chinense		NO	YES
PM00673	MISHME PI315023	1977	Mexico	ETABLISSEMENTS CAILLARD	Pepper	Capsicum	chinense		NO	YES
PM00674	COLORADO BIS	1977	Spain	Private individual	Pepper	Capsicum	annuum		NO	YES
PM00675	MOGA	1977	France	Gautier	Pepper	Capsicum	annuum		NO	NO
PM00676	BAK LOUTI	1978	Tunisia	Private individual	Pepper	Capsicum	annuum		NO	YES
PM00677	DAMAS	1978	Syrian Arab Republic	Private individual	Pepper	Capsicum	annuum		NO	YES
PM00678	STAOUELI	1978	Algeria	Private individual	Pepper	Capsicum	annuum		NO	NO
PM00679	n° 77-80-3	1978	Israel	The Agricultural Research Organization, The Volcani Center	Pepper	Capsicum	annuum		NO	NO
PM00680	N° 77-78	1978	Israel	The Agricultural Research Organization, The Volcani Center	Pepper	Capsicum	annuum		NO	YES
PM00681	N° 77-81-4	1978	Israel	The Agricultural Research Organization, The Volcani Center	Pepper	Capsicum	annuum		NO	YES
PM00682	POIVRON DE SHANGAÏ	1978	China	Private individual	Pepper	Capsicum	annuum		NO	YES
PM00683	VIOLETTA	1978	Netherlands	Private individual	Pepper	Capsicum	annuum		NO	NO
PM00684	Y 1	1978	China	CHINESE MISSION INFRANCE	Pepper	Capsicum	annuum		NO	YES
PM00685	Y 2	1978	China	CHINESE MISSION INFRANCE	Pepper	Capsicum	annuum		NO	YES
PM00686	PI271322	1978	India	USDA	Pepper	Capsicum	annuum		NO	NO
PM00687	PI322719	1978	India	USDA	Pepper	Capsicum	annuum		YES	YES
PM00688	BELDI 3	1978	Tunisia	Laboratoire de ressources génétiques Selektsijne,	Pepper	Capsicum	annuum		NO	YES
PM00689	D’HIRAT 2	1978	Tunisia	Laboratoire de ressources génétiques Selektsijne,	Pepper	Capsicum	annuum		NO	YES
PM00690	GABES IV P 5B	1978	Tunisia	Laboratoire de ressources génétiques Selektsijne,	Pepper	Capsicum	annuum		NO	YES
PM00692	CAPSICUM CHACOENSE	1979	Unknown	University of California DAVIS CALIFORNIE USA	Pepper	Capsicum	chacoense	WILD	NO	NO
PM00693	HATVANI	1979	Hungary	Unknown	Pepper	Capsicum	annuum		NO	YES
PM00694	CECEI	1979	Hungary	Unknown	Pepper	Capsicum	annuum		NO	YES
PM00696	KORBA 2	1978	Tunisia	INRAE	Pepper	Capsicum	annuum		NO	YES
PM00697	SOLIMAN 2	1978	Tunisia	INRAE	Pepper	Capsicum	annuum		NO	YES
PM00698	Poivron du KOUBAN	1979	Russian Federation	Unknown	Pepper	Capsicum	annuum		NO	YES
PM00699	ANAHEIM TMR 23	1980	United States of America	PETO SEED	Pepper	Capsicum	annuum		YES	YES
PM00700	PODAROK MOLDAVY	1980	Republic of Moldova	INRAE	Pepper	Capsicum	annuum		YES	YES
PM00701	L 29-6	1980	Mexico	INIA	Pepper	Capsicum	annuum		NO	YES
PM00702	CRIOLLO DE MORELOS 334	1980	Mexico	INIA	Pepper	Capsicum	annuum		YES	YES
PM00703	FLAMBEAU SM 477 P	1980	United States of America	INAT	Pepper	Capsicum	annuum		NO	YES
PM00704	LORAï	1980	India	Department of Vegetable Crops, Landscaping and Floriculture, Punjab Agricultural University,	Pepper	Capsicum	annuum		NO	YES
PM00705	SOROKSARI al+ /al+	1981	Hungary	Vegetable Crops Research Institute Budapest HONGRIE	Pepper	Capsicum	annuum		NO	YES
PM00706	SOROKSARI al /al	1981	Hungary	Vegetable Crops Research Institute Budapest HONGRIE	Pepper	Capsicum	annuum		NO	YES
PM00707	D. CECEI Li / Li	1981	Hungary	Vegetable Crops Research Institute Budapest HONGRIE	Pepper	Capsicum	annuum		NO	YES
PM00708	FEHEROZON Li / Li	1981	Hungary	Vegetable Crops Research Institute Budapest HONGRIE	Pepper	Capsicum	annuum		NO	YES
PM00709	SZARVASI 11	1981	Hungary	Vegetable Crops Research Institute Budapest HONGRIE	Pepper	Capsicum	annuum		NO	YES
PM00710	ALMAPAPRIKA	1981	Hungary	Vegetable Crops Research Institute Budapest HONGRIE	Pepper	Capsicum	annuum		NO	NO
PM00711	BALLON ROUGE	1981	Hungary	Vegetable Crops Research Institute Budapest HONGRIE	Pepper	Capsicum	annuum		NO	YES
PM00712	ZHAOFENG 1	1981	China	INRAE	Pepper	Capsicum	annuum		NO	NO
PM00713	X P H 832 (F1)	1981	France	ASGROW FRANCE	Pepper	Capsicum	annuum		NO	NO
PM00714	PIP ( XP 417 )	1981	France	ASGROW FRANCE	Pepper	Capsicum	annuum		NO	NO
PM00715	CALWONDER 300	1981	France	ASGROW FRANCE	Pepper	Capsicum	annuum		NO	NO
PM00716	MUTANT WAXY	1981	Algeria	Private individual	Pepper	Capsicum	annuum		NO	YES
PM00717	KATMANDU	1981	Nepal	INRAE	Pepper	Capsicum	annuum		NO	YES
PM00718	MAGHI MIRCHA	1981	India	INRAE	Pepper	Capsicum	annuum		NO	YES
PM00719	CHILI JWALA	1981	India	INRAE	Pepper	Capsicum	annuum		NO	YES
PM00720	CHILI MADURAI	1981	India	INRAE	Pepper	Capsicum	annuum		NO	YES
PM00721	MORALES PRV121 "MORA"	1981	Mexico	INIA	Pepper	Capsicum	annuum		YES	YES
PM00722	POZO PRV 122	1981	Mexico	INIA	Pepper	Capsicum	annuum		NO	YES
PM00723	D' HIRAT P3 -P15	1981	Tunisia	Laboratoire de ressources génétiques Selektsijne,	Pepper	Capsicum	annuum		NO	NO
PM00725	VYUCO	1981	Argentina	PETO SEED	Pepper	Capsicum	annuum		NO	NO
PM00726	CITADEL	1981	Argentina	PETO SEED	Pepper	Capsicum	annuum		NO	NO
PM00727	L 30	1981	Tunisia	Laboratoire de ressources génétiques Selektsijne,	Pepper	Capsicum	annuum		NO	NO
PM00728	LAC ZIWAI	1977	Ethiopia	Private individual	Pepper	Capsicum	annuum		NO	YES
PM00729	SODDO ABELA	1977	Ethiopia	Private individual	Pepper	Capsicum	annuum		NO	YES
PM00730	DALBON	1981	United States of America	PETO SEED	Pepper	Capsicum	annuum		NO	NO
PM00731	GOLDEN BELL	1981	United States of America	PETO SEED	Pepper	Capsicum	annuum		NO	NO
PM00732	674 CAPSICUM SPP	1981	Colombia	Private individual	Pepper	Capsicum	chinense		NO	YES
PM00734	CHILI (Yellow)	1981	Thailand	Private individual	Pepper	Capsicum	annuum		NO	YES
PM00735	BIRD PEPPER	1981	Thailand	Private individual	Pepper	Capsicum	annuum		NO	YES
PM00737	KISANGANI M I / 81	1981	Democratic Republic of the Congo	Unknown	Pepper	Capsicum	chinense		NO	YES
PM00738	KISANGANI M II / 81	1981	Democratic Republic of the Congo	Unknown	Pepper	Capsicum	chinense		NO	YES
PM00739	KISANGANI M IV / 81	1981	Democratic Republic of the Congo	Unknown	Pepper	Capsicum	chinense		NO	NO
PM00740	KISANGANI M V / 81	1981	Democratic Republic of the Congo	Unknown	Pepper	Capsicum	chinense		NO	NO
PM00741	11B14	1982	Turkey	Cukurova University, Faculty of Agriculture, Department of Horticulture	Pepper	Capsicum	annuum		NO	NO
PM00742	DORN 16	1982	Turkey	Cukurova University, Faculty of Agriculture, Department of Horticulture	Pepper	Capsicum	annuum		NO	NO
PM00743	ATA 100	1982	Turkey	Cukurova University, Faculty of Agriculture, Department of Horticulture	Pepper	Capsicum	annuum		NO	NO
PM00744	CETINEL 150	1982	Turkey	Cukurova University, Faculty of Agriculture, Department of Horticulture	Pepper	Capsicum	annuum		NO	NO
PM00745	INCESIVRI 35	1982	Turkey	Cukurova University, Faculty of Agriculture, Department of Horticulture	Pepper	Capsicum	annuum		NO	NO
PM00746	ILICA 256	1982	Turkey	Cukurova University, Faculty of Agriculture, Department of Horticulture	Pepper	Capsicum	annuum		NO	NO
PM00747	INCESU 18	1982	Turkey	Cukurova University, Faculty of Agriculture, Department of Horticulture	Pepper	Capsicum	annuum		NO	NO
PM00748	ESKISEHIR CARLISTON	1982	Turkey	Cukurova University, Faculty of Agriculture, Department of Horticulture	Pepper	Capsicum	annuum		NO	YES
PM00749	11 B 190	1982	Turkey	Cukurova University, Faculty of Agriculture, Department of Horticulture	Pepper	Capsicum	annuum		NO	NO
PM00750	CARLISTON 52	1982	Turkey	Cukurova University, Faculty of Agriculture, Department of Horticulture	Pepper	Capsicum	annuum		NO	NO
PM00751	ANAHEIM LELY	1982	Ethiopia	Private individual	Pepper	Capsicum	annuum		YES	YES
PM00752	C 75 - 3	1982	France	ETABLISSEMENTS CAILLARD	Pepper	Capsicum	annuum		NO	NO
PM00753	LONGEE	1982	India	Vegetable Crops Research Institute Budapest HONGRIE	Pepper	Capsicum	annuum		NO	YES
PM00754	PANT C1	1982	India	Vegetable Crops Research Institute Budapest HONGRIE	Pepper	Capsicum	annuum		NO	NO
PM00755	50 (GOIAS)	1982	Brazil	Plant Patho EMBRAPA BRESIL	Pepper	Capsicum	baccatum		NO	NO
PM00756	52 (GOIAS)	1982	Brazil	Plant Patho EMBRAPA BRESIL	Pepper	Capsicum	baccatum		NO	NO
PM00758	58 (BAHIA )	1982	Brazil	EMBRAPA	Pepper	Capsicum	chinense		NO	NO
PM00759	61 (GOIAS) OLHO DE GAUSE	1982	Brazil	EMBRAPA	Pepper	Capsicum	chinense		NO	NO
PM00760	62 (MINAS GERAIS )	1982	Brazil	EMBRAPA	Pepper	Capsicum	frutescens		NO	NO
PM00761	B. G. 1751 ( 271180-01)	1982	Mexico	INIA	Pepper	Capsicum	pubescens		NO	NO
PM00762	B. G. 1755 ( 281180-04)	1982	Mexico	INIA	Pepper	Capsicum	pubescens		NO	NO
PM00763	MUNTENIA	1982	Romania	Private individual	Pepper	Capsicum	annuum		NO	NO
PM00764	EXPORT	1982	Romania	Private individual	Pepper	Capsicum	annuum		NO	NO
PM00765	AROMA	1982	Romania	Private individual	Pepper	Capsicum	annuum		NO	YES
PM00766	TITAN	1982	Romania	Private individual	Pepper	Capsicum	annuum		NO	NO
PM00767	RUBIN	1982	Romania	Private individual	Pepper	Capsicum	annuum		NO	YES
PM00768	SPLENDID	1982	Romania	Private individual	Pepper	Capsicum	annuum		NO	YES
PM00769	ZAO FENG	1983	China	Vegetable Breeding Station BEIJING CHINE	Pepper	Capsicum	annuum		NO	YES
PM00770	DA -TONG EARLY	1983	China	Vegetable Breeding Station BEIJING CHINE	Pepper	Capsicum	annuum		NO	YES
PM00771	YONG JIU 3	1983	China	Vegetable Breeding Station BEIJING CHINE	Pepper	Capsicum	annuum		NO	YES
PM00772	QIE ME	1983	China	Vegetable Breeding Station BEIJING CHINE	Pepper	Capsicum	annuum		NO	NO
PM00773	SAN DAO JIN	1983	China	Vegetable Breeding Station BEIJING CHINE	Pepper	Capsicum	annuum		NO	NO
PM00774	ER ZHU ZUI	1983	China	Vegetable Breeding Station BEIJING CHINE	Pepper	Capsicum	annuum		NO	NO
PM00775	BEN XI	1983	China	Vegetable Breeding Station BEIJING CHINE	Pepper	Capsicum	annuum		YES	YES
PM00776	NANJING EARLY PEPPER	1983	China	Vegetable Breeding Station BEIJING CHINE	Pepper	Capsicum	annuum		NO	YES
PM00777	GOLDEN MEDAL	1983	Bulgaria	Vegetable Breeding Station BEIJING CHINE	Pepper	Capsicum	annuum		NO	YES
PM00778	77 - 14	1983	Austria	Vegetable Breeding Station BEIJING CHINE	Pepper	Capsicum	annuum		NO	NO
PM00779	HUANG FANG	1983	Bulgaria	Vegetable Breeding Station BEIJING CHINE	Pepper	Capsicum	annuum		NO	NO
PM00780	CHERRY PEPPER	1983	China	Vegetable Breeding Station BEIJING CHINE	Pepper	Capsicum	annuum		NO	YES
PM00781	HOT CALORA YELLOW WAX	1983	China	Vegetable Breeding Station BEIJING CHINE	Pepper	Capsicum	annuum		NO	YES
PM00782	HA - TA - WA - NI	1983	China	Vegetable Breeding Station BEIJING CHINE	Pepper	Capsicum	annuum		NO	NO
PM00783	SMALL PEPPER	1983	Japan	Vegetable Breeding Station BEIJING CHINE	Pepper	Capsicum	annuum		NO	YES
PM00785	PEPPER WITH CRISPED SKIN	1983	China	Vegetable Breeding Station BEIJING CHINE	Pepper	Capsicum	annuum		NO	YES
PM00787	ROBUR	1983	United States of America	Hoticulture Department, Auburn University	Pepper	Capsicum	annuum		NO	NO
PM00788	APLATI	1983	United States of America	Hoticulture Department, Auburn University	Pepper	Capsicum	annuum		NO	NO
PM00791	PIMIENTO 2	1983	United States of America	Hoticulture Department, Auburn University	Pepper	Capsicum	annuum		NO	NO
PM00792	ARRONDI	1983	United States of America	Hoticulture Department, Auburn University	Pepper	Capsicum	annuum		NO	YES
PM00793	TYPE BIGHART 1	1983	United States of America	Hoticulture Department, Auburn University	Pepper	Capsicum	annuum		NO	YES
PM00794	TYPE BIGHART 2	1983	United States of America	Hoticulture Department, Auburn University	Pepper	Capsicum	annuum		NO	NO
PM00795	PEPERONCENI	1983	United States of America	Hoticulture Department, Auburn University	Pepper	Capsicum	annuum		NO	YES
PM00796	M81-61 P6	1983	United States of America	Hoticulture Department, Auburn University	Pepper	Capsicum	annuum		NO	YES
PM00797	POIVRE ROUGE DE BRESSE	1983	France	CNRS	Pepper	Capsicum	annuum		YES	YES
PM00798	MARSEILLAIS	1983	France	INRAE	Pepper	Capsicum	annuum		YES	YES
PM00799	NOVI 3	1983	Netherlands	BRUINSMA	Pepper	Capsicum	annuum		YES	YES
PM00800	FLORIDA VR4	1983	United States of America	Gautier	Pepper	Capsicum	annuum		NO	NO
PM00801	PIMENT d' ESPELETTE	1983	France	Chambre d'agriculture Pyrénées Atlantiques	Pepper	Capsicum	annuum		YES	YES
PM00802	SAFI	1984	Senegal	Centre pour le Développement de l'Horticulture	Pepper	Capsicum	chinense		NO	YES
PM00803	JAUNE DE HAUTE VOLTA	1984	Senegal	Centre pour le Développement de l'Horticulture	Pepper	Capsicum	chinense		NO	YES
PM00804	P 43 MARAKO	1984	Ethiopia	Private individual	Pepper	Capsicum	annuum		NO	NO
PM00805	P 44 MARAKO ALABA	1984	Ethiopia	Private individual	Pepper	Capsicum	annuum		NO	NO
PM00806	KENYA HOT PEPPER	1984	Ethiopia	Private individual	Pepper	Capsicum	annuum		NO	NO
PM00807	H3	1984	Ethiopia	Private individual	Pepper	Capsicum	annuum		NO	NO
PM00808	BIG STAR	1984	China	Vegetable Breeding Station BEIJING CHINE	Pepper	Capsicum	annuum		NO	YES
PM00809	EARLY SPRING GREEN	1984	China	Vegetable Breeding Station BEIJING CHINE	Pepper	Capsicum	annuum		NO	NO
PM00810	BIG STAR (13 - 02)	1984	China	Vegetable Breeding Station BEIJING CHINE	Pepper	Capsicum	annuum		NO	NO
PM00811	83 - 130	1984	China	Vegetable Breeding Station BEIJING CHINE	Pepper	Capsicum	annuum		NO	NO
PM00812	APASEO (Pasilla)	1984	Mexico	Vegetable Breeding Station BEIJING CHINE	Pepper	Capsicum	annuum		NO	NO
PM00813	TONG FENG - 37	1984	China	Vegetable Breeding Station BEIJING CHINE	Pepper	Capsicum	annuum		NO	NO
PM00814	DAI WANG	1984	China	Vegetable Breeding Station BEIJING CHINE	Pepper	Capsicum	annuum		NO	NO
PM00815	ER FU TOU	1984	China	Vegetable Breeding Station BEIJING CHINE	Pepper	Capsicum	annuum		NO	NO
PM00816	KALEIDOSCOP	1984	China	Vegetable Breeding Station BEIJING CHINE	Pepper	Capsicum	baccatum		NO	NO
PM00817	SHI JIE GUAN JUN	1984	China	Vegetable Breeding Station BEIJING CHINE	Pepper	Capsicum	annuum		NO	NO
PM00818	TONG FENG 16	1984	China	Vegetable Breeding Station BEIJING CHINE	Pepper	Capsicum	annuum		NO	NO
PM00819	CHAO TIAN JIAO	1984	China	Vegetable Breeding Station BEIJING CHINE	Pepper	Capsicum	annuum		NO	NO
PM00820	MORAVA	1984	Czechia	Private individual	Pepper	Capsicum	annuum		NO	NO
PM00821	PERLA	1984	Czechia	Private individual	Pepper	Capsicum	annuum		NO	NO
PM00822	KLENOT	1984	Czechia	Private individual	Pepper	Capsicum	annuum		NO	NO
PM00823	BRANAT	1984	Czechia	Private individual	Pepper	Capsicum	annuum		NO	NO
PM00824	CITRINA	1984	Czechia	Private individual	Pepper	Capsicum	annuum		NO	NO
PM00825	KONIKA	1984	Czechia	Private individual	Pepper	Capsicum	annuum		NO	NO
PM00826	MEDALLA DE ORO	1984	Bulgaria	Private individual	Pepper	Capsicum	annuum		NO	NO
PM00827	MATOUBA	1983	Guadeloupe	Unknown	Pepper	Capsicum	chinense		NO	NO
PM00828	AC1534	1984	United States of America	University of California DAVIS CALIFORNIE USA	Pepper	Capsicum	annuum	WILD	NO	NO
PM00829	CRIOLLO DE MORELOS CM 329	1984	Mexico	INIA	Pepper	Capsicum	annuum		NO	NO
PM00830	CRIOLLO DE MORELOS CM330	1984	Mexico	INIA	Pepper	Capsicum	annuum		NO	NO
PM00831	CRIOLLO DE MORELOS CM331	1984	Mexico	INIA	Pepper	Capsicum	annuum		NO	NO
PM00832	JU - SP 1980 - 12	1984	Serbia	SMEDEREVSKA PALANSKA YOUGOSLAVIE	Pepper	Capsicum	annuum		NO	NO
PM00833	JU SP 1980 - 08	1984	Serbia	SMEDEREVSKA PALANSKA YOUGOSLAVIE	Pepper	Capsicum	annuum		NO	NO
PM00834	AC 1448	1984	Republic of Korea	Hortical Experimental Station,	Pepper	Capsicum	annuum		NO	NO
PM00835	TABASCO	1984	Republic of Korea	Hortical Experimental Station,	Pepper	Capsicum	annuum		NO	NO
PM00836	PI369940	1984	Republic of Korea	Hortical Experimental Station,	Pepper	Capsicum	annuum		NO	NO
PM00837	INDONESIEN	1984	Republic of Korea	Hortical Experimental Station,	Pepper	Capsicum	annuum		NO	NO
PM00838	PI323314	1984	Republic of Korea	Hortical Experimental Station,	Pepper	Capsicum	annuum		NO	NO
PM00839	KALCHO	1984	Republic of Korea	Hortical Experimental Station,	Pepper	Capsicum	annuum		NO	NO
PM00840	GAEROUGSAN	1984	Republic of Korea	Hortical Experimental Station,	Pepper	Capsicum	annuum		NO	NO
PM00841	SHINPYUNG 1	1984	Republic of Korea	Hortical Experimental Station,	Pepper	Capsicum	annuum		NO	NO
PM00842	MASAN	1984	Republic of Korea	Hortical Experimental Station,	Pepper	Capsicum	annuum		NO	YES
PM00843	GIMJANGGOCHU	1984	Republic of Korea	Hortical Experimental Station,	Pepper	Capsicum	annuum		NO	NO
PM00844	LONG PIQUANT	1984	Philippines	Private individual	Pepper	Capsicum	annuum		NO	NO
PM00845	QUADRATTO D' ASTI JAUNE	1984	Italy	INRAE	Pepper	Capsicum	annuum		NO	NO
PM00846	HDA (591) a4	1984	France	Vilmorin ( Limagrain Hm-Clause)	Pepper	Capsicum	annuum		NO	NO
PM00847	HDA (591) a30	1984	France	Vilmorin ( Limagrain Hm-Clause)	Pepper	Capsicum	annuum		NO	NO
PM00848	HDA (591) a74	1984	France	Vilmorin ( Limagrain Hm-Clause)	Pepper	Capsicum	annuum		NO	NO
PM00849	DECORATIF ITALIE 1	1984	Italy	INRAE	Pepper	Capsicum	annuum		NO	YES
PM00850	DECORATIF ITALIE 2	1984	Italy	INRAE	Pepper	Capsicum	annuum		NO	YES
PM00851	YOLO NR ( N )	1984	Brazil	INRAE	Pepper	Capsicum	annuum		YES	YES
PM00852	SHUANG FENG (F1)	1985	China	INSTITUTE OF VEGETABLES AND FLOWERS - CAAS	Pepper	Capsicum	annuum		NO	NO
PM00853	ZHONG JIAO 2	1985	China	INSTITUTE OF VEGETABLES AND FLOWERS - CAAS	Pepper	Capsicum	annuum		NO	NO
PM00854	Capsicum Annuum 25	1985	China	INSTITUTE OF VEGETABLES AND FLOWERS - CAAS	Pepper	Capsicum	annuum		NO	NO
PM00855	Capsicum Annuum 26 -1	1985	China	INSTITUTE OF VEGETABLES AND FLOWERS - CAAS	Pepper	Capsicum	annuum		NO	NO
PM00856	Capsicum Annuum 27 -1	1985	China	INSTITUTE OF VEGETABLES AND FLOWERS - CAAS	Pepper	Capsicum	annuum		NO	NO
PM00857	Capsicum Annuum 29 -1	1985	China	INSTITUTE OF VEGETABLES AND FLOWERS - CAAS	Pepper	Capsicum	annuum		NO	NO
PM00858	Capsicum Annuum 81 - 460	1985	China	INSTITUTE OF VEGETABLES AND FLOWERS - CAAS	Pepper	Capsicum	annuum		NO	NO
PM00859	Capsicum Annuum 83 - 113	1985	China	INSTITUTE OF VEGETABLES AND FLOWERS - CAAS	Pepper	Capsicum	annuum		NO	NO
PM00860	Capsicum Annuum 83 - 115	1985	China	INSTITUTE OF VEGETABLES AND FLOWERS - CAAS	Pepper	Capsicum	annuum		NO	NO
PM00861	Capsicum Annuum 83 -171	1985	China	INSTITUTE OF VEGETABLES AND FLOWERS - CAAS	Pepper	Capsicum	annuum		NO	NO
PM00862	Capsicum Annuum 83 -175	1985	China	INSTITUTE OF VEGETABLES AND FLOWERS - CAAS	Pepper	Capsicum	annuum		NO	NO
PM00863	Capsicum Annuum 83 - 181	1985	China	INSTITUTE OF VEGETABLES AND FLOWERS - CAAS	Pepper	Capsicum	annuum		NO	NO
PM00864	LYULIN (F1)	1985	Bulgaria	Institut de génétique	Pepper	Capsicum	annuum		NO	NO
PM00865	CHIBAN	1985	China	Private individual	Pepper	Capsicum	annuum		NO	NO
PM00866	QIEMEN	1985	China	Private individual	Pepper	Capsicum	annuum		NO	NO
PM00867	(Meski x 872) AP1 - B1	1985	Tunisia	Laboratoire de ressources génétiques Selektsijne,	Pepper	Capsicum	annuum		NO	NO
PM00868	BREMONT - 1	1985	France	Vilmorin ( Limagrain Hm-Clause)	Pepper	Capsicum	annuum		NO	NO
PM00869	BREMONT - 2	1985	France	Vilmorin ( Limagrain Hm-Clause)	Pepper	Capsicum	annuum		NO	NO
PM00870	HUNAN PEPPER	1985	China	Vegetable Research Institute JIANGSU	Pepper	Capsicum	annuum		NO	NO
PM00871	DARK GREEN EARLY	1985	China	Vegetable Research Institute JIANGSU	Pepper	Capsicum	annuum		NO	NO
PM00872	SWEET PEPPER	1985	Japan	AGRI OBTENTION	Pepper	Capsicum	annuum		NO	NO
PM00873	GREEN HORN	1985	Japan	Takii	Pepper	Capsicum	annuum		NO	NO
PM00874	NEW ACE	1985	Japan	Takii	Pepper	Capsicum	annuum		NO	NO
PM00875	BERUHOMARE (F1)	1985	Japan	Takii	Pepper	Capsicum	annuum		NO	NO
PM00876	TALTOS VR 80	1985	Hungary	PESTI VETOMAG SEED PRODUCING TRADING ENTERPRISE, SZENTES HONGRIE	Pepper	Capsicum	annuum		NO	NO
PM00877	V 178	1985	Hungary	PESTI VETOMAG SEED PRODUCING TRADING ENTERPRISE, SZENTES HONGRIE	Pepper	Capsicum	annuum		NO	NO
PM00878	GREGGO	1985	Hungary	PESTI VETOMAG SEED PRODUCING TRADING ENTERPRISE, SZENTES HONGRIE	Pepper	Capsicum	annuum		NO	NO
PM00879	FEHEROZON Synthétic	1985	Hungary	PESTI VETOMAG SEED PRODUCING TRADING ENTERPRISE, SZENTES HONGRIE	Pepper	Capsicum	annuum		NO	YES
PM00880	MUTANT 704	1985	Italy	Enea	Pepper	Capsicum	annuum		NO	NO
PM00881	GYPSY	1986	China	INSTITUTE OF VEGETABLES AND FLOWERS - CAAS	Pepper	Capsicum	annuum		NO	NO
PM00882	PAPRIKA PIMENT	1986	China	INSTITUTE OF VEGETABLES AND FLOWERS - CAAS	Pepper	Capsicum	annuum		NO	NO
PM00883	AUTONA	1986	China	INSTITUTE OF VEGETABLES AND FLOWERS - CAAS	Pepper	Capsicum	annuum		NO	NO
PM00884	DENG LONG JIAO	1986	China	INSTITUTE OF VEGETABLES AND FLOWERS - CAAS	Pepper	Capsicum	annuum		NO	NO
PM00885	F1 (Austria 77 16 x Er Zhu Zui )	1986	China	INSTITUTE OF VEGETABLES AND FLOWERS - CAAS	Pepper	Capsicum	annuum		NO	NO
PM00886	F1 (Autria 77 16 x World Beater )	1986	China	INSTITUTE OF VEGETABLES AND FLOWERS - CAAS	Pepper	Capsicum	annuum		NO	NO
PM00887	F1 (Austria 77 16 x Qie Me )	1986	China	INSTITUTE OF VEGETABLES AND FLOWERS - CAAS	Pepper	Capsicum	annuum		NO	NO
PM00888	F1 ( Austria 77 16 x Ba Yan )	1986	China	INSTITUTE OF VEGETABLES AND FLOWERS - CAAS	Pepper	Capsicum	annuum		NO	NO
PM00889	HARICOT ROUGE	1986	France	Unknown	Pepper	Capsicum	annuum		NO	YES
PM00890	AC 298 NMC	1986	United States of America	NEW MEXICO STATE UNIVERSITY	Pepper	Capsicum	annuum		NO	NO
PM00891	PI439391	1985	Peru	Unknown	Pepper	Capsicum	annuum		NO	NO
PM00892	PI39378	1985	Jamaica	Unknown	Pepper	Capsicum	annuum		NO	NO
PM00893	N° 230	1985	Jamaica	Unknown	Pepper	Capsicum	annuum		NO	NO
PM00894	BAJIO 1020	1986	Mexico	INRAE	Pepper	Capsicum	annuum		NO	NO
PM00895	RPC 1 I	1986	Brazil	INRAE	Pepper	Capsicum	annuum		NO	NO
PM00896	MORRON LUESIA	1986	Spain	INRAE	Pepper	Capsicum	annuum		NO	YES
PM00897	P 1000	1986	France	ETABLISSEMENTS CAILLARD	Pepper	Capsicum	annuum		NO	NO
PM00898	TCHAOUROU	1987	Benin	Private individual	Pepper	Capsicum	annuum		NO	NO
PM00899	PERMAGREEN	1987	Israel	Private individual	Pepper	Capsicum	annuum		NO	NO
PM00900	RUBIN	1987	Czechia	Res.Inst.Vegetable Growing and Breeding	Pepper	Capsicum	annuum		NO	NO
PM00901	JUBILANTKA	1987	Czechia	Res.Inst.Vegetable Growing and Breeding	Pepper	Capsicum	annuum		NO	NO
PM00902	KARMEN	1987	Czechia	Res.Inst.Vegetable Growing and Breeding	Pepper	Capsicum	annuum		NO	NO
PM00903	VESNA	1987	Czechia	Res.Inst.Vegetable Growing and Breeding	Pepper	Capsicum	annuum		NO	NO
PM00904	DORA	1987	Czechia	Res.Inst.Vegetable Growing and Breeding	Pepper	Capsicum	annuum		NO	NO
PM00905	PAGANI 1	1987	Italy	INRAE	Pepper	Capsicum	annuum		NO	YES
PM00906	PAGANI 2	1987	Italy	INRAE	Pepper	Capsicum	annuum		NO	YES
PM00907	MEXICO	1987	Mexico	Private individual	Pepper	Capsicum	annuum		NO	NO
PM00908	DOLMA	1988	Turkey	ASL	Pepper	Capsicum	annuum		NO	NO
PM00909	CARLISTON	1988	Turkey	ASL	Pepper	Capsicum	annuum		NO	NO
PM00910	TATLI SIVRI	1988	Turkey	ASL	Pepper	Capsicum	annuum		NO	NO
PM00912	ACI SIVRI	1988	Turkey	ASL	Pepper	Capsicum	annuum		NO	NO
PM00913	KANDIL A	1988	Turkey	ASL	Pepper	Capsicum	annuum		NO	NO
PM00914	KANDIL B	1988	Turkey	ASL	Pepper	Capsicum	annuum		NO	NO
PM00915	11 B 14	1988	Turkey	ASL	Pepper	Capsicum	annuum		NO	NO
PM00916	JUPITER	1988	Netherlands	GEVES	Pepper	Capsicum	annuum		NO	NO
PM00917	ARIANE	1988	Netherlands	GEVES	Pepper	Capsicum	annuum		NO	NO
PM00918	POIVRON DE CUNEO	1988	Italy	Unknown	Pepper	Capsicum	annuum		NO	NO
PM00919	SHUANG FENG	1988	China	Private individual	Pepper	Capsicum	annuum		NO	NO
PM00920	ZHONG JIAO 2	1988	China	Private individual	Pepper	Capsicum	annuum		NO	NO
PM00921	QIE MEN	1988	China	Private individual	Pepper	Capsicum	annuum		NO	NO
PM00923	PLAT ROUGE	1988	Guadeloupe	INRAE	Pepper	Capsicum	chinense		NO	NO
PM00924	ROUGE	1988	Guadeloupe	INRAE	Pepper	Capsicum	chinense		NO	NO
PM00925	JAUNE PETIT	1988	Guadeloupe	INRAE	Pepper	Capsicum	chinense		NO	NO
PM00926	JAUNE LARGE B	1988	Guadeloupe	INRAE	Pepper	Capsicum	chinense		NO	NO
PM00927	ROUGE DOUX	1988	Haiti	INRAE	Pepper	Capsicum	annuum		NO	NO
PM00928	GOLDEN SUMMER	1988	United States of America	GEVES	Pepper	Capsicum	annuum		NO	NO
PM00929	MAVRAS	1988	Netherlands	GEVES	Pepper	Capsicum	annuum		NO	NO
PM00930	FLEURS VIOLETTES	1988	United States of America	INRAE	Pepper	Capsicum	annuum		NO	NO
PM00931	RED CHILE	1988	United States of America	INRAE	Pepper	Capsicum	annuum		NO	NO
PM00933	CHILIPEQUIN	1988	United States of America	INRAE	Pepper	Capsicum	annuum		NO	NO
PM00934	CUBICO	1988	Netherlands	De Ruiter	Pepper	Capsicum	annuum		NO	NO
PM00935	DELGADO	1988	Netherlands	De Ruiter	Pepper	Capsicum	annuum		NO	NO
PM00936	BRYZA	1989	Poland	Warsaw Agricultural University	Pepper	Capsicum	annuum		NO	NO
PM00937	JANTAR	1989	Poland	Warsaw Agricultural University	Pepper	Capsicum	annuum		NO	NO
PM00938	KUJAWIONKA	1989	Poland	Warsaw Agricultural University	Pepper	Capsicum	annuum		NO	NO
PM00939	PASSAT	1989	Poland	Warsaw Agricultural University	Pepper	Capsicum	annuum		NO	NO
PM00940	ZEFIR	1989	Poland	Warsaw Agricultural University	Pepper	Capsicum	annuum		NO	NO
PM00941	CYKLON	1989	Poland	Warsaw Agricultural University	Pepper	Capsicum	annuum		NO	NO
PM00942	INO	1989	Poland	Warsaw Agricultural University	Pepper	Capsicum	annuum		NO	NO
PM00943	KANO	1989	Poland	Warsaw Agricultural University	Pepper	Capsicum	annuum		NO	NO
PM00944	STANO	1989	Poland	Warsaw Agricultural University	Pepper	Capsicum	annuum		NO	NO
PM00945	POPULATION P	1989	Poland	Warsaw Agricultural University	Pepper	Capsicum	annuum		NO	NO
PM00946	DAX	1989	France	Unknown	Pepper	Capsicum	annuum		NO	NO
PM00947	187314	1989	Guatemala	NEW MEXICO STATE UNIVERSITY	Pepper	Capsicum	annuum		NO	NO
PM00948	187330	1989	Guatemala	NEW MEXICO STATE UNIVERSITY	Pepper	Capsicum	annuum		NO	NO
PM00949	PI187331	1989	Guatemala	NEW MEXICO STATE UNIVERSITY	Pepper	Capsicum	annuum		NO	NO
PM00950	195300	1989	Guatemala	NEW MEXICO STATE UNIVERSITY	Pepper	Capsicum	annuum		NO	NO
PM00951	224429	1989	Guatemala	NEW MEXICO STATE UNIVERSITY	Pepper	Capsicum	annuum		NO	NO
PM00952	224432	1989	Guatemala	NEW MEXICO STATE UNIVERSITY	Pepper	Capsicum	frutescens		NO	NO
PM00953	224433	1986	Guatemala	NEW MEXICO STATE UNIVERSITY	Pepper	Capsicum	annuum		NO	NO
PM00954	234250	1989	Guatemala	NEW MEXICO STATE UNIVERSITY	Pepper	Capsicum	annuum		NO	NO
PM00955	267734	1989	Guatemala	NEW MEXICO STATE UNIVERSITY	Pepper	Capsicum	annuum		NO	NO
PM00956	267736	1989	Guatemala	NEW MEXICO STATE UNIVERSITY	Pepper	Capsicum	annuum		NO	NO
PM00957	DARK PURPLE LEAF	1989	United States of America	ITHACA USA	Pepper	Capsicum	annuum		NO	NO
PM00958	POIVRON JAUNE	1989	France	Private individual	Pepper	Capsicum	annuum		YES	YES
PM00959	HAIHUA N°3	1989	China	INRAE	Pepper	Capsicum	annuum		NO	NO
PM00960	F1 ZHONGJIAO N°4	1989	China	INRAE	Pepper	Capsicum	annuum		NO	NO
PM00961	TAMATAVE LONG	1989	Madagascar	INRAE	Pepper	Capsicum	chinense		NO	NO
PM00962	TAMATAVE COURT	1989	Madagascar	INRAE	Pepper	Capsicum	chinense		NO	NO
PM00963	VAVATE	1989	Madagascar	INRAE	Pepper	Capsicum	chinense		NO	NO
PM00964	TAMATAVE	1989	Madagascar	INRAE	Pepper	Capsicum	chinense		NO	NO
PM00965	TAMATAVE	1989	Madagascar	INRAE	Pepper	Capsicum	chinense		NO	NO
PM00966	DIEGO ORANGE	1989	Madagascar	INRAE	Pepper	Capsicum	chinense		NO	NO
PM00967	DIEGO	1989	Madagascar	INRAE	Pepper	Capsicum	chinense		NO	NO
PM00968	DIEGO LONG CONIQUE	1989	Madagascar	INRAE	Pepper	Capsicum	annuum		NO	NO
PM00969	DIEGO COURT CONIQUE	1989	Madagascar	INRAE	Pepper	Capsicum	annuum		NO	YES
PM00970	SAINTE MARIE	1989	Madagascar	INRAE	Pepper	Capsicum	frutescens		NO	YES
PM00971	TAMATAVE PETIT PIMENT	1989	Madagascar	INRAE	Pepper	Capsicum	chinense		NO	YES
PM00972	QUADRATO D'ASTI ROUGE	1989	Italy	INRAE	Pepper	Capsicum	annuum		NO	NO
PM00973	CARRE D'ASTI JAUNE	1989	Italy	INRAE	Pepper	Capsicum	annuum		NO	NO
PM00974	LAICHI-2	1989	India	Department of Vegetable Crops, Landscaping and Floriculture, Punjab Agricultural University,	Pepper	Capsicum	annuum		NO	NO
PM00975	BG-1	1989	India	Department of Vegetable Crops, Landscaping and Floriculture, Punjab Agricultural University,	Pepper	Capsicum	annuum		NO	NO
PM00976	INDONESIAN SEL.	1989	India	Department of Vegetable Crops, Landscaping and Floriculture, Punjab Agricultural University,	Pepper	Capsicum	annuum		NO	NO
PM00977	L.25	1989	Serbia	SMEDEREVSKA PALANSKA YOUGOSLAVIE	Pepper	Capsicum	annuum		NO	NO
PM00978	A1.12	1989	Serbia	SMEDEREVSKA PALANSKA YOUGOSLAVIE	Pepper	Capsicum	annuum		NO	NO
PM00979	SAINT EDMOND	1989	France	INRAE	Pepper	Capsicum	annuum		NO	NO
PM00980	HUNDASHKE	1989	Albania	Institut des légumes et de la pomme de terre	Pepper	Capsicum	annuum		NO	NO
PM00981	VETHKE	1989	Albania	Institut des légumes et de la pomme de terre	Pepper	Capsicum	annuum		NO	NO
PM00982	LAKNAS	1989	Albania	Institut des légumes et de la pomme de terre	Pepper	Capsicum	annuum		NO	NO
PM00983	PEZA	1989	Albania	Institut des légumes et de la pomme de terre	Pepper	Capsicum	annuum		NO	NO
PM00984	SZENTESI PIACOS	1990	Hungary	VETOMAG	Pepper	Capsicum	annuum		NO	NO
PM00985	BAILI 1	1990	Chad	INRAE	Pepper	Capsicum	chinense		NO	NO
PM00986	BAILI 2	1990	Chad	INRAE	Pepper	Capsicum	chinense		NO	NO
PM00987	BAILI 3	1990	Chad	INRAE	Pepper	Capsicum	chinense		NO	NO
PM00988	PILI-PILI	1990	Chad	INRAE	Pepper	Capsicum	frutescens		NO	NO
PM00989	BOUSSO 1	1990	Chad	INRAE	Pepper	Capsicum	annuum		NO	NO
PM00990	F1 14-10	1990	Albania	Institut des légumes et de la pomme de terre	Pepper	Capsicum	annuum		NO	NO
PM00991	CUBA 1	1990	Cuba	Instituto de Investigaciones Hortícolas Liliana Dimitrova,	Pepper	Capsicum	annuum		NO	NO
PM00992	CUBA 2	1990	Cuba	Instituto de Investigaciones Hortícolas Liliana Dimitrova,	Pepper	Capsicum	annuum		NO	NO
PM00993	CUBA 3	1990	Cuba	Instituto de Investigaciones Hortícolas Liliana Dimitrova,	Pepper	Capsicum	annuum		NO	NO
PM00994	CUBA 6	1990	Cuba	Instituto de Investigaciones Hortícolas Liliana Dimitrova,	Pepper	Capsicum	annuum		NO	NO
PM00995	CUBA 7	1990	Cuba	Instituto de Investigaciones Hortícolas Liliana Dimitrova,	Pepper	Capsicum	annuum		NO	NO
PM00996	CUBA 8	1990	Cuba	Instituto de Investigaciones Hortícolas Liliana Dimitrova,	Pepper	Capsicum	annuum		NO	NO
PM00997	CUBA 9	1990	Cuba	Instituto de Investigaciones Hortícolas Liliana Dimitrova,	Pepper	Capsicum	annuum		NO	NO
PM00998	H6	1990	Tunisia	Faculté des sciences de Tunisie	Pepper	Capsicum	annuum		NO	NO
PM00999	H7	1990	Tunisia	Faculté des sciences de Tunisie	Pepper	Capsicum	annuum		NO	NO
PM01000	H8	1990	Tunisia	Faculté des sciences de Tunisie	Pepper	Capsicum	annuum		NO	NO
PM01001	H9	1990	Tunisia	Faculté des sciences de Tunisie	Pepper	Capsicum	annuum		NO	NO
PM01002	H10	1990	Tunisia	Faculté des sciences de Tunisie	Pepper	Capsicum	annuum		NO	NO
PM01003	H18	1990	Tunisia	Faculté des sciences de Tunisie	Pepper	Capsicum	annuum		NO	NO
PM01004	H19	1990	Tunisia	Faculté des sciences de Tunisie	Pepper	Capsicum	annuum		NO	NO
PM01005	NORAS	1990	Spain	Private individual	Pepper	Capsicum	annuum		NO	YES
PM01006	VAT	1991	France	Vilmorin ( Limagrain Hm-Clause)	Pepper	Capsicum	annuum		NO	NO
PM01007	ANTIVI	1990	France	ETABLISSEMENTS CAILLARD	Pepper	Capsicum	annuum		NO	YES
PM01008	MAROC 1	1990	Morocco	INRAE	Pepper	Capsicum	annuum		NO	NO
PM01009	MAROC 2	1990	Morocco	INRAE	Pepper	Capsicum	annuum		NO	NO
PM01010	ESPECIAL	1990	Cuba	Instituto de Investigaciones Hortícolas Liliana Dimitrova,	Pepper	Capsicum	annuum		NO	NO
PM01011	E5/3	1990	Cuba	Instituto de Investigaciones Hortícolas Liliana Dimitrova,	Pepper	Capsicum	annuum		NO	NO
PM01012	SC81	1990	Cuba	Instituto de Investigaciones Hortícolas Liliana Dimitrova,	Pepper	Capsicum	annuum		NO	NO
PM01013	FLORA	1990	Cuba	Instituto de Investigaciones Hortícolas Liliana Dimitrova,	Pepper	Capsicum	annuum		NO	NO
PM01014	BOUSSO 2	1990	Chad	INRAE	Pepper	Capsicum	annuum		NO	NO
PM01015	BOUSSO 3	1990	Chad	INRAE	Pepper	Capsicum	annuum		NO	YES
PM01016	BOUSSO 4	1990	Chad	INRAE	Pepper	Capsicum	annuum		NO	YES
PM01017	BOUSSO 5	1990	Chad	INRAE	Pepper	Capsicum	annuum		NO	YES
PM01018	BOUSSO 6	1990	Chad	INRAE	Pepper	Capsicum	annuum		NO	NO
PM01019	BOUSSO 7	1990	Chad	INRAE	Pepper	Capsicum	annuum		NO	NO
PM01020	PILI PILI HAOUSSA	1990	Chad	INRAE	Pepper	Capsicum	frutescens		NO	YES
PM01021	BOUSSO 8	1990	Chad	INRAE	Pepper	Capsicum	annuum		NO	NO
PM01022	CRISTAL BLANCO	1990	Chile	Unknown	Pepper	Capsicum	baccatum		NO	NO
PM01023	CRISTAL NEGRO	1990	Chile	Private individual	Pepper	Capsicum	baccatum		NO	YES
PM01024	CACHO DE CABRA	1990	Chile	Private individual	Pepper	Capsicum	annuum		NO	YES
PM01026	MUARAPATE ROJO	1990	Bolivia (Plurinational State of)	Private individual	Pepper	Capsicum	baccatum		NO	NO
PM01027	MUARAPATE NEGRO	1990	Bolivia (Plurinational State of)	Private individual	Pepper	Capsicum	baccatum		NO	NO
PM01028	PUTAMADRE	1990	Bolivia (Plurinational State of)	Private individual	Pepper	Capsicum	baccatum		NO	YES
PM01029	SUCRE AMARILLO	1990	Bolivia (Plurinational State of)	Private individual	Pepper	Capsicum	baccatum		NO	YES
PM01030	PERUANO 1	1990	Bolivia (Plurinational State of)	Private individual	Pepper	Capsicum	baccatum		NO	YES
PM01031	CUZCO ROJO	1990	Bolivia (Plurinational State of)	Private individual	Pepper	Capsicum	baccatum		NO	YES
PM01032	CUZCO NEGRO	1990	Bolivia (Plurinational State of)	Private individual	Pepper	Capsicum	chinense		NO	NO
PM01033	SUCRE NEGRO	1990	Bolivia (Plurinational State of)	Private individual	Pepper	Capsicum	baccatum		NO	YES
PM01034	PERUANO 2	1990	Bolivia (Plurinational State of)	Private individual	Pepper	Capsicum	baccatum		NO	NO
PM01036	PBC518 (INDE:PSP11)	1990	India	AVRDC TAIWAN	Pepper	Capsicum	annuum		NO	NO
PM01037	LARGE CHERRY	1990	United States of America	BURPEE	Pepper	Capsicum	annuum		NO	YES
PM01038	PLAO18-CAPRIGLIO	1991	Italy	University of TURIN ITALIA	Pepper	Capsicum	annuum		NO	YES
PM01039	PLAO40-SPAGNOLIN	1991	Italy	University of TURIN ITALIA	Pepper	Capsicum	annuum		NO	YES
PM01040	PLAO58-CONICUM	1991	Italy	University of TURIN ITALIA	Pepper	Capsicum	annuum		NO	NO
PM01041	PLOO71-CUNEO	1991	Italy	University of TURIN ITALIA	Pepper	Capsicum	annuum		NO	NO
PM01042	PEA114	1991	Morocco	University of TURIN ITALIA	Pepper	Capsicum	annuum		NO	NO
PM01043	PEA116	1991	Morocco	University of TURIN ITALIA	Pepper	Capsicum	annuum		NO	NO
PM01044	PEA171-PIMENTA DE CHEIN	1991	Brazil	University of TURIN ITALIA	Pepper	Capsicum	chinense		NO	NO
PM01045	PEA172-MALAGUETA	1991	Brazil	University of TURIN ITALIA	Pepper	Capsicum	annuum		NO	NO
PM01046	PEA176-CAMPRIDA AIDIDA	1991	Brazil	University of TURIN ITALIA	Pepper	Capsicum	baccatum		NO	NO
PM01047	PEA177-PICANTE CAIENA	1991	Brazil	University of TURIN ITALIA	Pepper	Capsicum	chinense		NO	NO
PM01049	BOUSSO 9	1990	Chad	INRAE	Pepper	Capsicum	chinense		NO	YES
PM01050	BOUSSO 10	1990	Chad	INRAE	Pepper	Capsicum	chinense		NO	NO
PM01051	GOLDEN CALWONDER CALIFORNIA	1991	United States of America	INRAE	Pepper	Capsicum	annuum		NO	YES
PM01053	DOUX LONG LOMBARDIE	1991	Italy	INRAE	Pepper	Capsicum	annuum		NO	YES
PM01054	SWEET CHOCOLATE	1991	United States of America	INRAE	Pepper	Capsicum	annuum		NO	YES
PM01055	KARLO	1991	United States of America	INRAE	Pepper	Capsicum	annuum		NO	YES
PM01056	CARIBBEAN MONTEGO	1991	Jamaica	INRAE	Pepper	Capsicum	annuum		NO	NO
PM01057	KODAR	1991	India	INRAE	Pepper	Capsicum	annuum		NO	NO
PM01058	ADONI	1991	India	INRAE	Pepper	Capsicum	annuum		NO	NO
PM01059	GUDUR	1991	India	INRAE	Pepper	Capsicum	annuum		NO	NO
PM01060	PI123474	1991	China	Vilmorin ( Limagrain Hm-Clause)	Pepper	Capsicum	annuum		NO	NO
PM01061	PI195301	1991	China	Vilmorin ( Limagrain Hm-Clause)	Pepper	Capsicum	frutescens		NO	NO
PM01062	BACCATUM DOUX	1991	Cuba	INRAE	Pepper	Capsicum	baccatum		NO	YES
PM01063	CHINENSE DOUX	1991	Cuba	INRAE	Pepper	Capsicum	chinense		NO	YES
PM01064	CALCUTTA	1991	India	INRAE	Pepper	Capsicum	frutescens		NO	NO
PM01065	DELHI	1991	India	INRAE	Pepper	Capsicum	frutescens		NO	NO
PM01066	CHILE DE ARBOL	1991	Mexico	Private individual	Pepper	Capsicum	annuum		NO	YES
PM01067	HUIXTAN	1991	Mexico	Private individual	Pepper	Capsicum	annuum		NO	NO
PM01068	TAPANALA	1991	Mexico	Private individual	Pepper	Capsicum	annuum		NO	NO
PM01069	POCHUTLA	1991	Mexico	Private individual	Pepper	Capsicum	annuum		NO	NO
PM01070	ARRIAGA	1991	Mexico	Private individual	Pepper	Capsicum	annuum		NO	NO
PM01071	PAREDON	1991	Mexico	Private individual	Pepper	Capsicum	annuum		NO	YES
PM01072	LAMU VR2	1991	France	Vilmorin ( Limagrain Hm-Clause)	Pepper	Capsicum	annuum		NO	NO
PM01073	VAMU VR2	1991	France	Vilmorin ( Limagrain Hm-Clause)	Pepper	Capsicum	annuum		NO	NO
PM01074	HRF F1	1991	Hungary	Private individual	Pepper	Capsicum	annuum		NO	NO
PM01075	HO F1	1991	Hungary	Private individual	Pepper	Capsicum	annuum		NO	NO
PM01076	BALATON F1	1991	Hungary	Private individual	Pepper	Capsicum	annuum		NO	NO
PM01077	hybride naturel	1991	France	Unknown	Pepper	Capsicum	annuum x chacoense	WILD	NO	NO
PM01079	NUMEX CONQUISTADOR	1992	United States of America	NEW MEXICO STATE UNIVERSITY	Pepper	Capsicum	annuum		NO	NO
PM01080	NUMEX SWEET	1992	United States of America	NEW MEXICO STATE UNIVERSITY	Pepper	Capsicum	annuum		NO	NO
PM01081	NUMEX JOE E.PARKER	1992	United States of America	NEW MEXICO STATE UNIVERSITY	Pepper	Capsicum	annuum		NO	NO
PM01082	CAJUN IA	1992	United States of America	Private individual	Pepper	Capsicum	annuum		NO	NO
PM01083	CAJUN ZA-PETO INCREASE	1992	United States of America	Private individual	Pepper	Capsicum	annuum		NO	NO
PM01084	PI152225	1992	Unknown	Private individual	Pepper	Capsicum	chinense		YES	YES
PM01085	PI159236	1992	Unknown	Private individual	Pepper	Capsicum	chinense		YES	YES
PM01086	SERANG N°1106	1992	Indonesia	Lembang Horticultural Research Institute Jalan Tangkuban Parahu,	Pepper	Capsicum	annuum		NO	NO
PM01087	TANGGERANG N°1912	1992	Indonesia	Lembang Horticultural Research Institute Jalan Tangkuban Parahu,	Pepper	Capsicum	annuum		NO	NO
PM01088	BOJONEGRO N°1125	1992	Indonesia	Lembang Horticultural Research Institute Jalan Tangkuban Parahu,	Pepper	Capsicum	annuum		NO	NO
PM01089	KATMANDOU	1992	Nepal	INRAE	Pepper	Capsicum	annuum		NO	NO
PM01090	BAGDAON	1992	Nepal	INRAE	Pepper	Capsicum	annuum		NO	NO
PM01091	BIRENDRAGAR TIRAï 1	1992	Nepal	INRAE	Pepper	Capsicum	annuum		NO	NO
PM01092	BIRENDRAGAR TERAï 2	1992	Nepal	INRAE	Pepper	Capsicum	annuum		NO	NO
PM01093	CHILE HABANERO (MERIDA)	1992	Mexico	INRAE	Pepper	Capsicum	chinense		NO	NO
PM01094	CHILE DULCE (MERIDA)	1992	Mexico	INRAE	Pepper	Capsicum	annuum		NO	NO
PM01095	CHILE CATIQUES (MERIDA)	1992	Mexico	INRAE	Pepper	Capsicum	annuum		NO	NO
PM01096	CHILE CATIQUES 2 (MERIDA)	1992	Mexico	INRAE	Pepper	Capsicum	annuum		NO	NO
PM01097	SAN CRISTOBAL LAS CASAS	1992	Mexico	INRAE	Pepper	Capsicum	pubescens		NO	NO
PM01098	CHILE DOS CALDOS (SAN CRISTOBAL)	1992	Mexico	INRAE	Pepper	Capsicum	annuum		NO	NO
PM01099	CHILE SIETE CALDOS (SAN CRISTOBAL)	1992	Mexico	INRAE	Pepper	Capsicum	frutescens		NO	NO
PM01100	CHAY ANGOLANO	1992	Cuba	Instituto de Investigaciones Hortícolas Liliana Dimitrova,	Pepper	Capsicum	annuum		NO	NO
PM01101	LILIANA 330	1992	Cuba	Instituto de Investigaciones Hortícolas Liliana Dimitrova,	Pepper	Capsicum	annuum		NO	NO
PM01102	TIT SUPER	1992	Indonesia	INRAE	Pepper	Capsicum	annuum		NO	NO
PM01103	CHILLI HYBRID1-PL2	1992	India	INRAE	Pepper	Capsicum	annuum		NO	NO
PM01104	CHILLI HYBRID1-PL3	1992	India	INRAE	Pepper	Capsicum	annuum		NO	NO
PM01105	LV.JATILABA	1992	Indonesia	INRAE	Pepper	Capsicum	annuum		NO	NO
PM01106	GUINDIA	1992	Spain	INRAE	Pepper	Capsicum	annuum		NO	YES
PM01107	KAHRAMANMARAS	1992	Turkey	INRAE	Pepper	Capsicum	annuum		NO	NO
PM01108	CHARLETTE	1992	United States of America	Pepper Research Inc.	Pepper	Capsicum	frutescens		NO	NO
PM01109	PIQUINE	1992	United States of America	Pepper Research Inc.	Pepper	Capsicum	annuum	WILD	NO	NO
PM01110	TIWARI	1992	India	Department of Vegetable Crops, Landscaping and Floriculture, Punjab Agricultural University,	Pepper	Capsicum	annuum		NO	NO
PM01111	LAICHI-4	1992	India	Department of Vegetable Crops, Landscaping and Floriculture, Punjab Agricultural University,	Pepper	Capsicum	annuum		NO	NO
PM01112	LS-III	1992	India	Department of Vegetable Crops, Landscaping and Floriculture, Punjab Agricultural University,	Pepper	Capsicum	annuum		NO	NO
PM01113	ELS-2	1992	India	Department of Vegetable Crops, Landscaping and Floriculture, Punjab Agricultural University,	Pepper	Capsicum	annuum		NO	NO
PM01114	118 H-104-10	1992	Republic of Korea	Osan Breeding Institute - CHOONG-AG-SEED CO. LTD	Pepper	Capsicum	annuum		NO	NO
PM01115	118 I-1-5-8-6	1992	Republic of Korea	Osan Breeding Institute - CHOONG-AG-SEED CO. LTD	Pepper	Capsicum	annuum		NO	NO
PM01116	135B	1992	Republic of Korea	Osan Breeding Institute - CHOONG-AG-SEED CO. LTD	Pepper	Capsicum	annuum		NO	NO
PM01117	135E	1992	Republic of Korea	Osan Breeding Institute - CHOONG-AG-SEED CO. LTD	Pepper	Capsicum	annuum		NO	NO
PM01118	135F	1992	Republic of Korea	Osan Breeding Institute - CHOONG-AG-SEED CO. LTD	Pepper	Capsicum	annuum		NO	NO
PM01119	90P19	1992	Republic of Korea	Osan Breeding Institute - CHOONG-AG-SEED CO. LTD	Pepper	Capsicum	annuum		NO	NO
PM01120	171A	1992	Republic of Korea	Osan Breeding Institute - CHOONG-AG-SEED CO. LTD	Pepper	Capsicum	annuum		NO	NO
PM01121	171D	1992	Republic of Korea	Osan Breeding Institute - CHOONG-AG-SEED CO. LTD	Pepper	Capsicum	annuum		NO	NO
PM01122	171R	1992	Republic of Korea	Osan Breeding Institute - CHOONG-AG-SEED CO. LTD	Pepper	Capsicum	annuum		NO	NO
PM01123	276F	1992	Republic of Korea	Osan Breeding Institute - CHOONG-AG-SEED CO. LTD	Pepper	Capsicum	annuum		NO	NO
PM01124	2174B	1992	Republic of Korea	Osan Breeding Institute - CHOONG-AG-SEED CO. LTD	Pepper	Capsicum	annuum		NO	NO
PM01125	2112B58	1992	Republic of Korea	Osan Breeding Institute - CHOONG-AG-SEED CO. LTD	Pepper	Capsicum	annuum		NO	NO
PM01126	2171A	1992	Republic of Korea	Osan Breeding Institute - CHOONG-AG-SEED CO. LTD	Pepper	Capsicum	annuum		NO	NO
PM01127	PE80	1992	Republic of Korea	Osan Breeding Institute - CHOONG-AG-SEED CO. LTD	Pepper	Capsicum	annuum		NO	NO
PM01128	PE81	1992	Republic of Korea	Osan Breeding Institute - CHOONG-AG-SEED CO. LTD	Pepper	Capsicum	annuum		NO	NO
PM01130	HMONG ROUGE	1992	French Guiana	Private individual	Pepper	Capsicum	chinense		NO	NO
PM01131	HMONG ROUGE	1992	French Guiana	Private individual	Pepper	Capsicum	chinense		NO	NO
PM01132	TÂN CHÂU	1993	Viet Nam	INRAE	Pepper	Capsicum	annuum		NO	NO
PM01133	LONG PHÚ	1993	Viet Nam	INRAE	Pepper	Capsicum	annuum		NO	NO
PM01134	C.ANNUUM Ex 281416	1993	Philippines	Vilmorin ( Limagrain Hm-Clause)	Pepper	Capsicum	annuum		NO	NO
PM01135	APOPA	1993	Nicaragua	Vilmorin ( Limagrain Hm-Clause)	Pepper	Capsicum	annuum		NO	NO
PM01136	C.PUBESCENS 33373	1993	Indonesia	Vilmorin ( Limagrain Hm-Clause)	Pepper	Capsicum	pubescens		NO	NO
PM01137	PERMAGREEN BELL (1818)	1993	Israel	Private individual	Pepper	Capsicum	annuum		NO	NO
PM01138	BELL (1957)	1993	Israel	Private individual	Pepper	Capsicum	annuum		NO	NO
PM01139	3872	1993	Israel	Private individual	Pepper	Capsicum	annuum		NO	NO
PM01140	3898	1993	Israel	Private individual	Pepper	Capsicum	annuum		NO	NO
PM01141	3899	1993	Israel	Private individual	Pepper	Capsicum	annuum		NO	NO
PM01142	3974	1993	Israel	Private individual	Pepper	Capsicum	annuum		NO	NO
PM01143	2049-3	1993	Israel	Private individual	Pepper	Capsicum	annuum		NO	NO
PM01144	2060-10	1993	Israel	Private individual	Pepper	Capsicum	annuum		NO	NO
PM01145	11985-3 pl.24	1993	Israel	Private individual	Pepper	Capsicum	annuum		NO	NO
PM01146	U991/714	1993	Hungary	Private individual	Pepper	Capsicum	annuum		NO	NO
PM01147	U1254/712	1993	Hungary	Private individual	Pepper	Capsicum	annuum		NO	NO
PM01148	ET1147/792	1993	Hungary	Private individual	Pepper	Capsicum	annuum		NO	NO
PM01149	ET1147/795	1993	Hungary	Private individual	Pepper	Capsicum	annuum		NO	NO
PM01150	U1187/690	1993	Hungary	Private individual	Pepper	Capsicum	annuum		NO	NO
PM01151	U771/663	1993	Hungary	Private individual	Pepper	Capsicum	annuum		NO	NO
PM01152	U972/646	1993	Hungary	Private individual	Pepper	Capsicum	annuum		NO	NO
PM01153	TL283/336	1993	Hungary	Private individual	Pepper	Capsicum	annuum		NO	NO
PM01154	TL299/347	1993	Hungary	Private individual	Pepper	Capsicum	annuum		NO	NO
PM01155	B56/524	1993	Hungary	Private individual	Pepper	Capsicum	annuum		NO	NO
PM01156	7204.97P	1993	Spain	Polytechnical University of Valencia	Pepper	Capsicum	chinense		NO	NO
PM01157	C.PUBESCENS 54P	1993	Peru	Polytechnical University of Valencia	Pepper	Capsicum	pubescens		NO	NO
PM01158	LAMURO	1993	France	Vilmorin ( Limagrain Hm-Clause)	Pepper	Capsicum	annuum		NO	NO
PM01159	LAMUGA	1993	France	Vilmorin ( Limagrain Hm-Clause)	Pepper	Capsicum	annuum		NO	NO
PM01160	TAMBEL2-8-3	1993	Cabo Verde	Private individual	Pepper	Capsicum	annuum		NO	NO
PM01161	TAMBEL2-29-3	1993	Cabo Verde	Private individual	Pepper	Capsicum	annuum		NO	NO
PM01162	CHOCOLATE	1993	Mexico	Colegio de Postgraduades - Centra de Genetica Montecillo-Chapingo	Pepper	Capsicum	frutescens		NO	NO
PM01163	SUCHIAPA	1993	Mexico	Colegio de Postgraduades - Centra de Genetica Montecillo-Chapingo	Pepper	Capsicum	frutescens		NO	NO
PM01164	DONOR	1993	Italy	INRAE	Pepper	Capsicum	annuum		NO	NO
PM01165	SRI LANKA	1993	Sri Lanka	Private individual	Pepper	Capsicum	annuum		NO	NO
PM01166	EARLY CALIFORNIA WONDER	1993	United States of America	CNRS	Pepper	Capsicum	annuum		YES	YES
PM01167	Early California Wonder 20 R	1993	United States of America	CNRS	Pepper	Capsicum	annuum		YES	YES
PM01168	Early California Wonder 30 R	1993	United States of America	CNRS	Pepper	Capsicum	annuum		YES	YES
PM01169	C.Pubescens 17280	1993	Indonesia	Vilmorin ( Limagrain Hm-Clause)	Pepper	Capsicum	pubescens		NO	NO
PM01170	HAITI	1993	Haiti	INRAE	Pepper	Capsicum	annuum		NO	NO
PM01171	C.GALAPOGENSE : 11918 pl 4	1993	Ecuador	Vilmorin ( Limagrain Hm-Clause)	Pepper	Capsicum	galapagoense	WILD	NO	NO
PM01172	12 HD	1993	Cuba	Instituto de Investigaciones Hortícolas Liliana Dimitrova,	Pepper	Capsicum	annuum		NO	NO
PM01173	16 HD	1993	Cuba	Instituto de Investigaciones Hortícolas Liliana Dimitrova,	Pepper	Capsicum	annuum		NO	NO
PM01174	60 HD	1993	Cuba	Instituto de Investigaciones Hortícolas Liliana Dimitrova,	Pepper	Capsicum	annuum		NO	NO
PM01175	GOGOCAR	1993	Romania	Private individual	Pepper	Capsicum	annuum		NO	NO
PM01176	SINWA TAMUR RIVER	1993	Nepal	Private individual	Pepper	Capsicum	frutescens		NO	NO
PM01177	HOT PEPPER	1994	Thailand	CHIA TAI CO	Pepper	Capsicum	annuum		NO	NO
PM01178	HOT CHILLI	1994	Thailand	CHIA TAI CO	Pepper	Capsicum	annuum		NO	NO
PM01179	SHATA	1994	Sudan	INRAE	Pepper	Capsicum	annuum		NO	NO
PM01180	CAMPO	1994	Cameroon	Private individual	Pepper	Capsicum	annuum		NO	NO
PM01181	BEER SHEVA	1994	Israel	INRAE	Pepper	Capsicum	annuum		NO	NO
PM01182	NEGEV	1994	Israel	INRAE	Pepper	Capsicum	annuum		NO	NO
PM01183	EN GEDI	1994	Israel	INRAE	Pepper	Capsicum	annuum		NO	NO
PM01184	MINGXI	1994	China	Private individual	Pepper	Capsicum	frutescens		NO	NO
PM01186	KATMANDOU	1994	Nepal	INRAE	Pepper	Capsicum	annuum		NO	NO
PM01187	CHANGMAI	1994	Thailand	INRAE	Pepper	Capsicum	annuum		NO	NO
PM01188	LA PAZ	1994	Bolivia (Plurinational State of)	INRAE	Pepper	Capsicum	cardenasii	WILD	NO	NO
PM01189	QUILACOLLO	1994	Bolivia (Plurinational State of)	INRAE	Pepper	Capsicum	cardenasii	WILD	NO	NO
PM01190	AJI ROJO	1994	Bolivia (Plurinational State of)	INRAE	Pepper	Capsicum	baccatum		NO	NO
PM01191	AJI AMARILLO	1994	Bolivia (Plurinational State of)	INRAE	Pepper	Capsicum	baccatum		NO	NO
PM01192	SANTA ROSA	1994	Bolivia (Plurinational State of)	INRAE	Pepper	Capsicum	chinense		NO	NO
PM01193	RURRENABAQUE	1994	Bolivia (Plurinational State of)	INRAE	Pepper	Capsicum	frutescens		NO	NO
PM01194	SAINT REMY 1	1994	France	INRAE	Pepper	Capsicum	annuum		YES	YES
PM01196	TOPEPO	1994	Italy	INRAE	Pepper	Capsicum	annuum		NO	NO
PM01197	MUJAROSKA	1994	Poland	INRAE	Pepper	Capsicum	annuum		NO	YES
PM01198	PAPRIKA OSTRA	1994	Poland	INRAE	Pepper	Capsicum	annuum		NO	NO
PM01199	TANZANIE 1	1994	United Republic of Tanzania	Private individual	Pepper	Capsicum	annuum		NO	NO
PM01200	TANZANIE 2	1994	United Republic of Tanzania	Private individual	Pepper	Capsicum	chinense		NO	NO
PM01201	HOCHET	1994	France	Private individual	Pepper	Capsicum	annuum		NO	NO
PM01202	PENIS SHAPE	1994	France	INRAE	Pepper	Capsicum	annuum		YES	YES
PM01203	CHRISMAS BELL	1995	United States of America	NEW MEXICO STATE UNIVERSITY	Pepper	Capsicum	baccatum		NO	NO
PM01204	NUMEX TWILIGHT	1995	United States of America	NEW MEXICO STATE UNIVERSITY	Pepper	Capsicum	annuum		NO	YES
PM01205	NUMEX BIGJIM	1995	United States of America	NEW MEXICO STATE UNIVERSITY	Pepper	Capsicum	annuum		NO	NO
PM01206	ESPANOLA IMPROVED	1995	United States of America	NEW MEXICO STATE UNIVERSITY	Pepper	Capsicum	annuum		NO	NO
PM01207	SANDIA	1995	United States of America	NEW MEXICO STATE UNIVERSITY	Pepper	Capsicum	annuum		NO	NO
PM01208	NUMEX MIRASOL	1995	United States of America	NEW MEXICO STATE UNIVERSITY	Pepper	Capsicum	annuum		NO	NO
PM01209	SALMON	1995	Réunion	Private individual	Pepper	Capsicum	annuum		NO	NO
PM01210	POIVRON D'AMPUIS	1995	France	Chambre d'Agriculture du Rhône	Pepper	Capsicum	annuum		YES	YES
PM01211	PI197409	1994	France	CNRS	Pepper	Capsicum	annuum		NO	NO
PM01212	TANT C 1	1995	India	ETABLISSEMENTS CAILLARD	Pepper	Capsicum	annuum		NO	NO
PM01213	RKIII	1995	Hungary	Private individual	Pepper	Capsicum	annuum		NO	NO
PM01214	GREYGO	1995	Hungary	Private individual	Pepper	Capsicum	annuum		NO	NO
PM01215	BELDI Y. LEV	1995	Tunisia	Laboratoire de ressources génétiques Selektsijne,	Pepper	Capsicum	annuum		NO	NO
PM01216	EX HD(YWx702)11	1995	France	Unknown	Pepper	Capsicum	annuum		NO	NO
PM01217	KORBA	1995	Tunisia	INRAE	Pepper	Capsicum	annuum		NO	NO
PM01218	PETIT PIMENT A FARCIR	1995	France	INRAE	Pepper	Capsicum	annuum		NO	YES
PM01219	DURBAR	1995	Nepal	Private individual	Pepper	Capsicum	frutescens		NO	NO
PM01220	THAMEL	1995	Nepal	Private individual	Pepper	Capsicum	chinense		NO	YES
PM01221	D'JBEL SARHRO	1996	Morocco	INRAE	Pepper	Capsicum	annuum		NO	NO
PM01222	GALRON	1996	Israel	Private individual	Pepper	Capsicum	annuum		NO	NO
PM01223	SHALHEVET	1998	Israel	Private individual	Pepper	Capsicum	annuum		NO	NO
PM01224	LEHAVA	1998	Israel	Private individual	Pepper	Capsicum	annuum		NO	NO
PM01225	LIFOU	1996	New Caledonia	Private individual	Pepper	Capsicum	frutescens		NO	NO
PM01226	WACO	1995	United States of America	Private individual	Pepper	Capsicum	annuum	WILD	NO	NO
PM01227	MAGUY	1996	Guadeloupe	Private individual	Pepper	Capsicum	chinense		NO	NO
PM01228	MUTANT CHLOROPHILLIEN dans HDA 702- 6	1996	France	INRAE	Pepper	Capsicum	annuum		NO	NO
PM01229	ISLA PALO SECO	1996	Costa Rica	Private individual	Pepper	Capsicum	chinense		NO	NO
PM01230	PUNTARENAS PARRITAS	1996	Costa Rica	Private individual	Pepper	Capsicum	frutescens		NO	NO
PM01231	CHOURBADJIISKI	1996	Bulgaria	Unknown	Pepper	Capsicum	annuum		NO	NO
PM01232	BELDI - Pvr4 - 13-1	1996	Tunisia	INRAE	Pepper	Capsicum	annuum		NO	NO
PM01233	ANAIS 17-12-3-2	1996	Guadeloupe	INRAE	Pepper	Capsicum	annuum		NO	NO
PM01234	COCHIN	1996	India	INRAE	Pepper	Capsicum	annuum		NO	NO
PM01235	LHASSA	1996	China	INRAE	Pepper	Capsicum	annuum		NO	NO
PM01236	BARIO	1996	Malaysia	INRAE	Pepper	Capsicum	frutescens		NO	NO
PM01237	Piment de Thaïlande	1996	Thailand	Private individual	Pepper	Capsicum	annuum		NO	NO
PM01238	Piment Ile maurice	1996	Mauritius	Private individual	Pepper	Capsicum	annuum		NO	NO
PM01239	NEPAL	1996	Nepal	Private individual	Pepper	Capsicum	annuum	WILD	NO	NO
PM01240	CAPELA	1997	Cabo Verde	Private individual	Pepper	Capsicum	annuum		NO	NO
PM01241	JAÏPUR - PENDJAB	1997	India	INRAE	Pepper	Capsicum	annuum		NO	NO
PM01242	G1	1996	India	SLUIS & GROOT	Pepper	Capsicum	annuum		NO	NO
PM01243	G4	1996	India	SLUIS & GROOT	Pepper	Capsicum	annuum		NO	NO
PM01244	G5	1996	Indonesia	SLUIS & GROOT	Pepper	Capsicum	annuum		NO	NO
PM01245	BIBOR	1997	Hungary	Department for Natural Resources, Research and Biotechnology Division, Ministry of Agriculture and Rural Development,	Pepper	Capsicum	annuum		NO	NO
PM01246	NAPFENY	1997	Hungary	Department for Natural Resources, Research and Biotechnology Division, Ministry of Agriculture and Rural Development,	Pepper	Capsicum	annuum		NO	NO
PM01247	MIHALYTELKI	1997	Hungary	Department for Natural Resources, Research and Biotechnology Division, Ministry of Agriculture and Rural Development,	Pepper	Capsicum	annuum		NO	NO
PM01248	FESZTIVAL	1997	Hungary	Department for Natural Resources, Research and Biotechnology Division, Ministry of Agriculture and Rural Development,	Pepper	Capsicum	annuum		NO	NO
PM01249	VIKTORIA	1997	Hungary	Department for Natural Resources, Research and Biotechnology Division, Ministry of Agriculture and Rural Development,	Pepper	Capsicum	annuum		NO	NO
PM01250	PIMIENTO DE SUDAFRICA	1997	Spain	Department for Natural Resources, Research and Biotechnology Division, Ministry of Agriculture and Rural Development,	Pepper	Capsicum	annuum		NO	NO
PM01251	JARIZA	1997	Spain	Department for Natural Resources, Research and Biotechnology Division, Ministry of Agriculture and Rural Development,	Pepper	Capsicum	annuum		NO	YES
PM01252	JARANDA	1997	Spain	Department for Natural Resources, Research and Biotechnology Division, Ministry of Agriculture and Rural Development,	Pepper	Capsicum	annuum		NO	YES
PM01253	NEGRAL	1997	Spain	Department for Natural Resources, Research and Biotechnology Division, Ministry of Agriculture and Rural Development,	Pepper	Capsicum	annuum		NO	YES
PM01254	JEROMIN	1997	Spain	Department for Natural Resources, Research and Biotechnology Division, Ministry of Agriculture and Rural Development,	Pepper	Capsicum	annuum		NO	YES
PM01255	Early California Wonder 10R	1997	United States of America	NEW MEXICO STATE UNIVERSITY	Pepper	Capsicum	annuum		YES	YES
PM01256	ANTILLES	1997	Guadeloupe	INRAE	Pepper	Capsicum	chinense		NO	YES
PM01257	SHANGAI	1997	China	INRAE	Pepper	Capsicum	annuum		NO	NO
PM01258	EMEISHAN 2	1997	China	INRAE	Pepper	Capsicum	annuum		NO	NO
PM01259	CUBANELLE	1997	United States of America	GEVES	Pepper	Capsicum	annuum		NO	NO
PM01260	SWEET BANANA	1997	United States of America	GEVES	Pepper	Capsicum	annuum		NO	NO
PM01261	E108bis	1962	unknown	Unknown	Pepper	Capsicum	annuum		NO	NO
PM01262	PI370005	1983	India	Unknown	Pepper	Capsicum	frutescens		NO	NO
PM01263	PI260438	1997	Bolivia (Plurinational State of)	Unknown	Pepper	Capsicum	chinense		NO	NO
PM01264	PI439383	1997	Peru	Unknown	Pepper	Capsicum	chinense		NO	NO
PM01265	PI260429 (HDV42)	1983	Argentina	USDA	Pepper	Capsicum	chacoense	WILD	NO	YES
PM01266	PI260429	1983	Argentina	USDA	Pepper	Capsicum	chacoense	WILD	NO	NO
PM01267	PI260426	1983	Argentina	USDA	Pepper	Capsicum	chacoense	WILD	NO	NO
PM01268	PI260433	1983	Bolivia (Plurinational State of)	USDA	Pepper	Capsicum	chacoense	WILD	NO	YES
PM01269	PI260435	1983	Bolivia (Plurinational State of)	USDA	Pepper	Capsicum	chacoense	WILD	NO	NO
PM01270	PI439414	1983	Argentina	USDA	Pepper	Capsicum	chacoense	WILD	NO	NO
PM01271	PI439415	1983	Bolivia (Plurinational State of)	USDA	Pepper	Capsicum	chacoense	WILD	NO	NO
PM01272	PI260431	1983	Bolivia (Plurinational State of)	USDA	Pepper	Capsicum	chacoense	WILD	NO	NO
PM01273	PI260437	1983	Bolivia (Plurinational State of)	USDA	Pepper	Capsicum	chacoense	WILD	NO	NO
PM01274	Ex PI273429	2004	United States of America	Unknown	Pepper	Capsicum	annuum	WILD	NO	NO
PM01275	Ex PI439413-1 Ex CHA13	2003	France	Unknown	Pepper	Capsicum	annuum		NO	NO
PM01276	Ex PI439413-3 - Ex CHA 14	1997	Argentina	Unknown	Pepper	Capsicum	annuum		NO	NO
PM01277	PI238061	1997	Bolivia (Plurinational State of)	USDA	Pepper	Capsicum	baccatum	WILD	NO	NO
PM01278	PI260533	1997	Brazil	USDA	Pepper	Capsicum	baccatum		NO	NO
PM01279	PI260567	1997	Bolivia (Plurinational State of)	USDA	Pepper	Capsicum	baccatum		NO	NO
PM01280	PI281306	1997	Bolivia (Plurinational State of)	USDA	Pepper	Capsicum	baccatum		NO	NO
PM01281	PI413669	1997	Colombia	USDA	Pepper	Capsicum	baccatum		NO	NO
PM01282	PI439359	1983	Argentina	USDA	Pepper	Capsicum	baccatum		NO	NO
PM01283	PI439360	1997	Bolivia (Plurinational State of)	USDA	Pepper	Capsicum	baccatum		NO	NO
PM01284	PI439361	1997	Bolivia (Plurinational State of)	USDA	Pepper	Capsicum	baccatum		NO	NO
PM01285	PI439362	1997	Bolivia (Plurinational State of)	USDA	Pepper	Capsicum	baccatum		NO	NO
PM01286	PI439363	1997	Bolivia (Plurinational State of)	USDA	Pepper	Capsicum	baccatum		NO	NO
PM01287	PI439364	1997	Brazil	USDA	Pepper	Capsicum	baccatum		NO	NO
PM01288	PI439365	1997	Brazil	USDA	Pepper	Capsicum	baccatum		NO	NO
PM01289	PI439366	1997	Brazil	USDA	Pepper	Capsicum	baccatum		NO	NO
PM01290	PI439367	1997	Brazil	USDA	Pepper	Capsicum	baccatum		NO	NO
PM01291	PI439368	1997	Brazil	USDA	Pepper	Capsicum	baccatum		NO	NO
PM01292	PI439369	1997	Bulgaria	USDA	Pepper	Capsicum	baccatum		NO	NO
PM01293	PI439370	1997	Bulgaria	USDA	Pepper	Capsicum	baccatum		NO	NO
PM01294	PI439371	1997	Chile	USDA	Pepper	Capsicum	baccatum		NO	NO
PM01295	PI439372	1997	Chile	USDA	Pepper	Capsicum	baccatum		NO	NO
PM01296	PI439373	1997	Costa Rica	USDA	Pepper	Capsicum	baccatum		NO	NO
PM01297	PI439374	1997	Costa Rica	USDA	Pepper	Capsicum	baccatum		NO	NO
PM01298	PI439375	1997	Costa Rica	USDA	Pepper	Capsicum	baccatum		NO	NO
PM01299	PI439376	1997	Ecuador	USDA	Pepper	Capsicum	baccatum		NO	NO
PM01300	PI439377	1997	Ecuador	USDA	Pepper	Capsicum	baccatum		NO	NO
PM01301	PI370004	1997	India	USDA	Pepper	Capsicum	baccatum		NO	NO
PM01302	PI439379	1997	Mexico	USDA	Pepper	Capsicum	baccatum		NO	NO
PM01303	PI439380	1997	Mexico	USDA	Pepper	Capsicum	baccatum		NO	NO
PM01304	PI439381	1997	Mexico	USDA	Pepper	Capsicum	baccatum		NO	NO
PM01305	PI439382	1997	Paraguay	USDA	Pepper	Capsicum	baccatum		NO	NO
PM01306	PI260434	1997	Bolivia (Plurinational State of)	USDA	Pepper	Capsicum	baccatum		NO	NO
PM01307	PI439384	1983	Peru	USDA	Pepper	Capsicum	baccatum		NO	NO
PM01308	PI439385	1983	Peru	USDA	Pepper	Capsicum	baccatum		NO	NO
PM01309	PI439386	1997	Peru	USDA	Pepper	Capsicum	baccatum		NO	NO
PM01310	PI439387	1997	Peru	USDA	Pepper	Capsicum	baccatum		NO	NO
PM01311	PI439388	1983	Peru	USDA	Pepper	Capsicum	baccatum		NO	NO
PM01312	PI439389	1997	Peru	USDA	Pepper	Capsicum	baccatum		NO	NO
PM01313	PI499390	1997	Peru	USDA	Pepper	Capsicum	baccatum		NO	NO
PM01314	PI439392	1983	Peru	USDA	Pepper	Capsicum	baccatum		NO	NO
PM01315	PI439393	1997	Peru	USDA	Pepper	Capsicum	baccatum		NO	NO
PM01316	PI439394	1983	Peru	USDA	Pepper	Capsicum	baccatum		NO	NO
PM01317	PI439395	1997	Peru	USDA	Pepper	Capsicum	baccatum		NO	NO
PM01318	PI439396	1997	Peru	USDA	Pepper	Capsicum	baccatum		NO	NO
PM01319	PI439397	1997	Peru	USDA	Pepper	Capsicum	baccatum		NO	NO
PM01320	PI439398	1997	Peru	USDA	Pepper	Capsicum	baccatum		NO	NO
PM01321	PI439399	1997	Peru	USDA	Pepper	Capsicum	baccatum		NO	NO
PM01322	PI439400	1997	Peru	USDA	Pepper	Capsicum	baccatum		NO	NO
PM01323	PI439401	1997	Peru	USDA	Pepper	Capsicum	baccatum		NO	NO
PM01324	PI439402	1997	Peru	USDA	Pepper	Capsicum	baccatum		NO	NO
PM01325	PI439403	1997	Peru	USDA	Pepper	Capsicum	baccatum		NO	NO
PM01326	PI439404	1997	Peru	USDA	Pepper	Capsicum	baccatum		NO	NO
PM01327	PI439405	1983	Peru	USDA	Pepper	Capsicum	baccatum		NO	NO
PM01328	PI439406	1997	Peru	USDA	Pepper	Capsicum	baccatum		NO	NO
PM01329	PI439407	1983	United States of America	USDA	Pepper	Capsicum	baccatum		NO	NO
PM01330	PI439408	1997	Uruguay	USDA	Pepper	Capsicum	baccatum		NO	NO
PM01331	PI439409	1983	Uruguay	USDA	Pepper	Capsicum	baccatum		NO	NO
PM01332	PI439410	1997	Uruguay	USDA	Pepper	Capsicum	baccatum		NO	NO
PM01333	PI439411	1997	Uruguay	USDA	Pepper	Capsicum	baccatum		NO	NO
PM01334	PI439412	1997	Venezuela (Bolivarian Republic of)	USDA	Pepper	Capsicum	baccatum		NO	NO
PM01335	SALAZIE	1997	Réunion	Private individual	Pepper	Capsicum	baccatum		NO	NO
PM01336	G 2	1997	Thailand	SLUIS & GROOT	Pepper	Capsicum	annuum		NO	NO
PM01337	G 3	1997	Thailand	SLUIS & GROOT	Pepper	Capsicum	annuum		NO	NO
PM01338	G 7	1997	Thailand	SLUIS & GROOT	Pepper	Capsicum	annuum		NO	NO
PM01339	PORTOS IG3	1997	Hungary	Department for Natural Resources, Research and Biotechnology Division, Ministry of Agriculture and Rural Development,	Pepper	Capsicum	annuum		NO	NO
PM01340	U1042/778	1997	Hungary	Department for Natural Resources, Research and Biotechnology Division, Ministry of Agriculture and Rural Development,	Pepper	Capsicum	annuum		NO	NO
PM01341	K50	1997	Hungary	Department for Natural Resources, Research and Biotechnology Division, Ministry of Agriculture and Rural Development,	Pepper	Capsicum	annuum		NO	NO
PM01342	SZ80 (= szegedi 80 )	1997	Hungary	Department for Natural Resources, Research and Biotechnology Division, Ministry of Agriculture and Rural Development,	Pepper	Capsicum	annuum		NO	NO
PM01343	S Z 57-13	1997	Hungary	Department for Natural Resources, Research and Biotechnology Division, Ministry of Agriculture and Rural Development,	Pepper	Capsicum	annuum		NO	NO
PM01344	SZ-F-03	1997	Hungary	Department for Natural Resources, Research and Biotechnology Division, Ministry of Agriculture and Rural Development,	Pepper	Capsicum	annuum		NO	NO
PM01345	K90	1997	Hungary	Department for Natural Resources, Research and Biotechnology Division, Ministry of Agriculture and Rural Development,	Pepper	Capsicum	annuum		NO	NO
PM01346	PEREC OSTRIJ	1997	Hungary	Department for Natural Resources, Research and Biotechnology Division, Ministry of Agriculture and Rural Development,	Pepper	Capsicum	annuum		NO	NO
PM01347	VENISE 1	1997	Italy	INRAE	Pepper	Capsicum	annuum		NO	YES
PM01349	BEPPINO	1997	Italy	INRAE	Pepper	Capsicum	annuum		NO	NO
PM01350	DODOMA	1997	United Republic of Tanzania	INRAE	Pepper	Capsicum	chinense		NO	NO
PM01351	MAKAWA	1997	United Republic of Tanzania	INRAE	Pepper	Capsicum	annuum		NO	NO
PM01352	KIVUNGU 1	1997	United Republic of Tanzania	INRAE	Pepper	Capsicum	annuum		NO	NO
PM01353	KIVUNGU 2	1997	United Republic of Tanzania	INRAE	Pepper	Capsicum	annuum		NO	NO
PM01354	VOH	1997	New Caledonia	INRAE	Pepper	Capsicum	annuum		NO	NO
PM01355	SZEDEDI 178	1998	Hungary	Department for Natural Resources, Research and Biotechnology Division, Ministry of Agriculture and Rural Development,	Pepper	Capsicum	annuum		NO	NO
PM01356	SZEDEDI 179	1998	Hungary	Department for Natural Resources, Research and Biotechnology Division, Ministry of Agriculture and Rural Development,	Pepper	Capsicum	annuum		NO	NO
PM01357	KALOCSAI D601	1998	Hungary	Department for Natural Resources, Research and Biotechnology Division, Ministry of Agriculture and Rural Development,	Pepper	Capsicum	annuum		NO	NO
PM01358	KALOCSAÏ D621	1998	Hungary	Department for Natural Resources, Research and Biotechnology Division, Ministry of Agriculture and Rural Development,	Pepper	Capsicum	annuum		NO	NO
PM01359	KALOCSAI-V2	1998	Hungary	Department for Natural Resources, Research and Biotechnology Division, Ministry of Agriculture and Rural Development,	Pepper	Capsicum	annuum		NO	NO
PM01360	LAMU VR2-PER	1998	France	Vilmorin ( Limagrain Hm-Clause)	Pepper	Capsicum	annuum		NO	NO
PM01361	PYC22	1998	Malaysia	CONIC	Pepper	Capsicum	annuum		NO	NO
PM01362	Quepos	1996	Costa Rica	Private individual	Pepper	Capsicum	chinense		NO	NO
PM01363	NOTTO	1998	Senegal	INRAE	Pepper	Capsicum	chinense		NO	NO
PM01364	FATICK	1998	Senegal	Private individual	Pepper	Capsicum	frutescens		NO	NO
PM01365	SIGHUAN-CHONGQUING	1998	China	Private individual	Pepper	Capsicum	annuum		NO	NO
PM01366	CAROLINA CAYENNE PA149	1998	United States of America	University of Charleston USA	Pepper	Capsicum	annuum		NO	NO
PM01367	CHARLESTON HOT PA 195B	1998	United States of America	University of Charleston USA	Pepper	Capsicum	annuum		NO	NO
PM01368	MISS NEMAHEART PA 003	1998	United States of America	University of Charleston USA	Pepper	Capsicum	annuum		NO	NO
PM01369	RED HABANERO PA 353	1998	Mexico	University of Charleston USA	Pepper	Capsicum	annuum		NO	NO
PM01371	PA427	1998	United States of America	University of Charleston USA	Pepper	Capsicum	annuum		NO	NO
PM01372	Ex PIC8	1976	Nicaragua	Department of Agricultural Botany - University of Reading - Whiteknights -	Pepper	Capsicum	eximium	WILD	NO	NO
PM01373	Ex PM592 - PRA1	1976	Hungary	Vegetable Crops Research Institute Budapest HONGRIE	Pepper	Capsicum	eximium	WILD	NO	NO
PM01374	L 491 A	1998	Russian Federation	Majkop Research Station of Vavilov Institute URSS	Pepper	Capsicum	annuum		NO	NO
PM01375	YAROSLAV	1998	Republic of Moldova	Transnistria Institute of Agriculture MOLDAVIE	Pepper	Capsicum	annuum		NO	NO
PM01376	AV 6	1998	Israel	INRAE	Pepper	Capsicum	annuum		NO	NO
PM01377	F1 ORNEMENTAL AV 7 Blanc	1998	Israel	INRAE	Pepper	Capsicum	annuum		NO	NO
PM01378	DH LINE Déterminé	1998	Hungary	INRAE	Pepper	Capsicum	annuum		NO	NO
PM01379	CALINECZKA	1998	Poland	INRAE	Pepper	Capsicum	annuum		NO	NO
PM01382	VIOR	1998	France	Vilmorin ( Limagrain Hm-Clause)	Pepper	Capsicum	annuum		NO	NO
PM01383	MEDAL	1998	Russian Federation	INRAE	Pepper	Capsicum	annuum		NO	NO
PM01384	CAPSICUM CHINENSE 4283 / 2	1998	Hungary	Vegetable Crops Research Institute Budapest HONGRIE	Pepper	Capsicum	chinense		NO	NO
PM01385	CAPSICUM CHINENSE 4286 / 2	1998	Hungary	Vegetable Crops Research Institute Budapest HONGRIE	Pepper	Capsicum	chinense		NO	NO
PM01386	CAPSICUM CHINENSE 4291 / 1	1998	Hungary	Vegetable Crops Research Institute Budapest HONGRIE	Pepper	Capsicum	chinense		NO	NO
PM01387	CAPSICUM CHINENSE 4295 / 1	1998	Hungary	Vegetable Crops Research Institute Budapest HONGRIE	Pepper	Capsicum	chinense		NO	NO
PM01388	CAPSICUM CHINENSE 4296 / 1 -4	1998	Hungary	Vegetable Crops Research Institute Budapest HONGRIE	Pepper	Capsicum	chinense		NO	NO
PM01390	CAPSICUM CHINENSE 4309 / 1 - 4	1998	Hungary	Vegetable Crops Research Institute Budapest HONGRIE	Pepper	Capsicum	chinense		NO	NO
PM01391	CAPSICUM CHINENSE 4323 / 1	1998	Hungary	Vegetable Crops Research Institute Budapest HONGRIE	Pepper	Capsicum	chinense		NO	NO
PM01392	CAPSICUM CHINENSE 3949 / 1	1998	Hungary	Vegetable Crops Research Institute Budapest HONGRIE	Pepper	Capsicum	chinense		NO	NO
PM01393	CAPSICUM CHINENSE 4326 / 1	1998	Hungary	Vegetable Crops Research Institute Budapest HONGRIE	Pepper	Capsicum	chinense		NO	NO
PM01394	CAPSICUM FRUTESCENS 3953 / 2	1998	Hungary	Vegetable Crops Research Institute Budapest HONGRIE	Pepper	Capsicum	frutescens		NO	NO
PM01395	CAPSICUM FRUTESCENS 3955 / 1.4	1998	Hungary	Vegetable Crops Research Institute Budapest HONGRIE	Pepper	Capsicum	frutescens		NO	NO
PM01396	CAPSICUM FRUTESCENS 3963 / 1.2	1998	Hungary	Vegetable Crops Research Institute Budapest HONGRIE	Pepper	Capsicum	frutescens		NO	NO
PM01398	PIMIENTO CALAFYUCO	1998	Cuba	Instituto de Investigaciones Hortícolas Liliana Dimitrova,	Pepper	Capsicum	annuum		NO	NO
PM01399	ESPANOL 2	1998	Cuba	Instituto de Investigaciones Hortícolas Liliana Dimitrova,	Pepper	Capsicum	annuum		NO	NO
PM01400	P 709	1998	China	Private individual	Pepper	Capsicum	annuum		NO	NO
PM01401	P 1514	1998	China	Private individual	Pepper	Capsicum	annuum		NO	NO
PM01405	P 1697	1998	China	Private individual	Pepper	Capsicum	chinense		NO	NO
PM01406	HDA 801	1981	France	Unknown	Pepper	Capsicum	annuum		NO	NO
PM01407	PHYO 636	1998	France	Unknown	Pepper	Capsicum	annuum		YES	YES
PM01408	MILORD	1998	France	Unknown	Pepper	Capsicum	annuum		YES	YES
PM01409	VANIA	1984	France	Unknown	Pepper	Capsicum	annuum		NO	NO
PM01410	HDA 103	1981	France	Unknown	Pepper	Capsicum	annuum		YES	YES
PM01411	HV12	1998	France	Unknown	Pepper	Capsicum	annuum		YES	YES
PM01412	BASTIDON	1970	France	Unknown	Pepper	Capsicum	annuum		YES	YES
PM01413	PUERTO RICO WONDER	1997	Spain	Servicio de Investigatión Agraria	Pepper	Capsicum	annuum		NO	NO
PM01414	PETIT MARSEILLAIS	1998	France	GEVES	Pepper	Capsicum	annuum		YES	NO
PM01415	CHILITECPIN	1999	United States of America	NEW MEXICO STATE UNIVERSITY	Pepper	Capsicum	annuum var. glabriusculum	WILD	NO	NO
PM01416	MARIANNE	1999	Unknown	INRAE	Pepper	Capsicum	chinense		NO	NO
PM01417	HIMALAYA	1999	Nepal	Private individual	Pepper	Capsicum	annuum		NO	NO
PM01418	ALBANCAY	1999	Peru	Private individual	Pepper	Capsicum	baccatum		NO	NO
PM01419	ARICA	1998	Peru	Private individual	Pepper	Capsicum	baccatum		NO	NO
PM01420	AYACUCHO	1999	Peru	Private individual	Pepper	Capsicum	baccatum		NO	NO
PM01422	BOCA VIEJA	1999	Costa Rica	Private individual	Pepper	Capsicum	frutescens		NO	NO
PM01423	PIMENT SOUDAN	1999	Senegal	TROPICASEM SENEGAL	Pepper	Capsicum	annuum		NO	NO
PM01424	MARPHA	1999	Nepal	Private individual	Pepper	Capsicum	annuum		NO	NO
PM01425	YANTAÏ 284	1999	China	INRAE	Pepper	Capsicum	annuum		NO	NO
PM01426	YANTAÏ 985	1999	China	INRAE	Pepper	Capsicum	annuum		NO	NO
PM01427	SPONTANE GUADELOUPE	2000	Guadeloupe	INRAE	Pepper	Capsicum	frutescens	WILD	NO	NO
PM01428	ms 77013 A	2000	China	INSTITUTE OF VEGETABLES AND FLOWERS - CAAS	Pepper	Capsicum	annuum		NO	NO
PM01429	ms 77013 B ( Restaurateur de fertilité )	2000	China	INSTITUTE OF VEGETABLES AND FLOWERS - CAAS	Pepper	Capsicum	annuum		NO	NO
PM01430	PIKUTI	1999	Nepal	Private individual	Pepper	Capsicum	annuum		NO	NO
PM01431	MINI LIRA	1999	France	Unknown	Pepper	Capsicum	annuum		NO	NO
PM01432	PA 94 - 1416	1995	Netherlands	De Ruiter	Pepper	Capsicum	annuum		NO	NO
PM01433	PA 94 - 1470	1995	Netherlands	De Ruiter	Pepper	Capsicum	annuum		NO	NO
PM01434	PA 94 - 2014	1995	Netherlands	De Ruiter	Pepper	Capsicum	annuum		NO	NO
PM01435	TUNIS 95 - 14 -2	1996	Tunisia	Private individual	Pepper	Capsicum	annuum		NO	NO
PM01436	HDSC81 ( issu de PM1012 )	2000	Cuba	Unknown	Pepper	Capsicum	annuum		NO	YES
PM01437	NUMEX PINATA	2000	United States of America	NEW MEXICO STATE UNIVERSITY	Pepper	Capsicum	annuum		NO	NO
PM01438	AJI PERUANO 1	2000	Peru	Private individual	Pepper	Capsicum	baccatum		NO	NO
PM01439	VENISE 3	2000	Italy	INRAE	Pepper	Capsicum	annuum		NO	YES
PM01440	MEXICO 1	2000	Mexico	Instituto de Investigaciones Hortícolas Liliana Dimitrova,	Pepper	Capsicum	annuum		NO	NO
PM01441	MEXICO 2 A (rouge)	2000	Mexico	Instituto de Investigaciones Hortícolas Liliana Dimitrova,	Pepper	Capsicum	annuum		NO	NO
PM01442	MEXICO 3	2000	Mexico	Instituto de Investigaciones Hortícolas Liliana Dimitrova,	Pepper	Capsicum	annuum		NO	NO
PM01443	NARVAL	unknown	Guadeloupe	Unknown	Pepper	Capsicum	annuum		NO	NO
PM01444	UBUD -BALI 1	2000	Indonesia	INRAE	Pepper	Capsicum	annuum		NO	NO
PM01445	TOM 4	2000	France	Unknown	Pepper	Capsicum	annuum		NO	NO
PM01446	NEW HALFA 1	2000	Sudan	INRAE	Pepper	Capsicum	annuum		NO	NO
PM01447	MANU	2000	Réunion	Private individual	Pepper	Capsicum	frutescens		NO	NO
PM01448	SAMKA	1982	France	Unknown	Pepper	Capsicum	annuum		NO	NO
PM01449	CHIKA 86 - 25 - 13 - 1 - 1	1986	France	Unknown	Pepper	Capsicum	annuum		NO	NO
PM01450	SIRKA 15 - 3 - 2	1986	France	Unknown	Pepper	Capsicum	annuum		NO	NO
PM01451	SIGARETTA	2000	Italy	Vilmorin ( Limagrain Hm-Clause)	Pepper	Capsicum	annuum		NO	NO
PM01452	DULCE ITALIANO	2000	Italy	Gautier	Pepper	Capsicum	annuum		YES	NO
PM01453	FLORINIS	2000	Greece	GEVES	Pepper	Capsicum	annuum		NO	NO
PM01454	BLANC d'Espagne	2000	Spain	Vilmorin ( Limagrain Hm-Clause)	Pepper	Capsicum	annuum		NO	NO
PM01455	GROSSO DI VOGHERA	2000	Italy	Vilmorin ( Limagrain Hm-Clause)	Pepper	Capsicum	annuum		NO	NO
PM01456	CLARA	2000	Cabo Verde	Private individual	Pepper	Capsicum	annuum		NO	NO
PM01457	PRIMOR	2000	Cabo Verde	Private individual	Pepper	Capsicum	annuum		NO	NO
PM01458	14 ROC	2001	unknown	AVRDC TAIWAN	Pepper	Capsicum	annuum		NO	NO
PM01459	7ROC	2001	unknown	AVRDC TAIWAN	Pepper	Capsicum	annuum		NO	NO
PM01460	SIKASSO	2001	Mali	INRAE	Pepper	Capsicum	frutescens		NO	NO
PM01461	SINDOU	2001	Burkina Faso	INRAE	Pepper	Capsicum	chinense		NO	NO
PM01462	GAGOULI	2001	Burkina Faso	INRAE	Pepper	Capsicum	frutescens		NO	NO
PM01463	KIPARE	2001	Burkina Faso	INRAE	Pepper	Capsicum	annuum		NO	NO
PM01464	MATAPALO	2001	Costa Rica	INRAE	Pepper	Capsicum	frutescens		NO	NO
PM01465	RINCON	2001	Costa Rica	INRAE	Pepper	Capsicum	frutescens		NO	NO
PM01466	AMARILLA	2001	Costa Rica	INRAE	Pepper	Capsicum	frutescens		NO	NO
PM01467	CORCOVADO	2001	Costa Rica	INRAE	Pepper	Capsicum	frutescens		NO	NO
PM01468	GOLFITO	2001	Costa Rica	INRAE	Pepper	Capsicum	annuum		NO	NO
PM01469	YACO	2001	Costa Rica	INRAE	Pepper	Capsicum	frutescens		NO	NO
PM01471	RED BOY	2000	United States of America	Pepper Research Inc.	Pepper	Capsicum	annuum		NO	NO
PM01472	MERLIN	2001	France	INRAE	Pepper	Capsicum	annuum		NO	YES
PM01473	SALMON	2001	Senegal	INRAE	Pepper	Capsicum	annuum		NO	NO
PM01474	WIR	2001	Senegal	INRAE	Pepper	Capsicum	chinense		NO	NO
PM01475	TOGO	2001	Togo	Private individual	Pepper	Capsicum	frutescens		NO	NO
PM01476	XIANG JAN 6	2001	China	INSTITUTE OF VEGETABLES AND FLOWERS - CAAS	Pepper	Capsicum	annuum		NO	NO
PM01477	XIANG JAN 10	2001	China	INSTITUTE OF VEGETABLES AND FLOWERS - CAAS	Pepper	Capsicum	annuum		NO	NO
PM01478	RAMI 1	2002	France	Unknown	Pepper	Capsicum	annuum		NO	NO
PM01479	RAMI 3	2002	France	Unknown	Pepper	Capsicum	annuum		NO	NO
PM01480	MAX 1	2002	France	Unknown	Pepper	Capsicum	annuum		NO	NO
PM01481	MAX 2	2002	France	Unknown	Pepper	Capsicum	annuum		NO	NO
PM01482	MAX 3	2002	France	Unknown	Pepper	Capsicum	annuum		NO	NO
PM01483	DALAT	2002	Viet Nam	Private individual	Pepper	Capsicum	annuum		NO	NO
PM01484	MEKONG	2002	Viet Nam	Private individual	Pepper	Capsicum	annuum		NO	NO
PM01486	BRULANT D'ESPAGNE JAUNE	1962	Spain	I M B	Pepper	Capsicum	annuum		NO	NO
PM01487	SOUMAN BOUCOULE 3	1965	Burkina Faso	IRAT	Pepper	Capsicum	annuum		NO	NO
PM01488	MISHME 618	1967	Peru	Research station Molina - Peru	Pepper	Capsicum	baccatum		NO	NO
PM01489	EX PI123 474	1991	China	Vilmorin ( Limagrain Hm-Clause)	Pepper	Capsicum	annuum		NO	NO
PM01490	NATIVIDAD	1991	Mexico	Private individual	Pepper	Capsicum	annuum		NO	NO
PM01491	COPOYA	1991	Mexico	Private individual	Pepper	Capsicum	annuum		NO	NO
PM01492	C.ANNUUM EX281416	1993	Philippines	Private individual	Pepper	Capsicum	annuum		NO	NO
PM01493	C.ANNUUM EX224421	1993	Nicaragua	Private individual	Pepper	Capsicum	annuum		NO	NO
PM01495	ANAIS 17-2-3 pl.3	1996	Guadeloupe	INRAE	Pepper	Capsicum	annuum		NO	NO
PM01496	ANAIS 17-2-3 pl.4	1996	Guadeloupe	INRAE	Pepper	Capsicum	annuum		NO	NO
PM01498	L 491 A=Jaune	1998	Russian Federation	Majkop Research Station of Vavilov Institute URSS	Pepper	Capsicum	annuum		NO	NO
PM01499	BOLIVIE N°13	1967	Bolivia (Plurinational State of)	Unknown	Pepper	Capsicum	baccatum		NO	NO
PM01500	TURCHIARA	1969	Unknown	INRAE	Pepper	Capsicum	annuum		NO	NO
PM01501	CHALOCKCHARI	1969	Hungary	INRAE	Pepper	Capsicum	annuum		NO	NO
PM01503	PEO225- EGIZIANO 1	1991	Egypt	University of TURIN ITALIA	Pepper	Capsicum	annuum		NO	NO
PM01504	Saint NICOLAS	2002	Greece	INRAE	Pepper	Capsicum	annuum		NO	NO
PM01505	VEGETARIEN	2002	Saint Lucia	Private individual	Pepper	Capsicum	chinense		NO	NO
PM01506	PI235047-BS4	2002	Costa Rica	Rijkzwaan	Pepper	Capsicum	pubescens		NO	NO
PM01507	REUNION 1	2002	Réunion	Private individual	Pepper	Capsicum	baccatum		NO	NO
PM01508	REUNION 2	2002	Réunion	Private individual	Pepper	Capsicum	annuum		NO	NO
PM01509	XI LIU	2002	China	INRAE	Pepper	Capsicum	annuum		NO	NO
PM01510	QIE MEN	2002	China	INRAE	Pepper	Capsicum	annuum		NO	NO
PM01511	YIDUHONG	2002	China	INRAE	Pepper	Capsicum	annuum		NO	NO
PM01512	JIZHOU JIAO	2002	China	INRAE	Pepper	Capsicum	annuum		NO	NO
PM01513	SAN YING JIAO	2002	China	INRAE	Pepper	Capsicum	annuum		NO	NO
PM01514	IL 174	2002	Israel	The Agricultural Research Organization, The Volcani Center	Pepper	Capsicum	annuum		NO	NO
PM01516	DECO 3	2002	France	Unknown	Pepper	Capsicum	annuum		NO	YES
PM01517	CACO	2002	Costa Rica	INRAE	Pepper	Capsicum	frutescens		NO	NO
PM01518	TOUPIE JAUNE	2002	France	INRAE	Pepper	Capsicum	annuum		NO	YES
PM01519	TOUPIE ROUGE	2002	France	INRAE	Pepper	Capsicum	annuum		NO	YES
PM01521	LEOFEBVRE	2003	Martinique	INRAE	Pepper	Capsicum	chinense		NO	NO
PM01522	AV 7 JAUNE	1998	Israel	INRAE	Pepper	Capsicum	annuum		NO	NO
PM01523	AV 7 SAUMON	1998	Israel	INRAE	Pepper	Capsicum	annuum		NO	NO
PM01525	UBUD BALI 2	1998	Indonesia	Private individual	Pepper	Capsicum	annuum		NO	NO
PM01526	ERECTUS	2003	France	INRAE	Pepper	Capsicum	annuum		NO	YES
PM01527	ZACAPA	1989	Guatemala	NEW MEXICO STATE UNIVERSITY	Pepper	Capsicum	annuum		NO	NO
PM01528	BEPPINO JAUNE	1997	Italy	INRAE	Pepper	Capsicum	annuum		NO	NO
PM01530	CADOU B	1962	France	Unknown	Pepper	Capsicum	annuum		NO	NO
PM01532		1989	Guatemala	NEW MEXICO STATE UNIVERSITY	Pepper	Capsicum	annuum		NO	NO
PM01533	C.annuum var. glabriusculum (129-1)	1970	United States of America	University of California DAVIS CALIFORNIE USA	Pepper	Capsicum	annuum	WILD	NO	NO
PM01534	PIMENT d'ESPELETTE B	1983	France	Chambre d'agriculture Pyrénées Atlantiques	Pepper	Capsicum	annuum		NO	NO
PM01535	PIMENT D' ESPELETTE C	1983	France	Chambre d'agriculture Pyrénées Atlantiques	Pepper	Capsicum	annuum		NO	NO
PM01536	BELA KRUPNA BABURA	1969	Unknown	INRAE	Pepper	Capsicum	annuum		NO	NO
PM01537	YANGOON 1	2003	Myanmar	INRAE	Pepper	Capsicum	annuum		NO	NO
PM01538	BAGAN	2003	Myanmar	INRAE	Pepper	Capsicum	annuum		NO	NO
PM01539	DORA JAUNE (F1)	2003	Czechia	Res.Inst.Vegetable Growing and Breeding	Pepper	Capsicum	annuum		NO	NO
PM01540	MENDOZA	1983	Argentina	Unknown	Pepper	Capsicum	annuum	WILD	NO	NO
PM01541	BELL BOY	2001	United States of America	Pepper Research Inc.	Pepper	Capsicum	annuum		NO	NO
PM01542	NANTES 1	2003	France	INRAE	Pepper	Capsicum	annuum		NO	NO
PM01544	MEXICO 2 B JAUNE	2000	Mexico	Instituto de Investigaciones Hortícolas Liliana Dimitrova,	Pepper	Capsicum	annuum		NO	NO
PM01545	Hybride naturel ( Cha x Pen)	2003	France	Unknown	Pepper	Capsicum	hybride naturel	WILD	NO	NO
PM01546	ARCEAUX	2003	France	INRAE	Pepper	Capsicum	annuum		NO	YES
PM01547	SICUANI 1 rouge	2003	Peru	Private individual	Pepper	Capsicum	pubescens		NO	NO
PM01548	SICUANI 2 jaune	2003	Peru	Private individual	Pepper	Capsicum	pubescens		NO	NO
PM01549	SICUANI 3 Orange	2003	Peru	Private individual	Pepper	Capsicum	pubescens		NO	NO
PM01550	THAI	2004	Thailand	Private individual	Pepper	Capsicum	annuum		NO	NO
PM01551	PARENT RECURRENT DE IL174	2004	Israel	The Agricultural Research Organization, The Volcani Center	Pepper	Capsicum	annuum		NO	NO
PM01552	ROLOUBOK	2004	Ukraine	Laboratoire d’Horticulture INRAT,	Pepper	Capsicum	annuum		NO	NO
PM01553	DROUJOK	2003	Ukraine	Laboratoire d’Horticulture INRAT,	Pepper	Capsicum	annuum		NO	NO
PM01554	SNIEGUIR	2003	Ukraine	Laboratoire d’Horticulture INRAT,	Pepper	Capsicum	annuum		NO	NO
PM01555	AVENIR	2004	Senegal	INRAE	Pepper	Capsicum	chinense		NO	NO
PM01556	POINTE DES CANONNIERS	2004	Mauritius	INRAE	Pepper	Capsicum	annuum		NO	NO
PM01557	TAMARIN	2004	Mauritius	INRAE	Pepper	Capsicum	frutescens		NO	NO
PM01558	TOUPIE	2004	United States of America	NEW MEXICO STATE UNIVERSITY	Pepper	Capsicum	annuum		NO	NO
PM01559	NANTES 3	2004	France	INRAE	Pepper	Capsicum	annuum		NO	NO
PM01560	Nantes 4	2004	France	INRAE	Pepper	Capsicum	annuum		NO	NO
PM01561	YANGOON 2	2003	Myanmar	INRAE	Pepper	Capsicum	annuum		NO	NO
PM01563	GRAND BAIE	2004	Mauritius	INRAE	Pepper	Capsicum	annuum		NO	NO
PM01564	BEIJIN	2004	China	INRAE	Pepper	Capsicum	annuum		NO	NO
PM01565	MURAILLE 1	2004	China	INRAE	Pepper	Capsicum	annuum		NO	NO
PM01566	MURAILLE 2	2004	China	INRAE	Pepper	Capsicum	annuum		NO	NO
PM01567	CHENGE	2004	China	INRAE	Pepper	Capsicum	annuum		NO	NO
PM01568	PETIT MARSEILLAIS (DOUX)	2004	France	INRAE	Pepper	Capsicum	annuum		NO	NO
PM01569	MARIOL	2004	Cuba	INRAE	Pepper	Capsicum	chinense		NO	NO
PM01570	SOROA	2004	Cuba	INRAE	Pepper	Capsicum	frutescens		NO	NO
PM01571	ARTEMISA	2004	Cuba	INRAE	Pepper	Capsicum	chinense		NO	NO
PM01572	GUINES	2004	Cuba	INRAE	Pepper	Capsicum	annuum		NO	NO
PM01573	WAD MEDANI	2004	Sudan	INRAE	Pepper	Capsicum	annuum		NO	NO
PM01574	BARA	2004	Sudan	INRAE	Pepper	Capsicum	frutescens		NO	NO
PM01575	DOUX D' Espagne (lot 2)	2002	Spain	GEVES	Pepper	Capsicum	annuum		NO	NO
PM01576	KAMPONG	2005	Cambodia	Private individual	Pepper	Capsicum	annuum		NO	NO
PM01577	BAGA	2005	Togo	Private individual	Pepper	Capsicum	frutescens		NO	NO
PM01578	NANTES 5	2005	France	INRAE	Pepper	Capsicum	annuum		NO	NO
PM01579	0209-4	2005	Indonesia	AVRDC TAIWAN	Pepper	Capsicum	annuum		NO	NO
PM01580	CA 8	2005	Sri Lanka	AVRDC TAIWAN	Pepper	Capsicum	annuum		NO	NO
PM01581	MC 4	2005	Malaysia	AVRDC TAIWAN	Pepper	Capsicum	annuum		NO	NO
PM01582	PBC 384	2005	Malaysia	AVRDC TAIWAN	Pepper	Capsicum	annuum		NO	NO
PM01583	ORIAS KOSSAROU	2005	Hungary	AVRDC TAIWAN	Pepper	Capsicum	annuum		NO	NO
PM01584	PEO225- EGIZIANO 2	1991	Egypt	University of TURIN ITALIA	Pepper	Capsicum	annuum		NO	NO
PM01585	PEO225- EGIZIANO 3	1991	Egypt	University of TURIN ITALIA	Pepper	Capsicum	annuum		NO	NO
PM01586	TOUPIE CHOCOLAT	2005	United States of America	NEW MEXICO STATE UNIVERSITY	Pepper	Capsicum	annuum		NO	NO
PM01587	KIS CSERESNYE	2005	unknown	Gautier	Pepper	Capsicum	annuum		NO	YES
PM01588	TULUM	1991	Mexico	Private individual	Pepper	Capsicum	annuum		NO	NO
PM01589	TACOALECHE	1991	Mexico	Private individual	Pepper	Capsicum	annuum		NO	NO
PM01590	CHOVO	2005	Mexico	INRAE	Pepper	Capsicum	pubescens		NO	NO
PM01591	YALTEM	2005	Mexico	INRAE	Pepper	Capsicum	pubescens		NO	NO
PM01592	IXTAPA	2005	Mexico	INRAE	Pepper	Capsicum	annuum		NO	NO
PM01593	ACALA	2005	Mexico	INRAE	Pepper	Capsicum	chinense		NO	NO
PM01594	CHIAPILLA	2005	Mexico	INRAE	Pepper	Capsicum	chinense		NO	NO
PM01595	TOTOLAPA	2005	Mexico	INRAE	Pepper	Capsicum	annuum	WILD	NO	NO
PM01596	TENEJAPA	2005	Mexico	INRAE	Pepper	Capsicum	annuum		NO	NO
PM01597	CHAMULA	2005	Mexico	INRAE	Pepper	Capsicum	frutescens		NO	NO
PM01598	YOSHIB	2005	Mexico	INRAE	Pepper	Capsicum	frutescens		NO	NO
PM01599	CHENALHO	2005	Mexico	INRAE	Pepper	Capsicum	frutescens		NO	NO
PM01600	TEOPISCA	2005	Mexico	INRAE	Pepper	Capsicum	annuum		NO	NO
PM01601	MIE-MIDORI	2005	Japan	Takii	Pepper	Capsicum	annuum		NO	NO
PM01602	ISE	2005	Japan	Takii	Pepper	Capsicum	annuum		NO	YES
PM01603	AKASHI	2005	Japan	Takii	Pepper	Capsicum	annuum		NO	NO
PM01604	ISHII MIDORI	2005	Japan	Takii	Pepper	Capsicum	annuum		NO	YES
PM01605	SAPPORO ONAGA NANBAN	2005	Japan	Takii	Pepper	Capsicum	annuum		NO	YES
PM01606	TOSA SHISHITOH	2005	Japan	Takii	Pepper	Capsicum	annuum		NO	NO
PM01607	TAKANOTSUME	2005	Japan	Takii	Pepper	Capsicum	annuum		NO	YES
PM01608	NOKKOH	2005	Japan	Takii	Pepper	Capsicum	annuum		NO	YES
PM01609	FUSHIMI AMANAGA	2005	Japan	Takii	Pepper	Capsicum	annuum		NO	YES
PM01610	SHISHITOH	2005	Japan	Takii	Pepper	Capsicum	annuum		NO	NO
PM01611	MANGANJI	2005	Japan	Takii	Pepper	Capsicum	annuum		NO	YES
PM01612	JAIPUR	2005	India	INRAE	Pepper	Capsicum	annuum		NO	NO
PM01613	W4 HD(YOLO WONDER x CM334)4	2006	France	Unknown	Pepper	Capsicum	annuum		NO	YES
PM01614	C69 HD(CM334 x YOLO WONDER)69	2006	France	Unknown	Pepper	Capsicum	annuum		NO	YES
PM01615	HD330 HD(PM217 x YW)30	1981	France	Unknown	Pepper	Capsicum	annuum		YES	YES
PM01616	HD149 HD(PM687 x YW)49	1981	France	Unknown	Pepper	Capsicum	annuum		YES	YES
PM01617	TIEBELE	2006	Burkina Faso	INRAE	Pepper	Capsicum	annuum		NO	NO
PM01618	ZEKO	2006	Burkina Faso	INRAE	Pepper	Capsicum	chinense		NO	NO
PM01619	ZIOU	2006	Burkina Faso	INRAE	Pepper	Capsicum	chinense		NO	NO
PM01620	OBALA	2006	Cameroon	Private individual	Pepper	Capsicum	chinense		NO	NO
PM01621	BAHOO	2006	Cameroon	Private individual	Pepper	Capsicum	chinense		NO	NO
PM01622	SURAZ MUKHI	2006	India	Private individual	Pepper	Capsicum	annuum		NO	NO
PM01623	ELEPHANTS TRUNK	2006	India	Private individual	Pepper	Capsicum	annuum		NO	NO
PM01625	PUSA LONG	2006	India	Private individual	Pepper	Capsicum	annuum		NO	NO
PM01626	RIOBAMBA 1	2006	Ecuador	Private individual	Pepper	Capsicum	baccatum		NO	NO
PM01627	RIOBAMBA 2	2006	Ecuador	Private individual	Pepper	Capsicum	baccatum		NO	NO
PM01628	RIOBAMBA 3	2006	Ecuador	Private individual	Pepper	Capsicum	pubescens		NO	NO
PM01629	QUITO	2006	Ecuador	Private individual	Pepper	Capsicum	baccatum		NO	NO
PM01630	LUDHIANA	2006	India	Private individual	Pepper	Capsicum	annuum		NO	NO
PM01631	ALICANTE	2006	Spain	INRAE	Pepper	Capsicum	annuum		NO	NO
PM01632	GEANT DE CHINE type 1	2006	China	GEVES	Pepper	Capsicum	annuum		YES	YES
PM01633	CUZQUENO	2006	Chile	Private individual	Pepper	Capsicum	baccatum		NO	NO
PM01634	PERUANO	2006	Chile	Private individual	Pepper	Capsicum	chinense		NO	NO
PM01636	Ex PM1559 TG06-1NANTES6	2006	France	INRAE	Pepper	Capsicum	annuum		NO	NO
PM01637	ALLBIG JAUNE	2006	United States of America	USDA	Pepper	Capsicum	annuum		NO	NO
PM01638	MATINS JAUNES	2007	Netherlands	INRAE	Pepper	Capsicum	annuum		NO	NO
PM01639	MATINS ROUGES	2007	Netherlands	INRAE	Pepper	Capsicum	annuum		NO	NO
PM01640	THANH HOA	2007	Viet Nam	Private individual	Pepper	Capsicum	annuum		NO	NO
PM01641	INTERTHOR	2007	France	INRAE	Pepper	Capsicum	annuum		NO	NO
PM01642	PAPACCIA ROUGE	2007	Italy	INRAE	Pepper	Capsicum	annuum		NO	YES
PM01643	PAPACCIA JAUNE	2007	Italy	INRAE	Pepper	Capsicum	annuum		NO	YES
PM01644	ODA	2007	Poland	INRAE	Pepper	Capsicum	annuum		NO	NO
PM01645	BICOLORE	2007	Poland	INRAE	Pepper	Capsicum	annuum		NO	NO
PM01646	PRITTY IN PURPLE HOT ORNEMENTAL	2007	Poland	INRAE	Pepper	Capsicum	annuum		NO	NO
PM01647	LIHAO 1 (75-7-3-1)	2007	China	INSTITUTE OF VEGETABLES AND FLOWERS - CAAS	Pepper	Capsicum	annuum		NO	NO
PM01648	LIHAO 2 (93-100)	2007	China	INSTITUTE OF VEGETABLES AND FLOWERS - CAAS	Pepper	Capsicum	annuum		NO	NO
PM01649	PI290972 (01 SD)	2007	Colombia	USDA	Pepper	Capsicum	chinense		NO	NO
PM01650	BONDA A MAN JAQUES	2007	Guadeloupe	Private individual	Pepper	Capsicum	chinense		NO	NO
PM01651	BIG SUN	2007	Senegal	Technisem	Pepper	Capsicum	chinense		NO	NO
PM01652	HABANERO	2007	Senegal	Technisem	Pepper	Capsicum	chinense		NO	NO
PM01654	TUNIS 1	2007	Tunisia	INRAE	Pepper	Capsicum	annuum		NO	NO
PM01655	TUNIS 2	2007	Tunisia	INRAE	Pepper	Capsicum	annuum		NO	NO
PM01657	CHIVAY 2	2007	Peru	Private individual	Pepper	Capsicum	baccatum		NO	YES
PM01658	CHIVAY 3	2007	Peru	Private individual	Pepper	Capsicum	annuum		NO	YES
PM01661	CHIVAY 6	2007	Peru	Private individual	Pepper	Capsicum	pubescens		NO	NO
PM01662	VAL RAHMEH	2007	unknown	INRAE	Pepper	Capsicum	annuum	WILD	NO	NO
PM01663	BHUT JOLOKIA	2007	India	NEW MEXICO STATE UNIVERSITY	Pepper	Capsicum	chinense		NO	NO
PM01664	AJI CRISTAL	2008	Chile	Private individual	Pepper	Capsicum	baccatum		NO	NO
PM01665	CHARBEL	2008	Lebanon	Private individual	Pepper	Capsicum	annuum		NO	NO
PM01667	GROS CARRE JAUNE VERSION PIQUANTE	2008	France	Unknown	Pepper	Capsicum	annuum		NO	NO
PM01668	SAN SEPULCRO	2007	Italy	INRAE	Pepper	Capsicum	annuum		NO	NO
PM01669	ROMA	2007	Italy	INRAE	Pepper	Capsicum	annuum	WILD	NO	NO
PM01670	CHERRY BOMB	2007	United States of America	INRAE	Pepper	Capsicum	annuum		NO	NO
PM01671	ELENA 1	2008	Greece	Private individual	Pepper	Capsicum	annuum		NO	YES
PM01673	YEGUER	2008	Senegal	INRAE	Pepper	Capsicum	chinense		NO	NO
PM01674	DIAMA	2008	Senegal	INRAE	Pepper	Capsicum	chinense		NO	NO
PM01675	AJI CRISTAL	2008	Chile	Private individual	Pepper	Capsicum	baccatum		NO	NO
PM01676	MORNE ROUGE	2008	Martinique	Private individual	Pepper	Capsicum	chinense		NO	NO
PM01677	COORG	unknown	India	Private individual	Pepper	Capsicum	frutescens		NO	NO
PM01678	PADRON 1	2009	Spain	Private individual	Pepper	Capsicum	annuum		NO	YES
PM01679	BIODIV	2008	unknown	Private individual	Pepper	Capsicum	chinense		NO	NO
PM01680	MASQUERADE	2009	United States of America	Panamericanseed	Pepper	Capsicum	annuum		NO	NO
PM01681	SANGRIA	2009	United States of America	Panamericanseed	Pepper	Capsicum	annuum		NO	NO
PM01682	BLACK-PEARL	2009	United States of America	Panamericanseed	Pepper	Capsicum	annuum		NO	NO
PM01683	CALICO Ornemental	2009	United States of America	Panamericanseed	Pepper	Capsicum	annuum		NO	NO
PM01684	SANTOS FLAMME	2009	United States of America	Panamericanseed	Pepper	Capsicum	annuum		NO	NO
PM01685	PURPLE FLASH	2009	United States of America	Panamericanseed	Pepper	Capsicum	annuum		NO	NO
PM01686	LINE B2	2009	India	INRAE	Pepper	Capsicum	annuum		NO	NO
PM01687	ANDRATX	2009	Spain	Private individual	Pepper	Capsicum	annuum		NO	NO
PM01688	SA MOLA	2009	Spain	Private individual	Pepper	Capsicum	annuum		NO	NO
PM01689	PEGUERA	2009	Spain	Private individual	Pepper	Capsicum	annuum		NO	YES
PM01690	SANTA PONCA	2009	Spain	Private individual	Pepper	Capsicum	annuum		NO	NO
PM01691	MAGALUF 1	2009	Spain	Private individual	Pepper	Capsicum	annuum		NO	NO
PM01692	DRAGONERA 1	2009	Spain	Private individual	Pepper	Capsicum	annuum		NO	NO
PM01693	FAVERGES	2009	France	Private individual	Pepper	Capsicum	annuum		NO	YES
PM01694	MAYFOUQ	2009	Lebanon	INRAE	Pepper	Capsicum	annuum		NO	NO
PM01695	BEQAA KAFRA	2009	Lebanon	INRAE	Pepper	Capsicum	annuum		NO	NO
PM01696	SAMARKAND 1	2009	Uzbekistan	Private individual	Pepper	Capsicum	annuum		NO	YES
PM01697	SAMARKAND 2	2009	Uzbekistan	Private individual	Pepper	Capsicum	annuum		NO	NO
PM01698	SAKURA	2009	Brazil	INRAE	Pepper	Capsicum	annuum		NO	NO
PM01699	PELOTAS	2009	Brazil	INRAE	Pepper	Capsicum	baccatum		NO	NO
PM01700	BIQUINHO	2009	Brazil	INRAE	Pepper	Capsicum	chinense		NO	NO
PM01701	DEDO DE MOCA	2009	Brazil	INRAE	Pepper	Capsicum	baccatum		NO	NO
PM01702	CUMARI DO PARA	2009	Brazil	INRAE	Pepper	Capsicum	chinense		NO	NO
PM01704	MALAGUETA	2009	Brazil	INRAE	Pepper	Capsicum	frutescens		NO	NO
PM01705	AKITA	2009	Japan	Private individual	Pepper	Capsicum	annuum		NO	YES
PM01706	BEBOUR	2009	Réunion	INRAE	Pepper	Capsicum	frutescens		NO	NO
PM01707	PUERTO PRINCESA 1	2009	Philippines	INRAE	Pepper	Capsicum	annuum		NO	NO
PM01708	PUERTO PRINCESA 2	2009	Philippines	INRAE	Pepper	Capsicum	annuum		NO	NO
PM01709	PUERTO PRINCESA 3	2009	Philippines	INRAE	Pepper	Capsicum	annuum		NO	NO
PM01710	PUERTO PRINCESA 4	2009	Philippines	INRAE	Pepper	Capsicum	frutescens		NO	NO
PM01711	AMMAN	2009	Jordan	INRAE	Pepper	Capsicum	annuum		NO	NO
PM01712	SIMAO	2010	China	INRAE	Pepper	Capsicum	frutescens		NO	NO
PM01713	LOCAL BOLBAITE	2009	Spain	Nunhems	Pepper	Capsicum	annuum		NO	NO
PM01714	DRAGONERA 2	2010	Spain	Private individual	Pepper	Capsicum	annuum		NO	NO
PM01715	ECW 123	2010	United States of America	Private individual	Pepper	Capsicum	annuum		NO	NO
PM01716	MOISE	2010	Egypt	INRAE	Pepper	Capsicum	annuum		NO	NO
PM01717	MONTEVERDE	2010	Costa Rica	INRAE	Pepper	Capsicum	annuum		NO	NO
PM01718	UPV 25-791	2010	Ecuador	INRAE	Pepper	Capsicum	frutescens		NO	NO
PM01719	PEBRERA CANARIA	2010	Spain	INRAE	Pepper	Capsicum	frutescens		NO	NO
PM01720	AJI DULCE	2010	Cuba	INRAE	Pepper	Capsicum	chinense		NO	NO
PM01721	AJI PUTA PARIO	2010	Argentina	INRAE	Pepper	Capsicum	chacoense	WILD	NO	NO
PM01722	BOL 133	2010	Bolivia (Plurinational State of)	INRAE	Pepper	Capsicum			NO	NO
PM01723	CERECILLAS	2010	Spain	INRAE	Pepper	Capsicum	annuum		NO	NO
PM01725	CUNEO JAUNE	2010	Italy	Unknown	Pepper	Capsicum	annuum		NO	NO
PM01727	PIMENTA DE CHEIN 2	2010	Brazil	Unknown	Pepper	Capsicum	chinense		NO	NO
PM01728	BING DUONG 1	2010	Viet Nam	Private individual	Pepper	Capsicum	annuum		NO	NO
PM01729	BING DUONG 2	2010	Viet Nam	Private individual	Pepper	Capsicum	annuum		NO	NO
PM01730	NAWARE	2010	Togo	Private individual	Pepper	Capsicum	annuum		NO	NO
PM01731	BOUTIATIALE	2010	Togo	Private individual	Pepper	Capsicum	annuum		NO	NO
PM01732	KOUKA	2010	Togo	Private individual	Pepper	Capsicum	annuum		NO	NO
PM01734	CUREPIPE	2010	Réunion	INRAE	Pepper	Capsicum	annuum		NO	NO
PM01735	TROU AUX CERFS	2010	Réunion	INRAE	Pepper	Capsicum	frutescens		NO	NO
PM01736	BAISHAZHEN	2010	China	INRAE	Pepper	Capsicum	annuum		NO	NO
PM01738	SHANKOU	2010	China	INRAE	Pepper	Capsicum	annuum		NO	NO
PM01739	YULONG	2010	China	INRAE	Pepper	Capsicum	annuum		NO	NO
PM01740	YANSHUO	2010	China	INRAE	Pepper	Capsicum	baccatum		NO	NO
PM01741	MAGALUF 2	2010	Spain	Private individual	Pepper	Capsicum	annuum		NO	NO
PM01742	MAGALUF 3	2010	Spain	Private individual	Pepper	Capsicum	annuum		NO	NO
PM01743	CALIFORNIA WONDER 1	2010	United States of America	Takii	Pepper	Capsicum	annuum		YES	YES
PM01744	DOUX D'Espagne RACE D'ELNE	2010	Spain	Gautier	Pepper	Capsicum	annuum		YES	YES
PM01745	DOUX TRES LONG DES LANDES	2010	France	Gautier	Pepper	Capsicum	annuum		YES	YES
PM01746	GROS CARRE D'AMERIQUE	2010	France	Vilmorin ( Limagrain Hm-Clause)	Pepper	Capsicum	annuum		YES	YES
PM01747	LAGNES	2010	France	Gautier	Pepper	Capsicum	annuum		YES	YES
PM01748	LAGNES DE VELLERON	2010	France	Gautier	Pepper	Capsicum	annuum		YES	YES
PM01749	PIQUANT D'ALGERIE	2010	Algeria	GEVES	Pepper	Capsicum	annuum		YES	YES
PM01750	CAFE	2010	Guadeloupe	Private individual	Pepper	Capsicum	chinense		NO	NO
PM01751	ZOZIO	2010	Guadeloupe	Private individual	Pepper	Capsicum	frutescens		NO	NO
PM01752	PIMENT DE MONEIN	2010	France	Private individual	Pepper	Capsicum	annuum		NO	NO
PM01753	MANZANO ROCOTO RED	2011	United States of America	Rijkzwaan	Pepper	Capsicum	pubescens		NO	NO
PM01754	PI497985	2011	United States of America	Rijkzwaan	Pepper	Capsicum	chinense		NO	NO
PM01755	En attente de retourPI543182 Réseau	2011	United States of America	Rijkzwaan	Pepper	Capsicum			NO	NO
PM01756	SIEM REAP1	2011	Cambodia	Private individual	Pepper	Capsicum	frutescens		NO	NO
PM01757	SIEM REAP2	2011	Cambodia	Private individual	Pepper	Capsicum	annuum		NO	NO
PM01758	SEKATHAVA	2011	Sri Lanka	INRAE	Pepper	Capsicum	frutescens		NO	NO
PM01759	CARRE DE LAGNES	2011	France	Private individual	Pepper	Capsicum	annuum		NO	NO
PM01760	CEARA	2011	Brazil	GEVES	Pepper	Capsicum	frutescens		NO	NO
PM01761	HOKKAIDO	2011	Japan	GEVES	Pepper	Capsicum	annuum		NO	NO
PM01762	YUNNAN 1	2011	China	GEVES	Pepper	Capsicum	annuum		NO	NO
PM01763	YUNNAN 2	2011	China	GEVES	Pepper	Capsicum	annuum		NO	NO
PM01764	ASHQUELON	2011	Israel	GEVES	Pepper	Capsicum	annuum		NO	NO
PM01765	JUXTLAHVACA	2011	Mexico	GEVES	Pepper	Capsicum	annuum		NO	NO
PM01766	MIXTEPEC	2011	Mexico	GEVES	Pepper	Capsicum	annuum		NO	NO
PM01767	AJALPAN	2011	Mexico	GEVES	Pepper	Capsicum	pubescens		NO	NO
PM01768	TIERRA BLANCA	2011	Mexico	GEVES	Pepper	Capsicum	annuum		NO	NO
PM01769	JOLALPAN	2011	Mexico	GEVES	Pepper	Capsicum	annuum		NO	NO
PM01770	MARISCALA	2011	Mexico	GEVES	Pepper	Capsicum			NO	NO
PM01771	OLINALA	2011	Mexico	GEVES	Pepper	Capsicum	annuum		NO	NO
PM01772	COPALILO	2011	Mexico	GEVES	Pepper	Capsicum	pubescens		NO	NO
PM01773	SAN JOSE	2011	Mexico	GEVES	Pepper	Capsicum	annuum		NO	NO
PM01774	CUALAC	2011	Mexico	GEVES	Pepper	Capsicum	annuum		NO	NO
PM01775	AXUTLA	2011	Mexico	GEVES	Pepper	Capsicum	annuum		NO	NO
PM01776	TAXCO	2011	Mexico	GEVES	Pepper	Capsicum	pubescens		NO	NO
PM01777	MANZANA	2011	Mexico	GEVES	Pepper	Capsicum	pubescens		NO	NO
PM01778	COLOMBO	2011	Sri Lanka	INRAE	Pepper	Capsicum	annuum		NO	NO
PM01779	SENA	2011	Turkey	Killis University	Pepper	Capsicum	annuum		NO	NO
PM01780	MARAS 1	2011	Turkey	Killis University	Pepper	Capsicum	annuum		NO	NO
PM01781	AREQUIPA	2011	Peru	Private individual	Pepper	Capsicum	chinense		NO	NO
PM01782	CHIMBOTE	2011	Peru	Private individual	Pepper	Capsicum	baccatum		NO	NO
PM01783	PASCO	2011	Peru	Private individual	Pepper	Capsicum	chinense		NO	NO
PM01784	UCAYALI	2011	Peru	Private individual	Pepper	Capsicum	chinense		NO	NO
PM01785	AYACUCHO	2011	Peru	Private individual	Pepper	Capsicum	chinense		NO	NO
PM01786	HUANTA	2011	Peru	Private individual	Pepper	Capsicum	pubescens		NO	NO
PM01788	ONGOY	2011	Peru	Private individual	Pepper	Capsicum	pubescens		NO	NO
PM01789	CASAPATA	2011	Peru	Private individual	Pepper	Capsicum	annuum		NO	NO
PM01790	LIULICHANG	2011	China	INRAE	Pepper	Capsicum	annuum		NO	NO
PM01791	CHENGDE 1	2011	China	INRAE	Pepper	Capsicum	annuum		NO	NO
PM01792	CHENGDE 2	2011	China	INRAE	Pepper	Capsicum	annuum		NO	NO
PM01793	AJI PICANTE	2011	Guadeloupe	Private individual	Pepper	Capsicum	chinense		NO	NO
PM01794	EDGAR	2011	Guadeloupe	Private individual	Pepper	Capsicum	chinense		NO	NO
PM01795	JOSEPH	2011	Guadeloupe	Private individual	Pepper	Capsicum	chinense		NO	NO
PM01796	HD YOLO WONDER 1	2011	France	Unknown	Pepper	Capsicum	annuum		NO	NO
PM01797	HD YOLO WONDER 2	2011	France	Unknown	Pepper	Capsicum	annuum		NO	NO
PM01798	MANZANO ROCOTO RED 2	2011	United States of America	Rijkzwaan	Pepper	Capsicum	pubescens		NO	NO
PM01799	MANAPANY	2011	Réunion	INRAE	Pepper	Capsicum	baccatum		NO	NO
PM01800	UDAIPUR	2011	India	INRAE	Pepper	Capsicum	annuum		NO	NO
PM01801	PIMENT ZUAZO	2012	Haiti	INRAE	Pepper	Capsicum	annuum		NO	NO
PM01802	DAMBULLA	2012	Sri Lanka	Private individual	Pepper	Capsicum	annuum		NO	NO
PM01806	BOUKHARA	2012	Uzbekistan	Private individual	Pepper	Capsicum	annuum		NO	NO
PM01807	PHNOM PENH	2012	Viet Nam	Private individual	Pepper	Capsicum	frutescens		NO	NO
PM01808	MINI LAGNES	2012	France	INRAE	Pepper	Capsicum	annuum		NO	NO
PM01809	BATOTO	2012	French Guiana	Private individual	Pepper	Capsicum	chinense		NO	NO
PM01810	COSTAL	2012	Spain	Instituto murciano de Investigacion y Desarrollo Agrario y Alimentario (IMIDA),	Pepper	Capsicum	annuum		NO	NO
PM01811	PADRON 2	2012	Spain	Instituto murciano de Investigacion y Desarrollo Agrario y Alimentario (IMIDA),	Pepper	Capsicum	annuum		NO	NO
PM01812	DEL PIQUILLO	2012	Spain	Instituto murciano de Investigacion y Desarrollo Agrario y Alimentario (IMIDA),	Pepper	Capsicum	annuum		NO	NO
PM01814	MICHELINE	2012	Guadeloupe	Private individual	Pepper	Capsicum	chinense		NO	NO
PM01817	TEGALLALANG	2012	Indonesia	INRAE	Pepper	Capsicum	frutescens		NO	NO
PM01818	SARASWATI	2012	Indonesia	INRAE	Pepper	Capsicum	frutescens		NO	NO
PM01819	PEPERONCINO PICANTE CALABRESE	2012	Italy	Private individual	Pepper	Capsicum	annuum		NO	NO
PM01820	PIEL DE TOMATE	2012	Spain	Private individual	Pepper	Capsicum	annuum		NO	NO
PM01821	PEBROT DE LA REPUBLICA	2012	Spain	Private individual	Pepper	Capsicum	annuum		NO	NO
PM01823	JEAN-BENOIT	2012	Guadeloupe	Private individual	Pepper	Capsicum	chinense		NO	NO
PM01824	PIMENT DOUX D'ANGLET	2012	France	Private individual	Pepper	Capsicum	annuum		NO	NO
PM01825	VEDADO	2012	Cuba	GRAB	Pepper	Capsicum	annuum		NO	NO
PM01826	BOUBON	2013	Niger	INRAE	Pepper	Capsicum	chinense		NO	NO
PM01828	KIBOKONI	2013	United Republic of Tanzania	Private individual	Pepper	Capsicum			NO	NO
PM01829	NUNGWI	2013	United Republic of Tanzania	Private individual	Pepper	Capsicum	chinense		NO	NO
PM01830	VATAPI	2013	India	Private individual	Pepper	Capsicum	annuum		NO	NO
PM01831	BADAMI	2013	India	Private individual	Pepper	Capsicum	annuum		NO	NO
PM01832	PEPPER COME TEVI	2013	Thailand	INRAE	Pepper	Capsicum	frutescens		NO	NO
PM01833	FÂS BOYE 1	2013	Senegal	INRAE	Pepper	Capsicum	chinense		NO	NO
PM01834	FÂS BOYE 2	2013	Senegal	INRAE	Pepper	Capsicum	chinense		NO	NO
PM01835	BAT-LM	2013	Mexico	Private individual	Pepper	Capsicum			NO	NO
PM01836	BER-LM	2013	Mexico	Private individual	Pepper	Capsicum	annuum var. glabriusculum	WILD	NO	NO
PM01837	XIL-LM	2013	Mexico	Private individual	Pepper	Capsicum	annuum var. glabriusculum	WILD	NO	NO
PM01838	PEPERONE DI MONTAGNA	2013	Italy	Private individual	Pepper	Capsicum			NO	NO
PM01839	BUDAI CSIPÖS	2013	Hungary	Private individual	Pepper	Capsicum	annuum		NO	NO
PM01840	KECSKESZARV	2013	Hungary	Private individual	Pepper	Capsicum			NO	NO
PM01841	ARDEI IVTE PINTEA	2013	Romania	Private individual	Pepper	Capsicum	annuum		NO	NO
PM01842	PIMIENTA DE LA PALMA	2013	Spain	Private individual	Pepper	Capsicum			NO	NO
PM01845	PIRAPORA	2013	Italy	INRAE	Pepper	Capsicum	praetermissum	WILD	NO	NO
PM01846	LOMA PLATA	2013	Italy	INRAE	Pepper	Capsicum			NO	NO
PM01847	MATA FRADE	2013	Brazil	INRAE	Pepper	Capsicum	chinense		NO	NO
PM01848	JAMAÏCAIN	2013	France	INRAE	Pepper	Capsicum	chinense		NO	NO
PM01849	DE MAYOTTE	2013	France	INRAE	Pepper	Capsicum	chinense		NO	NO
PM01850	OUDOMXAY	2013	Lao People's Democratic Republic	Private individual	Pepper	Capsicum	frutescens		NO	NO
PM01852	TOPEPO ROJO	2013	Spain	Private individual	Pepper	Capsicum	annuum		NO	NO
PM01853	GUINDILLA LARGA ROJA	2013	Spain	Private individual	Pepper	Capsicum	annuum		NO	NO
PM01855	DIANI	2013	Kenya	INRAE	Pepper	Capsicum	frutescens		NO	NO
PM01856	VALACHIE 1	2014	Romania	GEVES	Pepper	Capsicum	annuum		NO	NO
PM01857	VALACHIE 2	2014	Romania	GEVES	Pepper	Capsicum	annuum		NO	NO
PM01858	VALACHIE 3	2014	Romania	GEVES	Pepper	Capsicum	annuum		NO	NO
PM01859	BUCAREST	2014	Romania	GEVES	Pepper	Capsicum	annuum		NO	NO
PM01860	QINGHE XIAN	2014	China	GEVES	Pepper	Capsicum			NO	NO
PM01861	NYAUNG SHWE 1	2014	Myanmar	INRAE	Pepper	Capsicum	annuum		NO	NO
PM01862	NYAUNG SHWE 2	2014	Myanmar	INRAE	Pepper	Capsicum			NO	NO
PM01863	MAOR	2014	Israel	The Agricultural Research Organization, The Volcani Center	Pepper	Capsicum	annuum		NO	NO
PM01864	CONGO	2014	Trinidad and Tobago	Private individual	Pepper	Capsicum	chinense		NO	NO
PM01865	ROCOTILLO DULCE	2014	Unknown	Private individual	Pepper	Capsicum	baccatum		NO	NO
PM01866	ANGKOR	2014	Cambodia	INRAE	Pepper	Capsicum			NO	NO
PM01867	AZZABA 1	2014	Algeria	Private individual	Pepper	Capsicum	annuum		NO	NO
PM01868	AZZABA 2	2014	Algeria	Private individual	Pepper	Capsicum	annuum		NO	NO
PM01869	AZZABA 3	2014	Algeria	Private individual	Pepper	Capsicum	annuum		NO	NO
PM01870	MALUKU	2014	Indonesia	Vilmorin ( Limagrain Hm-Clause)	Pepper	Capsicum	pubescens		NO	NO
PM01872	AMBODIFOTATRA	2015	Madagascar	Private individual	Pepper	Capsicum	chinense		NO	NO
PM01874	TOAMASINA	2015	Madagascar	Private individual	Pepper	Capsicum	annuum		NO	NO
PM01877	CRIOLLA SELLA	2015	Bolivia (Plurinational State of)	Private individual	Pepper	Capsicum	baccatum		NO	NO
PM01878	LAMENTIN	2015	Guadeloupe	Private individual	Pepper	Capsicum	chinense		NO	NO
PM01879	CŒUR BOULIKI	2015	Guadeloupe	Private individual	Pepper	Capsicum	chinense		NO	NO
PM01880	LIRAE Cu 10	2015	France	Unknown	Pepper	Capsicum	annuum		NO	NO
PM01881	LIRAE Va 4	2015	France	Unknown	Pepper	Capsicum	annuum		NO	NO
PM01882	ORIENT E3-2-246	2015	France	Unknown	Pepper	Capsicum	annuum		NO	NO
PM01883	ETANG SALE	2015	Réunion	Private individual	Pepper	Capsicum	annuum		NO	NO
PM01884	SIVRIA 600	2015	Bulgaria	MVCRI	Pepper	Capsicum			NO	NO
PM01885	BUKETEN 50	2015	Bulgaria	MVCRI	Pepper	Capsicum	annuum		NO	NO
PM01886	BULGARSKI RATUND	2015	Bulgaria	MVCRI	Pepper	Capsicum			NO	NO
PM01887	STRYAMA	2015	Bulgaria	MVCRI	Pepper	Capsicum	annuum		NO	NO
PM01888	HEBAR	2015	Bulgaria	MVCRI	Pepper	Capsicum	annuum		NO	NO
PM01889	KALOYAN	2015	Bulgaria	MVCRI	Pepper	Capsicum	annuum		NO	NO
PM01890	TRINIDAD PERFUME	2015	Trinidad and Tobago	Private individual	Pepper	Capsicum	chinense		NO	NO
PM01891	YELLOW SCOTCH BONNET	2015	Guadeloupe	Private individual	Pepper	Capsicum	chinense		NO	NO
PM01892	ITAPIOCA	2016	Brazil	Private individual	Pepper	Capsicum	chinense		NO	NO
PM01893	SOBRAL	2016	Brazil	Private individual	Pepper	Capsicum	chinense		NO	NO
PM01894	PARACURU	2016	Brazil	Private individual	Pepper	Capsicum	chinense		NO	NO
PM01895	FORTALEZA	2016	Brazil	Private individual	Pepper	Capsicum	frutescens		NO	NO
PM01896	CANINDE	2016	Brazil	Private individual	Pepper	Capsicum	chinense		NO	NO
PM01897	VALERIE	2016	France	Private individual	Pepper	Capsicum	annuum		NO	NO
PM01898	BIBER SERA DEMRE 8	2016	Turkey	Private individual	Pepper	Capsicum	annuum		NO	NO
PM01899	LANG DRUG	2016	Nepal	INRAE	Pepper	Capsicum	chinense		NO	NO
PM01900	PHEDI	2016	Nepal	INRAE	Pepper	Capsicum			NO	NO
PM01901	CHITWAN	2016	Nepal	INRAE	Pepper	Capsicum			NO	NO
PM01902	HAMLET	2016	Nepal	INRAE	Pepper	Capsicum			NO	NO
PM01903	NALA	2016	Nepal	INRAE	Pepper	Capsicum			NO	NO
PM01904	KHOLA	2016	Nepal	INRAE	Pepper	Capsicum			NO	NO
PM01905	BANGKOK	2016	Thailand	Private individual	Pepper	Capsicum	annuum		NO	NO
PM01906	TAGUATINCA	2016	Brazil	Private individual	Pepper	Capsicum	chinense		NO	NO
PM01907	PALMAS	2016	Brazil	Private individual	Pepper	Capsicum	frutescens		NO	NO
PM01908		2017	unknown	Unknown	Pepper	Capsicum			NO	NO
PM01909	HSD 965	1998	Sudan	Agricultural Plant Genetic Resources Conservation and Research Center / Agricultural Research Coorporation	Pepper	Capsicum			NO	NO
PM01910	HSD 971	1998	Sudan	Agricultural Plant Genetic Resources Conservation and Research Center / Agricultural Research Coorporation	Pepper	Capsicum			NO	NO
PM01911	HSD 998	1998	Sudan	Agricultural Plant Genetic Resources Conservation and Research Center / Agricultural Research Coorporation	Pepper	Capsicum			NO	NO
PM01912	HSD 1001	1998	Sudan	Agricultural Plant Genetic Resources Conservation and Research Center / Agricultural Research Coorporation	Pepper	Capsicum			NO	NO
PM01913	HSD 1015	1998	Sudan	Agricultural Plant Genetic Resources Conservation and Research Center / Agricultural Research Coorporation	Pepper	Capsicum			NO	NO
PM01914	HSD 1017	1998	Sudan	Agricultural Plant Genetic Resources Conservation and Research Center / Agricultural Research Coorporation	Pepper	Capsicum			NO	NO
PM01915	HSD 1023	1998	Sudan	Agricultural Plant Genetic Resources Conservation and Research Center / Agricultural Research Coorporation	Pepper	Capsicum			NO	NO
PM01916	HSD 1027	1998	Sudan	Agricultural Plant Genetic Resources Conservation and Research Center / Agricultural Research Coorporation	Pepper	Capsicum			NO	NO
PM01917	HSD 1028	1998	Sudan	Agricultural Plant Genetic Resources Conservation and Research Center / Agricultural Research Coorporation	Pepper	Capsicum			NO	NO
PM01918	HSD 1029	1998	Sudan	Agricultural Plant Genetic Resources Conservation and Research Center / Agricultural Research Coorporation	Pepper	Capsicum			NO	NO
PM01919	HSD 1032	1998	Sudan	Agricultural Plant Genetic Resources Conservation and Research Center / Agricultural Research Coorporation	Pepper	Capsicum			NO	NO
PM01920	HSD 1033	1998	Sudan	Agricultural Plant Genetic Resources Conservation and Research Center / Agricultural Research Coorporation	Pepper	Capsicum			NO	NO
PM01921	HSD 1036	1998	Sudan	Agricultural Plant Genetic Resources Conservation and Research Center / Agricultural Research Coorporation	Pepper	Capsicum			NO	NO
PM01922	HSD 1040	1998	Sudan	Agricultural Plant Genetic Resources Conservation and Research Center / Agricultural Research Coorporation	Pepper	Capsicum			NO	NO
PM01923	HSD 1042	1998	Sudan	Agricultural Plant Genetic Resources Conservation and Research Center / Agricultural Research Coorporation	Pepper	Capsicum			NO	NO
PM01924	HSD 1043	1998	Sudan	Agricultural Plant Genetic Resources Conservation and Research Center / Agricultural Research Coorporation	Pepper	Capsicum			NO	NO
PM01925	HSD 1044	1998	Sudan	Agricultural Plant Genetic Resources Conservation and Research Center / Agricultural Research Coorporation	Pepper	Capsicum			NO	NO
PM01926	HSD 1045	1998	Sudan	Agricultural Plant Genetic Resources Conservation and Research Center / Agricultural Research Coorporation	Pepper	Capsicum			NO	NO
PM01927	HSD 1048	1998	Sudan	Agricultural Plant Genetic Resources Conservation and Research Center / Agricultural Research Coorporation	Pepper	Capsicum			NO	NO
PM01928	HSD 1052	1998	Sudan	Agricultural Plant Genetic Resources Conservation and Research Center / Agricultural Research Coorporation	Pepper	Capsicum			NO	NO
PM01929	HSD 1053	1998	Sudan	Agricultural Plant Genetic Resources Conservation and Research Center / Agricultural Research Coorporation	Pepper	Capsicum			NO	NO
PM01930	HSD 1054	1998	Sudan	Agricultural Plant Genetic Resources Conservation and Research Center / Agricultural Research Coorporation	Pepper	Capsicum			NO	NO
PM01931	HSD 1059	1998	Sudan	Agricultural Plant Genetic Resources Conservation and Research Center / Agricultural Research Coorporation	Pepper	Capsicum			NO	NO
PM01932	HSD 1060	1998	Sudan	Agricultural Plant Genetic Resources Conservation and Research Center / Agricultural Research Coorporation	Pepper	Capsicum			NO	NO
PM01933	HSD 1061	1998	Sudan	Agricultural Plant Genetic Resources Conservation and Research Center / Agricultural Research Coorporation	Pepper	Capsicum			NO	NO
PM01934	HSD 1070	1998	Sudan	Agricultural Plant Genetic Resources Conservation and Research Center / Agricultural Research Coorporation	Pepper	Capsicum			NO	NO
PM01935	HSD 1072	1998	Sudan	Agricultural Plant Genetic Resources Conservation and Research Center / Agricultural Research Coorporation	Pepper	Capsicum			NO	NO
PM01936	HSD 1085	1998	Sudan	Agricultural Plant Genetic Resources Conservation and Research Center / Agricultural Research Coorporation	Pepper	Capsicum			NO	NO
PM01937	HSD 1107	1998	Sudan	Agricultural Plant Genetic Resources Conservation and Research Center / Agricultural Research Coorporation	Pepper	Capsicum			NO	NO
PM01938	HSD 1113	1998	Sudan	Agricultural Plant Genetic Resources Conservation and Research Center / Agricultural Research Coorporation	Pepper	Capsicum			NO	NO
PM01939	HSD 1122	1998	Sudan	Agricultural Plant Genetic Resources Conservation and Research Center / Agricultural Research Coorporation	Pepper	Capsicum			NO	NO
PM01940	HSD 1124	1998	Sudan	Agricultural Plant Genetic Resources Conservation and Research Center / Agricultural Research Coorporation	Pepper	Capsicum			NO	NO
PM01941	HSD 1201	1998	Sudan	Agricultural Plant Genetic Resources Conservation and Research Center / Agricultural Research Coorporation	Pepper	Capsicum			NO	NO
PM01942	HSD 632	1998	Sudan	Agricultural Plant Genetic Resources Conservation and Research Center / Agricultural Research Coorporation	Pepper	Capsicum			NO	NO
PM01943	HSD 640	1998	Sudan	Agricultural Plant Genetic Resources Conservation and Research Center / Agricultural Research Coorporation	Pepper	Capsicum			NO	NO
PM01944	HSD 720	1998	Sudan	Agricultural Plant Genetic Resources Conservation and Research Center / Agricultural Research Coorporation	Pepper	Capsicum			NO	NO
PM01945	Antecume-Pata	2018	French Guiana	Private individual	Pepper	Capsicum	chinense		NO	NO
PM01946	Maeva	2018	Guadeloupe	Private individual	Pepper	Capsicum	chinense		NO	NO
PM01947	Raisins clairs	2018	Guadeloupe	Private individual	Pepper	Capsicum	chinense		NO	NO
PM01948	Bonnet rouge	2018	Guadeloupe	Private individual	Pepper	Capsicum	chinense		NO	NO
PM01950	Olivier	2018	Guadeloupe	Private individual	Pepper	Capsicum	chinense		NO	NO
PM01951	Cristal	2018	Spain	Private individual	Pepper	Capsicum	annuum		NO	NO
PM01952	Vinagre	2018	Spain	Private individual	Pepper	Capsicum	annuum		NO	NO
PM01953	Najerano	2018	Spain	Private individual	Pepper	Capsicum	annuum		NO	NO
PM01954	Piquillo de Lodosa	2018	Spain	Private individual	Pepper	Capsicum	annuum		NO	NO
PM01955	Thaï Volcano	2018	unknown	Private individual	Pepper	Capsicum	annuum		NO	NO
PM01956	DH310	2018	France	Unknown	Pepper	Capsicum			NO	NO
PM01957	DH129	2018	France	Unknown	Pepper	Capsicum			NO	NO
PM01958	DH108	2018	France	Unknown	Pepper	Capsicum			NO	NO
PM01959	Piment D'Anglet	2018	France	Private individual	Pepper	Capsicum	annuum		NO	NO
PM01960	Galleria	2018	Martinique	INRAE	Pepper	Capsicum	annuum		NO	NO
PM01961	Piment d'Espelette	2018	France	Syndicat des producteurs de Piment d'Espelette	Pepper	Capsicum	annuum		NO	NO
PM01962	CGN22876 = PI 606708	2018	Peru	CGN/ Pays Bas	Pepper	Capsicum	tovarii	WILD	NO	NO
PM01963	Bondamanjak jaune	2018	French Guiana	Private individual	Pepper	capsicum			NO	NO
PM01964	Bonnet jaune	2018	French Guiana	Private individual	Pepper	capsicum			NO	NO
PM01965	Café de Guyane	2018	French Guiana	Private individual	Pepper	capsicum			NO	NO
PM01966	Kaka rat	2018	French Guiana	Private individual	Pepper	capsicum	frutescens		NO	NO
PM01967	Boa vista	2018	Cabo Verde	Private individual	Pepper	capsicum	baccatum		NO	NO
PM01968	Piment sauvage Guyane	2018	French Guiana	Private individual	Pepper	capsicum		WILD	NO	NO
PM01969	Sept courts bouillons jaune	2018	French Guiana	Private individual	Pepper	capsicum			NO	NO
PM01970	Sept courts bouillons rouge	2018	French Guiana	Private individual	Pepper	capsicum			NO	NO
PM01971	CGN16975 = AC 1979	2019	Jamaica	CGN/ Pays Bas	Pepper	Capsicum	annuum var. glabriusculum	WILD	NO	NO
PM01972	CGN16976 = AC 2255	2019	Honduras	CGN/ Pays Bas	Pepper	Capsicum	annuum var. glabriusculum	WILD	NO	NO
PM01973	CGN20808 = AC 2017	2019	Bolivia (Plurinational State of)	CGN/ Pays Bas	Pepper	Capsicum	annuum var. glabriusculum	WILD	NO	NO
PM01974	CGN21526 = 2363	2019	Mexico	CGN/ Pays Bas	Pepper	Capsicum	annuum var. glabriusculum	WILD	NO	NO
PM01975	CGN22772 = 7100	2019	Guatemala	CGN/ Pays Bas	Pepper	Capsicum	annuum var. glabriusculum	WILD	NO	NO
PM01976	CGN22773 = 7101	2019	Guatemala	CGN/ Pays Bas	Pepper	Capsicum	annuum var. glabriusculum	WILD	NO	NO
PM01977	CGN22777 = 7116	2019	Costa Rica	CGN/ Pays Bas	Pepper	Capsicum	annuum var. glabriusculum	WILD	NO	NO
PM01978	CGN22865 = Cb 2	2019	United States of America	CGN/ Pays Bas	Pepper	Capsicum	annuum var. glabriusculum	WILD	NO	NO
PM01979	CGN22866 = Cb 8	2019	Guatemala	CGN/ Pays Bas	Pepper	Capsicum	annuum var. glabriusculum	WILD	NO	NO
PM01980	CGN23200 = 7112a	2019	Costa Rica	CGN/ Pays Bas	Pepper	Capsicum	annuum var. glabriusculum	WILD	NO	NO
PM01981	CGN24333	2019	unknown	CGN/ Pays Bas	Pepper	Capsicum	chinense	WILD	NO	NO
PM01982	CGN22775 = 7104	2019	Guatemala	CGN/ Pays Bas	Pepper	Capsicum	frutescens	WILD	NO	NO
PM01983	CGN22790 = AC 1249	2019	Mexico	CGN/ Pays Bas	Pepper	Capsicum	frutescens	WILD	NO	NO
PM01984	CGN22792 = SA 252	2019	Peru	CGN/ Pays Bas	Pepper	Capsicum	frutescens	WILD	NO	NO
PM01985	CGN23210 = SA 137	2019	Peru	CGN/ Pays Bas	Pepper	Capsicum	frutescens	WILD	NO	NO
PM01986	Petit rectangulaire doux	2000	unknown	Unknown	Pepper	capsicum	annuum		YES	YES
PM01987	PI 1969	2019	unknown	The Agricultural Research Organization, The Volcani Center	Pepper	Capsicum	annuum		NO	NO
PM01988	PI 1970	2019	unknown	The Agricultural Research Organization, The Volcani Center	Pepper	Capsicum	annuum		NO	NO
PM01989	PI 1617	2019	unknown	The Agricultural Research Organization, The Volcani Center	Pepper	Capsicum	chinense		NO	NO
PM01990	PI 1238	2019	unknown	The Agricultural Research Organization, The Volcani Center	Pepper	Capsicum	annuum		NO	NO
PM01991	PI 1228	2019	unknown	The Agricultural Research Organization, The Volcani Center	Pepper	Capsicum	annuum		NO	NO
PM01992	PI 1190-57	2019	unknown	The Agricultural Research Organization, The Volcani Center	Pepper	Capsicum	annuum		NO	NO
PM01993	PI 1159	2019	unknown	The Agricultural Research Organization, The Volcani Center	Pepper	Capsicum	annuum		NO	NO
PM01994	PI 1147	2019	unknown	The Agricultural Research Organization, The Volcani Center	Pepper	Capsicum	annuum		NO	NO
PM01995	PI 807	2019	unknown	The Agricultural Research Organization, The Volcani Center	Pepper	Capsicum	annuum		NO	NO
PM01996	Miscucho colorado	2019	unknown	The Agricultural Research Organization, The Volcani Center	Pepper	Capsicum	chinense	Traditional cultivar	NO	NO
PM01997	PI 1723-43	2019	unknown	The Agricultural Research Organization, The Volcani Center	Pepper	Capsicum	annuum		NO	NO
PM01998	PI 2054-5	2019	unknown	The Agricultural Research Organization, The Volcani Center	Pepper	Capsicum	annuum	WILD	NO	NO
PM01999	PI 2054-8	2019	unknown	The Agricultural Research Organization, The Volcani Center	Pepper	Capsicum	annuum	WILD	NO	NO
PM02000	PI 2054-11	2019	unknown	The Agricultural Research Organization, The Volcani Center	Pepper	Capsicum	annuum	Traditional cultivar	NO	NO
PM02001	PI 2054-15	2019	unknown	The Agricultural Research Organization, The Volcani Center	Pepper	Capsicum	annuum	Traditional cultivar	NO	NO
PM02002	PI 2054-36	2019	unknown	The Agricultural Research Organization, The Volcani Center	Pepper	Capsicum	annuum	Traditional cultivar	NO	NO
PM02003	PI 2054-43	2019	unknown	The Agricultural Research Organization, The Volcani Center	Pepper	Capsicum	annuum	Traditional cultivar	NO	NO
PM02004	PI 2054-45	2019	unknown	The Agricultural Research Organization, The Volcani Center	Pepper	Capsicum	annuum	Traditional cultivar	NO	NO
PM02005	PI 2054-46	2019	unknown	The Agricultural Research Organization, The Volcani Center	Pepper	Capsicum	annuum	Traditional cultivar	NO	NO
PM02006	PI 2054-55	2019	unknown	The Agricultural Research Organization, The Volcani Center	Pepper	Capsicum	annuum	Traditional cultivar	NO	NO
PM02007	PI 2054-62	2019	unknown	The Agricultural Research Organization, The Volcani Center	Pepper	Capsicum	annuum	Traditional cultivar	NO	NO
PM02008	PI 2054-76	2019	unknown	The Agricultural Research Organization, The Volcani Center	Pepper	Capsicum	annuum	Traditional cultivar	NO	NO
PM02009	PI 2054-89	2019	unknown	The Agricultural Research Organization, The Volcani Center	Pepper	Capsicum	annuum	Traditional cultivar	NO	NO
PM02010	PI 2054-92	2019	unknown	The Agricultural Research Organization, The Volcani Center	Pepper	Capsicum	annuum	Traditional cultivar	NO	NO
PM02011	PI 2054-139	2019	unknown	The Agricultural Research Organization, The Volcani Center	Pepper	Capsicum	chinense	Traditional cultivar	NO	NO
PM02012	PI 2054-146	2019	unknown	The Agricultural Research Organization, The Volcani Center	Pepper	Capsicum	chinense	Traditional cultivar	NO	NO
PM02013	PI 2054-156	2019	unknown	The Agricultural Research Organization, The Volcani Center	Pepper	Capsicum	chinense	Traditional cultivar	NO	NO
PM02014	PI 2054-169	2019	unknown	The Agricultural Research Organization, The Volcani Center	Pepper	Capsicum	frutescens	WILD	NO	NO
PM02015	PI 2054-189	2019	unknown	The Agricultural Research Organization, The Volcani Center	Pepper	Capsicum	frutescens	WILD	NO	NO
PM02016	PI 2054-193	2019	unknown	The Agricultural Research Organization, The Volcani Center	Pepper	Capsicum	frutescens	WILD	NO	NO
PM02017	PI 2055-84	2019	unknown	The Agricultural Research Organization, The Volcani Center	Pepper	Capsicum	annuum	Traditional cultivar	NO	NO
PM02018	PI 2055-94	2019	unknown	The Agricultural Research Organization, The Volcani Center	Pepper	Capsicum	annuum	Traditional cultivar	NO	NO
PM02019	PI 2055-102	2019	unknown	The Agricultural Research Organization, The Volcani Center	Pepper	Capsicum	annuum	Traditional cultivar	NO	NO
PM02020	PI 2055-112	2019	unknown	The Agricultural Research Organization, The Volcani Center	Pepper	Capsicum	annuum	Traditional cultivar	NO	NO
PM02021	PI 2055-164	2019	unknown	The Agricultural Research Organization, The Volcani Center	Pepper	Capsicum	annuum	Traditional cultivar	NO	NO
PM02022	PI 2055-170	2019	unknown	The Agricultural Research Organization, The Volcani Center	Pepper	Capsicum	annuum	Traditional cultivar	NO	NO
PM02023	PI 2055-180	2019	unknown	The Agricultural Research Organization, The Volcani Center	Pepper	Capsicum	annuum	Traditional cultivar	NO	NO
PM02024	PI 2055-184	2019	unknown	The Agricultural Research Organization, The Volcani Center	Pepper	Capsicum	annuum	Traditional cultivar	NO	NO
PM02025	PI 2055-197	2019	unknown	The Agricultural Research Organization, The Volcani Center	Pepper	Capsicum	annuum	Traditional cultivar	NO	NO
PM02026	PI 2055-216	2019	unknown	The Agricultural Research Organization, The Volcani Center	Pepper	Capsicum	annuum	Traditional cultivar	NO	NO
PM02027	PI 2055-218	2019	unknown	The Agricultural Research Organization, The Volcani Center	Pepper	Capsicum	annuum	Traditional cultivar	NO	NO
PM02028	PI 2055-232	2019	unknown	The Agricultural Research Organization, The Volcani Center	Pepper	Capsicum	annuum	Traditional cultivar	NO	NO
PM02029	PI 2055-239	2019	unknown	The Agricultural Research Organization, The Volcani Center	Pepper	Capsicum	annuum	Traditional cultivar	NO	NO
PM02030	PI 2055-242	2019	unknown	The Agricultural Research Organization, The Volcani Center	Pepper	Capsicum	chinense	Traditional cultivar	NO	NO
PM02031	PI 2055-246	2019	unknown	The Agricultural Research Organization, The Volcani Center	Pepper	Capsicum	annuum	Traditional cultivar	NO	NO
PM02032	PI 2055-255	2019	unknown	The Agricultural Research Organization, The Volcani Center	Pepper	Capsicum	annuum	Traditional cultivar	NO	NO
PM02033	PI 2055-260	2019	unknown	The Agricultural Research Organization, The Volcani Center	Pepper	Capsicum	annuum	Traditional cultivar	NO	NO
PM02034	PI 2055-273	2019	unknown	The Agricultural Research Organization, The Volcani Center	Pepper	Capsicum	annuum	Traditional cultivar	NO	NO
PM02035	BATEM Pep 1	2019	unknown	BATEM	Pepper	Capsicum	annuum	Traditional cultivar	NO	NO
PM02036	BATEM Pep 2	2019	unknown	BATEM	Pepper	Capsicum	annuum	Traditional cultivar	NO	NO
PM02037	BATEM Pep 3	2019	unknown	BATEM	Pepper	Capsicum	annuum	Traditional cultivar	NO	NO
PM02038	BATEM Pep 7	2019	unknown	BATEM	Pepper	Capsicum	annuum	Traditional cultivar	NO	NO
PM02039	BATEM Pep 8	2019	unknown	BATEM	Pepper	Capsicum	annuum	Traditional cultivar	NO	NO
PM02040	BATEM Pep 10	2019	unknown	BATEM	Pepper	Capsicum	annuum	Traditional cultivar	NO	NO
PM02041	BATEM Pep 13	2019	unknown	BATEM	Pepper	Capsicum	annuum	Traditional cultivar	NO	NO
PM02042	BATEM Pep 14	2019	unknown	BATEM	Pepper	Capsicum	annuum	Traditional cultivar	NO	NO
PM02043	BATEM Pep 15	2019	unknown	BATEM	Pepper	Capsicum	annuum	Traditional cultivar	NO	NO
PM02044	BATEM Pep 17	2019	unknown	BATEM	Pepper	Capsicum	annuum	Traditional cultivar	NO	NO
PM02045	BATEM Pep 20	2019	unknown	BATEM	Pepper	Capsicum	annuum	Traditional cultivar	NO	NO
PM02046	BATEM Pep 22	2019	unknown	BATEM	Pepper	Capsicum	annuum	Traditional cultivar	NO	NO
PM02047	BATEM Pep 24	2019	unknown	BATEM	Pepper	Capsicum	annuum	Traditional cultivar	NO	NO
PM02048	BATEM Pep 26	2019	unknown	BATEM	Pepper	Capsicum	annuum	Traditional cultivar	NO	NO
PM02049	BATEM Pep 28	2019	unknown	BATEM	Pepper	Capsicum	annuum	Traditional cultivar	NO	NO
PM02050	BATEM Pep 29	2019	unknown	BATEM	Pepper	Capsicum	annuum	Traditional cultivar	NO	NO
PM02051	BATEM Pep 30	2019	unknown	BATEM	Pepper	Capsicum	annuum	Traditional cultivar	NO	NO
PM02052	BATEM Pep 31	2019	unknown	BATEM	Pepper	Capsicum	annuum	Traditional cultivar	NO	NO
PM02053	BATEM Pep 33	2019	unknown	BATEM	Pepper	Capsicum	annuum	Traditional cultivar	NO	NO
PM02054	BATEM Pep 35	2019	unknown	BATEM	Pepper	Capsicum	annuum	Traditional cultivar	NO	NO
PM02055	BATEM Pep 36	2019	unknown	BATEM	Pepper	Capsicum	annuum	Traditional cultivar	NO	NO
PM02056	BATEM Pep 39	2019	unknown	BATEM	Pepper	Capsicum	annuum	Traditional cultivar	NO	NO
PM02057	BATEM Pep 41	2019	unknown	BATEM	Pepper	Capsicum	annuum	Traditional cultivar	NO	NO
PM02058	BATEM Pep 44	2019	unknown	BATEM	Pepper	Capsicum	annuum	Traditional cultivar	NO	NO
PM02059	BATEM Pep 48	2019	unknown	BATEM	Pepper	Capsicum	annuum	Traditional cultivar	NO	NO
PM02060	Friariello Torre	2019	unknown	CREA Italie	Pepper	Capsicum	annuum	Traditional cultivar	NO	NO
PM02061	Black coban	2019	unknown	CREA Italie	Pepper	Capsicum	annuum	Traditional cultivar	NO	NO
PM02062	Bulgarian carrot	2019	unknown	CREA Italie	Pepper	Capsicum	annuum	Traditional cultivar	NO	NO
PM02063	aji picante largo [vernacular name]	2019	unknown	Institut pour Amélioration des plantes cultivées	Pepper	Capsicum	annuum	Traditional cultivar	NO	NO
PM02064	CAP 1039	2019	unknown	Institut pour Amélioration des plantes cultivées	Pepper	Capsicum	annuum	Traditional cultivar	NO	NO
PM02065	peperone lungo [vernacular name]	2019	unknown	Institut pour Amélioration des plantes cultivées	Pepper	Capsicum	annuum	Traditional cultivar	NO	NO
PM02066	CAP 1045	2019	unknown	Institut pour Amélioration des plantes cultivées	Pepper	Capsicum	annuum	Traditional cultivar	NO	NO
PM02067	CAP 1060	2019	unknown	Institut pour Amélioration des plantes cultivées	Pepper	Capsicum	annuum	Traditional cultivar	NO	NO
PM02068	CAP 1061	2019	unknown	Institut pour Amélioration des plantes cultivées	Pepper	Capsicum	annuum	Traditional cultivar	NO	NO
PM02069	CAP 1067	2019	unknown	Institut pour Amélioration des plantes cultivées	Pepper	Capsicum	annuum	Traditional cultivar	NO	NO
PM02070	CAP 1074	2019	unknown	Institut pour Amélioration des plantes cultivées	Pepper	Capsicum	annuum	Traditional cultivar	NO	NO
PM02071	CAP 1075	2019	unknown	Institut pour Amélioration des plantes cultivées	Pepper	Capsicum	annuum	Traditional cultivar	NO	NO
PM02072	CAP 1091	2019	unknown	Institut pour Amélioration des plantes cultivées	Pepper	Capsicum	annuum	Traditional cultivar	NO	NO
PM02073	CAP 1114	2019	unknown	Institut pour Amélioration des plantes cultivées	Pepper	Capsicum	annuum		NO	NO
PM02074	904750149Z	2019	unknown	Institut pour Amélioration des plantes cultivées	Pepper	Capsicum			NO	NO
PM02075	CAP 1146	2019	unknown	Institut pour Amélioration des plantes cultivées	Pepper	Capsicum	annuum		NO	NO
PM02076	CAP 1186	2019	unknown	Institut pour Amélioration des plantes cultivées	Pepper	Capsicum	annuum	Traditional cultivar	NO	NO
PM02077	Ikom II	2019	unknown	Institut pour Amélioration des plantes cultivées	Pepper	Capsicum	annuum	Traditional cultivar	NO	NO
PM02078	Caroussel	2019	unknown	Institut pour Amélioration des plantes cultivées	Pepper	Capsicum	annuum		NO	NO
PM02079	Sweet Long Red Pepper	2019	unknown	Institut pour Amélioration des plantes cultivées	Pepper	Capsicum	annuum		NO	NO
PM02080	CAP 1214	2019	unknown	Institut pour Amélioration des plantes cultivées	Pepper	Capsicum	baccatum	Traditional cultivar	NO	NO
PM02081	CAP 1223	2019	unknown	Institut pour Amélioration des plantes cultivées	Pepper	Capsicum	annuum	Traditional cultivar	NO	NO
PM02082	Yolo Wonder	2019	unknown	Institut pour Amélioration des plantes cultivées	Pepper	Capsicum	annuum	Traditional cultivar	NO	NO
PM02083	Pitelca	2019	unknown	Institut pour Amélioration des plantes cultivées	Pepper	Capsicum	annuum		NO	NO
PM02084	CAP 1260	2019	unknown	Institut pour Amélioration des plantes cultivées	Pepper	Capsicum	annuum	Traditional cultivar	NO	NO
PM02085	CAP 1262	2019	unknown	Institut pour Amélioration des plantes cultivées	Pepper	Capsicum	annuum		NO	NO
PM02086	CAP 1271	2019	unknown	Institut pour Amélioration des plantes cultivées	Pepper	Capsicum	annuum	Traditional cultivar	NO	NO
PM02087	Hodoninska Sladka Previsla	2019	unknown	Institut pour Amélioration des plantes cultivées	Pepper	Capsicum	annuum	Traditional cultivar	NO	NO
PM02088	CAP 1277	2019	unknown	Institut pour Amélioration des plantes cultivées	Pepper	Capsicum	annuum	Traditional cultivar	NO	NO
PM02089	Hurbanovska 4	2019	unknown	Institut pour Amélioration des plantes cultivées	Pepper	Capsicum	annuum	Traditional cultivar	NO	NO
PM02090	CAP 1286	2019	unknown	Institut pour Amélioration des plantes cultivées	Pepper	Capsicum	annuum	Traditional cultivar	NO	NO
PM02091	CAP 1290	2019	unknown	Institut pour Amélioration des plantes cultivées	Pepper	Capsicum	annuum	Traditional cultivar	NO	NO
PM02092	CAP 1301	2019	unknown	Institut pour Amélioration des plantes cultivées	Pepper	Capsicum	annuum	Traditional cultivar	NO	NO
PM02093	CAP 1304	2019	unknown	Institut pour Amélioration des plantes cultivées	Pepper	Capsicum	annuum	Traditional cultivar	NO	NO
PM02094	CAP 1308	2019	unknown	Institut pour Amélioration des plantes cultivées	Pepper	Capsicum	annuum	Traditional cultivar	NO	NO
PM02095	CAP 1316	2019	unknown	Institut pour Amélioration des plantes cultivées	Pepper	Capsicum	annuum	Traditional cultivar	NO	NO
PM02096	CAP 1323	2019	unknown	Institut pour Amélioration des plantes cultivées	Pepper	Capsicum	annuum	Traditional cultivar	NO	NO
PM02097	CAP 1327	2019	unknown	Institut pour Amélioration des plantes cultivées	Pepper	Capsicum	annuum	Traditional cultivar	NO	NO
PM02098	CAP 1330	2019	unknown	Institut pour Amélioration des plantes cultivées	Pepper	Capsicum	annuum	Traditional cultivar	NO	NO
PM02099	CAP 1332	2019	unknown	Institut pour Amélioration des plantes cultivées	Pepper	Capsicum	annuum	Traditional cultivar	NO	NO
PM02100	CAP 1340	2019	unknown	Institut pour Amélioration des plantes cultivées	Pepper	Capsicum	annuum	Traditional cultivar	NO	NO
PM02101	Paradicsomalaku Zold	2019	unknown	Institut pour Amélioration des plantes cultivées	Pepper	Capsicum	annuum		NO	NO
PM02102	CAP 1353	2019	unknown	Institut pour Amélioration des plantes cultivées	Pepper	Capsicum	annuum	Traditional cultivar	NO	NO
PM02103	Topepo Bianco-Giallo	2019	unknown	Institut pour Amélioration des plantes cultivées	Pepper	Capsicum	annuum		NO	NO
PM02104	CAP 1364	2019	unknown	Institut pour Amélioration des plantes cultivées	Pepper	Capsicum		Traditional cultivar	NO	NO
PM02105	CAP 1366	2019	unknown	Institut pour Amélioration des plantes cultivées	Pepper	Capsicum	baccatum	Traditional cultivar	NO	NO
PM02106	Pimento de Alvalade	2019	unknown	Institut pour Amélioration des plantes cultivées	Pepper	Capsicum	annuum		NO	NO
PM02107	CAP 1389	2019	unknown	Institut pour Amélioration des plantes cultivées	Pepper	Capsicum	annuum	Traditional cultivar	NO	NO
PM02108	CAP 1390	2019	unknown	Institut pour Amélioration des plantes cultivées	Pepper	Capsicum	annuum	Traditional cultivar	NO	NO
PM02109	CAP 1396	2019	unknown	Institut pour Amélioration des plantes cultivées	Pepper	Capsicum	annuum	Traditional cultivar	NO	NO
PM02110	CAP 1400	2019	unknown	Institut pour Amélioration des plantes cultivées	Pepper	Capsicum	annuum	Traditional cultivar	NO	NO
PM02111	CAP 1404	2019	unknown	Institut pour Amélioration des plantes cultivées	Pepper	Capsicum	annuum	Traditional cultivar	NO	NO
PM02112	CAP 1407	2019	unknown	Institut pour Amélioration des plantes cultivées	Pepper	Capsicum	annuum	Traditional cultivar	NO	NO
PM02113	CAP 1408	2019	unknown	Institut pour Amélioration des plantes cultivées	Pepper	Capsicum	annuum	Traditional cultivar	NO	NO
PM02114	CAP 1410	2019	unknown	Institut pour Amélioration des plantes cultivées	Pepper	Capsicum	annuum	Traditional cultivar	NO	NO
PM02115	CAP 1414	2019	unknown	Institut pour Amélioration des plantes cultivées	Pepper	Capsicum	annuum	Traditional cultivar	NO	NO
PM02116	CAP 1417	2019	unknown	Institut pour Amélioration des plantes cultivées	Pepper	Capsicum	annuum	Traditional cultivar	NO	NO
PM02117	CAP 1434	2019	unknown	Institut pour Amélioration des plantes cultivées	Pepper	Capsicum	annuum var. glabriusculum	Traditional cultivar	NO	NO
PM02118	CAP 1436	2019	unknown	Institut pour Amélioration des plantes cultivées	Pepper	Capsicum	annuum	Traditional cultivar	NO	NO
PM02119	Adygejskij	2019	unknown	Institut pour Amélioration des plantes cultivées	Pepper	Capsicum	annuum		NO	NO
PM02120	rogulja [vernacular name]	2019	unknown	Institut pour Amélioration des plantes cultivées	Pepper	Capsicum	annuum	Traditional cultivar	NO	NO
PM02121	ljuta paprika [vernacular name]	2019	unknown	Institut pour Amélioration des plantes cultivées	Pepper	Capsicum	annuum	Traditional cultivar	NO	NO
PM02122	ljuta [vernacular name]	2019	unknown	Institut pour Amélioration des plantes cultivées	Pepper	Capsicum	annuum	Traditional cultivar	NO	NO
PM02123	(slatka) paradaji [vernacular name]	2019	unknown	Institut pour Amélioration des plantes cultivées	Pepper	Capsicum	annuum		NO	NO
PM02124	Variegated Flash	2019	unknown	Institut pour Amélioration des plantes cultivées	Pepper	Capsicum	annuum	Traditional cultivar	NO	NO
PM02125	ljuta [vernacular name]	2019	unknown	Institut pour Amélioration des plantes cultivées	Pepper	Capsicum	annuum	Traditional cultivar	NO	NO
PM02126	CAP 1595	2019	unknown	Institut pour Amélioration des plantes cultivées	Pepper	Capsicum	annuum	Traditional cultivar	NO	NO
PM02127	CAP 1605	2019	unknown	Institut pour Amélioration des plantes cultivées	Pepper	Capsicum	annuum	Traditional cultivar	NO	NO
PM02128	CAP 1611	2019	unknown	Institut pour Amélioration des plantes cultivées	Pepper	Capsicum	annuum	Traditional cultivar	NO	NO
PM02129	CAP 1612	2019	unknown	Institut pour Amélioration des plantes cultivées	Pepper	Capsicum	annuum		NO	NO
PM02130	CAP 1620	2019	unknown	Institut pour Amélioration des plantes cultivées	Pepper	Capsicum	annuum	Breeding/research material	NO	NO
PM02131	CHILLON BLANCO; ROTFRUECHTIG	2019	unknown	Institut pour Amélioration des plantes cultivées	Pepper	Capsicum	annuum	Traditional cultivar	NO	NO
PM02132	CARLISTON	2019	unknown	Institut pour Amélioration des plantes cultivées	Pepper	Capsicum	annuum	Traditional cultivar	NO	NO
PM02133	BISBAS	2019	unknown	Institut pour Amélioration des plantes cultivées	Pepper	Capsicum	annuum	Traditional cultivar	NO	NO
PM02134	GUINDILLA BLANCA; ROTFRUECHTIG	2019	unknown	Institut pour Amélioration des plantes cultivées	Pepper	Capsicum	annuum	Breeding/research material	NO	NO
PM02135	GUINDILLA BORREGUERA; ROTFRUECHTIG	2019	unknown	Institut pour Amélioration des plantes cultivées	Pepper	Capsicum	annuum	Traditional cultivar	NO	NO
PM02136	DE BANYA; ROTFRUECHTIG	2019	unknown	Institut pour Amélioration des plantes cultivées	Pepper	Capsicum	annuum	Traditional cultivar	NO	NO
PM02137	BISBAS	2019	unknown	Institut pour Amélioration des plantes cultivées	Pepper	Capsicum	annuum	Breeding/research material	NO	NO
PM02138	58373	2019	unknown	Institut pour Amélioration des plantes cultivées	Pepper	Capsicum	annuum	Traditional cultivar	NO	NO
PM02139	58372	2019	unknown	Institut pour Amélioration des plantes cultivées	Pepper	Capsicum	annuum		NO	NO
PM02140	DEL TERRENO; ROTFRUECHTIG	2019	unknown	Institut pour Amélioration des plantes cultivées	Pepper	Capsicum	annuum		NO	NO
PM02141	BISBAS	2019	unknown	Institut pour Amélioration des plantes cultivées	Pepper	Capsicum	annuum	Breeding/research material	NO	NO
PM02142	CAP 1701	2019	unknown	Institut pour Amélioration des plantes cultivées	Pepper	Capsicum	annuum		NO	NO
PM02143	Filius Gelb	2019	unknown	Institut pour Amélioration des plantes cultivées	Pepper	Capsicum	annuum		NO	NO
PM02144	Filius Rot	2019	unknown	Institut pour Amélioration des plantes cultivées	Pepper	Capsicum	annuum		NO	NO
PM02145	Zuchtmaterial Nr. 1	2019	unknown	Institut pour Amélioration des plantes cultivées	Pepper	Capsicum	annuum	Breeding/research material	NO	NO
PM02146	Marktgartner Mischung	2019	unknown	Institut pour Amélioration des plantes cultivées	Pepper	Capsicum	annuum		NO	NO
PM02147	Keszthelyi Feher	2019	unknown	Institut pour Amélioration des plantes cultivées	Pepper	Capsicum	annuum	Traditional cultivar	NO	NO
PM02148	Bogyiszloi Vastaghusu	2019	unknown	Institut pour Amélioration des plantes cultivées	Pepper	Capsicum	annuum	Traditional cultivar	NO	NO
PM02149	Szegedi Csipos 48-163	2019	unknown	Institut pour Amélioration des plantes cultivées	Pepper	Capsicum	annuum	Traditional cultivar	NO	NO
PM02150	Kovacshazi Hajiatasi	2019	unknown	Institut pour Amélioration des plantes cultivées	Pepper	Capsicum	annuum	Traditional cultivar	NO	NO
PM02151	CAP 446	2019	unknown	Institut pour Amélioration des plantes cultivées	Pepper	Capsicum	annuum	Traditional cultivar	NO	NO
PM02152	CAP 447	2019	unknown	Institut pour Amélioration des plantes cultivées	Pepper	Capsicum	annuum		NO	NO
PM02153	CAP 449	2019	unknown	Institut pour Amélioration des plantes cultivées	Pepper	Capsicum	baccatum	WILD	NO	NO
PM02154	CAP 460	2019	unknown	Institut pour Amélioration des plantes cultivées	Pepper	Capsicum	annuum		NO	NO
PM02155	CAP 481	2019	unknown	Institut pour Amélioration des plantes cultivées	Pepper	Capsicum	annuum	Traditional cultivar	NO	NO
PM02156	Blackbirds Eye	2019	unknown	Institut pour Amélioration des plantes cultivées	Pepper	Capsicum	annuum	Traditional cultivar	NO	NO
PM02157	CAP 501	2019	unknown	Institut pour Amélioration des plantes cultivées	Pepper	Capsicum	chacoense	Traditional cultivar	NO	NO
PM02158	Bell	2019	unknown	Institut pour Amélioration des plantes cultivées	Pepper	Capsicum	annuum	Traditional cultivar	NO	NO
PM02159	CAP 533	2019	unknown	Institut pour Amélioration des plantes cultivées	Pepper	Capsicum	annuum	Traditional cultivar	NO	NO
PM02160	CAP 542	2019	unknown	Institut pour Amélioration des plantes cultivées	Pepper	Capsicum	annuum		NO	NO
PM02161	1829	2019	unknown	Institut pour Amélioration des plantes cultivées	Pepper	Capsicum	annuum		NO	NO
PM02162	peperone giallo [vernacular name]	2019	unknown	Institut pour Amélioration des plantes cultivées	Pepper	Capsicum	annuum		NO	NO
PM02163	CAP 564	2019	unknown	Institut pour Amélioration des plantes cultivées	Pepper	Capsicum	annuum	Traditional cultivar	NO	NO
PM02164	Zlaten Medal	2019	unknown	Institut pour Amélioration des plantes cultivées	Pepper	Capsicum	annuum	Traditional cultivar	NO	NO
PM02165	Fips	2019	unknown	Institut pour Amélioration des plantes cultivées	Pepper	Capsicum	annuum		NO	NO
PM02166	Chili de Conida	2019	unknown	Institut pour Amélioration des plantes cultivées	Pepper	Capsicum	annuum	Traditional cultivar	NO	NO
PM02167	CAP 583	2019	unknown	Institut pour Amélioration des plantes cultivées	Pepper	Capsicum	annuum	Traditional cultivar	NO	NO
PM02168	CAP 586	2019	unknown	Institut pour Amélioration des plantes cultivées	Pepper	Capsicum	annuum		NO	NO
PM02169	Fips	2019	unknown	Institut pour Amélioration des plantes cultivées	Pepper	Capsicum	annuum	Traditional cultivar	NO	NO
PM02170	CAP 602	2019	unknown	Institut pour Amélioration des plantes cultivées	Pepper	Capsicum	annuum	Traditional cultivar	NO	NO
PM02171	CAP 617	2019	unknown	Institut pour Amélioration des plantes cultivées	Pepper	Capsicum	annuum	Traditional cultivar	NO	NO
PM02172	Klenot	2019	unknown	Institut pour Amélioration des plantes cultivées	Pepper	Capsicum	annuum	Traditional cultivar	NO	NO
PM02173	zafferano [vernacular name]	2019	unknown	Institut pour Amélioration des plantes cultivées	Pepper	Capsicum	annuum	Traditional cultivar	NO	NO
PM02174	spagnioletti [vernacular name]	2019	unknown	Institut pour Amélioration des plantes cultivées	Pepper	Capsicum	annuum	Traditional cultivar	NO	NO
PM02175	CAP 635	2019	unknown	Institut pour Amélioration des plantes cultivées	Pepper	Capsicum	annuum		NO	NO
PM02176	CAP 636	2019	unknown	Institut pour Amélioration des plantes cultivées	Pepper	Capsicum	annuum		NO	NO
PM02177	CAP 648	2019	unknown	Institut pour Amélioration des plantes cultivées	Pepper	Capsicum	annuum	Traditional cultivar	NO	NO
PM02178	CAP 672	2019	unknown	Institut pour Amélioration des plantes cultivées	Pepper	Capsicum	annuum	Traditional cultivar	NO	NO
PM02179	Sperlings Merit	2019	unknown	Institut pour Amélioration des plantes cultivées	Pepper	Capsicum	annuum	Traditional cultivar	NO	NO
PM02180	Sweet Orange	2019	unknown	Institut pour Amélioration des plantes cultivées	Pepper	Capsicum	annuum	Traditional cultivar	NO	NO
PM02181	738	2019	unknown	Institut pour Amélioration des plantes cultivées	Pepper	Capsicum	annuum	Traditional cultivar	NO	NO
PM02182	CAP 738	2019	unknown	Institut pour Amélioration des plantes cultivées	Pepper	Capsicum	annuum	Traditional cultivar	NO	NO
PM02183	CAP 740	2019	unknown	Institut pour Amélioration des plantes cultivées	Pepper	Capsicum	annuum		NO	NO
PM02184	Kovacshazi Hajiatasi	2019	unknown	Institut pour Amélioration des plantes cultivées	Pepper	Capsicum	annuum	Traditional cultivar	NO	NO
PM02185	CAP 749	2019	unknown	Institut pour Amélioration des plantes cultivées	Pepper	Capsicum	annuum	Traditional cultivar	NO	NO
PM02186	pimiento [vernacular name]	2019	unknown	Institut pour Amélioration des plantes cultivées	Pepper	Capsicum	annuum	Traditional cultivar	NO	NO
PM02187	Torfico (CW-3)	2019	unknown	Institut pour Amélioration des plantes cultivées	Pepper	Capsicum	annuum	Traditional cultivar	NO	NO
PM02188	CAP 786	2019	unknown	Institut pour Amélioration des plantes cultivées	Pepper	Capsicum	annuum	Traditional cultivar	NO	NO
PM02189	CAP 791	2019	unknown	Institut pour Amélioration des plantes cultivées	Pepper	Capsicum	annuum	Traditional cultivar	NO	NO
PM02190	CAP 793	2019	unknown	Institut pour Amélioration des plantes cultivées	Pepper	Capsicum	annuum	Traditional cultivar	NO	NO
PM02191	CAP 831	2019	unknown	Institut pour Amélioration des plantes cultivées	Pepper	Capsicum	baccatum		NO	NO
PM02192	CAP 846	2019	unknown	Institut pour Amélioration des plantes cultivées	Pepper	Capsicum	annuum	Traditional cultivar	NO	NO
PM02193	CAP 859	2019	unknown	Institut pour Amélioration des plantes cultivées	Pepper	Capsicum	annuum	Traditional cultivar	NO	NO
PM02194	CAP 902	2019	unknown	Institut pour Amélioration des plantes cultivées	Pepper	Capsicum	annuum	Traditional cultivar	NO	NO
PM02195	California Wonder	2019	unknown	Institut pour Amélioration des plantes cultivées	Pepper	Capsicum	annuum	Traditional cultivar	NO	NO
PM02196	aji [vernacular name]	2019	unknown	Institut pour Amélioration des plantes cultivées	Pepper	Capsicum	annuum	Traditional cultivar	NO	NO
PM02197	aji [vernacular name]	2019	unknown	Institut pour Amélioration des plantes cultivées	Pepper	Capsicum	annuum	Traditional cultivar	NO	NO
PM02198	CAP 969	2019	unknown	Institut pour Amélioration des plantes cultivées	Pepper	Capsicum	chinense	Traditional cultivar	NO	NO
PM02199	P 1077	2019	unknown	Institut pour Amélioration des plantes cultivées	Pepper	Capsicum	annuum	Traditional cultivar	NO	NO
PM02200	Stryama	2019	unknown	MVCRI	Pepper	Capsicum	annuum		NO	NO
PM02201	Kalinkov 800/7	2019	unknown	MVCRI	Pepper	Capsicum	annuum		NO	NO
PM02202	Maritsa	2019	unknown	MVCRI	Pepper	Capsicum	annuum		NO	NO
PM02203	Bulgarski ratund	2019	unknown	MVCRI	Pepper	Capsicum	annuum	Traditional cultivar	NO	NO
PM02204	Slonovo uvo	2019	unknown	MVCRI	Pepper	Capsicum	annuum		NO	NO
PM02205	Palanachko chudo	2019	unknown	MVCRI	Pepper	Capsicum	annuum		NO	NO
PM02206	Kapia Byala reka	2019	unknown	MVCRI	Pepper	Capsicum	annuum	Traditional cultivar	NO	NO
PM02207	Buketen 50	2019	unknown	MVCRI	Pepper	Capsicum	annuum		NO	NO
PM02208	Pimiento cerecilla	2019	unknown	Polytechnical University of Valencia	Pepper	Capsicum	annuum	Traditional cultivar	NO	NO
PM02209	Pimiento picante matanza	2019	unknown	Polytechnical University of Valencia	Pepper	Capsicum	annuum	Traditional cultivar	NO	NO
PM02210	Pimiento cornicabra grueso	2019	unknown	Polytechnical University of Valencia	Pepper	Capsicum	annuum	Traditional cultivar	NO	NO
PM02211	Pimiento cornicabra fino	2019	unknown	Polytechnical University of Valencia	Pepper	Capsicum	annuum	Traditional cultivar	NO	NO
PM02212	Pimiento	2019	unknown	Polytechnical University of Valencia	Pepper	Capsicum	annuum	Traditional cultivar	NO	NO
PM02213	Pimiento picante alargado	2019	unknown	Polytechnical University of Valencia	Pepper	Capsicum	annuum	Traditional cultivar	NO	NO
PM02214	Pebrot marrxF3	2019	unknown	Polytechnical University of Valencia	Pepper	Capsicum	annuum	Traditional cultivar	NO	NO
PM02215	Pimiento vermell mallorquxED	2019	unknown	Polytechnical University of Valencia	Pepper	Capsicum	annuum	Traditional cultivar	NO	NO
PM02216	Pimienta de la puta madre	2019	unknown	Polytechnical University of Valencia	Pepper	Capsicum	annuum	Traditional cultivar	NO	NO
PM02217	Pimienta de la puta madre	2019	unknown	Polytechnical University of Valencia	Pepper	Capsicum	annuum	Traditional cultivar	NO	NO
PM02218	Pimienta para secar	2019	unknown	Polytechnical University of Valencia	Pepper	Capsicum	annuum	Traditional cultivar	NO	NO
PM02219	Pimienta palmera	2019	unknown	Polytechnical University of Valencia	Pepper	Capsicum	annuum	Traditional cultivar	NO	NO
PM02220	BGV002656	2019	unknown	Polytechnical University of Valencia	Pepper	Capsicum	annuum	Traditional cultivar	NO	NO
PM02221	Pimiento	2019	unknown	Polytechnical University of Valencia	Pepper	Capsicum	annuum	Traditional cultivar	NO	NO
PM02222	Pimiento del PaxEDs	2019	unknown	Polytechnical University of Valencia	Pepper	Capsicum	annuum	Traditional cultivar	NO	NO
PM02223	Pebreretes del Palmar	2019	unknown	Polytechnical University of Valencia	Pepper	Capsicum	annuum		NO	NO
PM02224	IVIA-013	2019	unknown	Polytechnical University of Valencia	Pepper	Capsicum	annuum	Traditional cultivar	NO	NO
PM02225	Guindilla picante	2019	unknown	Polytechnical University of Valencia	Pepper	Capsicum	annuum	Traditional cultivar	NO	NO
PM02226	Guindilla cachorra	2019	unknown	Polytechnical University of Valencia	Pepper	Capsicum	annuum	Traditional cultivar	NO	NO
PM02227	Guindilla para vinagreta	2019	unknown	Polytechnical University of Valencia	Pepper	Capsicum	annuum	Traditional cultivar	NO	NO
PM02228	Pimiento de plaza	2019	unknown	Polytechnical University of Valencia	Pepper	Capsicum	annuum	Traditional cultivar	NO	NO
PM02229	Pimiento de Isla	2019	unknown	Polytechnical University of Valencia	Pepper	Capsicum	annuum	Traditional cultivar	NO	NO
PM02230	Pimiento para pimenton	2019	unknown	Polytechnical University of Valencia	Pepper	Capsicum	annuum	Traditional cultivar	NO	NO
PM02231	Pimiento dulce	2019	unknown	Polytechnical University of Valencia	Pepper	Capsicum	annuum	Traditional cultivar	NO	NO
PM02232	Pimiento largo tres venas	2019	unknown	Polytechnical University of Valencia	Pepper	Capsicum	annuum	Traditional cultivar	NO	NO
PM02233	Guindilla de Ibarra	2019	unknown	Polytechnical University of Valencia	Pepper	Capsicum	annuum	WILD	NO	NO
PM02234	Aji (AjxED)	2019	unknown	Polytechnical University of Valencia	Pepper	Capsicum	baccatum		NO	NO
PM02235	numextwilight	2019	unknown	CREA Italie	Pepper	Capsicum	annuum	Traditional cultivar	NO	NO
PM02236	CAP1546	2019	unknown	CREA Italie	Pepper	Capsicum	annuum	Traditional cultivar	NO	NO
PM02237	PimientoPilatos	2019	unknown	CREA Italie	Pepper	Capsicum	annuum		NO	NO
PM02238	Peter Pepper	2019	unknown	CREA Italie	Pepper	Capsicum	annuum	Traditional cultivar	NO	NO
PM02239	Yemen1	2019	unknown	CREA Italie	Pepper	Capsicum	annuum		NO	NO
PM02240	Yemen2	2019	unknown	CREA Italie	Pepper	Capsicum	annuum	Traditional cultivar	NO	NO
PM02241	Ungherese5	2019	unknown	CREA Italie	Pepper	Capsicum	annuum	Traditional cultivar	NO	NO
PM02242	Mistery Pakistan	2019	unknown	CREA Italie	Pepper	Capsicum	annuum	Traditional cultivar	NO	NO
PM02243	Ttaengcho	2019	unknown	CREA Italie	Pepper	Capsicum	annuum	Traditional cultivar	NO	NO
PM02244	trottolino	2019	unknown	CREA Italie	Pepper	Capsicum	annuum	Traditional cultivar	NO	NO
PM02245	Kilsiuri	2019	unknown	CREA Italie	Pepper	Capsicum	annuum		NO	NO
PM02246	RCAT077650	2019	unknown	CREA Italie	Pepper	Capsicum	annuum	WILD	NO	NO
PM02247	BlackpearlRed	2019	unknown	CREA Italie	Pepper	Capsicum	annuum		NO	NO
PM02248	Ciliegiapicc	2019	unknown	CREA Italie	Pepper	Capsicum	annuum		NO	NO
PM02249	piccante2	2019	unknown	CREA Italie	Pepper	Capsicum	annuum		NO	NO
PM02250	L242	2019	unknown	CREA Italie	Pepper	Capsicum	annuum		NO	NO
PM02251	bucciasottile	2019	unknown	CREA Italie	Pepper	Capsicum	annuum		NO	NO
PM02252	NumexBailey	2019	unknown	CREA Italie	Pepper	Capsicum	annuum		NO	NO
PM02253	BihJolokia	2019	unknown	CREA Italie	Pepper	Capsicum	chinense		NO	NO
PM02254	Caiamarca	2019	unknown	CREA Italie	Pepper	Capsicum	chinense		NO	NO
PM02255	Jaguar	2019	unknown	CREA Italie	Pepper	Capsicum	chinense		NO	NO
PM02256	Limon	2019	unknown	CREA Italie	Pepper	Capsicum	chinense		NO	NO
PM02257	PI 167062	2019	unknown	CGN/ Pays Bas	Pepper	Capsicum	annuum		NO	NO
PM02258	Propa	2019	unknown	CGN/ Pays Bas	Pepper	Capsicum	annuum		NO	NO
PM02259	SA 361	2019	unknown	CGN/ Pays Bas	Pepper	Capsicum	baccatum		NO	NO
PM02260	AC 1979	2019	unknown	CGN/ Pays Bas	Pepper	Capsicum	annuum		NO	NO
PM02261	PI 224450 selection; No. 1646	2019	unknown	CGN/ Pays Bas	Pepper	Capsicum	annuum		NO	NO
PM02262	RU 72-48	2019	unknown	CGN/ Pays Bas	Pepper	Capsicum	baccatum		NO	NO
PM02263	PI 281428 Selection	2019	unknown	CGN/ Pays Bas	Pepper	Capsicum	chinense		NO	NO
PM02264	1GAA	2019	unknown	CGN/ Pays Bas	Pepper	Capsicum	chinense		NO	NO
PM02265	PI 260567	2019	unknown	CGN/ Pays Bas	Pepper	Capsicum	baccatum		NO	NO
PM02266	CGN23298	2019	unknown	CGN/ Pays Bas	Pepper	Capsicum	annuum		NO	NO
PM02267	Criollos de Morelos	2019	unknown	CGN/ Pays Bas	Pepper	Capsicum	annuum		NO	NO
PM02268	Northern Belle No.2	2019	unknown	CGN/ Pays Bas	Pepper	Capsicum	annuum		NO	NO
PM02269	JAPAN #2	2019	unknown	AVRDC TAIWAN	Pepper	Capsicum	annuum		NO	NO
PM02270	UNNAMED	2019	unknown	AVRDC TAIWAN	Pepper	Capsicum	annuum		NO	NO
PM02271	H.P.ACC#125a	2019	unknown	AVRDC TAIWAN	Pepper	Capsicum	annuum		NO	NO
PM02272	SZEGEDI CSERESZNYE	2019	unknown	AVRDC TAIWAN	Pepper	Capsicum	annuum		NO	NO
PM02273	ANAHEIM F-6	2019	unknown	AVRDC TAIWAN	Pepper	Capsicum	annuum		NO	NO
PM02274	PI 175622	2019	unknown	AVRDC TAIWAN	Pepper	Capsicum	annuum		NO	NO
PM02275	VAR 6-1	2019	unknown	AVRDC TAIWAN	Pepper	Capsicum	annuum		NO	NO
PM02276	CP NO. 6 (CILI PADI)	2019	unknown	AVRDC TAIWAN	Pepper	Capsicum	annuum		NO	NO
PM02277	C10	2019	unknown	AVRDC TAIWAN	Pepper	Capsicum	annuum	Traditional cultivar	NO	NO
PM02278	CAP 170/76	2019	unknown	AVRDC TAIWAN	Pepper	Capsicum	annuum	Traditional cultivar	NO	NO
PM02279	SIPKA WEIBE SAHARLE	2019	unknown	AVRDC TAIWAN	Pepper	Capsicum	annuum	Traditional cultivar	NO	NO
PM02280	BOLGAR FELALLO	2019	unknown	AVRDC TAIWAN	Pepper	Capsicum	annuum	Traditional cultivar	NO	NO
PM02281	FRIESDORFER GELBER	2019	unknown	AVRDC TAIWAN	Pepper	Capsicum	annuum	Traditional cultivar	NO	NO
PM02282	UL JIN JAE LAE	2019	unknown	AVRDC TAIWAN	Pepper	Capsicum	annuum	Traditional cultivar	NO	NO
PM02283	KIM HAE JAE LAE	2019	unknown	AVRDC TAIWAN	Pepper	Capsicum	annuum		NO	NO
PM02284	CRIOLLO DE MORELOS 334	2019	unknown	AVRDC TAIWAN	Pepper	Capsicum	annuum		NO	NO
PM02285	JAVITOTT CECEI	2019	unknown	AVRDC TAIWAN	Pepper	Capsicum	annuum		NO	NO
PM02286	P 602/85	2019	unknown	AVRDC TAIWAN	Pepper	Capsicum	annuum		NO	NO
PM02287	VERDE URIAS 41	2019	unknown	AVRDC TAIWAN	Pepper	Capsicum	annuum	Traditional cultivar	NO	NO
PM02288	TOMATENFRUCHTIGER GELB	2019	unknown	AVRDC TAIWAN	Pepper	Capsicum	annuum	Traditional cultivar	NO	NO
PM02289	SZEGEDI CSIPOS 48-158	2019	unknown	AVRDC TAIWAN	Pepper	Capsicum	annuum	Traditional cultivar	NO	NO
[truncated: 279 more rows]

## Sheet: TOMATO
Accession code	Name	Introduction year	Origin country	Donor	Taxon	Genus	Species (previous name)	Species (new name)	Biological status	National collection	Network collection
[truncated: 3,410 more rows]

[truncated: 2 more sheets: MELON, LETTUCE]
